# Supplementary material for: Photoredox-catalyzed selective deuterodefluorination of α,α-difluoroarylacetic esters and amides
Source: Royal Society of Chemistry journal article supplement (doi:10.1039/d4qo00781f), 2024-01-01

## Supporting Information

### Photoredox-catalyzed selective deutero-defluorination of $\alpha$ , $\alpha$ -difluoroarylacetic esters and amides

Zi-Hang Yuan,<sup>a</sup> Hong Xin,<sup>a</sup> Yuan Gao,<sup>a</sup> Guo-Wei Sun,<sup>a</sup> Rui-Ying Zhao,<sup>a</sup>

Xin-Hua Duan,<sup>a,b</sup> and Li-Na Guo<sup>\*a</sup>

<sup>a</sup>Department of Chemistry, School of Chemistry, Xi'an Key Laboratory of Sustainable Energy Material Chemistry and Engineering Research Center of Energy Storage, Materials and Devices, Ministry of Education, Xi'an Jiaotong University, Xi'an 710049, P. R. China.

<sup>b</sup>State Key Laboratory of Applied Organic Chemistry, Lanzhou University, Lanzhou 730000, P. R. China.

#### Table of Contents

|                                                                                              |     |
|----------------------------------------------------------------------------------------------|-----|
| 1. General Information                                                                       | S2  |
| 2. Starting Materials                                                                        | S3  |
| 2.1 Synthesis of <b>1b-1v</b>                                                                | S3  |
| 2.2 Characterization Data of <b>1</b>                                                        | S5  |
| 3. Optimization of Reaction Conditions                                                       | S12 |
| 3.1 General Procedures for <b>1a</b> with D <sub>2</sub> O                                   | S12 |
| 3.2 Optimization of the Deutero-defluorination of Reaction <b>1a</b> with D <sub>2</sub> O   | S13 |
| 4. Representative Procedure for the Deutero-defluorination of <b>1</b> with D <sub>2</sub> O | S22 |
| 4.1 Monodeutero-defluorination                                                               | S22 |
| 4.2 Dideutero-defluorination                                                                 | S22 |
| 4.3 Applied Research                                                                         | S24 |
| 5. Mechanism Studies                                                                         | S28 |
| 5.1 Radical Inhibiting Experiments                                                           | S28 |
| 5.2 EPR Experiments                                                                          | S30 |
| 5.3 Transformation of <b>1a</b> to <b>4a/5a</b> without Ir(ppy) <sub>3</sub>                 | S31 |
| 5.4 Stern-Volmer Fluorescence Quenching Experiments                                          | S32 |
| 5.5 Light On-Off Experiments                                                                 | S33 |
| 5.6 Cyclic Voltammetry Experiments                                                           | S34 |
| 5.7 Proportions of <b>2a</b> and <b>3a</b> under Conditions A and B                          | S36 |
| 5.8 Proposed mechanism (double defluorinative deuteration)                                   | S36 |
| 6. Characterization of Products                                                              | S37 |
| 7. References                                                                                | S51 |
| 8. <sup>1</sup> H, <sup>13</sup> C and <sup>19</sup> F NMR Spectra of Products               | S52 |

## 1. General Information

All reactions were conducted in 10 mL oven-dried sealed tube under N<sub>2</sub> atmosphere. Unless otherwise stated, all reagents were purchased from commercial sources and used without further purification. <sup>1</sup>H, <sup>19</sup>F and <sup>13</sup>C NMR spectra were recorded on a Bruker 400 MHz (100 MHz for <sup>13</sup>C NMR) spectrometer at ambient temperature. Chemical shift are reported in ppm from TMS with the solvent resonance as internal standard (CDCl<sub>3</sub>: <sup>1</sup>H NMR: δ = 7.26; <sup>13</sup>C NMR: δ = 77.16; CFC<sub>3</sub> as an external standard and low field is positive). Coupling constants are reported in Hz with multiplicities denoted as s (singlet), d (doublet), t (triplet), q (quartet), dt (doublet of triplets), dd (doublet of doublets) and m (multiplet). FT-IR spectra were recorded on a Bruker V 70 spectrometer and only major peaks are reported in cm<sup>-1</sup>. HRMS were obtained on a WATERS I-Class VION IMS Q-ToF. Melting points were measured using open glass capillaries in a SGW® X-4A apparatus. Analytical TLC: aluminum backed plates pre-coated (0.25 mm) with Merck Silica Gel 60F-254. Compounds were visualized by exposure to UV-light or by dipping the plates in KMnO<sub>4</sub> stain followed by heating.

## 2. Starting Materials

The ethyl-2-(4-biphenyl)-2,2-difluoro-acetate **1a** and bromoaryl difluoroacetic acid ethyl ester were prepared according to the literature.<sup>1</sup>

### 2.1 Synthesis of 1b-1v

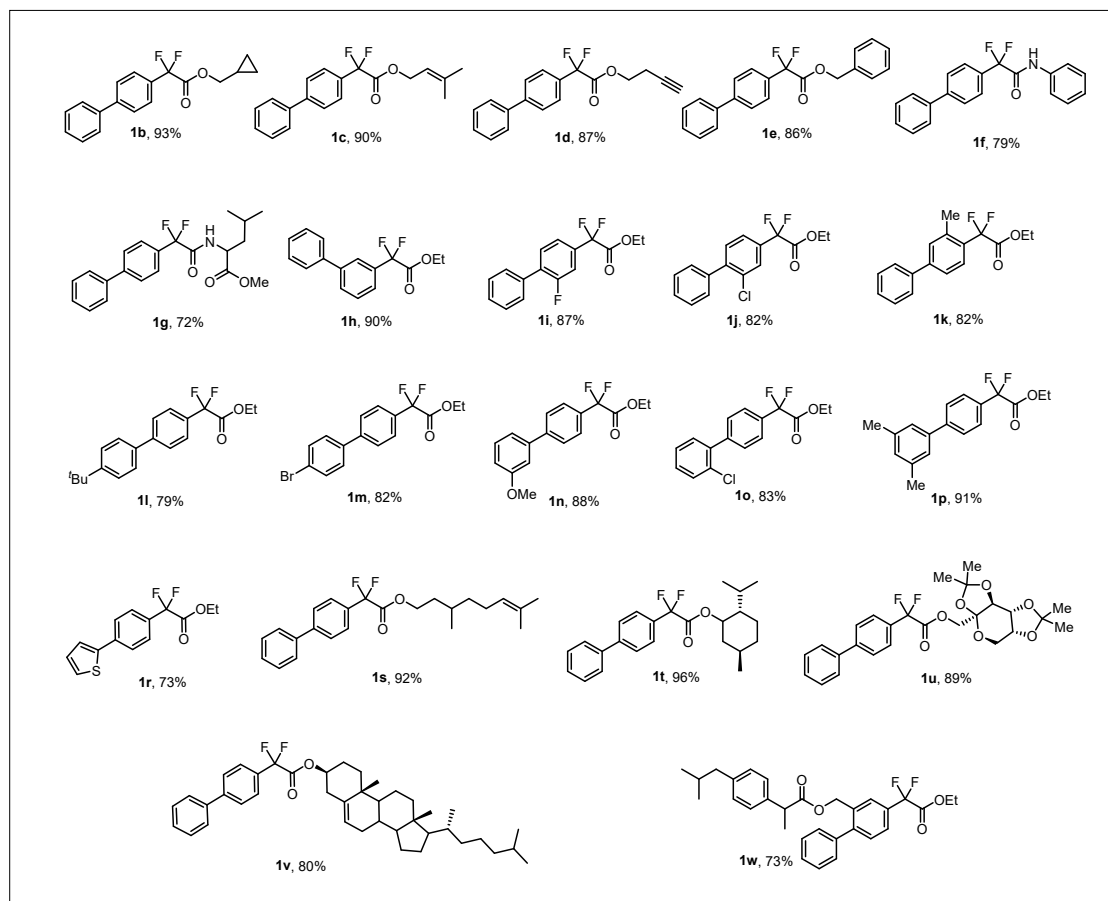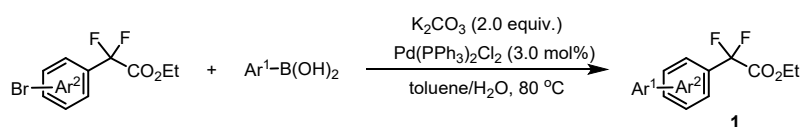

To a 10 mL oven-dried Schlenk-tube equipped with a magnetic stirrer was charged with arylboronic acid (2.4 mmol),  $\text{K}_2\text{CO}_3$  (2.0 equiv.) and  $\text{Pd}(\text{PPh}_3)_2\text{Cl}_2$  (3.0 mol%) were added. The vessel was evacuated and filled with nitrogen (three times). A solution of bromoaryl difluoroacetic acid ethyl ester (2.0 mmol) in toluene (2.0 mL) and  $\text{H}_2\text{O}$  (1.0 mL), was added via syringe. The tube was put into a heating jacket and stirred at 80 °C overnight. The reaction mixture was cooled to room temperature. The aqueous layer was extracted with ethyl acetate, the combined organic layer was dried over  $\text{Na}_2\text{SO}_4$ , filtered and concentrated under the reduced pressure. The residue was

purified by column chromatography on silica gel (PE/EtOAc = 30:1) to give the desired coupling products **1b-1l**.<sup>1, 2</sup>

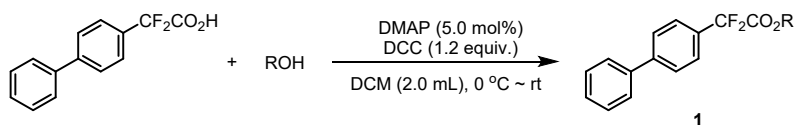

A solution of aryl difluorocarboxylic acid (2.0 mmol), corresponding alcohol (2.4 mmol), and DMAP (5.0 mol%) in DCM (2.0 mL) at 0 °C was added DCC (2.4 mmol) in one portion. A precipitate began to form almost immediately. The reaction was stirred at 0 °C for 10 min and then warmed to room temperature. After completion as detected by TLC, the reaction was then diluted with pentane (10 mL) and filtered through a short plug of silica. The aqueous layer was extracted with ethyl acetate, the combined organic layer was dried over Na<sub>2</sub>SO<sub>4</sub>, filtered and concentrated under the reduced pressure. The residue was purified by column chromatography on silica gel (PE/EtOAc = 30:1 to 10:1) to afford aryl difluorinated esters **1m-1p**, **1s-1v**.<sup>2</sup>

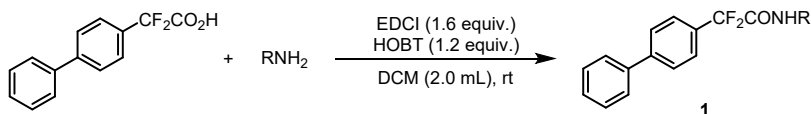

A 50 mL oven-dried Schlenk-tube equipped with a magnetic stirrer was charged with aryl difluorocarboxylic acid (2.0 mmol), EDCI (1.6 equiv.), HOBT (1.5 equiv.), and corresponding amine (2.4 mmol) were dissolved in 10 mL DCM under N<sub>2</sub>, then Et<sub>3</sub>N (4.0 mmol) was added. The reaction mixture stirred overnight. Subsequently, water was added to the Schlenk-tube. The resulting mixture was extracted with DCM (three times), and the combined organic layers were dried over Na<sub>2</sub>SO<sub>4</sub> and concentrated in vacuo. The residue was purified by column chromatography (PE/EtOAc = 4:1) to afford aryl difluorinated amides **1q** and **1r**.<sup>2</sup>

## 2.2 Characterization data of 1

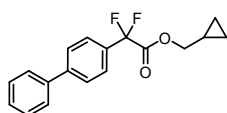

### Cyclopropylmethyl 2-([1,1'-biphenyl]-4-yl)-2,2-difluoroacetate (1b)

Colorless oil (93%, 561.9 mg); m.p.: 51-52 °C;  $R_f = 0.5$  (PE/EtOAc = 50:1);  $^1\text{H NMR}$  (400 MHz,  $\text{CDCl}_3$ )  $\delta$  7.74 – 7.68 (m, 4H), 7.63 – 7.61 (m, 2H), 7.50 – 7.46 (m, 2H), 7.43 – 7.34 (m, 1H), 4.12 (d,  $J = 7.4$  Hz, 2H), 1.25 – 1.15 (m, 1H), 0.63 – 0.58 (m, 2H), 0.35 – 0.31 (m, 2H).  $^{13}\text{C NMR}$  (100 MHz,  $\text{CDCl}_3$ )  $\delta$  164.6 (t,  $J = 35.1$  Hz), 144.1, 140.10, 131.9 (t,  $J = 25.6$  Hz), 129.2, 128.2, 127.6, 127.5, 126.2 (t,  $J = 6.0$  Hz), 113.8 (t,  $J = 250.6$  Hz), 72.1, 9.7, 3.6.  $^{19}\text{F NMR}$  (376 MHz,  $\text{CDCl}_3$ )  $\delta$  -103.45 (s); HRMS (ESI) calcd for  $\text{C}_{18}\text{H}_{16}\text{F}_2\text{O}_2\text{Li}$   $[\text{M}+\text{Li}]^+$  285.1273, found 285.1269.

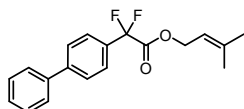

### 3-Methylbut-2-en-1-yl 2-([1,1'-biphenyl]-4-yl)-2,2-difluoroacetate (1c)

Colorless oil (90%, 568.9 mg);  $R_f = 0.5$  (PE/EtOAc = 50:1);  $^1\text{H NMR}$  (400 MHz,  $\text{CDCl}_3$ )  $\delta$  7.72 – 7.66 (m, 4H), 7.61 (d,  $J = 7.6$  Hz, 2H), 7.47 (t,  $J = 7.6$  Hz, 2H), 7.40 (t,  $J = 7.2$  Hz, 1H), 5.37 (t,  $J = 7.2$  Hz, 1H), 4.76 (d,  $J = 7.2$  Hz, 2H), 1.77 (s, 3H), 1.71 (s, 3H);  $^{13}\text{C NMR}$  (100 MHz,  $\text{CDCl}_3$ )  $\delta$  164.4 (t,  $J = 35.0$  Hz), 144.0, 141.4, 140.1, 131.8 (t,  $J = 25.6$  Hz), 129.1, 128.1, 127.5, 127.4, 126.1 (t,  $J = 5.9$  Hz), 117.1, 113.7 (t,  $J = 250.7$  Hz), 64.0, 25.9, 18.2;  $^{19}\text{F NMR}$  (376 MHz,  $\text{CDCl}_3$ )  $\delta$  -103.32 (s); HRMS (ESI) calcd for  $\text{C}_{19}\text{H}_{18}\text{F}_2\text{O}_2\text{Na}$   $[\text{M}+\text{Na}]^+$  339.1167, found 339.1155.

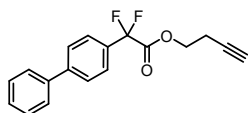

### But-3-yn-1-yl 2-([1,1'-biphenyl]-4-yl)-2,2-difluoroacetate (1d)

Colorless oil (87%, 522.2 mg);  $R_f = 0.5$  (PE/EtOAc = 40:1);  $^1\text{H NMR}$  (400 MHz,  $\text{CDCl}_3$ )  $\delta$  7.71 – 7.68 (m, 4H), 7.59 (d,  $J = 6.8$  Hz, 2H), 7.48 – 7.45 (m, 2H), 7.41 – 7.38 (m, 1H), 4.36 (t,  $J = 6.0$  Hz, 2H), 2.59 (t,  $J = 6.0$  Hz, 2H), 1.97 (s, 1H);  $^{13}\text{C NMR}$  (100 MHz,  $\text{CDCl}_3$ )  $\delta$  164.1 (t,  $J = 36.5$  Hz), 144.2, 140.0, 131.4 (t,  $J = 25.6$  Hz), 129.0, 128.1, 127.5, 127.3, 126.1 (t,  $J = 5.9$  Hz), 113.5 (t,  $J = 250.6$  Hz), 78.8, 70.6, 64.4, 18.8;  $^{19}\text{F NMR}$  (376 MHz,  $\text{CDCl}_3$ )  $\delta$  -103.67 (s); HRMS (ESI) calcd for  $\text{C}_{18}\text{H}_{18}\text{F}_2\text{O}_2\text{N}$   $[\text{M}+\text{NH}_4]^+$  318.1300, found 318.1302.

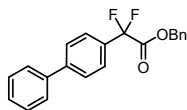

### Benzyl 2-([1,1'-biphenyl]-4-yl)-2,2-difluoroacetate (1e)

Colorless oil (86%, 581.5 mg); m.p.: 62-63 °C;  $R_f = 0.5$  (PE/EtOAc = 50:1);  $^1\text{H NMR}$  (400 MHz,  $\text{CDCl}_3$ )  $\delta$  7.69 – 7.65 (m, 5H), 7.60 (d,  $J = 7.2$  Hz, 2H), 7.50 – 7.46 (m, 3H), 7.41 (d,  $J = 6.8$  Hz, 1H), 7.34 (m, 5H), 5.29 (s, 2H);  $^{13}\text{C NMR}$  (100 MHz,  $\text{CDCl}_3$ )  $\delta$  164.2 (t,  $J = 35.5$  Hz), 144.1, 140.0, 134.3, 131.49 (t,  $J = 25.5$  Hz), 129.0, 128.82, 128.76, 128.3, 128.1, 127.5, 127.3, 126.1 (t,  $J = 6.0$  Hz), 113.6 (t,  $J = 250.7$  Hz), 68.5;  $^{19}\text{F NMR}$  (376 MHz,  $\text{CDCl}_3$ )  $\delta$  -103.57 (s); HRMS (ESI) calcd for  $\text{C}_{21}\text{H}_{16}\text{F}_2\text{O}_2$   $[\text{M}]^+$

338.1113, found 338.1105.

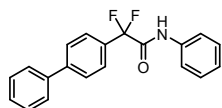

**2-([1,1'-Biphenyl]-4-yl)-2,2-difluoro-N-phenylacetamide (1f)**

White solid (79%, 510.5 mg); m.p.: 160-161 °C;  $R_f = 0.5$  (PE/EtOAc = 4:1);  $^1\text{H NMR}$  (400 MHz,  $\text{CDCl}_3$ )  $\delta$  8.15 (s, 1H), 7.76 (d,  $J = 7.8$  Hz, 2H), 7.69 (d,  $J = 5.2$  Hz, 2H), 7.61 (m, 4H), 7.49 – 7.45 (m, 2H), 7.41 – 7.36 (m, 3H), 7.22 – 7.18 (m, 1H);  $^{13}\text{C NMR}$  (100 MHz,  $\text{CDCl}_3$ )  $\delta$  162.0 (t,  $J = 29.9$  Hz), 144.2, 140.1, 136.2, 131.5 (t,  $J = 26.0$  Hz), 129.4, 129.1, 128.2, 127.6, 127.4, 126.3 (t,  $J = 6.0$  Hz), 125.8, 120.3, 115.0 (t,  $J = 252.7$  Hz);  $^{19}\text{F NMR}$  (376 MHz,  $\text{CDCl}_3$ )  $\delta$  -102.11 (s); HRMS (ESI) calcd for  $\text{C}_{20}\text{H}_{16}\text{F}_2\text{ON}$   $[\text{M}+\text{H}]^+$  324.1195, found 324.1206.

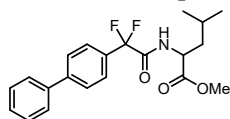

**Methyl (2-([1,1'-biphenyl]-4-yl)-2,2-difluoroacetyl)leucinate (1g)**

White solid (72%, 540.3 mg); m.p.: 92-93 °C;  $R_f = 0.5$  (PE/EtOAc = 4:1);  $^1\text{H NMR}$  (400 MHz,  $\text{CDCl}_3$ )  $\delta$  7.71 – 7.66 (m, 4H), 7.59 (d,  $J = 7.2$  Hz, 2H), 7.48 – 7.44 (m, 2H), 7.41 – 7.37 (m, 1H), 6.95 (d,  $J = 6.4$  Hz, 1H), 4.71 – 4.68 (m, 1H), 3.76 (s, 3H), 1.79 – 1.65 (m, 3H), 0.96 (s, 3H), 0.95 (s, 3H);  $^{13}\text{C NMR}$  (100 MHz,  $\text{CDCl}_3$ )  $\delta$  172.5, 164.0 (t,  $J = 31.4$  Hz), 144.0, 140.1, 131.7 (t,  $J = 25.3$  Hz), 129.0, 128.1, 127.5, 127.4, 126.1 (t,  $J = 5.9$  Hz), 115.0 (t,  $J = 251.5$  Hz), 52.7, 51.1, 41.6, 25.0, 22.8, 22.0;  $^{19}\text{F NMR}$  (376 MHz,  $\text{CDCl}_3$ )  $\delta$  -102.14 (d,  $J = 255.7$  Hz), -102.97 (d,  $J = 255.3$  Hz); HRMS (ESI) calcd for  $\text{C}_{21}\text{H}_{24}\text{F}_2\text{O}_3\text{N}$   $[\text{M}+\text{H}]^+$  376.1719, found 376.1726.

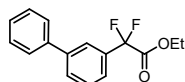

**Ethyl 2-([1,1'-biphenyl]-3-yl)-2,2-difluoroacetate (1h)**

Colorless oil (90%, 497.0 mg);  $R_f = 0.5$  (PE/EtOAc = 50:1);  $^1\text{H NMR}$  (400 MHz,  $\text{CDCl}_3$ )  $\delta$  7.85 (s, 1H), 7.73 (d,  $J = 7.2$  Hz, 1H), 7.61 (d,  $J = 7.2$  Hz, 3H), 7.56 – 7.38 (m, 4H), 4.33 (q,  $J = 6.8$  Hz, 2H), 1.33 (t,  $J = 6.8$  Hz, 3H);  $^{13}\text{C NMR}$  (100 MHz,  $\text{CDCl}_3$ )  $\delta$  164.40 (t,  $J = 35.1$  Hz), 142.0, 140.1, 133.5 (t,  $J = 25.3$  Hz), 129.9, 129.3, 129.1, 128.0, 127.3, 124.4 (t,  $J = 6.0$  Hz), 113.5 (t,  $J = 250.5$  Hz), 63.4, 14.0;  $^{19}\text{F NMR}$  (376 MHz,  $\text{CDCl}_3$ )  $\delta$  -103.72 (s); HRMS (ESI) calcd for  $\text{C}_{16}\text{H}_{14}\text{F}_2\text{O}_2$   $[\text{M}]^+$  276.0956, found 276.0943.

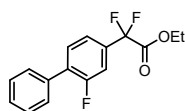

**Ethyl 2,2-difluoro-2-(2-fluoro-[1,1'-biphenyl]-4-yl)acetate (1i)**

Colorless oil (87%, 511.7 mg);  $R_f = 0.5$  (PE/EtOAc = 50:1);  $^1\text{H NMR}$  (400 MHz,  $\text{CDCl}_3$ )  $\delta$  7.57 – 7.52 (m, 3H), 7.49 – 7.43 (m, 5H), 4.35 (q,  $J = 6.8$  Hz, 2H), 1.35 (t,  $J = 6.8$  Hz, 3H);  $^{13}\text{C NMR}$  (100 MHz,  $\text{CDCl}_3$ )  $\delta$  163.9 (t,  $J = 34.9$  Hz), 159.6 (d,  $J = 248.4$  Hz), 134.7, 133.8 (dt,  $J = 26.3, 7.9$  Hz), 132.1 (d,  $J = 13.4$  Hz), 131.4 (d,  $J = 3.7$  Hz), 130.7 (d,  $J = 8.0$  Hz), 129.1 (d,  $J = 2.8$  Hz), 128.7, 128.5, 121.6 (t,  $J = 5.8$  Hz), 118.3 (d,  $J = 21.4$  Hz), 114.0 (dt,  $J = 26.1, 6.4$  Hz), 112.7 (t,  $J = 251.2$  Hz), 63.6, 14.0;  $^{19}\text{F NMR}$  (376 MHz,  $\text{CDCl}_3$ )  $\delta$  -103.64 (s), -115.97 (t,  $J = 9.0$  Hz); HRMS (ESI) calcd for  $\text{C}_{16}\text{H}_{13}\text{F}_3\text{O}_2$   $[\text{M}]^+$  294.0862, found 294.0860.

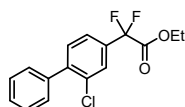

**Ethyl 2-(2-chloro-[1,1'-biphenyl]-4-yl)-2,2-difluoroacetate (1j)**

Colorless oil (82%, 508.6 mg);  $R_f = 0.5$  (PE/EtOAc = 50:1);  $^1\text{H NMR}$  (400 MHz,  $\text{CDCl}_3$ )  $\delta$  7.77 (s, 1H), 7.59 (d,  $J = 7.6$  Hz, 1H), 7.46 (s, 6H), 4.37 (q,  $J = 6.8$  Hz, 2H), 1.37 (t,  $J = 6.8$  Hz, 3H);  $^{13}\text{C NMR}$  (100 MHz,  $\text{CDCl}_3$ )  $\delta$  163.9 (t,  $J = 34.7$  Hz), 143.4, 138.4, 133.3, 133.2 (t,  $J = 34.2$  Hz), 131.8, 129.4, 128.3, 127.3 (t,  $J = 6.2$  Hz), 124.1 (t,  $J = 5.8$  Hz), 112.7 (t,  $J = 251.5$  Hz), 63.6, 14.0;  $^{19}\text{F NMR}$  (376 MHz,  $\text{CDCl}_3$ )  $\delta$  -103.72 (s); HRMS (ESI) calcd for  $\text{C}_{16}\text{H}_{13}\text{ClF}_2\text{O}_2$   $[\text{M}]^+$  310.0567, found 310.0581.

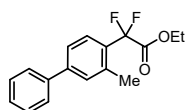

**Ethyl 2,2-difluoro-2-(3-methyl-[1,1'-biphenyl]-4-yl)acetate (1k)**

Colorless oil (82%, 475.8 mg);  $R_f = 0.5$  (PE/EtOAc = 50:1);  $^1\text{H NMR}$  (400 MHz,  $\text{CDCl}_3$ )  $\delta$  7.68 – 7.60 (m, 3H), 7.52 – 7.39 (m, 5H), 4.36 (q,  $J = 7.2$  Hz, 2H), 2.52 (s, 3H), 1.34 (t,  $J = 7.2$  Hz, 3H);  $^{13}\text{C NMR}$  (100 MHz,  $\text{CDCl}_3$ )  $\delta$  164.3 (t,  $J = 35.0$  Hz), 143.7, 140.1, 137.0 (t,  $J = 2.9$  Hz), 130.7, 130.1 (t,  $J = 23.3$  Hz), 129.0, 128.0, 127.3, 126.85 (t,  $J = 8.4$  Hz), 124.7, 114.5 (t,  $J = 250.7$  Hz), 63.3, 20.0, 14.0;  $^{19}\text{F NMR}$  (376 MHz,  $\text{CDCl}_3$ )  $\delta$  -100.97 (s); HRMS (ESI) calcd for  $\text{C}_{17}\text{H}_{17}\text{F}_2\text{O}_2$   $[\text{M}+\text{H}]^+$  291.1191, found 291.1195.

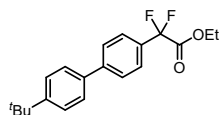

**Ethyl 2-(4'-(tert-butyl)-[1,1'-biphenyl]-4-yl)-2,2-difluoroacetate (1l)**

White solid (79%, 524.8 mg); m.p.: 62-63 °C;  $R_f = 0.5$  (PE/EtOAc = 40:1);  $^1\text{H NMR}$  (400 MHz,  $\text{CDCl}_3$ )  $\delta$  7.71 (s, 4H), 7.58 (d,  $J = 7.6$  Hz, 2H), 7.53 (d,  $J = 7.6$  Hz, 2H), 4.36 (q,  $J = 6.8$  Hz, 2H), 1.41 (s, 9H), 1.37 (t,  $J = 6.8$  Hz, 3H);  $^{13}\text{C NMR}$  (100 MHz,  $\text{CDCl}_3$ )  $\delta$  164.4 (t,  $J = 35.2$  Hz), 151.3, 143.9, 137.1, 131.4 (t,  $J = 25.5$  Hz), 127.3, 127.0, 126.0 (t,  $J = 6.1$  Hz), 113.7 (t,  $J = 250.4$  Hz), 63.3, 34.7, 31.5, 14.0;  $^{19}\text{F NMR}$  (376 MHz,  $\text{CDCl}_3$ )  $\delta$  -103.45 (s); HRMS (ESI) calcd for  $\text{C}_{20}\text{H}_{22}\text{F}_2\text{O}_2\text{Na}$   $[\text{M}+\text{Na}]^+$  355.1480, found 355.1484.

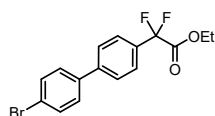

**Ethyl 2-(4'-bromo-[1,1'-biphenyl]-4-yl)-2,2-difluoroacetate (1m)**

Colorless oil (82%, 580.9 mg);  $R_f = 0.5$  (PE/EtOAc = 50:1);  $^1\text{H NMR}$  (400 MHz,  $\text{CDCl}_3$ )  $\delta$  7.69 (d,  $J = 6.8$  Hz, 2H), 7.64 – 7.57 (m, 4H), 7.46 (d,  $J = 7.2$  Hz, 2H), 4.33 (q,  $J = 7.6$  Hz, 2H), 1.33 (t,  $J = 7.6$  Hz, 3H);  $^{13}\text{C NMR}$  (100 MHz,  $\text{CDCl}_3$ )  $\delta$  164.3 (t,  $J = 35.1$  Hz), 142.8, 138.9, 132.2, 128.9, 127.3, 126.2 (t,  $J = 6.0$  Hz), 122.5, 113.5 (t,  $J = 250.7$  Hz), 63.4, 14.0;  $^{19}\text{F NMR}$  (376 MHz,  $\text{CDCl}_3$ )  $\delta$  -103.65 (s); HRMS (ESI) calcd for  $\text{C}_{16}\text{H}_{13}\text{BrF}_2\text{O}_2\text{Li}$   $[\text{M}+\text{Li}]^+$  361.0222, found 361.021.

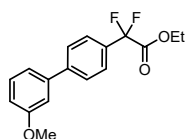

**Ethyl 2,2-difluoro-2-(3'-methoxy-[1,1'-biphenyl]-4-yl)acetate (1n)**

Colorless oil (88%, 538.8 mg);  $R_f = 0.5$  (PE/EtOAc = 30:1);  $^1\text{H NMR}$  (400 MHz,  $\text{CDCl}_3$ )  $\delta$  7.68 (s, 4H), 7.41 – 7.37 (m, 1H), 7.19 (d,  $J = 7.6$  Hz, 1H), 7.14 (s, 1H), 6.95 (d,  $J = 8.0$  Hz, 1H), 4.34 (q,  $J = 6.8$  Hz, 2H), 3.88 (s, 3H), 1.34 (t,  $J = 6.8$  Hz, 3H);  $^{13}\text{C NMR}$  (100 MHz,  $\text{CDCl}_3$ )  $\delta$  164.3 (t,  $J = 35.2$  Hz), 160.2, 143.9, 141.6, 131.9 (t,  $J = 25.5$  Hz), 130.1, 127.5, 126.1 (t,  $J = 6.0$  Hz), 119.8, 113.6, 113.5, 113.2 (t,  $J = 250.7$  Hz), 63.3, 55.4, 14.0;  $^{19}\text{F NMR}$  (376 MHz,  $\text{CDCl}_3$ )  $\delta$  -103.57 (s); HRMS (ESI) calcd for  $\text{C}_{17}\text{H}_{16}\text{F}_2\text{O}_3\text{Na}$   $[\text{M}+\text{NH}_4]^+$  329.0960, found 329.0961.

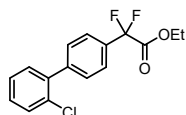

**Ethyl 2-(3'-chloro-[1,1'-biphenyl]-4-yl)-2,2-difluoroacetate (1o)**

Colorless oil (83%, 514.7 mg);  $R_f = 0.5$  (PE/EtOAc = 50:1);  $^1\text{H NMR}$  (400 MHz,  $\text{CDCl}_3$ )  $\delta$  7.69 (d,  $J = 7.6$  Hz, 2H), 7.54 (d,  $J = 7.6$  Hz, 2H), 7.49 (d,  $J = 5.6$  Hz, 1H), 7.33 (s, 3H), 4.34 (q,  $J = 6.8$  Hz, 2H), 1.34 (t,  $J = 6.8$  Hz, 3H);  $^{13}\text{C NMR}$  (100 MHz,  $\text{CDCl}_3$ )  $\delta$  164.32 (t,  $J = 35.1$  Hz), 142.3, 139.4, 132.5, 132.1 (t,  $J = 25.6$  Hz), 131.4, 130.2, 129.9, 129.3, 127.1, 125.4 (t,  $J = 5.9$  Hz), 113.5 (t,  $J = 250.6$  Hz), 63.4, 14.0;  $^{19}\text{F NMR}$  (376 MHz,  $\text{CDCl}_3$ )  $\delta$  -103.51 (s); HRMS (ESI) calcd for  $\text{C}_{16}\text{H}_{13}\text{ClF}_2\text{O}_2$   $[\text{M}]^+$  310.0567, found 310.0553.



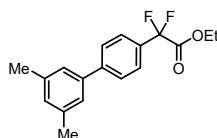

### Ethyl 2-(3',5'-dimethyl-[1,1'-biphenyl]-4-yl)-2,2-difluoroacetate (1p)

Colorless oil (91%, 553.5 mg);  $R_f = 0.5$  (PE/EtOAc = 50:1);  $^1\text{H NMR}$  (400 MHz,  $\text{CDCl}_3$ )  $\delta$  7.73 – 7.69 (m, 4H), 7.29 – 7.26 (m, 2H), 7.09 (s, 1H), 4.37 (q,  $J = 7.2$  Hz, 2H), 2.44 (s, 6H), 1.37 (t,  $J = 7.2$  Hz, 3H);  $^{13}\text{C NMR}$  (100 MHz,  $\text{CDCl}_3$ )  $\delta$  164.4 (t,  $J = 35.2$  Hz), 144.3, 140.1, 138.6, 131.5 (t,  $J = 25.6$  Hz), 129.8, 127.5, 126.0 (t,  $J = 5.9$  Hz), 125.3, 113.6 (t,  $J = 250.1$  Hz), 63.3, 21.5, 14.0;  $^{19}\text{F NMR}$  (376 MHz,  $\text{CDCl}_3$ )  $\delta$  -103.52 (s); HRMS (ESI) calcd for  $\text{C}_{18}\text{H}_{18}\text{F}_2\text{O}_2\text{Li}$   $[\text{M}+\text{Li}]^+$  311.142, found 311.1417.

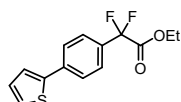

### Ethyl 2,2-difluoro-2-(4-(thiophen-2-yl)phenyl)acetate (1r)

Colorless oil (73%, 411.8 mg);  $R_f = 0.5$  (PE/EtOAc = 50:1);  $^1\text{H NMR}$  (400 MHz,  $\text{CDCl}_3$ )  $\delta$  7.72 – 7.68 (m, 2H), 7.62 (d,  $J = 7.6$  Hz, 2H), 7.38 – 7.34 (m, 2H), 7.11 (s, 1H), 4.31 (q,  $J = 6.8$  Hz, 2H), 1.32 (t,  $J = 6.8$  Hz, 3H);  $^{13}\text{C NMR}$  (100 MHz,  $\text{CDCl}_3$ )  $\delta$  164.3 (t,  $J = 35.2$  Hz), 143.0, 137.2, 131.7, 128.4, 126.3 (t,  $J = 6.1$  Hz), 126.1, 126.1, 124.4, 113.5 (t,  $J = 250.6$  Hz), 63.3, 14.0;  $^{19}\text{F NMR}$  (376 MHz,  $\text{CDCl}_3$ )  $\delta$  -103.86 (s); HRMS (ESI) calcd for  $\text{C}_{14}\text{H}_{13}\text{F}_2\text{O}_2\text{S}$   $[\text{M}+\text{H}]^+$  283.0599, found 283.0616.

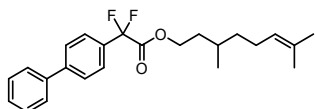

### 3,7-Dimethyloct-6-en-1-yl 2-([1,1'-biphenyl]-4-yl)-2,2-difluoroacetate (1s)

Colorless oil (92%, 710.6 mg);  $R_f = 0.5$  (PE/EtOAc = 50:1);  $^1\text{H NMR}$  (400 MHz,  $\text{CDCl}_3$ )  $\delta$  7.70 – 7.66 (m, 4H), 7.60 – 7.59 (m, 2H), 7.48 – 7.45 (m, 2H), 7.41 – 7.38 (m, 1H), 5.06 (s, 1H), 4.31 (s, 2H), 1.95 – 1.92 (m, 4H), 1.75 – 1.67 (m, 3H), 1.58 – 1.50 (m, 2H), 1.32 – 1.27 (m, 1H), 1.17 (s, 1H), 0.89 – 0.88 (m,  $J = 3.2$  Hz, 3H);  $^{13}\text{C NMR}$  (100 MHz,  $\text{CDCl}_3$ )  $\delta$  164.5 (t,  $J = 35.0$  Hz), 144.2, 140.2, 131.9 (t,  $J = 25.7$  Hz), 129.2, 128.3, 127.6, 127.5, 126.2 (t,  $J = 5.9$  Hz), 124.6, 113.7 (t,  $J = 250.6$  Hz), 65.9, 37.1, 35.3, 29.6, 25.9, 25.6, 19.5, 17.9;  $^{19}\text{F NMR}$  (376 MHz,  $\text{CDCl}_3$ )  $\delta$  -103.83 (s); HRMS (ESI) calcd for  $\text{C}_{24}\text{H}_{28}\text{F}_2\text{O}_2\text{Na}$   $[\text{M}+\text{Na}]^+$  409.1950, found 409.1951.

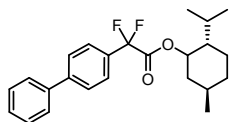

**2-Isopropyl-5-methylcyclohexyl 2-([1,1'-biphenyl]-4-yl)-2,2-difluoroacetate (1t)**

White solid (96%, 741.5 mg, d.r. = 1:1); m.p.: 99-100 °C;  $R_f$  = 0.5 (PE/EtOAc = 50:1);  $^1\text{H}$  NMR (400 MHz,  $\text{CDCl}_3$ )  $\delta$  7.67 (s, 4H), 7.60 (d,  $J$  = 7.6 Hz, 2H), 7.48 – 7.45 (m, 2H), 7.41 – 7.37 (m, 1H), 4.79 (t,  $J$  = 10.8 Hz, 1H), 4.68 (t,  $J$  = 10.8 Hz, 1H), 2.04 (s, 1H), 1.98 (d,  $J$  = 7.6 Hz, 1H), 1.89 – 1.85 (m, 1H), 1.69 (s, 1H), 1.66 (s, 1H), 1.48 – 1.42 (m, 1H), 1.40 – 1.31 (m, 1H), 1.06 – 1.02 (m, 1H), 0.91 (s, 3H), 0.89 (s, 3H), 0.81 – 0.76 (m, 1H), 0.64 (d,  $J$  = 6.4 Hz, 2H);  $^{13}\text{C}$  NMR (100 MHz,  $\text{CDCl}_3$ )  $\delta$  170.8, 163.9 (t,  $J$  = 35.1 Hz), 143.9, 140.1, 131.9 (t,  $J$  = 25.5 Hz), 129.0, 128.1, 127.34, 127.32, 126.0 (t,  $J$  = 5.9 Hz), 113.6 (t,  $J$  = 251.1 Hz), 77.8, 74.3, 47.1, 47.0, 41.0, 40.2, 34.3, 34.1, 31.5, 26.4, 26.1, 23.6, 23.4, 22.1, 22.0, 21.4, 20.8, 20.6, 16.5, 16.1;  $^{19}\text{F}$  NMR (376 MHz,  $\text{CDCl}_3$ )  $\delta$  -103.16 (d,  $J$  = 250.4 Hz), -105.07 (d,  $J$  = 250.4 Hz); HRMS (ESI) calcd for  $\text{C}_{24}\text{H}_{28}\text{F}_2\text{O}_2\text{Na}$  [ $\text{M}+\text{NH}_4$ ] $^+$  409.1950, found 409.1949.

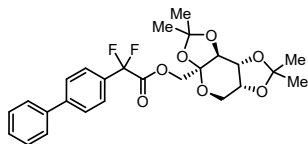

**((3aS,5aR,8aR,8bS)-2,2,7,7-tetramethyltetrahydro-3aH-bis([1,3]dioxolo)[4,5-b:4',5'-d]pyran-3a-yl)methyl 2-([1,1'-biphenyl]-4-yl)-2,2-difluoroacetate (1u)**

Colorless oil (89%, 872.6 mg, d.r. = 1:1);  $R_f$  = 0.5 (PE/EtOAc = 10:1);  $^1\text{H}$  NMR (400 MHz,  $\text{CDCl}_3$ )  $\delta$  7.71 (s, 4H), 7.62 (d,  $J$  = 6.8 Hz, 2H), 7.51 – 7.48 (m, 2H), 7.44 – 7.40 (m, 1H), 4.66 (d,  $J$  = 7.6 Hz, 1H), 4.56 (d,  $J$  = 11.6 Hz, 1H), 4.37 (s, 1H), 4.28 – 4.22 (m, 2H), 3.98 – 3.78 (m, 2H), 1.55 (s, 3H), 1.50 (s, 3H), 1.37 (s, 3H), 1.36 (s, 3H);  $^{13}\text{C}$  NMR (100 MHz,  $\text{CDCl}_3$ )  $\delta$  163.6 (t,  $J$  = 35.8 Hz), 144.2, 139.9, 131.3 (t,  $J$  = 25.4 Hz), 129.0, 128.1, 127.5, 127.3, 126.1 (t,  $J$  = 5.9 Hz), 113.5 (t,  $J$  = 250.9 Hz), 109.3, 109.3, 100.9, 70.8, 70.2, 67.0, 66.4, 61.5, 26.6, 26.0, 25.0, 24.1;  $^{19}\text{F}$  NMR (376 MHz,  $\text{CDCl}_3$ )  $\delta$  -102.14 (d,  $J$  = 253.8 Hz), -102.94 (d,  $J$  = 253.8 Hz); HRMS (ESI) calcd for  $\text{C}_{26}\text{H}_{32}\text{F}_2\text{O}_7\text{N}$  [ $\text{M}+\text{NH}_4$ ] $^+$  508.2141, found 508.2163.

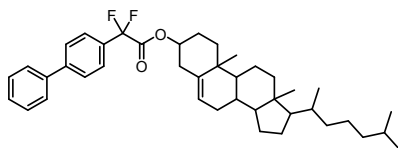

**10,13-dimethyl-17-(6-methylheptan-2-yl)-2,3,4,7,8,9,10,11,12,13,14,15,16,17-tetradecahydro-1H-cyclopenta[a]phenanthren-3-yl-2-([1,1'-biphenyl]-4-yl)-2,2-difluoroacetate (1v)**

White solid (80%, 986.2 mg, d.r. = 1:1); m.p.: 108-109 °C;  $R_f$  = 0.5 (PE/EtOAc = 50:1);  $^1\text{H}$  NMR (400 MHz,  $\text{CDCl}_3$ )  $\delta$  7.73 – 7.68 (m, 4H), 7.62 (d,  $J$  = 7.2 Hz, 2H), 7.50 – 7.46 (m, 1H), 7.42 – 7.39 (m, 1H), 5.41 (s, 1H), 4.83 – 4.76 (m, 2H), 2.47 – 2.40 (m, 2H), 2.06 – 1.89 (m, 6H), 1.75 – 1.46 (m, 9H), 1.39 – 1.29 (m, 5H), 1.18 – 1.09 (m, 8H), 1.05 (d,  $J$  = 15.8 Hz, 5H), 0.95 (d,  $J$  = 6.0 Hz, 3H), 0.91 (d,  $J$  = 6.4 Hz, 6H), 0.71 (s, 3H);  $^{13}\text{C}$  NMR (100 MHz,  $\text{CDCl}_3$ )  $\delta$  163.7 (t,  $J$  = 34.9 Hz), 143.9, 140.0, 138.9, 131.9 (t,  $J$  = 25.6 Hz), 129.0, 128.1, 127.4, 127.3, 126.1 (t,  $J$  = 5.8 Hz), 123.5,

113.6 (t,  $J = 250.6$  Hz), 56.8, 56.2, 50.1, 42.4, 39.8, 39.6, 37.7, 36.9, 36.6, 36.3, 35.9, 32.0, 31.9, 28.4, 28.1, 27.5, 24.4, 24.0, 23.0, 22.7, 21.1, 19.4, 18.8, 12.0;  $^{19}\text{F}$  NMR (376 MHz,  $\text{CDCl}_3$ )  $\delta$  -103.52 (s); HRMS (ESI) calcd for  $\text{C}_{41}\text{H}_{58}\text{F}_2\text{O}_2\text{N}$   $[\text{M}+\text{NH}_4]^+$  634.4421, found 634.4430.

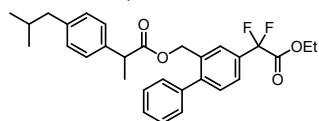

**(4-(2-ethoxy-1,1-difluoro-2-oxoethyl)-[1,1'-biphenyl]-2-yl)methyl-2-(4-isobutylphenyl)propanoate (1w)**

Colorless oil (73%, 721.5 mg);  $R_f = 0.5$  (PE/EtOAc = 50:1);  $^1\text{H}$  NMR (400 MHz,  $\text{CDCl}_3$ )  $\delta$  7.69 (s, 1H), 7.63 (d,  $J = 7.6$  Hz, 1H), 7.49 – 7.46 (m, 1H), 7.40 – 7.35 (m, 3H), 7.22 (d,  $J = 7.2$  Hz, 4H), 7.14 (d,  $J = 7.6$  Hz, 2H), 5.04 (dd,  $J = 36.8, 12.8$  Hz, 2H), 4.37 (q,  $J = 6.8$  Hz, 2H), 3.76 (q,  $J = 6.8$  Hz, 1H), 2.49 (d,  $J = 6.8$  Hz, 2H), 1.92 – 1.85 (m, 1H), 1.52 (d,  $J = 7.2$  Hz, 3H), 1.38 (t,  $J = 7.2$  Hz, 2H), 0.93 (d,  $J = 6.4$  Hz, 6H);  $^{13}\text{C}$  NMR (100 MHz,  $\text{CDCl}_3$ )  $\delta$  174.4, 164.3 (t,  $J = 34.8$  Hz), 145.0, 140.8, 139.2, 137.5, 134.1, 132.2 (t,  $J = 25.4$  Hz), 130.6, 129.5, 129.0, 128.9, 128.5, 128.0, 127.3, 126.4 (t,  $J = 6.1$  Hz), 125.4 (t,  $J = 6.3$  Hz), 113.3 (t,  $J = 250.6$  Hz), 64.4, 63.4, 45.22, 45.18, 30.3, 22.5, 18.5, 14.1;  $^{19}\text{F}$  NMR (376 MHz,  $\text{CDCl}_3$ )  $\delta$  -103.47 (s), -103.51 (s); HRMS (ESI) calcd for  $\text{C}_{30}\text{H}_{36}\text{F}_2\text{O}_4\text{N}$   $[\text{M}+\text{NH}_4]^+$  512.2607, found 512.2584.

### 3. Optimization of Reaction Conditions

#### 3.1 General Procedures for the Ethyl 2-(4-Biphenyl)-2,2-difluoroacetate **1a** with D<sub>2</sub>O

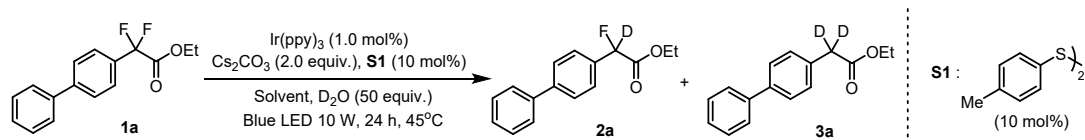

A 10 mL oven-dried Schlenk-tube equipped with a magnetic stirrer was charged with ethyl 2-(4-biphenyl)-2,2-difluoroacetate **1a** (0.20 mmol), photocatalyst, base and additive. Then the tube was evacuated and backfilled with nitrogen (three times). Subsequently, a solution of D<sub>2</sub>O (50 equiv.) in solvent (2.0 mL) was added by a syringe. The reaction mixture was stirred under the irradiation of a 10 W Blue LED ( $\lambda = 460\text{--}470$  nm; distance app. 1.0 cm from the bulb) for a specified time. After that, the resulting mixture was quenched with H<sub>2</sub>O and extracted with EtOAc (3 x 10 mL). The combined organic phase was washed with brine (10 mL), dried over Na<sub>2</sub>SO<sub>4</sub>, and concentrated in vacuo. Purification of the crude product by flash chromatography on silica gel (PE/acetone = 30:1 to 5:1) furnishes the desired product **2a/3a** as oil.

### 3.2 Optimization of the Reaction 1a, D<sub>2</sub>O<sup>a</sup>

#### Solvent

| Entry | Solvent           | Yield of <b>2a</b> (%) | Yield of <b>3a</b> (%) |
|-------|-------------------|------------------------|------------------------|
| 1     | DMSO              | trace                  | trace                  |
| 2     | DMF               | 31 (97% D)             | 4                      |
| 3     | DMAc              | trace                  | trace                  |
| 4     | NMP               | 58 (97% D)             | 6                      |
| 5     | THF               | trace                  | trace                  |
| 6     | 1,4-dioxane       | trace                  | trace                  |
| 7     | EtOAc             | trace                  | trace                  |
| 8     | MTBE              | trace                  | trace                  |
| 9     | MeNO <sub>2</sub> | trace                  | trace                  |
| 10    | toluene           | trace                  | trace                  |

<sup>a</sup>Reaction conditions: **1a** (0.2 mmol), Ir(ppy)<sub>3</sub> (1.0 mol%), Cs<sub>2</sub>CO<sub>3</sub> (2.0 equiv.), **S1** (10 mol%), Solvent (2.0 mL), D<sub>2</sub>O (50 equiv.), Blue LED 10 W, 45 °C, 24 h. Yields of isolated products and the deuterated incorporations were determined by <sup>1</sup>H NMR analysis.

Time

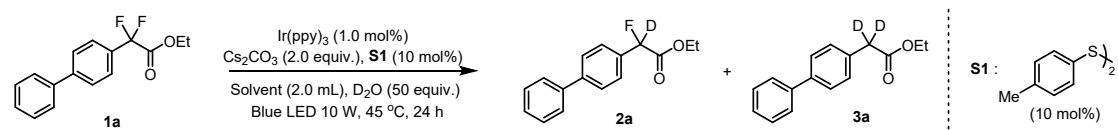

| Entry          | Time (h) | Yield of <b>2a</b> (%) | Yield of <b>3a</b> (%) |
|----------------|----------|------------------------|------------------------|
| 1 <sup>b</sup> | 8        | 12 (97% D)             | trace                  |
| 2 <sup>b</sup> | 16       | 20 (97% D)             | 2                      |
| 3 <sup>b</sup> | 24       | 31 (97% D)             | 4                      |
| 4 <sup>b</sup> | 32       | 31 (97% D)             | 4                      |
| 5 <sup>c</sup> | 8        | 9 (97% D)              | trace                  |
| 6 <sup>c</sup> | 16       | 47 (97% D)             | 5                      |
| 7 <sup>c</sup> | 24       | 58 (97% D)             | 6                      |
| 8 <sup>c</sup> | 32       | 59 (97% D)             | 6                      |

<sup>a</sup>Reaction conditions: **1a** (0.2 mmol), Ir(ppy)<sub>3</sub> (1.0 mol%), Cs<sub>2</sub>CO<sub>3</sub> (2.0 equiv.), **S1** (10 mol%), D<sub>2</sub>O (50 equiv.), Blue LED 10 W, 45 °C, x h, Yields of isolated products and the deuterated incorporations were determined by <sup>1</sup>H NMR analysis. <sup>b</sup>DMF was used as solvent (2.0 mL), <sup>c</sup>NMP was used as solvent (2.0 mL).

## Photocatalyst

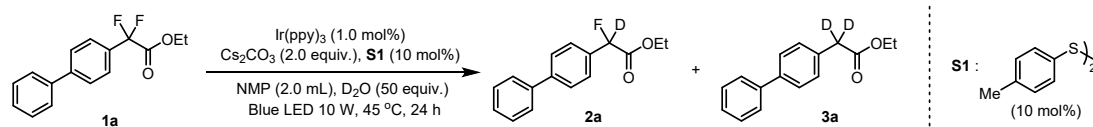

| Entry | PC                 | Yield of <b>2a</b> (%) | Yield of <b>3a</b> (%) |
|-------|--------------------|------------------------|------------------------|
| 1     | $\text{Ir(ppy)}_3$ | 58 (97% D)             | 6                      |
| 2     | 4CzIPN             | 21 (97% D)             | trace                  |
| 3     | Rhodamine B        | 0                      | 0                      |
| 4     | Eosin Y            | 0                      | 0                      |
| 5     | Rose Bengale       | 0                      | 0                      |
| 6     | Methlyene Blue     | 0                      | 0                      |

<sup>a</sup>Reaction conditions: **1a** (0.2 mmol), PC (1.0 mol%),  $\text{Cs}_2\text{CO}_3$  (2.0 equiv.), **S1** (10 mol%),  $\text{D}_2\text{O}$  (50 equiv.), NMP (2.0 mL), Blue LED 10 W, 45 °C, 24 h. Yields of isolated products and the deuterated incorporations were determined by  $^1\text{H}$  NMR analysis.

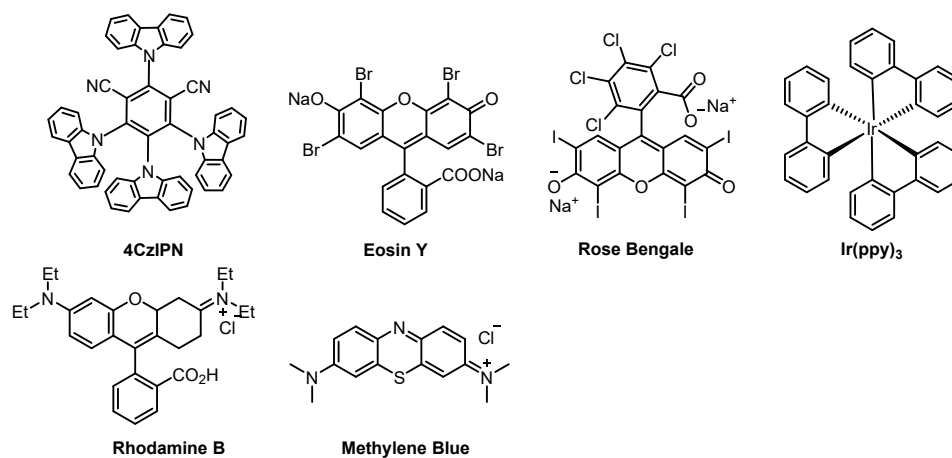

Base

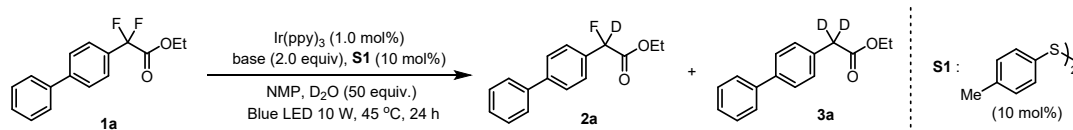

| Entry             | Base                            | Yield of <b>2a</b> (%) | Yield of <b>3a</b> (%) |
|-------------------|---------------------------------|------------------------|------------------------|
| 1                 | Li <sub>2</sub> CO <sub>3</sub> | 21 (97% D)             | trace                  |
| 2                 | Na <sub>2</sub> CO <sub>3</sub> | 19 (97% D)             | trace                  |
| 3                 | K <sub>2</sub> CO <sub>3</sub>  | 25 (97% D)             | 3                      |
| 4                 | Cs <sub>2</sub> CO <sub>3</sub> | 58 (97% D)             | 6                      |
| 5                 | NaOAc                           | trace                  | trace                  |
| 6                 | KOAc                            | trace                  | trace                  |
| 7                 | Et <sub>3</sub> N               | 0                      | trace                  |
| 8                 | DBU                             | trace                  | 0                      |
| 9 <sup>b</sup>    | Cs <sub>2</sub> CO <sub>3</sub> | 3                      | 86 (98% D)             |
| 10 <sup>b,c</sup> | Cs <sub>2</sub> CO <sub>3</sub> | 2                      | 86 (98% D)             |

<sup>a</sup>Reaction conditions: **1a** (0.2 mmol), Ir(ppy)<sub>3</sub> (1.0 mol%), Base (2.0 equiv.), **S1** (10 mol%), D<sub>2</sub>O (50 equiv.), NMP (2.0 mL), Blue LED 10 W, 45 °C, 24 h. Yields of isolated products and the deuterated incorporations were determined by <sup>1</sup>H NMR analysis. <sup>b</sup>extra Et<sub>3</sub>N (3.0 equiv.) was used. <sup>c</sup>DMF (2.0 mL) was used as solvent.



*Equiv. of Cs<sub>2</sub>CO<sub>3</sub>*

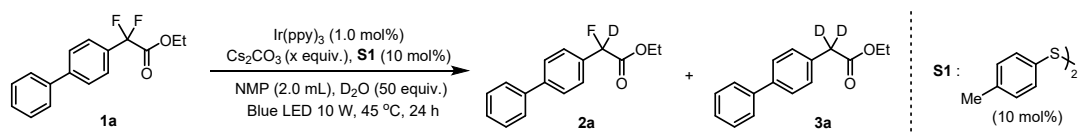

| Entry | Cs <sub>2</sub> CO <sub>3</sub> (x equiv.) | Yield of <b>2a</b> (%) | Yield of <b>3a</b> (%) |
|-------|--------------------------------------------|------------------------|------------------------|
| 1     | /                                          | 0                      | 0                      |
| 2     | 0.5                                        | 12 (97% D)             | trace                  |
| 3     | 1                                          | 42 (97% D)             | 3                      |
| 4     | 2                                          | 58 (97% D)             | 6                      |
| 5     | 3                                          | 59 (97% D)             | 6                      |

<sup>a</sup>Reaction conditions: **1a** (0.2 mmol), Ir(ppy)<sub>3</sub> (1.0 mol%), Cs<sub>2</sub>CO<sub>3</sub> (x equiv.), **S1** (10 mol%), D<sub>2</sub>O (50 equiv.), NMP (2.0 mL), Blue LED 10 W, 45 °C, 24 h. Yields of isolated products and the deuterated incorporations were determined by <sup>1</sup>H NMR analysis.

*D*-transfer mediator

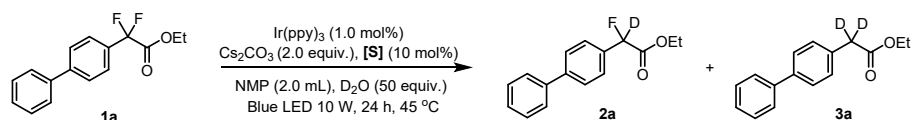

| Entry          | [S]       | Yield of <b>2a</b> (%) | Yield of <b>3a</b> (%) |
|----------------|-----------|------------------------|------------------------|
| 1              | /         | 0                      | 0                      |
| 2              | <b>S1</b> | 58 (97% D)             | 6                      |
| 3              | <b>S2</b> | 0                      | trace                  |
| 4              | <b>S3</b> | trace                  | trace                  |
| 5              | <b>S4</b> | trace                  | trace                  |
| 6              | <b>S5</b> | 50 (97% D)             | 5                      |
| 7              | <b>S6</b> | 32 (90% D)             | 3                      |
| 8 <sup>b</sup> | <b>S1</b> | 52 (97% D)             | 5                      |
| 9 <sup>c</sup> | <b>S1</b> | 58 (97% D)             | 6                      |

<sup>a</sup>Reaction conditions: **1a** (0.2 mmol), Ir(ppy)<sub>3</sub> (1.0 mol%), Cs<sub>2</sub>CO<sub>3</sub> (2.0 equiv.), [S] (10 mol%), D<sub>2</sub>O (50 equiv.), NMP (2.0 mL), Blue LED 10 W, 45 °C, 24 h. Yields of isolated products and the deuterated incorporations were determined by <sup>1</sup>H NMR analysis. <sup>b</sup>5 mol% of **S1** was used. <sup>c</sup>15 mol% of **S1** was used.

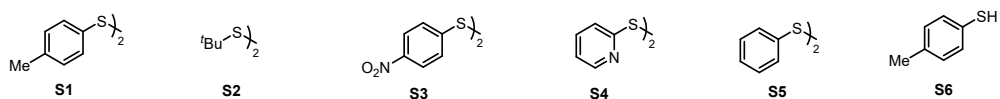

### D-Source

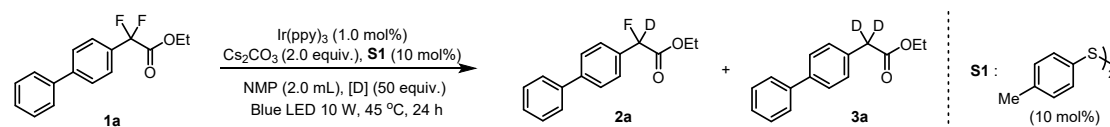

| Entry | [D]                    | Yield of <b>2a</b> (%) | Yield of <b>3a</b> (%) |
|-------|------------------------|------------------------|------------------------|
| 1     | $\text{D}_2\text{O}$   | 58 (97% D)             | 6                      |
| 2     | MeOD                   | 9                      | trace                  |
| 3     | acetone- $d_6$         | 7                      | trace                  |
| 4     | $\text{CD}_3\text{CN}$ | trace                  | trace                  |
| 5     | $\text{DMSO-}d_6$      | trace                  | trace                  |

<sup>a</sup>Reaction conditions: **1a** (0.2 mmol),  $\text{Ir(ppy)}_3$  (1.0 mol%),  $\text{Cs}_2\text{CO}_3$  (2.0 equiv.), **S1** (10 mol%), [D] (50 equiv.), NMP (2.0 mL), Blue LED 10 W, 45 °C, 24 h. Yields of isolated products and the deuterated incorporations were determined by  $^1\text{H}$  NMR analysis.

### Equiv. of $\text{D}_2\text{O}$

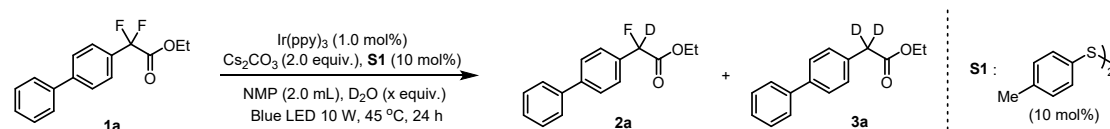

| Entry | $\text{D}_2\text{O}$ (x equiv.) | Yield of <b>2a</b> (%) | Yield of <b>3a</b> (%) |
|-------|---------------------------------|------------------------|------------------------|
| 1     | 20                              | 32 (86% D)             | 3                      |
| 2     | 40                              | 63 (97% D)             | 6                      |
| 3     | 50                              | 58 (97% D)             | 6                      |
| 4     | 80                              | 43 (97% D)             | 4                      |
| 5     | 120                             | 39 (97% D)             | 3                      |

<sup>a</sup>Reaction conditions: **1a** (0.2 mmol),  $\text{Ir(ppy)}_3$  (1.0 mol%),  $\text{Cs}_2\text{CO}_3$  (2.0 equiv.), **S1** (10 mol%),  $\text{D}_2\text{O}$  (x equiv.), NMP (2.0 mL), Blue LED 10 W, 45 °C, 24 h. Yields of isolated products and the deuterated incorporations were determined by  $^1\text{H}$  NMR analysis.

### Temperature

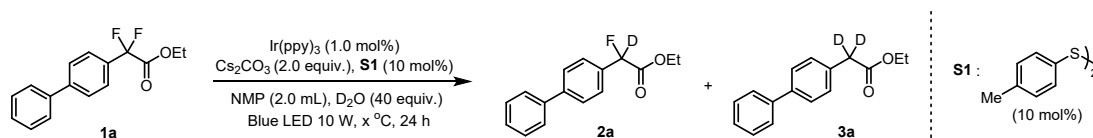

| Entry | x °C | Yield of <b>2a</b> (%) | Yield of <b>2a</b> (%) |
|-------|------|------------------------|------------------------|
| 1     | 45   | 63 (97% D)             | 6                      |
| 2     | 35   | 69 (97% D)             | 5                      |
| 3     | 25   | 78 (97% D)             | 3                      |

<sup>a</sup>Reaction conditions: **1a** (0.2 mmol), Ir(ppy)<sub>3</sub> (1.0 mol%), Cs<sub>2</sub>CO<sub>3</sub> (2.0 equiv.), **S1** (10 mol%), D<sub>2</sub>O (40 equiv.), NMP (2.0 mL), Blue LED 10 W, x °C, 24 h. Yields of isolated products and the deuterated incorporations were determined by <sup>1</sup>H NMR analysis.

### Time

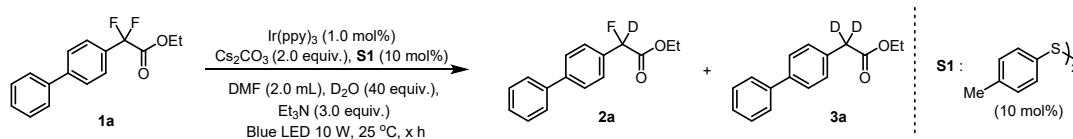

| Entry          | Time | Yield of <b>2a</b> (%) | Yield of <b>3a</b> (%) |
|----------------|------|------------------------|------------------------|
| 1              | 1    | 16 (97% D)             | 29 (98% D)             |
| 2              | 4    | 31 (97% D)             | 47 (98% D)             |
| 3              | 8    | 32 (97% D)             | 55 (98% D)             |
| 4              | 12   | 2                      | 86 (98% D)             |
| 5              | 16   | 2                      | 86 (98% D)             |
| 6              | 20   | 2                      | 86 (98% D)             |
| 7              | 24   | 2                      | 86 (98% D)             |
| 8 <sup>b</sup> | 12   | 2                      | 81 (98% D)             |
| 9 <sup>c</sup> | 12   | 3                      | 86 (98% D)             |

<sup>a</sup>Reaction conditions: **1a** (0.2 mmol), Ir(ppy)<sub>3</sub> (1.0 mol%), Cs<sub>2</sub>CO<sub>3</sub> (2.0 equiv.), **S1** (10 mol%), D<sub>2</sub>O (40 equiv.), DMF (2.0 mL), Et<sub>3</sub>N (3.0 equiv.), Blue LED 10 W, 25 °C, 24 h. Yields of isolated products and the deuterated incorporations were determined by <sup>1</sup>H NMR analysis. <sup>b</sup>2.0 equiv. of Et<sub>3</sub>N was used, <sup>c</sup>4.0 equiv. of Et<sub>3</sub>N

was used.

### Light Source

### Monodeuterodefluorination

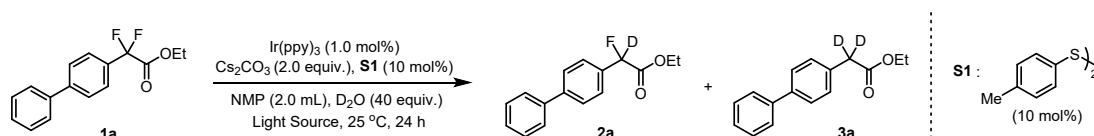

| Entry | Light Source    | Yield of <b>2a</b> (%) | Yield of <b>3a</b> (%) |
|-------|-----------------|------------------------|------------------------|
| 1     | Blue LED (5 W)  | 69 (97% D)             | 2                      |
| 2     | Blue LED (10 W) | 78 (97% D)             | 3                      |
| 3     | Blue LED (15 W) | 78 (97% D)             | 5                      |
| 4     | CFL (15 W)      | 0 <sup>b</sup>         | 0                      |

<sup>a</sup>Reaction conditions: **1a** (0.2 mmol), Ir(ppy)<sub>3</sub> (1.0 mol%), Cs<sub>2</sub>CO<sub>3</sub> (2.0 equiv.), **S1** (10 mol%), D<sub>2</sub>O (40 equiv.), NMP (2.0 mL), Light Source, 25 °C, 24 h. Yields of isolated products and the deuterated incorporations were determined by <sup>1</sup>H NMR analysis. <sup>b</sup>92% of **1a** was recovered.

### Dideuterodefluorination

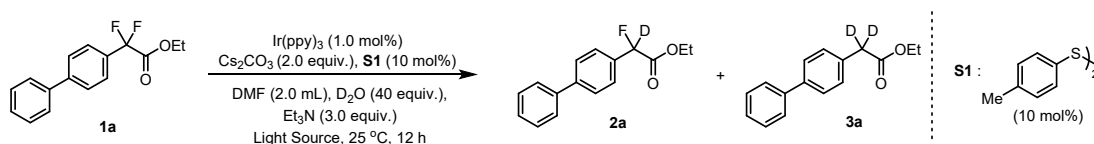

| Entry | Light Source    | Yield of <b>2a</b> (%) | Yield of <b>3a</b> (%) |
|-------|-----------------|------------------------|------------------------|
| 1     | Blue LED (5 W)  | 2                      | 81 (98% D)             |
| 2     | Blue LED (10 W) | 2                      | 86 (98% D)             |
| 3     | Blue LED (15 W) | 4                      | 85 (98% D)             |
| 4     | CFL (15 W)      | 0                      | 0 <sup>b</sup>         |

<sup>a</sup>Reaction conditions: **1a** (0.2 mmol), Ir(ppy)<sub>3</sub> (1.0 mol%), Cs<sub>2</sub>CO<sub>3</sub> (2.0 equiv.), **S1** (10 mol%), D<sub>2</sub>O (40 equiv.), Et<sub>3</sub>N (2.0 equiv.), NMP (2.0 mL), Light Source, 25 °C, 12 h. Yields of isolated products and the deuterated incorporations were determined by <sup>1</sup>H NMR analysis. <sup>b</sup>90% of **1a** was recovered.

## 4. Representative Procedure for the Deutrodefluorination of **1** with D<sub>2</sub>O

### 4.1 Monodeuterodefluorination reaction

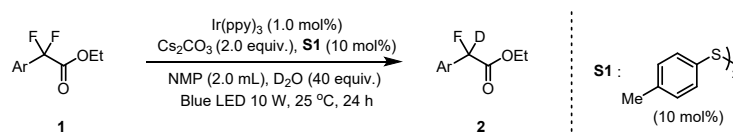

A 10 mL oven-dried Schlenk-tube equipped with a magnetic stirrer was charged with ethyl  $\alpha,\alpha$ -difluoroaryl acetate derivatives **1** (0.20 mmol), Ir(ppy)<sub>3</sub> (1.0 mol%), Cs<sub>2</sub>CO<sub>3</sub> (2.0 equiv.), **S1** (10 mol%). Then, the tube was evacuated and backfilled with nitrogen (three times). Subsequently, a solution of D<sub>2</sub>O (40 equiv.) in NMP (2.0 mL) was added by a syringe. The reaction mixture was stirred under the irradiation of a 10 W Blue LED ( $\lambda = 460\text{--}470$  nm; distance app. 1.0 cm from the bulb) for 24 h. After that, the resulting mixture was quenched with H<sub>2</sub>O and extracted with EtOAc (3 x 10 mL). The combined organic phase was washed with brine (10 mL), dried over Na<sub>2</sub>SO<sub>4</sub>, and concentrated in vacuo. Purification of the crude product by flash chromatography on silica gel (PE/acetone: 30:1 to 20:1) furnishes the desired products **2**.

### 4.2 Dideuterodefluorination reaction

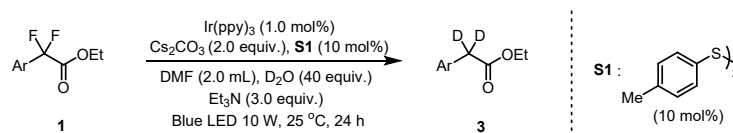

A 10 mL oven-dried Schlenk-tube equipped with a magnetic stirrer was charged with ethyl  $\alpha,\alpha$ -difluoroaryl acetate derivatives **1** (0.20 mmol), Ir(ppy)<sub>3</sub> (1.0 mol%), Cs<sub>2</sub>CO<sub>3</sub> (2.0 equiv.), Et<sub>3</sub>N (3.0 equiv.), **S1** (10 mol%). Then, the tube was evacuated and backfilled with nitrogen (three times). Subsequently, a solution of D<sub>2</sub>O (40 equiv.) in DMF (2.0 mL) was added by a syringe. The reaction mixture was stirred under the irradiation of a 10 W Blue LED ( $\lambda = 460\text{--}470$  nm; distance app. 1.0 cm from the bulb) for 24 h. After that, the resulting mixture was quenched with H<sub>2</sub>O and extracted with EtOAc (3 x 10 mL). The combined organic phase was washed with brine (10 mL), dried over Na<sub>2</sub>SO<sub>4</sub>, and concentrated in vacuo. Purification of the crude product by flash chromatography on silica gel (PE/acetone: 30:1 to 20:1) furnishes the desired products **3**.

## The Visible-Light Photoredox Catalysis Experimental Setup

(photographed by author Li-Na Guo)

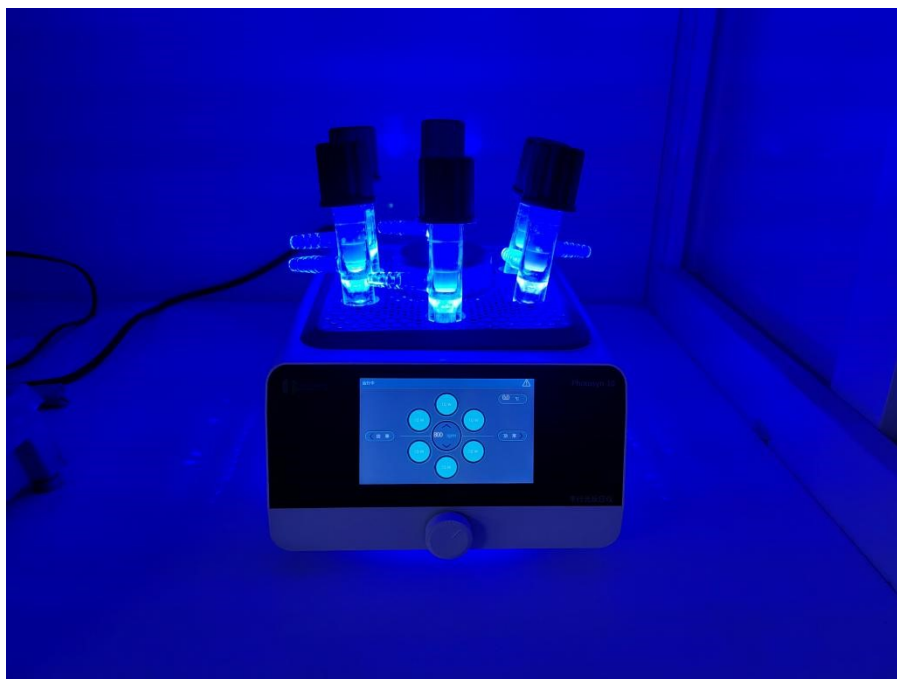

### 4.3 Applied Research

#### Large Scale Synthesis of **2a** and **3a**

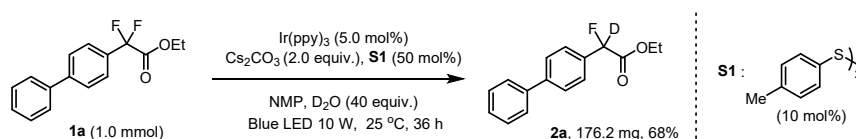

A 10 mL oven-dried Schlenk-tube equipped with a magnetic stirrer was charged with 2-(4-Biphenyl)-2,2-difluoroacetate **1a** (1.0 mmol), Ir(ppy)<sub>3</sub> (5.0 mol%), Cs<sub>2</sub>CO<sub>3</sub> (2.0 equiv.), **S1** (50 mol%). Then the tube was evacuated and backfilled with nitrogen (three times). Subsequently, a solution of D<sub>2</sub>O (40 equiv.) in NMP (10 mL) was added by a syringe. The reaction mixture was stirred under the irradiation of a 10 W Blue LED ( $\lambda = 460\text{--}470$  nm; distance app. 1.0 cm from the bulb) for 36 h. After that, the resulting mixture was quenched with H<sub>2</sub>O and extracted with EtOAc (3 x 10 mL). The combined organic phase was washed with brine (10 mL), dried over Na<sub>2</sub>SO<sub>4</sub>, and concentrated in vacuo. Purification of the crude product by flash chromatography on silica gel (PE/acetone = 30:1) furnishes the desired product **2a**.

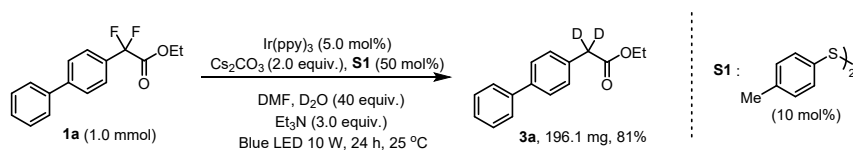

A 10 mL oven-dried Schlenk-tube equipped with a magnetic stirrer was charged with 2-(4-Biphenyl)-2,2-difluoroacetate **1a** (1.0 mmol), Ir(ppy)<sub>3</sub> (5.0 mol%), Cs<sub>2</sub>CO<sub>3</sub> (2.0 equiv.), Et<sub>3</sub>N (3.0 equiv.) **S1** (50 mol%). Then the tube was evacuated and backfilled with nitrogen (three times). Subsequently, a solution of D<sub>2</sub>O (40 equiv.) in DMF (10 mL) was added by a syringe. The reaction mixture was stirred under the irradiation of a 10 W Blue LED ( $\lambda = 460\text{--}470$  nm; distance app. 1.0 cm from the bulb) for 24 h. After that, the resulting mixture was quenched with H<sub>2</sub>O and extracted with EtOAc (3 x 10 mL). The combined organic phase was washed with brine (10 mL), dried over Na<sub>2</sub>SO<sub>4</sub>, and concentrated in vacuo. Purification of the crude product by flash chromatography on silica gel (PE/acetone = 30:1) furnishes the desired product **3a**.



### Selective hydrodefluorination of **1a**

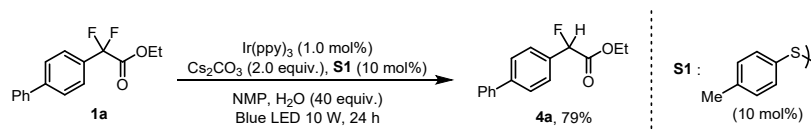

A 10 mL oven-dried Schlenk-tube equipped with a magnetic stirrer was charged with 2-(4-Biphenyl)-2,2-difluoroacetate **1a** (0.2 mmol), Ir(ppy)<sub>3</sub> (1.0 mol%), Cs<sub>2</sub>CO<sub>3</sub> (2.0 equiv.), **S1** (10 mol%). Then the tube was evacuated and backfilled with nitrogen (three times). Subsequently, a solution of H<sub>2</sub>O (40 equiv.) in NMP (2.0 mL) was added by a syringe. The reaction mixture was stirred under the irradiation of a 10 W Blue LED ( $\lambda = 460\text{--}470$  nm; distance app. 1.0 cm from the bulb) for 24 h. After that, the resulting mixture was quenched with H<sub>2</sub>O and extracted with EtOAc (3 x 10 mL). The combined organic phase was washed with brine (10 mL), dried over Na<sub>2</sub>SO<sub>4</sub>, and concentrated in vacuo. Purification of the crude product by flash chromatography on silica gel (PE/acetone = 30:1) furnishes the desired product **4a**.

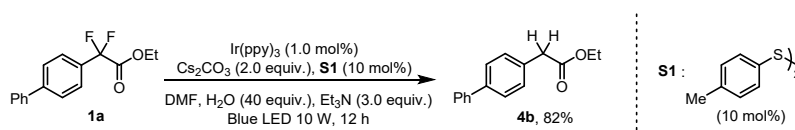

A 10 mL oven-dried Schlenk-tube equipped with a magnetic stirrer was charged with 2-(4-Biphenyl)-2,2-difluoroacetate **1a** (0.2 mmol), Ir(ppy)<sub>3</sub> (1.0 mol%), Cs<sub>2</sub>CO<sub>3</sub> (2.0 equiv.), Et<sub>3</sub>N (3.0 equiv.) **S1** (10 mol%). Then the tube was evacuated and backfilled with nitrogen (three times). Subsequently, a solution of D<sub>2</sub>O (40 equiv.) in DMF (2.0 mL) was added by a syringe. The reaction mixture was stirred under the irradiation of a 10 W Blue LED ( $\lambda = 460\text{--}470$  nm; distance app. 1.0 cm from the bulb) for 24 h. After that, the resulting mixture was quenched with H<sub>2</sub>O and extracted with EtOAc (3 x 10 mL). The combined organic phase was washed with brine (10 mL), dried over Na<sub>2</sub>SO<sub>4</sub>, and concentrated in vacuo. Purification of the crude product by flash chromatography on silica gel (PE/acetone = 30:1) furnishes the desired product **4b**.

### Hydrolysis of **2a** and **3a**

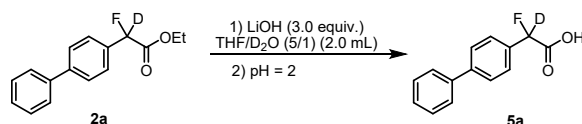

In a 50 mL round bottom flask, **2a** (0.2 mmol, 1.0 equiv.) was added to a mixture of THF/D<sub>2</sub>O (5/1, 2.0 mL) and LiOH (3.0 equiv.) and stirred for 10 h at room temperature. The reaction was then poured into 1 M HCl aq. to acidify to pH = 2, and the aqueous phase was extracted with EtOAc (3 × 10 mL), washed with brine (10 mL), dried over Na<sub>2</sub>SO<sub>4</sub> and concentrated in vacuo. The residue was purified by column chromatography on silica gel (PE/EtOAc = 5:1) to afford product **5a**.

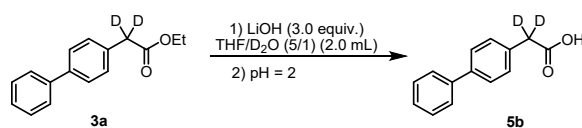

In a 50 mL round bottom flask, **3a** (0.2 mmol, 1.0 equiv.) was added to a mixture of THF/D<sub>2</sub>O (5/1, 2.0 mL) and LiOH (3.0 equiv.) and stirred for 10 h at room temperature. The reaction was then poured into 1 M HCl aq. to acidify to pH = 2, and the aqueous phase was extracted with EtOAc (3 × 10 mL), washed with brine (10 mL), dried over Na<sub>2</sub>SO<sub>4</sub> and concentrated in vacuo. The residue was purified by column chromatography on silica gel (PE/EtOAc = 5:1) to afford product **5b**.

### Esterification of **5a**

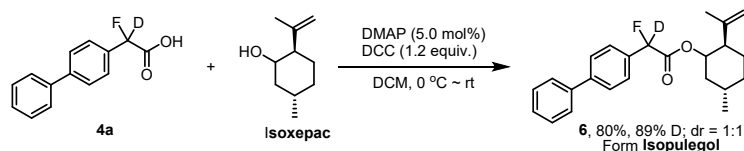

To a solution of **4a** (0.1 mmol), Isoxepac (0.12 mmol), and DMAP (5.0 mol%) in DCM (1.0 mL) at 0 °C was added DCC (0.24 mmol) in one portion. A precipitate began to form almost immediately. The reaction was stirred at 0 °C for 10 min and then warmed to room temperature. After completion as detected by TLC, the reaction was then diluted with pentane (5.0 mL) and filtered through a short plug of silica. The aqueous layer was extracted with EtOAc, the combined organic layer was dried over Na<sub>2</sub>SO<sub>4</sub>, filtered and concentrated under the reduced pressure. The residue was purified by column chromatography on silica gel (PE/EtOAc = 10:1) to afford product **6**.

### Reduction and further esterification of **2a**

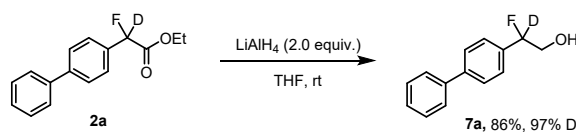

To a solution of **2a** (0.2 mmol, 1.0 equiv.) in THF (2.0 mL) was added lithium aluminium tetrahydride (0.42 mmol, 2.1 equiv.) at room temperature. The reaction mixture was stirred at room temperature for 8 h. After completion as detected by TLC, the reaction was quenched with saturated  $\text{NH}_4\text{Cl}$  aqueous solution. The aqueous layer was extracted with EtOAc, the combined organic layer was dried over  $\text{Na}_2\text{SO}_4$ , filtered and concentrated under the reduced pressure. The residue was purified by column chromatography on silica gel (PE/EtOAc = 5:1) to afford product **7a**.

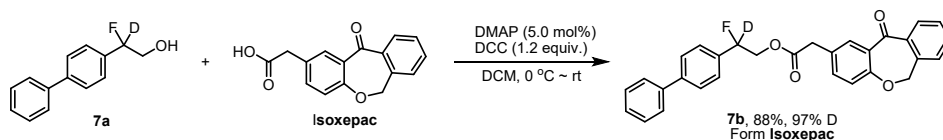

To a solution of **7a** (0.1 mmol), Isoxepac (0.12 mmol), and DMAP (5.0 mol%) in DCM (1.0 mL) at 0 °C was added DCC (0.24 mmol) in one portion. A precipitate began to form almost immediately. The reaction was stirred at 0 °C for 10 min and then warmed to room temperature. After completion as detected by TLC, the reaction was then diluted with pentane (5.0 mL) and filtered through a short plug of silica. The aqueous layer was extracted with EtOAc, the combined organic layer was dried over  $\text{Na}_2\text{SO}_4$ , filtered and concentrated under the reduced pressure. The residue was purified by column chromatography on silica gel (PE/EtOAc = 10:1) to afford product **7b**.

## 5. Mechanism Studies

### 5.1 Radical Inhibiting Experiments

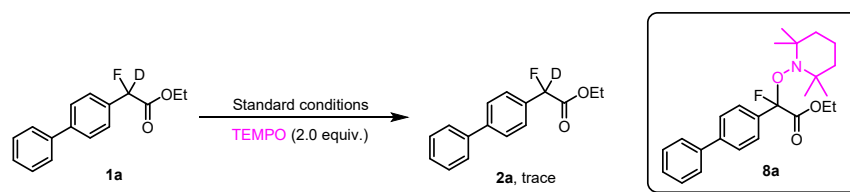

A 10 mL oven-dried Schlenk-tube equipped with a magnetic stirrer was charged with **1a** (0.2 mmol), Ir(ppy)<sub>3</sub> (1.0 mol%), Cs<sub>2</sub>CO<sub>3</sub> (2.0 equiv.), **S1** (10 mol%) and TEMPO (0.4 mmol, 2.0 equiv.). Then the tube was evacuated and backfilled with nitrogen (three times). Subsequently, a solution of D<sub>2</sub>O (40 equiv.) in NMP (2.0 mL) was added by a syringe. The reaction mixture was stirred under the irradiation of a 10 W Blue LED ( $\lambda = 460\text{--}470$  nm; distance app. 1.0 cm from the bulb) for 24 h.

After that, it was found that a trace amount of **2a** was observed, along with the TEMPO adduct **8a** was detected by LC-HRMS (HRMS (ESI) calcd for C<sub>25</sub>H<sub>32</sub>FNO<sub>3</sub>Na [M+Na]<sup>+</sup> 436.2258, found 436.2274). This result indicates that a radical intermediate might be involved in this transformation. The results are shown in Figure S1.

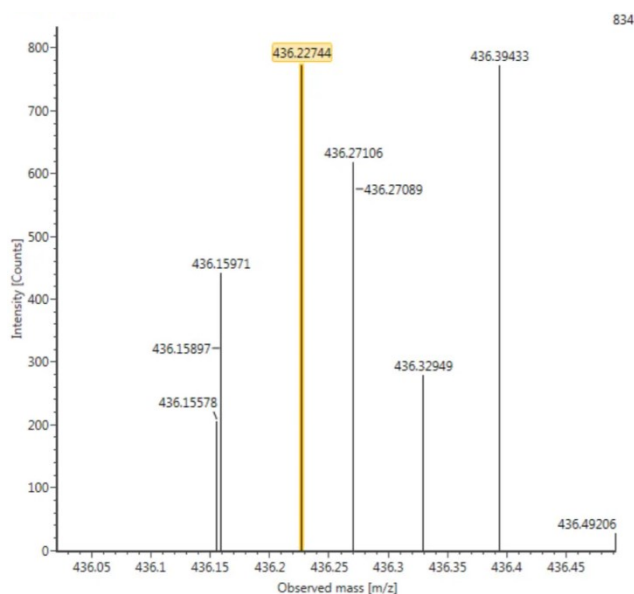

Figure S1. LC-HRMS Spectra of **7a**

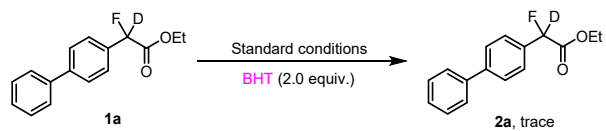

Similarly, when 2.0 equiv. of BHT was subjected into the reaction of **1a** with D<sub>2</sub>O under the standard conditions, only a trace amount of **2a** was observed. This result also indicates that a radical pathway might be involved in this transformation.

## 5.2 EPR Experiment

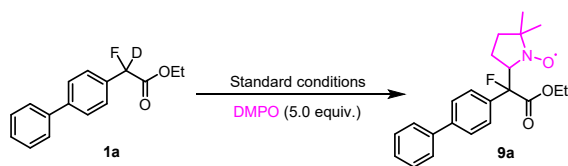

A 10 mL oven-dried Schlenk-tube equipped with a magnetic stirrer was charged with 2-(4-Biphenyl)-2,2-difluoroacetate **1a** (0.2 mmol), Ir(ppy)<sub>3</sub> (1.0 mol%), Cs<sub>2</sub>CO<sub>3</sub> (2.0 equiv.), S1 (10 mol%) and DMPO (5.0 equiv.). Then the tube was evacuated and backfilled with nitrogen (three times). Subsequently, a solution of D<sub>2</sub>O (40 equiv.) in NMP (2.0 mL) was added by a syringe. The reaction mixture was stirred under the irradiation of a 10 W Blue LED ( $\lambda = 460\text{--}470$  nm; distance app. 1.0 cm from the bulb) for 24 h.

When 5.0 equiv. of DMPO was subjected into the reaction of **1a** with D<sub>2</sub>O under the standard conditions. It was found that only a trace amount of **2a** was observed, along with the DMPO adduct **9a** was detected by EPR and LC-HRMS (HRMS (ESI) calcd for C<sub>25</sub>H<sub>32</sub>FNO<sub>3</sub>Na [M]<sup>+</sup> 370.1813, found 370.1816). This result indicates that a radical intermediate might be involved in this transformation. The results are shown in Figure S2 and Figure S3.

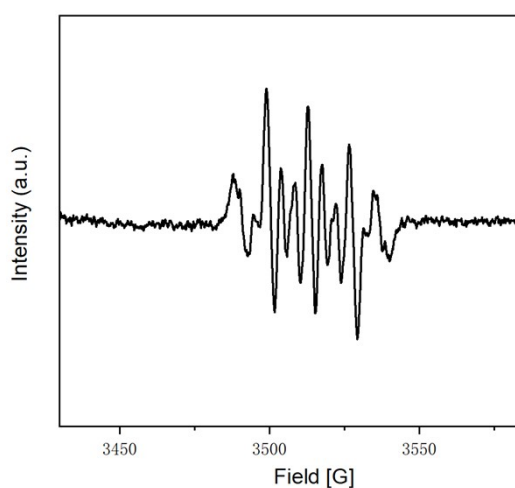

Figure S2. EPR Spectra of **8a**

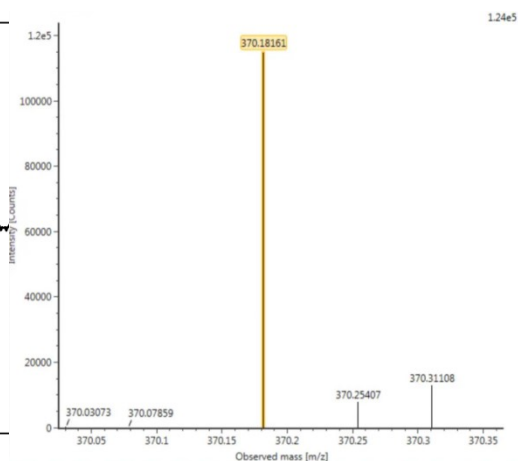

Figure S3. LC-HRMS Spectra of **8a**

### 5.3 Transformation of **1a** to **4a/5a** without Ir(ppy)<sub>3</sub>

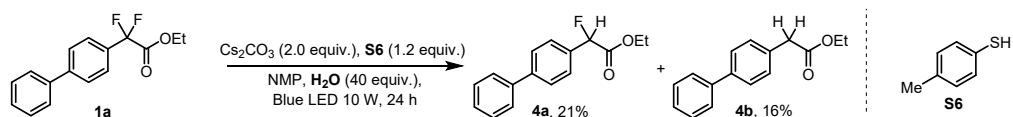

A 10 mL oven-dried Schlenk-tube equipped with a magnetic stirrer was charged with **1a** (0.2 mmol),  $\text{Cs}_2\text{CO}_3$  (2.0 equiv.), **S6** (1.2 equiv.). Then the tube was evacuated and backfilled with nitrogen (three times). Subsequently, a solution of  $\text{H}_2\text{O}$  (40 equiv.) in NMP (2.0 mL) was added by a syringe. The reaction mixture was stirred under the irradiation of a 10 W Blue LED ( $\lambda = 460\text{--}470$  nm; distance app. 1.0 cm from the bulb) for 24 h. After that, the resulting mixture was quenched with  $\text{H}_2\text{O}$  and extracted with EtOAc (3 x 10 mL). The combined organic phase was washed with brine (10 mL), dried over  $\text{Na}_2\text{SO}_4$ , and concentrated in vacuo. Purification of the crude product by flash chromatography on silica gel (PE/acetone: 30:1) furnishes the desired products **4a** and **4b**.

## 5.4 Stern-Volmer Fluorescence Quenching Experiments

To a solution of Ir(ppy)<sub>3</sub> in anhydrous, N<sub>2</sub>-saturated NMP (5 × 10<sup>-4</sup> mol/L) in a quartz cuvette, different amounts of **S1** was added, and the resulting changes in fluorescence intensity (concentration of **S1**: 5 × 10<sup>-5</sup> mol/L, 10 × 10<sup>-5</sup> mol/L, 15 × 10<sup>-5</sup> mol/L, 20 × 10<sup>-5</sup> mol/L, 25 × 10<sup>-5</sup> mol/L) were collected. The emission intensity at 536 nm was collected with excited wavelength of 460 nm. The results are shown in Figure S4.

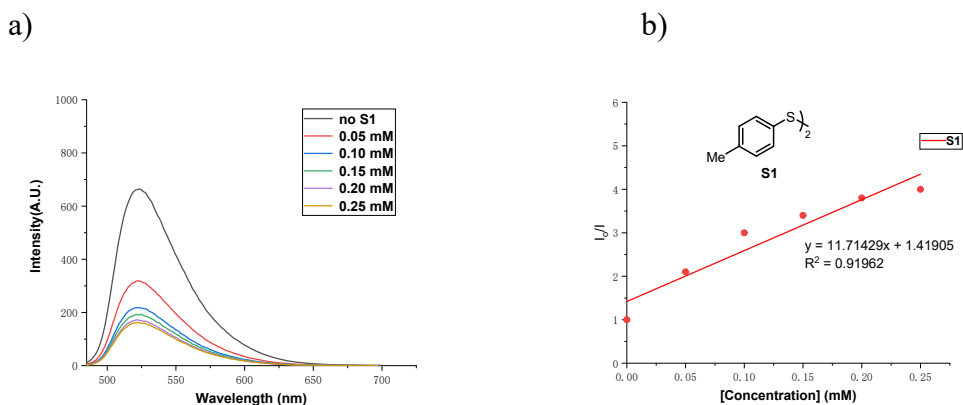

**Figure S4.** (a) The fluorescence emission spectra of Ir(ppy)<sub>3</sub> with different concentration of **1a** added. (b) The Stern–Volmer emission quenching studies of **1a**. I<sub>0</sub> is the inherent fluorescence intensity of Ir(ppy)<sub>3</sub>. I is the fluorescence intensity of Ir(ppy)<sub>3</sub> in the presence of **1a**.



To a solution of **S6** anion (freshly prepared in situ by the deprotonation of **S6** with NaOH) in anhydrous,  $N_2$ -saturated NMP ( $5 \times 10^{-4}$  mol/L) in a quartz cuvette, different amounts of **1a** was added, and the resulting changes in fluorescence intensity (concentration of **1a** anion:  $5 \times 10^{-5}$  mol/L,  $10 \times 10^{-5}$  mol/L,  $15 \times 10^{-5}$  mol/L,  $20 \times 10^{-5}$  mol/L,  $25 \times 10^{-5}$  mol/L) were collected. The emission intensity at 536 nm was collected with excited wavelength of 460 nm. The results are shown in Figure S5.

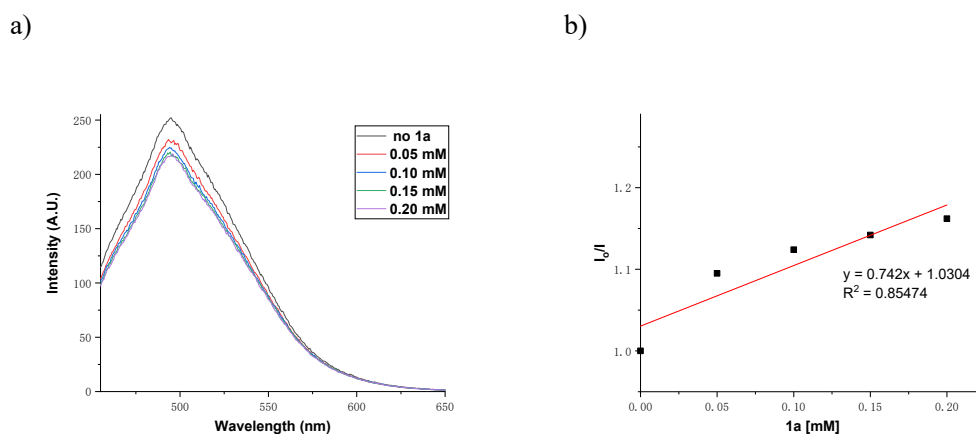

**Figure S5.** (a) The fluorescence emission spectra of **S6** anion with different concentration of **1a** added. (b) The Stern–Volmer emission quenching studies of **1a**.  $I_0$  is the inherent fluorescence intensity of **S6** anion.  $I$  is the fluorescence intensity of **S6** anion in the presence of **1a**.

### 5.5 Light On-Off Experiments

To further examine the impact of light, we conducted the reaction of **1a** with  $D_2O$  under alternating periods of irradiation and darkness. The results are shown in Figure S6.

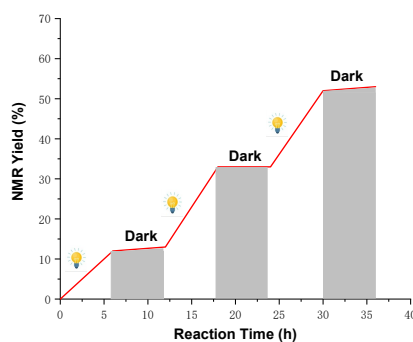

**Figure S6.** Yield of **2a** with or without light irradiation

The results of light on-off experiments indicated that the reaction proceeded only

under the irradiation of light. Suggesting the reaction that proceeded via a catalytic process rather than a radical chain process.

## 5.6 Cyclic Voltammetry and UV/vis Absorption Experiments

Cyclic voltammetry was performed in a three-electrode cell connected to a Schlenk line at room temperature. A cyclic voltammograms in **1a** or **2a** by using glassy carbon as the working electrode, Pt wire as the counter electrode and Ag/AgCl as the reference electrode. The scan rate was 50 mV/s, ranging from 0 V to -4.0 V *n*Bu<sub>4</sub>NBF<sub>4</sub> (0.1 M) was used as the electrolyte, MeCN or DMF as the solvent.

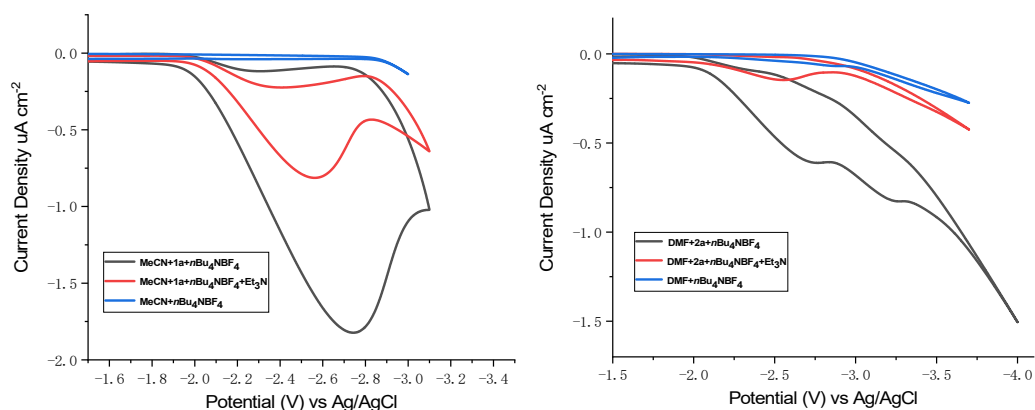

Figure S7 Cyclic Voltammetry Experiments

The results of Cyclic voltammetry experiments indicated that the role of Et<sub>3</sub>N in the reaction, adding Et<sub>3</sub>N change the reduction potential of **1a** from  $E_{\text{red } p/2} = -2.28$  V vs. SCE to  $E_{\text{red } p/2} = -2.22$  V vs. SCE. Furthermore, Changing the reduction potential of **2a** from  $E_{\text{red } p/2} = -2.21$  V vs. SCE to  $E_{\text{red } p/2} = -2.17$  V vs. SCE. The addition of Et<sub>3</sub>N to the reaction substantially changed the CV profile of the **1a** or **2a** and made them easier to be reduced. The results are shown in Figure S7.

Cyclic voltammetry was performed in a three-electrode cell connected to a Schlenk line at room temperature. A cyclic voltammograms in **S6** anion (generated in situ by the deprotonation of the **S6** with 1.2 equiv. NaOH) by using glassy carbon as the working electrode, Pt wire as the counter electrode and Ag/AgCl as the reference electrode. The scan rate was 50 mV/s, ranging from 0 V to -4.0 V *n*Bu<sub>4</sub>NPF<sub>6</sub> (0.1M) was used as the electrolyte, dry MeCN as the solvent. The results are shown in Figure S8 and Figure S9.

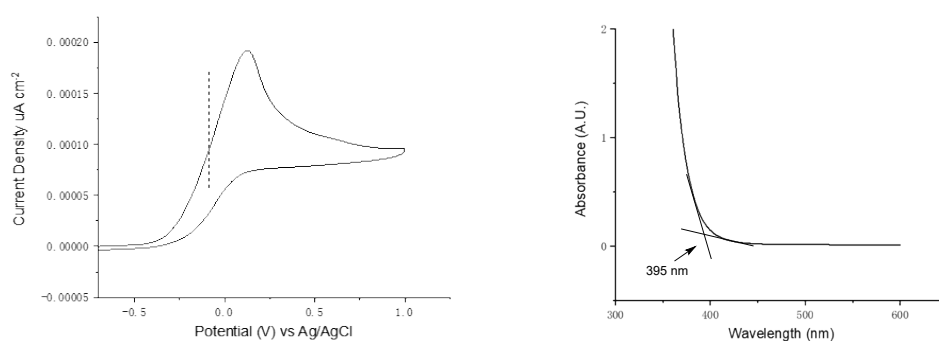

**Figure S8.** Cyclic Voltammetry Experiments **Figure S9.** UV/vis absorption spectra of **S6** anion

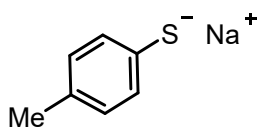

$$E_{p/2}(\mathbf{S6}^{\bullet}/\mathbf{S6}^{\ominus}) = -0.16 \text{ V vs. SCE}$$

The results of Cyclic voltammetry experiments indicated that  $E_{p/2}(\mathbf{S6}^{\bullet}/\mathbf{S6}^{\ominus}) = -0.16 \text{ V}$  vs SCE. With this data in hand, we calculated the redox potential of the excited **S6** anion employing the following equation: [4]

$$E_{p/2}(\mathbf{S6}^{\bullet}/\mathbf{S6}^{\bullet*}) = E_{p/2}(\mathbf{S6}^{\bullet}/\mathbf{S6}^{\ominus}) - E_{0-0}(\mathbf{S6}^{\bullet*}/\mathbf{S6}^{\ominus})$$

$E_{p/2}(\mathbf{S6}^{\bullet}/\mathbf{S6}^{\ominus}) = -0.16 \text{ V}$  vs SCE, In the absence of vibrational structures,  $E_{0-0}$  can be roughly estimated from the absorption.[5] This corresponds to 395 nm, which translates into an  $E_{0-0}(\mathbf{S6}^{\bullet*}/\mathbf{S6}^{\ominus})$  of 3.17 eV for the **S6** anion.

$$E_{p/2}(\mathbf{S6}^{\bullet}/\mathbf{S6}^{\bullet*}) = E_{p/2}(\mathbf{S6}^{\bullet}/\mathbf{S6}^{\ominus}) - E_{0-0}(\mathbf{S6}^{\bullet*}/\mathbf{S6}^{\ominus}) = -0.16 - 3.17 = -3.33 \text{ V vs SCE.}$$

## 5.7 Proportions of 2a and 3a under Conditions A and B

In order to further investigate the proportion and conversion of products **2a** and **3a** under different conditions, we obtained the yields of products **1a** and **2a** at different reaction times. The results are shown in Figure S10.

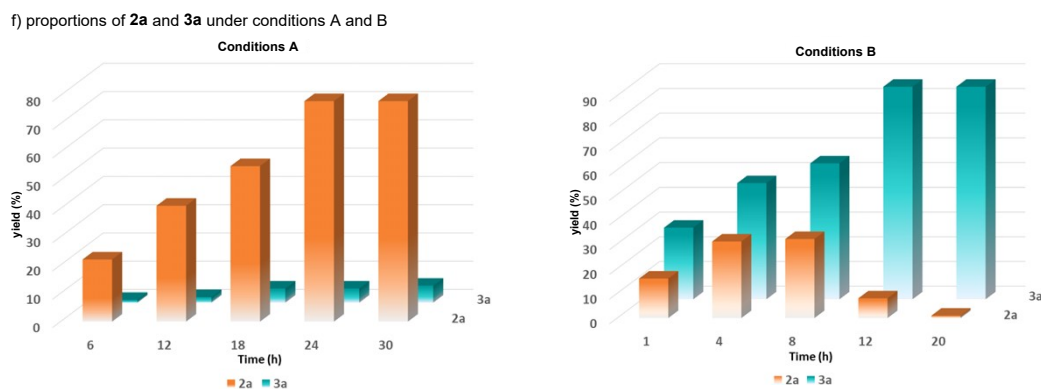

**Figure S10.** Proportions of **2a** and **3a** under Conditions A and B

The competitive formations of **2a** and **3a** were detected under reaction conditions A and B, respectively (Figure S4). Under condition A, the yield of **2a** gradually increased with time, while the yield of **3a** remained below than 10% all the time. Under condition B, the yield of **3a** gradually increased with time. Here, the yield of **2a** can reach up to 31% and then it is converted to **3a** with time.

## 5.8 Proposed mechanism (dideuterodefluorination)

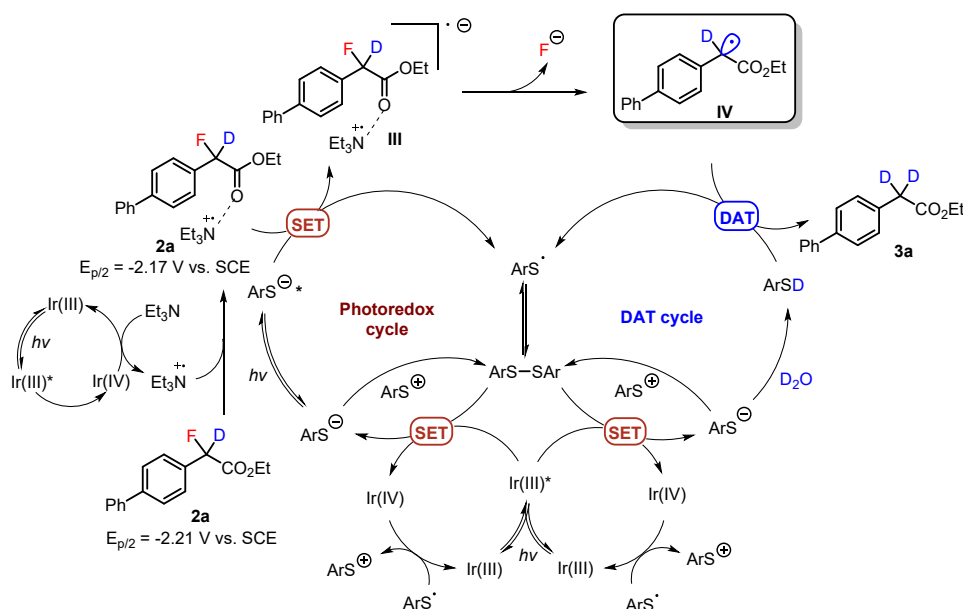

**Figure S11.** Proposed mechanism (dideuterodefluorination)

## 6 Characterization of Products

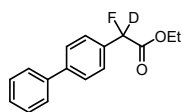

### Propyl 2-([1,1'-biphenyl]-4-yl)-2-fluoroacetate-d (2a)

Colorless oil (78%, 40.4 mg, 97% D);  $R_f = 0.5$  (PE/acetone = 40:1);  $^1\text{H NMR}$  (400 MHz,  $\text{CDCl}_3$ )  $\delta$  7.56 – 7.45 (m, 6H), 7.38 – 7.34 (m, 2H), 7.30 – 7.27 (m, 1H), 4.26 – 4.11 (m, 2H), 1.20 (t,  $J = 7.2$  Hz, 3H);  $^{13}\text{C NMR}$  (100 MHz,  $\text{CDCl}_3$ )  $\delta$  168.7 (d,  $J = 27.6$  Hz), 142.7 (d,  $J = 2.2$  Hz), 140.4, 133.2 (d,  $J = 20.5$  Hz), 129.0, 127.9, 127.6, 127.3, 127.2, 89.0 (dt,  $J = 183.1, 23.3$  Hz), 62.0, 14.2;  $^{19}\text{F NMR}$  (376 MHz,  $\text{CDCl}_3$ )  $\delta$  -179.36 – -180.04 (m); HRMS (ESI) calcd for  $\text{C}_{16}\text{H}_{14}\text{FDO}_2\text{K}$   $[\text{M}+\text{K}]^+$  298.0750, found 298.0763.

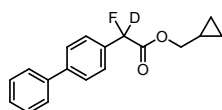

### Cyclopropylmethyl 2-([1,1'-biphenyl]-4-yl)-2-fluoroacetate-d (2b)

Colorless oil (72%, 41.1 mg, 96% D);  $R_f = 0.5$  (PE/acetone = 40:1);  $^1\text{H NMR}$  (400 MHz,  $\text{CDCl}_3$ )  $\delta$  7.65 – 7.55 (m, 6H), 7.47 – 7.44 (m, 2H), 7.39 – 7.36 (m, 1H), 4.12 – 3.99 (m, 2H), 1.18 – 1.12 (m, 1H), 0.59 – 0.54 (m, 2H), 0.30 – 0.26 (m, 2H);  $^{13}\text{C NMR}$  (100 MHz,  $\text{CDCl}_3$ )  $\delta$  168.9 (d,  $J = 27.4$  Hz), 142.7 (d,  $J = 2.2$  Hz), 140.4, 133.3 (d,  $J = 20.6$  Hz), 129.0, 127.9, 127.6, 127.4, 127.3, 89.0 (dt,  $J = 183.8, 23.9$  Hz), 70.8, 9.8, 3.51, 3.46;  $^{19}\text{F NMR}$  (376 MHz,  $\text{CDCl}_3$ )  $\delta$  -177.47 – -181.66 (m); HRMS (ESI) calcd for  $\text{C}_{18}\text{H}_{20}\text{FDNO}_2$   $[\text{M}+\text{NH}_4]^+$  303.1614, found 303.1608.

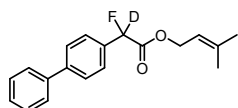

### 3-Methylbut-2-en-1-yl 2-([1,1'-biphenyl]-4-yl)-2-fluoroacetate-d (2c)

Colorless oil (63%, 37.7 mg, 96% D);  $R_f = 0.5$  (PE/acetone = 40:1);  $^1\text{H NMR}$  (400 MHz,  $\text{CDCl}_3$ )  $\delta$  7.62 – 7.56 (m, 6H), 7.46 – 7.42 (m, 2H), 7.38 – 7.34 (m, 1H), 5.34 – 5.30 (m, 1H), 4.76 – 4.59 (m, 2H), 1.73 (s, 3H), 1.67 (s, 3H);  $^{13}\text{C NMR}$  (100 MHz,  $\text{CDCl}_3$ )  $\delta$  168.7 (d,  $J = 27.5$  Hz), 142.7 (d,  $J = 2.2$  Hz), 140.6, 140.5, 133.3 (d,  $J = 20.4$  Hz), 129.0, 127.9, 127.6, 127.4, 127.3, 117.8, 89.0 (dt,  $J = 183.8, 22.8$  Hz), 62.8, 25.9, 18.2;  $^{19}\text{F NMR}$  (376 MHz,  $\text{CDCl}_3$ )  $\delta$  -179.01 – -179.68 (m); HRMS (ESI) calcd for  $\text{C}_{19}\text{H}_{18}\text{FDO}_2\text{Na}$   $[\text{M}+\text{Na}]^+$  322.1324, found 322.1334.

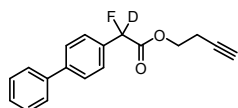

### But-3-yn-1-yl 2-([1,1'-biphenyl]-4-yl)-2-fluoroacetate-d (2d)

Colorless oil (65%, 36.8 mg, 97% D);  $R_f = 0.5$  (PE/acetone = 40:1);  $^1\text{H NMR}$  (400 MHz,  $\text{CDCl}_3$ )  $\delta$  7.56 – 7.47 (m, 6H), 7.38 (t,  $J = 7.6$  Hz, 2H), 7.32 – 7.28 (m, 1H), 4.39 – 4.07 (m, 2H), 2.48 (t,  $J = 6.8$  Hz, 2H), 1.89 (s, 1H);  $^{13}\text{C NMR}$  (100 MHz,  $\text{CDCl}_3$ )  $\delta$  168.4 (d,  $J = 28.0$  Hz), 142.8 (d,  $J = 2.2$  Hz), 140.4, 132.9 (d,  $J = 20.5$  Hz), 129.0, 127.9, 127.7, 127.4, 127.3, 89.2 (dt,  $J = 183.2, 18.2$  Hz), 79.4, 70.4, 63.4, 19.0;

$^{19}\text{F}$  NMR (376 MHz,  $\text{CDCl}_3$ )  $\delta$  -179.76 – -180.43 (m); HRMS (ESI) calcd for  $\text{C}_{18}\text{H}_{14}\text{FDO}_2\text{K}$   $[\text{M}+\text{K}]^+$  322.0750, found 322.0737.

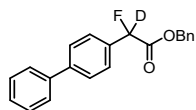

### Benzyl 2-([1,1'-biphenyl]-4-yl)-2-fluoroacetate-d (2e)

Colorless oil (58%, 37.2 mg, 97% D);  $R_f$  = 0.4 (PE/acetone = 40:1);  $^1\text{H}$  NMR (400 MHz,  $\text{CDCl}_3$ )  $\delta$  7.64 – 7.53 (m, 6H), 7.49 – 7.45 (m, 2H), 7.41 – 7.31 (m, 6H), 5.21 (d,  $J$  = 12.0 Hz, 1H), 5.29 (d,  $J$  = 12.0 Hz, 1H);  $^{13}\text{C}$  NMR (100 MHz,  $\text{CDCl}_3$ )  $\delta$  168.51 (d,  $J$  = 27.9 Hz), 142.76 (d,  $J$  = 2.1 Hz), 140.4, 135.0, 133.0 (d,  $J$  = 20.5 Hz), 129.0, 128.73, 128.66, 128.3, 127.9, 127.6, 127.4, 127.3, 89.0 (dt,  $J$  = 184.0, 24.2 Hz), 67.5;  $^{19}\text{F}$  NMR (376 MHz,  $\text{CDCl}_3$ )  $\delta$  -179.39 – -180.06 (m); HRMS (ESI) calcd for  $\text{C}_{21}\text{H}_{16}\text{FO}_2\text{D}$   $[\text{M}]^+$  321.1270, found 321.1279.

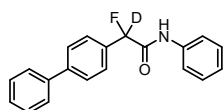

### 2-([1,1'-Biphenyl]-4-yl)-2-fluoro-N-phenylacetamide-2-d (2f)

White solid (43%, 26.3 mg, 97% D); m.p.: 151-152 °C;  $R_f$  = 0.4 (PE/acetone = 40:1);  $^1\text{H}$  NMR (400 MHz,  $\text{CDCl}_3$ )  $\delta$  8.24 (s, 1H), 7.66 – 7.58 (m, 8H), 7.48 – 7.44 (m, 2H), 7.39 – 7.35 (m, 3H), 7.20 – 7.16 (m, 1H);  $^{13}\text{C}$  NMR (100 MHz,  $\text{CDCl}_3$ )  $\delta$  166.5 (d,  $J$  = 20.7 Hz), 142.8 (d,  $J$  = 2.4 Hz), 140.5, 136.8, 133.4 (d,  $J$  = 19.1 Hz), 129.3, 129.0, 127.8, 127.7, 127.33, 127.28, 125.3, 120.2, 91.5 (dt,  $J$  = 188.2, 23.1 Hz);  $^{19}\text{F}$  NMR (376 MHz,  $\text{CDCl}_3$ )  $\delta$  -172.65 – -178.33 (m); HRMS (ESI) calcd for  $\text{C}_{20}\text{H}_{15}\text{FDNONa}$   $[\text{M}+\text{Na}]^+$  329.1171, found 329.1170.

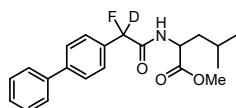

### Methyl (2-([1,1'-biphenyl]-4-yl)-2-fluoroacetyl)leucinate (2g)

White solid (51%, 36.5 mg, 92% D); m.p.: 65-66 °C;  $R_f$  = 0.4 (PE/acetone = 40:1);  $^1\text{H}$  NMR (400 MHz,  $\text{CDCl}_3$ )  $\delta$  7.64 – 7.55 (m, 5H), 7.52 – 7.43 (m, 3H), 7.39 – 7.35 (m, 1H), 4.74 – 4.68 (m, 1H), 3.78 (s, 1.5H), 3.74 (s, 1.5H), 1.75 – 1.62 (m), 1.00 (d,  $J$  = 2.8 Hz, 1.5H), 0.99 (d,  $J$  = 2.8 Hz, 1.5H), 0.94 (d,  $J$  = 6.0 Hz, 1.5H), 0.92 (d,  $J$  = 6.1 Hz, 1.5H);  $^{13}\text{C}$  NMR (100 MHz,  $\text{CDCl}_3$ )  $\delta$  172.96, 172.94, 168.52 (d,  $J$  = 22.2 Hz), 168.46 (d,  $J$  = 22.3 Hz), 142.65 (d,  $J$  = 12.2 Hz), 142.63 (d,  $J$  = 11.9 Hz), 140.53, 140.48, 133.60 (d,  $J$  = 19.1 Hz), 133.50 (d,  $J$  = 19.1 Hz), 128.95 (s), 127.76 (s), 127.70 (s), 127.63 (s), 127.30 (s), 127.19 (s), 91.41 (dt,  $J$  = 191.5, 21.6 Hz), 52.62 (s), 52.58 (s), 41.64 (s), 41.55 (s), 25.02 (s), 22.97 (s), 22.86 (s), 22.04 (s), 21.92 (s);  $^{19}\text{F}$  NMR (376 MHz,  $\text{CDCl}_3$ )  $\delta$  -175.32 – -176.00 (m), -177.71 – -178.39 (m); HRMS (ESI) calcd for  $\text{C}_{21}\text{H}_{23}\text{FDNO}_3\text{Na}$   $[\text{M}+\text{Na}]^+$  381.1695, found 381.1698.

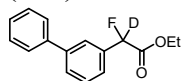

### Ethyl 2-([1,1'-biphenyl]-3-yl)-2-fluoroacetate-d (2h)

Colorless oil (70%, 36.3 mg, 99% D);  $R_f$  = 0.4 (PE/acetone = 40:1);  $^1\text{H}$  NMR (400 MHz,  $\text{CDCl}_3$ )  $\delta$  7.70 (s, 1H), 7.65 – 7.59 (m, 3H), 7.51 – 7.44 (m, 4H), 7.40 – 7.35 (m,

1H), 4.35 – 4.19 (m, 2H), 1.28 (t,  $J = 7.2$  Hz, 3H);  $^{13}\text{C}$  NMR (100 MHz,  $\text{CDCl}_3$ )  $\delta$  168.6 (d,  $J = 27.5$  Hz), 142.0, 140.4, 134.8 (d,  $J = 20.8$  Hz), 129.3, 129.0, 128.5 (d,  $J = 1.4$  Hz), 127.8, 127.3, 125.5 (t,  $J = 5.7$  Hz), 88.9 (dt,  $J = 184.6, 22.7$  Hz), 62.0, 14.2;  $^{19}\text{F}$  NMR (376 MHz,  $\text{CDCl}_3$ )  $\delta$  -179.92 – -180.60 (m); HRMS (ESI) calcd for  $\text{C}_{16}\text{H}_{14}\text{FDO}_2\text{K}$   $[\text{M}+\text{K}]^+$  298.0750, found 298.0746.

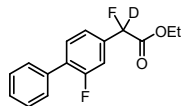

#### Ethyl 2-fluoro-2-(2-fluoro-[1,1'-biphenyl]-4-yl)acetate-d (2i)

Colorless oil (49%, 27.2 mg, 97% D);  $R_f = 0.4$  (PE/acetone = 40:1);  $^1\text{H}$  NMR (400 MHz,  $\text{CDCl}_3$ )  $\delta$  7.56 – 7.54 (m, 2H), 7.51 – 7.44 (m, 3H), 7.41 – 7.37 (m, 1H), 7.34 – 7.28 (m, 2H), 4.36 – 4.22 (m, 2H), 1.30 (t,  $J = 7.2$  Hz, 3H);  $^{13}\text{C}$  NMR (100 MHz,  $\text{CDCl}_3$ )  $\delta$  168.2 (d,  $J = 26.9$  Hz), 161.0, 158.5, 135.3 (dd,  $J = 21.0, 7.8$  Hz), 135.1, 131.3 (d,  $J = 3.8$  Hz), 130.5 (dd,  $J = 13.4, 1.8$  Hz), 129.1 (d,  $J = 2.8$  Hz), 128.7, 128.2, 122.5 (dd,  $J = 6.1, 3.5$  Hz), 114.5 (dd,  $J = 24.7, 6.7$  Hz), 88.4 (dt,  $J = 184.7, 25.0$  Hz), 62.3, 14.2;  $^{19}\text{F}$  NMR (376 MHz,  $\text{CDCl}_3$ )  $\delta$  -116.23 – -117.06 (t,  $J = 9.8$  Hz), -181.41 – -182.30 (m); HRMS (ESI) calcd for  $\text{C}_{16}\text{H}_{13}\text{F}_2\text{DO}_2\text{Na}$   $[\text{M}+\text{Na}]^+$  300.0917, found 300.0923.

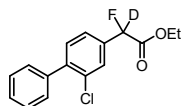

#### Ethyl 2-(2-chloro-[1,1'-biphenyl]-4-yl)-2-fluoroacetate-d (2j)

Colorless oil (58%, 34.0 mg, 98% D);  $R_f = 0.4$  (PE/acetone = 40:1);  $^1\text{H}$  NMR (400 MHz,  $\text{CDCl}_3$ )  $\delta$  7.61 (s, 1H), 7.44 – 7.38 (m, 7H), 4.37 – 4.22 (m, 2H), 1.32 (t,  $J = 7.2$  Hz, 3H);  $^{13}\text{C}$  NMR (100 MHz,  $\text{CDCl}_3$ )  $\delta$  168.1 (d,  $J = 27.0$  Hz), 141.9 (d,  $J = 1.9$  Hz), 138.7, 134.8 (d,  $J = 21.0$  Hz), 133.1, 131.8, 129.5, 128.3, 128.2 (d,  $J = 6.7$  Hz), 128.1, 125.0 (d,  $J = 6.1$  Hz), 88.2 (dt,  $J = 185.4, 23.0$  Hz), 62.4, 14.2;  $^{19}\text{F}$  NMR (376 MHz,  $\text{CDCl}_3$ )  $\delta$  -181.52 – -182.17 (m); HRMS (ESI) calcd for  $\text{C}_{16}\text{H}_{17}\text{FCIDO}_2\text{N}$   $[\text{M}+\text{NH}_4]^+$  311.1067, found 311.1077.

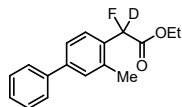

#### Ethyl 2-fluoro-2-(2-methyl-[1,1'-biphenyl]-4-yl)acetate-d (2k)

Colorless oil (51%, 27.9 mg, 97% D);  $R_f = 0.4$  (PE/acetone = 40:1);  $^1\text{H}$  NMR (400 MHz,  $\text{CDCl}_3$ )  $\delta$  7.59 (d,  $J = 7.2$  Hz, 2H), 7.49 – 7.42 (m, 5H), 7.37 (d,  $J = 7.2$  Hz, 1H), 4.37 – 4.18 (m, 2H), 2.51 (s, 3H), 1.29 (t,  $J = 7.2$  Hz, 3H);  $^{13}\text{C}$  NMR (100 MHz,  $\text{CDCl}_3$ )  $\delta$  169.0 (d,  $J = 28.0$  Hz), 142.6 (d,  $J = 2.7$  Hz), 140.5, 137.1 (d,  $J = 3.7$  Hz), 131.8 (d,  $J = 19.2$  Hz), 129.8, 128.9, 128.0 (d,  $J = 6.5$  Hz), 127.8, 127.3, 88.8 (dt,  $J = 185.2, 25.3$  Hz), 62.0, 19.5, 14.2;  $^{19}\text{F}$  NMR (376 MHz,  $\text{CDCl}_3$ )  $\delta$  -178.64 – -179.93 (m); HRMS (ESI) calcd for  $\text{C}_{17}\text{H}_{16}\text{FDO}_2\text{K}$   $[\text{M}+\text{K}]^+$  312.0906, found 312.0907.

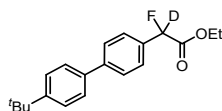

**Ethyl 2-(4'-(tert-butyl)-[1,1'-biphenyl]-4-yl)-2-fluoroacetate-d (2l)**

Colorless oil (68%, 42.9 mg, 97% D);  $R_f = 0.4$  (PE/acetone = 40:1);  $^1\text{H NMR}$  (400 MHz,  $\text{CDCl}_3$ )  $\delta$  7.63 (d,  $J = 7.2$  Hz, 2H), 7.56 – 7.52 (m, 4H), 7.48 (d,  $J = 7.2$  Hz, 2H), 4.35 – 4.20 (m, 2H), 1.37 (s, 9H), 1.29 (t,  $J = 6.0$  Hz, 3H);  $^{13}\text{C NMR}$  (100 MHz,  $\text{CDCl}_3$ )  $\delta$  168.7 (d,  $J = 27.6$  Hz), 151.0, 142.6, 137.5, 132.9 (d,  $J = 20.2$  Hz), 127.5, 127.3 (d,  $J = 5.8$  Hz), 126.9, 126.0, 87.2 (dt,  $J = 184.6, 22.5$  Hz), 62.0, 34.7, 31.5, 14.2;  $^{19}\text{F NMR}$  (376 MHz,  $\text{CDCl}_3$ )  $\delta$  -179.02 – -179.70 (m); HRMS (ESI)  $m/z$ :  $[\text{M}+\text{H}]^+$  Calcd for  $\text{C}_{20}\text{H}_{23}\text{FDO}_2$  316.1818; Found: 316.1820. HRMS (ESI) calcd for  $\text{C}_{20}\text{H}_{23}\text{FDO}_2$   $[\text{M}+\text{H}]^+$  316.1818, found 316.1820.

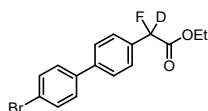

**Ethyl 2-(4'-bromo-[1,1'-biphenyl]-4-yl)-2-fluoroacetate-d (2m)**

Colorless oil (52%, 35.1 mg, 98% D);  $R_f = 0.4$  (PE/acetone = 40:1);  $^1\text{H NMR}$  (400 MHz,  $\text{CDCl}_3$ )  $\delta$  7.60 – 7.54 (m, 6H), 7.45 (d,  $J = 8.0$  Hz, 2H), 4.35 – 4.2 (m, 2H), 1.29 (t,  $J = 7.2$  Hz, 3H);  $^{13}\text{C NMR}$  (100 MHz,  $\text{CDCl}_3$ )  $\delta$  168.6 (d,  $J = 27.3$  Hz), 141.4 (d,  $J = 2.0$  Hz), 139.3, 133.7 (d,  $J = 20.3$  Hz), 132.1, 128.9, 127.42, 127.37, 127.3, 122.2, 88.9 (dt,  $J = 182.6, 24.0$  Hz), 62.1, 14.2;  $^{19}\text{F NMR}$  (376 MHz,  $\text{CDCl}_3$ )  $\delta$  -179.95 – -180.62 (m); HRMS (ESI) calcd for  $\text{C}_{16}\text{H}_{13}\text{BrFDO}_2\text{K}$   $[\text{M}+\text{K}]^+$  375.9856, found 375.9854.

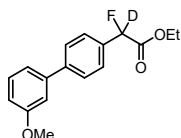

**Ethyl 2-fluoro-2-(3'-methoxy-[1,1'-biphenyl]-4-yl)acetate-d (2n)**

Colorless oil (77%, 44.5 mg, 97% D);  $R_f = 0.5$  (PE/acetone = 40:1);  $^1\text{H NMR}$  (400 MHz,  $\text{CDCl}_3$ )  $\delta$  7.63 (d,  $J = 8.0$  Hz, 2H), 7.54 (d,  $J = 7.6$  Hz, 2H), 7.39 – 7.35 (m, 1H), 7.17 (d,  $J = 7.6$  Hz, 1H), 7.12 (s, 1H), 6.92 (dd,  $J = 8.0$  Hz, 1H), 4.33 – 4.22 (m, 2H), 3.87 (s, 3H), 1.29 (t,  $J = 7.1$  Hz, 3H);  $^{13}\text{C NMR}$  (100 MHz,  $\text{CDCl}_3$ )  $\delta$  168.7 (d,  $J = 27.3$  Hz), 160.1, 142.6, 141.9, 133.4 (d,  $J = 20.3$  Hz), 130.0, 127.7, 127.2 (d,  $J = 5.8$  Hz), 119.8, 113.2 (d,  $J = 14.2$  Hz), 89.0 (dt,  $J = 185.4, 23.0$  Hz), 62.1, 55.5, 14.2;  $^{19}\text{F NMR}$  (376 MHz,  $\text{CDCl}_3$ )  $\delta$  -179.50 – -180.17 (m); HRMS (ESI) calcd for  $\text{C}_{17}\text{H}_{16}\text{FDO}_3\text{K}$   $[\text{M}+\text{K}]^+$  328.0856, found 328.0848.

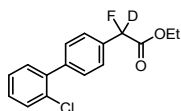

**Ethyl 2-(2'-chloro-[1,1'-biphenyl]-4-yl)-2-fluoroacetate-d (2o)**

Colorless oil (51%, 29.9 mg, 97% D);  $R_f = 0.4$  (PE/acetone = 40:1);  $^1\text{H NMR}$  (400 MHz,  $\text{CDCl}_3$ )  $\delta$  7.55 – 7.47 (m, 5H), 7.33 – 7.29 (m, 3H), 4.36 – 4.21 (m, 2H), 1.30 (t,  $J = 7.2$  Hz, 3H);  $^{13}\text{C NMR}$  (100 MHz,  $\text{CDCl}_3$ )  $\delta$  168.62 (d,  $J = 27.4$  Hz), 140.8 (d,  $J = 2.2$  Hz), 139.8, 133.6 (d,  $J = 20.6$  Hz), 132.6, 131.4, 130.2, 130.0, 129.0, 127.1, 126.5



(d,  $J = 6.2$  Hz), 88.9 (dt,  $J = 184.8, 22.5$  Hz), 62.1, 14.2;  $^{19}\text{F}$  NMR (376 MHz,  $\text{CDCl}_3$ )  $\delta$  -180.18 – -180.84 (m); HRMS (ESI) calcd for  $\text{C}_{16}\text{H}_{17}\text{ClFDO}_2$   $[\text{M}+\text{NH}_4]^+$  311.1067, found 311.1059.

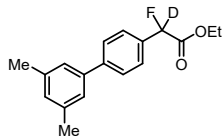

### Ethyl 2-(3',5'-dimethyl-[1,1'-biphenyl]-4-yl)-2-fluoroacetate-d (2p)

Colorless oil (67%, 38.5 mg, 97% D);  $R_f = 0.4$  (PE/acetone = 40:1);  $^1\text{H}$  NMR (400 MHz,  $\text{CDCl}_3$ )  $\delta$  7.61 (d,  $J = 8.0$  Hz, 2H), 7.52 (d,  $J = 7.2$  Hz, 2H), 7.20 (s, 2H), 7.02 (s, 1H), 4.35 – 4.2 (m, 2H), 2.39 (s, 6H), 1.29 (t,  $J = 7.2$  Hz, 3H);  $^{13}\text{C}$  NMR (100 MHz,  $\text{CDCl}_3$ )  $\delta$  168.7 (d,  $J = 27.7$  Hz), 143.0 (d,  $J = 4.4$  Hz), 140.5, 138.5, 133.0 (d,  $J = 20.6$  Hz), 129.5, 127.7, 127.2 (d,  $J = 5.9$  Hz), 125.2, 89.4 (dt,  $J = 184.3, 24.1$  Hz), 62.0, 21.5, 14.2;  $^{19}\text{F}$  NMR (376 MHz,  $\text{CDCl}_3$ )  $\delta$  -179.15 – -179.83 (m); HRMS (ESI) calcd for  $\text{C}_{18}\text{H}_{18}\text{FDO}_2\text{Na}$   $[\text{M}+\text{Na}]^+$  310.1324, found 310.1313.

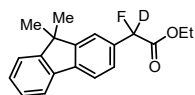

### Ethyl 2-(9,9-dimethyl-9H-fluoren-2-yl)-2-fluoroacetate-d (2q)

Colorless oil (58%, 34.7 mg, 98% D);  $R_f = 0.4$  (PE/acetone = 40:1);  $^1\text{H}$  NMR (400 MHz,  $\text{CDCl}_3$ )  $\delta$  7.75 (d,  $J = 6.4$  Hz, 2H), 7.55 (s, 1H), 7.45 – 7.44 (m, 2H), 7.37 – 7.35 (m, 2H), 4.35 – 4.21 (m, 2H), 1.50 (s, 6H), 1.28 (t,  $J = 6.8$  Hz, 3H);  $^{13}\text{C}$  NMR (100 MHz,  $\text{CDCl}_3$ )  $\delta$  168.9 (d,  $J = 27.9$  Hz), 154.2 (d,  $J = 23.7$  Hz), 140.9 (d,  $J = 2.2$  Hz), 138.4, 133.1 (d,  $J = 20.2$  Hz), 128.0, 127.2, 126.0 (d,  $J = 5.9$  Hz), 122.8, 121.2 (d,  $J = 5.8$  Hz), 120.4 (d,  $J = 15.3$  Hz), 89.5 (dt,  $J = 182.6, 24.0$  Hz), 61.9, 47.1, 27.2, 14.2;  $^{19}\text{F}$  NMR (376 MHz,  $\text{CDCl}_3$ )  $\delta$  -177.13 – -177.80 (m); HRMS (ESI) calcd for  $\text{C}_{19}\text{H}_{18}\text{FDO}_2\text{Na}$   $[\text{M}+\text{Na}]^+$  322.1324, found 322.1317.

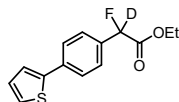

### Ethyl 2-fluoro-2-(4-(thiophen-2-yl)phenyl)acetate-d (2r)

Colorless oil (56%, 29.7 mg, 97% D);  $R_f = 0.4$  (PE/acetone = 40:1);  $^1\text{H}$  NMR (400 MHz,  $\text{CDCl}_3$ )  $\delta$  7.65 (d,  $J = 7.6$  Hz, 2H), 7.48 (d,  $J = 7.6$  Hz, 2H), 7.35 – 7.31 (m, 2H), 7.10 – 7.09 (m, 1H), 4.33 – 4.19 (m, 2H), 1.28 (t,  $J = 7.2$  Hz, 3H).  $^{13}\text{C}$  NMR (100 MHz,  $\text{CDCl}_3$ )  $\delta$  168.6 (d,  $J = 27.6$  Hz), 143.5, 135.8 (d,  $J = 2.3$  Hz), 133.3 (d,  $J = 20.3$  Hz), 128.3, 127.4 (d,  $J = 5.9$  Hz), 126.3, 125.6, 123.9, 88.9 (dt,  $J = 184.2, 4.6$  Hz), 62.1, 14.2.  $^{19}\text{F}$  NMR (376 MHz,  $\text{CDCl}_3$ )  $\delta$  -179.74 – -180.42 (m); HRMS (ESI) calcd for  $\text{C}_{14}\text{H}_{13}\text{FDO}_2\text{S}$   $[\text{M}+\text{H}]^+$  266.0756, found 266.0749.

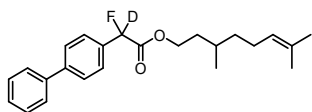

### 3,7-Dimethyloct-6-en-1-yl 2-([1,1'-biphenyl]-4-yl)-2-fluoroacetate-d (2s)

Colorless oil (49%, 36.2 mg, 96% D, dr = 1:1);  $R_f = 0.4$  (PE/acetone = 40:1);  $^1\text{H}$  NMR (400 MHz,  $\text{CDCl}_3$ )  $\delta$  7.64 – 7.53 (m, 6H), 7.45 (t,  $J = 7.2$  Hz, 2H), 7.39 – 7.36

(m, 1H), 5.05 (t,  $J = 7.2$  Hz, 1H), 4.26 – 4.23 (m, 2H), 1.95 – 1.89 (m, 2H), 1.69 – 1.65 (m, 4H), 1.59 – 1.57 (m, 3H), 1.46 – 1.42 (m, 2H), 1.29 – 1.28 (m, 1H), 1.16 – 1.14 (m, 1H), 0.87 (t,  $J = 5.2$  Hz, 3H);  $^{13}\text{C}$  NMR (100 MHz,  $\text{CDCl}_3$ )  $\delta$  168.8 (d,  $J = 27.5$  Hz), 142.7 (d,  $J = 1.9$  Hz), 140.4, 133.3 (d,  $J = 20.6$  Hz), 131.6, 129.0, 127.9, 127.6, 127.27, 127.26 (d,  $J = 1.4$  Hz), 127.2, 124.6, 89.0 (dt,  $J = 184.8, 16.7$  Hz), 64.5, 37.0, 35.4, 29.5, 29.5, 25.8, 25.5, 19.5, 19.4, 17.8;  $^{19}\text{F}$  NMR (376 MHz,  $\text{CDCl}_3$ )  $\delta$  -179.62 – -180.42 (m); HRMS (ESI) calcd for  $\text{C}_{24}\text{H}_{29}\text{FDO}_2$   $[\text{M}+\text{H}]^+$  370.2287, found 370.2288.

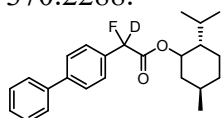

**2-Isopropyl-5-methylcyclohexyl 2-([1,1'-biphenyl]-4-yl)-2-fluoroacetate-d (2t)**

Colorless oil (61%, 45.0 mg, 99% D, dr = 1:1);  $R_f = 0.4$  (PE/acetone = 40:1);  $^1\text{H}$  NMR (400 MHz,  $\text{CDCl}_3$ )  $\delta$  7.66 – 7.54 (m, 6H), 7.48 – 7.45 (m, 2H), 7.40 – 7.36 (m, 1H), 4.86 – 4.74 (m, 1H), 2.07 – 1.88 (m, 1H), 1.692 – 1.61 (m, 2H), 1.48 – 1.28 (m, 3H), 1.11 – 0.97 (m, 2H), 0.92 – 0.84 (m, 5.5H), 0.78 (d,  $J = 5.6$  Hz, 1.5H), 0.69 (d,  $J = 5.6$  Hz, 1.5H), 0.53 (d,  $J = 5.2$  Hz, 1.5H);  $^{13}\text{C}$  NMR (100 MHz,  $\text{CDCl}_3$ )  $\delta$  168.45 (d,  $J = 8.6$  Hz), 168.2 (d,  $J = 7.9$  Hz), 142.7 (d,  $J = 2.1$  Hz), 142.5 (d,  $J = 2.2$  Hz), 140.5, 140.4, 129.0, 127.8, 127.53, 127.50, 127.4 (d,  $J = 5.5$  Hz), 127.3, 127.2 (d,  $J = 6.0$  Hz), 89.02 (dt,  $J = 183.3, 24.6$  Hz), 88.99 (dt,  $J = 182.8, 23.5$  Hz), 76.2, 47.1, 47.0, 40.8, 40.4, 34.22, 34.19, 31.52, 31.47, 26.3, 25.8, 23.5, 23.3, 22.1, 22.0, 20.8, 20.7, 16.3, 16.0;  $^{19}\text{F}$  NMR (376 MHz,  $\text{CDCl}_3$ )  $\delta$  -178.34 – -179.81 (m); HRMS (ESI) calcd for  $\text{C}_{24}\text{H}_{29}\text{FDO}$   $[\text{M}+\text{H}]^+$  370.2287, found 370.2289.

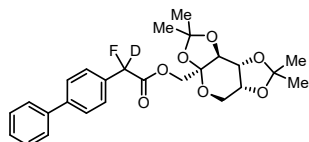

**((3aS,5aR,8aR,8bS)-2,2,7,7-tetramethyltetrahydro-3aH-bis([1,3]dioxolo)[4,5-b:4',5'-d]pyran-3a-yl)methyl 2-([1,1'-biphenyl]-4-yl)-2-fluoroacetate-d (2u)**

Colorless oil (52%, 49.2 mg, 96% D, dr = 1:1);  $R_f = 0.4$  (PE/acetone = 40:1);  $^1\text{H}$  NMR (400 MHz,  $\text{CDCl}_3$ )  $\delta$  7.64 – 7.53 (m, 6H), 7.47 – 7.44 (m,  $J = 7.2$  Hz, 2H), 7.40 – 7.36 (m, 1H), 4.63 – 4.6 (m, 1H), 4.52 – 4.48 (m, 1H), 4.33 – 4.14 (m, 3H), 3.92 – 3.52 (m, 3H), 1.52 (s, 3H), 1.49 – 1.47 (m, 3H), 1.34 – 1.20 (m, 6H);  $^{13}\text{C}$  NMR (100 MHz,  $\text{CDCl}_3$ )  $\delta$  168.0 (d,  $J = 4.5$  Hz), 142.9, 140.4, 132.8 (d,  $J = 20.0$  Hz), 129.0, 127.9, 127.74, 127.72, 127.67, 127.6 (d,  $J = 5.6$  Hz), 127.3, 109.4, 109.3, 109.19, 109.15, 101.3, 101.2, 89.7 (dt,  $J = 183.4, 23.3$  Hz), 70.90, 70.87, 70.4, 70.11, 70.10, 66.0, 65.9, 61.5, 42.7, 34.1, 26.6, 26.0, 25.2, 25.0, 24.2;  $^{19}\text{F}$  NMR (376 MHz,  $\text{CDCl}_3$ )  $\delta$  -177.76 – -178.70 (m); HRMS (ESI) calcd for  $\text{C}_{26}\text{H}_{29}\text{FDO}_7$   $[\text{M}+\text{H}]^+$  474.203, found 474.2045.

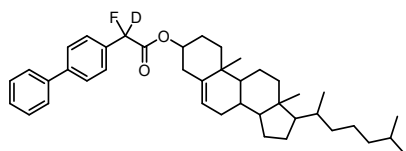

**10,13-Dimethyl-17-(6-methylheptan-2-yl)-2,3,4,7,8,9,10,11,12,13,14,15,16,17-tetradecahydro-1H-cyclopenta[a]phenanthren-3-yl-2-([1,1'-biphenyl]-4-yl)-2-fluoroacetate-d (2v)**

White solid (50%, 59.9 mg, 99% D, dr = 1:1); m.p.: 95-96 °C;  $R_f$  = 0.4 (PE/acetone = 40:1);  $^1\text{H}$  NMR (400 MHz,  $\text{CDCl}_3$ )  $\delta$  7.65 – 7.54 (m, 6H), 7.47 – 7.44 (m, 2H), 7.39 – 7.35 (m, 1H), 5.39 (s, 0.5H), 5.35 (s, 0.5H), 4.77 – 4.75 (m, 1H), 2.40 – 2.27 (m, 2H), 2.03 – 1.79 (m, 6H), 1.59 – 1.47 (m, 8H), 1.35 – 1.25 (m, 5H), 1.12 – 1.06 (m, 6H), 1.02 – 0.98 (s, 5H), 0.93 – 0.86 (m, 8H), 0.70 – 0.67 (m, 3H);  $^{13}\text{C}$  NMR (100 MHz,  $\text{CDCl}_3$ )  $\delta$  168.1 (d,  $J$  = 27.2 Hz), 142.6 (d,  $J$  = 2.1 Hz), 140.4, 139.2 (d,  $J$  = 5.7 Hz), 133.4 (d,  $J$  = 20.3 Hz), 129.0, 127.8, 127.6, 127.3, 127.2, 123.3 (d,  $J$  = 5.0 Hz), 87.2 (dt,  $J$  = 183.4, 21.8 Hz) 75.9, 56.8, 56.2, 50.1, 42.4, 39.8, 39.7, 38.0, 37.8, 37.0, 36.9, 36.7, 36.3, 35.9, 32.01, 31.95, 28.4, 28.2, 27.8, 27.6, 24.4, 24.0, 23.0, 22.7, 21.2, 19.4, 18.9, 12.0;  $^{19}\text{F}$  NMR (376 MHz,  $\text{CDCl}_3$ )  $\delta$  -178.95 – -179.61 (m); HRMS (ESI) calcd for  $\text{C}_{41}\text{H}_{54}\text{FDO}_2\text{K}$   $[\text{M}+\text{K}]^+$  638.3880, found 638.3862.

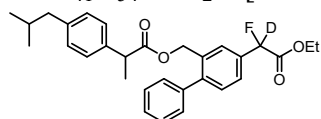

**(4-(2-Ethoxy-1-fluoro-2-oxoethyl-1-d)-[1,1'-biphenyl]-2-yl)methyl-2-(4-isobutylphenyl)propanoate (2w)**

Colorless oil (52%, 49.6 mg, 99% D, dr = 1:1);  $R_f$  = 0.4 (PE/acetone = 40:1);  $^1\text{H}$  NMR (400 MHz,  $\text{CDCl}_3$ )  $\delta$  7.47 (d,  $J$  = 9.2 Hz, 2H), 7.33 – 7.32 (m, 4H), 7.21 – 7.19 (m, 4H), 7.12 (d,  $J$  = 6.8 Hz, 2H), 5.04 (d,  $J$  = 12.4 Hz, 1H), 4.98 (d,  $J$  = 12.4 Hz, 1H), 4.35 – 4.24 (m, 2H), 3.73 (q,  $J$  = 7.6 Hz, 1H), 2.47 (d,  $J$  = 5.6 Hz, 2H), 1.89 – 1.83 (m, 1H), 1.49 (d,  $J$  = 6.8 Hz, 3H), 1.31 (t,  $J$  = 6.4 Hz, 3H), 0.90 (d,  $J$  = 6.4 Hz, 6H);  $^{13}\text{C}$  NMR (100 MHz,  $\text{CDCl}_3$ )  $\delta$  174.3, 174.3, 168.5 (d,  $J$  = 27.2 Hz), 143.6 (d,  $J$  = 5.6 Hz), 143.58 (d,  $J$  = 5.6 Hz), 140.8, 139.6, 137.6, 134.1, 133.7, 133.5, 130.7, 129.5, 129.1, 128.4, 127.7, 127.4, 126.4 (d,  $J$  = 5.6 Hz), 126.2 (d,  $J$  = 5.7 Hz), 88.8 (dt,  $J$  = 181.9, 23.2 Hz), 64.4, 62.1, 45.22, 45.16, 30.3, 22.5, 18.5, 14.2;  $^{19}\text{F}$  NMR (376 MHz,  $\text{CDCl}_3$ )  $\delta$  -179.44 – -180.55 (m); HRMS (ESI) calcd for  $\text{C}_{30}\text{H}_{32}\text{FDO}_4\text{K}$   $[\text{M}+\text{K}]^+$  516.2057, found 516.2062.

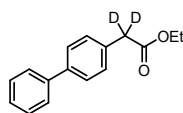

**Ethyl 2-([1,1'-biphenyl]-4-yl)acetate-d<sub>2</sub> (3a)**

Colorless oil (86%, 41.6 mg, 98% D);  $R_f$  = 0.4 (PE/acetone = 40:1);  $^1\text{H}$  NMR (400 MHz,  $\text{CDCl}_3$ )  $\delta$  7.69 – 7.60 (m, 4H), 7.49 – 7.46 (m, 2H), 7.42 – 7.36 (m, 3H), 4.22 (q,  $J$  = 7.2 Hz, 2H), 1.31 (t,  $J$  = 7.2 Hz, 3H);  $^{13}\text{C}$  NMR (100 MHz,  $\text{CDCl}_3$ )  $\delta$  171.6, 140.9, 140.1, 133.2, 129.7, 128.8, 127.4, 127.3, 127.1, 61.0, 41.9 – 40.2 (m), 14.3; HRMS (ESI) calcd for  $\text{C}_{16}\text{H}_{18}\text{D}_2\text{O}_2\text{N}$   $[\text{M}+\text{NH}_4]^+$  260.1614, found 260.1605.

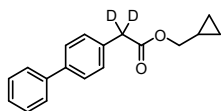

### Cyclopropylmethyl 2-([1,1'-biphenyl]-4-yl)acetate-d<sub>2</sub> (3b)

Colorless oil (80%, 42.9 mg, 98% D);  $R_f = 0.4$  (PE/acetone = 40:1);  $^1\text{H}$  NMR (400 MHz,  $\text{CDCl}_3$ )  $\delta$  7.62 – 7.57 (m, 4H), 7.47 – 7.34 (m, 5H), 3.98 (d,  $J = 7.2$  Hz, 2H), 1.20 – 1.13 (m, 1H), 0.59 (d,  $J = 6.8$  Hz, 2H), 0.31 (d,  $J = 2.0$  Hz, 2H);  $^{13}\text{C}$  NMR (100 MHz,  $\text{CDCl}_3$ )  $\delta$  171.9, 140.9, 140.1, 133.3, 129.8, 128.9, 127.41, 127.36, 127.2, 69.8, 42.2 – 40.0 (m), 9.9, 3.4; HRMS (ESI) calcd for  $\text{C}_{18}\text{H}_{16}\text{D}_2\text{O}_2\text{K}$   $[\text{M}+\text{K}]^+$  307.1064, found 307.1054.

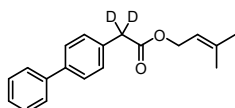

### 3-methylbut-2-en-1-yl 2-([1,1'-biphenyl]-4-yl)acetate-d<sub>2</sub> (3c)

Colorless oil (73%, 41.2 mg, 98% D);  $R_f = 0.4$  (PE/acetone = 40:1);  $^1\text{H}$  NMR (400 MHz,  $\text{CDCl}_3$ )  $\delta$  7.60 – 7.55 (m, 4H), 7.46 – 7.42 (m, 2H), 7.38 – 7.33 (m, 3H), 5.36 (t,  $J = 6.8$  Hz, 1H), 4.62 (d,  $J = 6.8$  Hz, 2H), 1.77 (s, 3H), 1.71 (s, 3H);  $^{13}\text{C}$  NMR (100 MHz,  $\text{CDCl}_3$ )  $\delta$  171.8, 141.0, 140.2, 139.4, 133.2, 129.8, 128.9, 127.44, 127.38, 127.2, 118.6, 62.0, 41.04 – 40.66 (m), 25.9, 18.2; HRMS (ESI) calcd for  $\text{C}_{19}\text{H}_{18}\text{D}_2\text{O}_2\text{K}$   $[\text{M}+\text{K}]^+$  321.1220, found 321.1216.

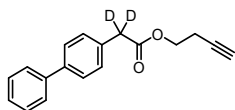

### But-3-yn-1-yl 2-([1,1'-biphenyl]-4-yl)acetate-d<sub>2</sub> (3d)

White solid (69%, 36.7 mg, 98% D); m.p.: 64-65 °C;  $R_f = 0.4$  (PE/acetone = 40:1);  $^1\text{H}$  NMR (400 MHz,  $\text{CDCl}_3$ )  $\delta$  7.60 – 7.56 (m, 4H), 7.46 – 7.43 (m, 2H), 7.39 – 7.34 (m, 3H), 4.24 (t,  $J = 6.2$  Hz, 2H), 2.55 (t,  $J = 6.0$  Hz, 2H), 1.28 (s, 1H);  $^{13}\text{C}$  NMR (100 MHz,  $\text{CDCl}_3$ )  $\delta$  171.5, 140.9, 140.3, 132.9, 129.8, 128.9, 127.5, 127.4, 127.2, 62.7, 40.9 – 39.9 (m), 19.1; HRMS (ESI) calcd for  $\text{C}_{18}\text{H}_{14}\text{D}_2\text{O}_2$   $[\text{M}]^+$  266.1270, found 266.1261.

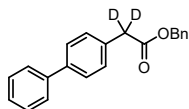

### Benzyl 2-([1,1'-biphenyl]-4-yl)acetate-d<sub>2</sub> (3e)

White solid (75%, 45.6 mg, 96% D); m.p.: 72-73 °C;  $R_f = 0.4$  (PE/acetone = 40:1);  $^1\text{H}$  NMR (400 MHz,  $\text{CDCl}_3$ )  $\delta$  7.61 – 7.57 (m, 4H), 7.48 – 7.44 (m, 2H), 7.40 – 7.35 (m, 8H), 5.18 (s, 2H);  $^{13}\text{C}$  NMR (100 MHz,  $\text{CDCl}_3$ )  $\delta$  171.5, 140.9, 140.3, 136.0, 133.0, 129.8, 128.9, 128.7, 128.4, 128.3, 127.5, 127.4, 127.2, 66.8, 41.2 – 40.1 (m); HRMS (ESI) calcd for  $\text{C}_{21}\text{H}_{20}\text{D}_2\text{O}_2\text{N}$   $[\text{M}+\text{NH}_4]^+$  322.1771, found 322.1789.

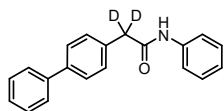

### 2-([1,1'-biphenyl]-4-yl)-*N*-phenylacetamide-2,2-d<sub>2</sub> (3f)

White solid (75%, 43.4 mg, 96% D); m.p.: 133-134 °C;  $R_f = 0.5$  (PE/acetone = 4:1); <sup>1</sup>H NMR (400 MHz, CDCl<sub>3</sub>) δ 7.64 – 7.60 (m, 4H), 7.48 – 7.37 (m, 6H), 7.31 – 7.29 (m, 2H), 7.11 – 7.06 (m, 2H); <sup>13</sup>C NMR (100 MHz, CDCl<sub>3</sub>) δ 169.1, 140.8, 140.6, 137.7, 133.4, 130.1, 129.1, 129.0, 128.1, 127.7, 127.2, 124.7, 120.0, 42.8 – 42.1 (m); HRMS (ESI) calcd for C<sub>20</sub>H<sub>15</sub>D<sub>2</sub>ON [M]<sup>+</sup> 289.1430, found 289.1425.

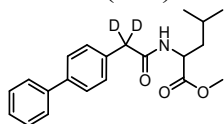

### Methyl (2-([1,1'-biphenyl]-4-yl)acetyl)leucinate-d<sub>2</sub> (3g)

White solid (73%, 49.8 mg, 95% D); m.p.: 67-68 °C;  $R_f = 0.5$  (petroleum ether/acetone = 4:1); <sup>1</sup>H NMR (400 MHz, CDCl<sub>3</sub>) δ 7.59 (d,  $J = 7.2$  Hz, 4H), 7.46 – 7.43 (m, 2H), 7.36 – 7.35 (m, 3H), 5.87 (d,  $J = 6.8$  Hz, 1H), 4.67 – 4.63 (m, 1H), 3.71 (s, 3H), 1.63 – 1.47 (m, 3H), 0.91 – 0.88 (m, 6H); <sup>13</sup>C NMR (100 MHz, CDCl<sub>3</sub>) δ 173.5, 170.8, 140.7, 140.4, 133.6, 129.9, 128.9, 127.8, 127.5, 127.2, 52.4, 50.9, 43.2 – 42.2 (m), 41.6, 25.0, 22.9, 22.1; HRMS (ESI) calcd for C<sub>18</sub>H<sub>18</sub>F<sub>2</sub>O<sub>2</sub>N [M+Na]<sup>+</sup> 364.1852, found 364.1860.

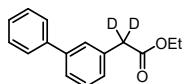

### Ethyl 2-([1,1'-biphenyl]-3-yl)acetate-d<sub>2</sub> (3h)

Colorless oil (81%, 39.2 mg, 97% D);  $R_f = 0.4$  (PE/acetone = 40:1); <sup>1</sup>H NMR (400 MHz, CDCl<sub>3</sub>) δ 7.62 (d,  $J = 6.8$  Hz, 2H), 7.56 – 7.32 (m, 2H), 7.48 – 7.36 (m, 4H), 7.32 – 7.31 (m, 1H), 4.20 (q,  $J = 6.8$  Hz, 2H), 1.30 (t,  $J = 6.8$  Hz, 3H); <sup>13</sup>C NMR (100 MHz, CDCl<sub>3</sub>) δ 171.7, 141.7, 141.1, 134.7, 129.2, 128.9, 128.3, 127.5, 127.4, 126.1, 61.1, 41.6 – 40.5 (m), 14.4; HRMS (ESI) calcd for C<sub>16</sub>H<sub>14</sub>D<sub>2</sub>O<sub>2</sub>Na [M+Na]<sup>+</sup> 265.1168, found 265.1156.

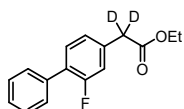

### Ethyl 2-(2-fluoro-[1,1'-biphenyl]-4-yl)acetate-d<sub>2</sub> (3i)

Colorless oil (71%, 36.9 mg, 96% D);  $R_f = 0.4$  (PE/acetone = 40:1); <sup>1</sup>H NMR (400 MHz, CDCl<sub>3</sub>) δ 7.56 (d,  $J = 7.2$  Hz, 2H), 7.47 – 7.36 (m, 4H), 7.15 – 7.12 (m, 2H), 4.20 (q,  $J = 6.8$  Hz, 2H), 1.30 (t,  $J = 6.8$  Hz, 3H); <sup>13</sup>C NMR (100 MHz, CDCl<sub>3</sub>) δ 171.1, 160.9, 158.5, 135.6, 135.4 (d,  $J = 8.1$  Hz), 130.9 (d,  $J = 3.9$  Hz), 129.1 (d,  $J = 2.8$  Hz), 128.5, 127.9 (d,  $J = 13.4$  Hz), 127.8, 125.4 (d,  $J = 2.9$  Hz), 117.1 (d,  $J = 23.6$  Hz), 61.2, 40.8 – 4.1 (m), 14.3; <sup>19</sup>F NMR (376 MHz, CDCl<sub>3</sub>) δ -117.93 (t,  $J = 9.8$  Hz). HRMS (ESI) calcd for C<sub>16</sub>H<sub>14</sub>FD<sub>2</sub>O<sub>2</sub> [M+H]<sup>+</sup> 261.1254, found 261.1255.

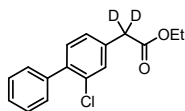

### Ethyl 2-(2-chloro-[1,1'-biphenyl]-4-yl)acetate-d<sub>2</sub> (3j)

Colorless oil (65%, 35.9 mg, 96% D);  $R_f = 0.4$  (PE/acetone = 40:1);  $^1\text{H NMR}$  (400 MHz,  $\text{CDCl}_3$ )  $\delta$  7.46 – 7.40 (m, 6H), 7.33 (d,  $J = 7.6$  Hz, 1H), 7.27 (d,  $J = 8.0$  Hz, 1H), 4.22 (q,  $J = 7.2$  Hz, 2H), 1.32 (t,  $J = 7.2$  Hz, 3H);  $^{13}\text{C NMR}$  (100 MHz,  $\text{CDCl}_3$ )  $\delta$  171.2, 139.4, 139.2, 134.8, 132.6, 131.6, 130.8, 129.6, 128.2, 127.9, 127.7, 61.3, 40.6 – 40.0 (m), 14.3; HRMS (ESI) calcd for  $\text{C}_{16}\text{H}_{13}\text{ClD}_2\text{O}_2\text{Na}$   $[\text{M}+\text{Na}]^+$  299.0778, found 299.0769.

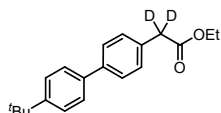

### Ethyl 2-(4-(*tert*-butyl)-[1,1'-biphenyl]-4-yl)acetate-d<sub>2</sub> (3k)

Colorless oil (79%, 47.1 mg, 97% D);  $R_f = 0.4$  (PE/acetone = 40:1);  $^1\text{H NMR}$  (400 MHz,  $\text{CDCl}_3$ )  $\delta$  7.59 – 7.55 (m, 4H), 7.50 (d,  $J = 7.2$  Hz, 2H), 7.38 (d,  $J = 6.8$  Hz, 2H), 4.21 (q,  $J = 6.8$  Hz, 2H), 1.40 (s, 9H), 1.31 (t,  $J = 6.8$  Hz, 3H);  $^{13}\text{C NMR}$  (100 MHz,  $\text{CDCl}_3$ )  $\delta$  171.8, 150.4, 134.0, 138.0, 132.9, 129.7, 127.3, 126.8, 125.8, 61.0, 41.3 – 40.1 (m), 34.6, 31.5, 14.3; HRMS (ESI) calcd for  $\text{C}_{20}\text{H}_{22}\text{D}_2\text{O}_2\text{Li}$   $[\text{M}+\text{Li}]^+$  305.2056, found 305.2070.

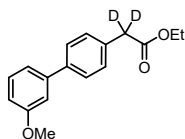

### Ethyl 2-(3'-methoxy-[1,1'-biphenyl]-4-yl)acetate-d<sub>2</sub> (3l)

Colorless oil (83%, 45.2 mg, 96% D);  $R_f = 0.4$  (PE/acetone = 30:1);  $^1\text{H NMR}$  (400 MHz,  $\text{CDCl}_3$ )  $\delta$  7.50 – 7.46 (m, 2H), 7.28 (d,  $J = 6.0$  Hz, 3H), 7.09 (d,  $J = 6.8$  Hz, 1H), 7.03 (s, 1H), 6.81 (d,  $J = 8.0$  Hz, 1H), 4.09 (q,  $J = 6.8$  Hz, 2H), 3.78 (s, 3H), 1.19 (t,  $J = 6.8$  Hz, 3H);  $^{13}\text{C NMR}$  (100 MHz,  $\text{CDCl}_3$ )  $\delta$  171.7, 160.1, 142.5, 140.0, 133.4, 129.9, 129.7, 127.5, 119.7, 112.9, 112.8, 61.0, 55.4, 41.1 – 40.1 (m), 14.3; HRMS (ESI) calcd for  $\text{C}_{17}\text{H}_{16}\text{D}_2\text{O}_3$   $[\text{M}]^+$  272.1376, found 272.1375.

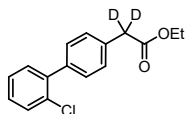

### Ethyl 2-(2'-chloro-[1,1'-biphenyl]-4-yl)acetate-d<sub>2</sub> (3m)

Colorless oil (66%, 36.4 mg, 97% D);  $R_f = 0.4$  (PE/acetone = 40:1);  $^1\text{H NMR}$  (400 MHz,  $\text{CDCl}_3$ )  $\delta$  7.52 – 7.45 (m, 3H), 7.42 – 7.29 (m, 5H), 4.23 (q,  $J = 7.2$  Hz, 2H), 1.33 (t,  $J = 7.2$  Hz, 3H);  $^{13}\text{C NMR}$  (100 MHz,  $\text{CDCl}_3$ )  $\delta$  171.6, 140.2, 138.2, 133.5, 132.5, 131.4, 130.0, 129.7, 129.0, 128.8, 128.6, 127.4, 127.1, 126.9, 61.0, 41.2 – 40.2 (m), 14.3; HRMS (ESI) calcd for  $\text{C}_{16}\text{H}_{17}\text{ClD}_2\text{O}_2\text{N}$   $[\text{M}+\text{NH}_4]^+$  294.1224, found 294.1234.

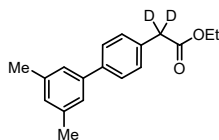

### Ethyl 2-(3',5'-dimethyl-[1,1'-biphenyl]-4-yl)acetate-d<sub>2</sub> (3n)

Colorless oil (78%, 42.1 mg, 97% D);  $R_f = 0.4$  (PE/acetone = 40:1);  $^1\text{H}$  NMR (400 MHz,  $\text{CDCl}_3$ )  $\delta$  7.59 (d,  $J = 6.0$  Hz, 2H), 7.40 (d,  $J = 6.4$  Hz, 2H), 7.25 (s, 2H), 7.04 (s, 1H), 4.23 (q,  $J = 7.2$  Hz, 2H), 2.43 (s, 6H), 1.33 (t,  $J = 7.2$  Hz, 3H);  $^{13}\text{C}$  NMR (100 MHz,  $\text{CDCl}_3$ )  $\delta$  171.7, 140.9, 140.3, 138.3, 133.0, 129.6, 129.0, 127.4, 125.1, 61.0, 41.1 – 40.1 (m), 21.5, 14.3; HRMS (ESI) calcd for  $\text{C}_{18}\text{H}_{18}\text{D}_2\text{O}_2\text{Li}$   $[\text{M}+\text{Li}]^+$  277.1743, found 277.1744.

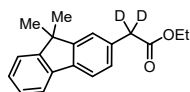

### Ethyl 2-(9,9-dimethyl-9H-fluoren-2-yl)acetate-d<sub>2</sub> (3o)

Colorless oil (68%, 38.4 mg, 98% D);  $R_f = 0.4$  (PE/acetone = 40:1);  $^1\text{H}$  NMR (400 MHz,  $\text{CDCl}_3$ )  $\delta$  7.75 – 7.71 (m, 2H), 7.47 (d,  $J = 6.4$  Hz, 1H), 7.4 (m, 1H), 7.37 – 7.30 (m, 3H), 4.22 (q,  $J = 7.2$  Hz, 2H), 1.53 (s, 6H), 1.31 (t,  $J = 7.2$  Hz, 3H);  $^{13}\text{C}$  NMR (100 MHz,  $\text{CDCl}_3$ )  $\delta$  171.9, 154.1, 153.8, 139.0, 138.3, 133.2, 128.1, 127.3, 127.1, 123.7, 122.6, 120.1, 120.0, 60.9, 46.9, 41.4 – 40.8 (m), 27.2, 14.3; HRMS (ESI) calcd for  $\text{C}_{19}\text{H}_{18}\text{D}_2\text{O}_2\text{Li}$   $[\text{M}+\text{Li}]^+$  289.1743, found 289.1757.

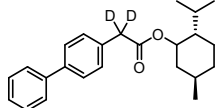

### 2-Isopropyl-5-methylcyclohexyl 2-([1,1'-biphenyl]-4-yl)acetate-d<sub>2</sub> (3p)

Colorless oil (66%, 46.5 mg, 97% D, dr = 1:1);  $R_f = 0.5$  (PE/acetone = 50:1);  $^1\text{H}$  NMR (400 MHz,  $\text{CDCl}_3$ )  $\delta$  7.63 – 7.57 (m, 4H), 7.47 (t,  $J = 7.2$  Hz, 2H), 7.38 (d,  $J = 7.2$  Hz, 3H), 4.76 – 4.70 (m, 2H), 2.07 (s, 1H), 2.03 (d,  $J = 12.0$  Hz, 1H), 1.94 – 1.87 (m, 1H), 1.81 – 1.77 (m, 1H), 1.69 (s, 1H), 1.51 (s, 1H), 1.40 (t,  $J = 10.8$  Hz, 1H), 1.08 – 1.00 (m, 1H), 0.93 (d,  $J = 6.0$  Hz, 3H), 0.88 (d,  $J = 6.8$  Hz, 3H), 0.80 (d,  $J = 6.8$  Hz, 1H), 0.73 (d,  $J = 6.8$  Hz, 2H);  $^{13}\text{C}$  NMR (100 MHz,  $\text{CDCl}_3$ )  $\delta$  171.3, 170.8, 141.0, 140.0, 133.5, 129.7, 128.9, 127.4, 127.2, 74.9, 47.2, 40.9, 41.1 – 40.8 (m), 34.4, 31.5, 26.3, 23.5, 22.2, 20.9, 16.4; HRMS (ESI) calcd for  $\text{C}_{24}\text{H}_{28}\text{D}_2\text{O}_2\text{Na}$   $[\text{M}+\text{Na}]^+$  375.2264, found 375.2257.

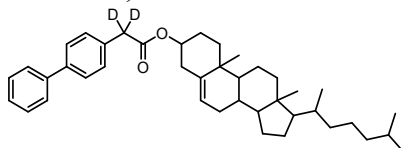

### 10,13-Dimethyl-17-(6-methylheptan-2-yl)-2,3,4,7,8,9,10,11,12,13,14,15,16,17-tetradecahydro-1H-cyclopenta[a]phenanthren-3-yl 2-([1,1'-biphenyl]-4-yl)acetate-d<sub>2</sub> (3q)

White solid (50%, 58.2 mg, 96% D); m.p.: 98-99 °C;  $R_f = 0.4$  (PE/acetone = 40:1);  $^1\text{H}$  NMR (400 MHz,  $\text{CDCl}_3$ )  $\delta$  7.64 – 7.60 (m, 4H), 7.48 (t,  $J = 7.2$  Hz, 2H), 7.42 – 7.36 (m, 3H), 5.42 (s, 1H), 4.74 – 4.67 (m, 1H), 2.39 (d,  $J = 7.2$  Hz, 2H), 2.08 – 1.90 (m,

6H), 1.71 – 1.49 (m, 8H), 1.40 – 1.30 (m, 5H), 1.18 – 1.14 (m, 6H), 1.09 – 1.04 (m, 5H), 0.98 – 0.92 (m, 8H), 0.73 (s, 3H); <sup>13</sup>C NMR (100 MHz, CDCl<sub>3</sub>) δ 171.1, 140.9, 140.0, 139.7, 133.4, 129.7, 128.9, 127.4, 127.3, 127.2, 122.8, 74.6, 56.8, 56.2, 50.1, 42.4, 41.2 – 40.6 (m), 39.8, 39.6, 38.2, 37.1, 36.7, 36.3, 35.9, 32.01, 31.96, 28.4, 28.1, 27.9, 24.4, 24.0, 23.0, 22.7, 21.2, 19.5, 18.9, 12.0; HRMS (ESI) calcd for C<sub>41</sub>H<sub>54</sub>D<sub>2</sub>O<sub>2</sub> [M]<sup>+</sup> 582.4400, found 582.4415.

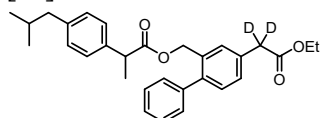

**(4-(2-Ethoxy-2-oxoethyl-1,1-d<sub>2</sub>)-[1,1'-biphenyl]-2-yl)methyl-2-(4-isobutylphenyl)propanoate (3r)**

Colorless oil (67%, 61.7 mg, 96% D); R<sub>f</sub> = 0.3 (PE/acetone = 40:1); <sup>1</sup>H NMR (400 MHz, CDCl<sub>3</sub>) δ 7.33 – 7.32 (m, 4H), 7.28 – 7.22 (m, 6H), 7.14 (d, *J* = 7.2 Hz, 2H), 5.02 (q, *J* = 12.4 Hz, 2H), 4.22 (q, *J* = 6.0 Hz, 2H), 3.75 (q, *J* = 6.0 Hz, 1H), 2.50 (d, *J* = 6.4 Hz, 2H), 1.97 – 1.82 (m, 1H), 1.51 (d, *J* = 6.0 Hz, 3H), 1.32 (t, *J* = 7.2 Hz, 3H), 0.94 (d, *J* = 6.0 Hz, 6H); <sup>13</sup>C NMR (100 MHz, CDCl<sub>3</sub>) δ 174.4, 171.6, 141.2, 140.7, 140.1, 137.7, 133.5, 133.4, 130.5, 130.4, 129.5, 129.2, 129.1, 128.3, 127.4, 127.4, 64.7, 61.1, 45.2, 45.2, 41.1 – 40.2 (m), 30.3, 22.5, 18.5, 14.3; HRMS (ESI) calcd for C<sub>30</sub>H<sub>32</sub>D<sub>2</sub>O<sub>4</sub>Na [M+Na]<sup>+</sup> 483.2475, found 483.2489.

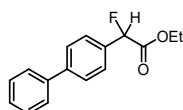

**Ethyl 2-([1,1'-biphenyl]-4-yl)-2-fluoroacetate (4a)<sup>[1]</sup>**

Colorless oil (79%, 40.8 mg); R<sub>f</sub> = 0.5 (PE/acetone = 4:1); <sup>1</sup>H NMR (400 MHz, CDCl<sub>3</sub>) δ 7.66 – 7.55 (m, 6H), 7.48 – 7.37 (m, 2H), 7.40 – 7.33 (m, 1H), 5.84 (d, *J* = 47.6 Hz, 1H), 4.36 – 4.21 (m, 2H), 1.30 (d, *J* = 6.4 Hz, 3H); <sup>13</sup>C NMR (100 MHz, CDCl<sub>3</sub>) δ 168.7 (d, *J* = 27.4 Hz), 142.7 (d, *J* = 2.2 Hz), 140.4, 133.3 (d, *J* = 20.5 Hz), 129.0, 127.8, 127.6, 127.3, 127.2, 90.3, 88.4, 62.0, 14.2; <sup>19</sup>F NMR (376 MHz, CDCl<sub>3</sub>) δ -179.38 (d, *J* = 47.8 Hz). Characterization data consistent with reported data<sup>[1]</sup>.

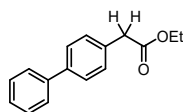

**Ethyl 2-([1,1'-biphenyl]-4-yl)acetate (4b)<sup>[3b]</sup>**

Colorless oil (82%, 39.4 mg); R<sub>f</sub> = 0.5 (PE/acetone = 4:1); <sup>1</sup>H NMR (400 MHz, CDCl<sub>3</sub>) δ 7.61 – 7.56 (m, 4H), 7.47 – 7.43 (m, 2H), 7.39 – 7.34 (m, 3H), 4.19 (q, *J* = 6.8 Hz, 2H), 3.67 (s, 2H), 1.29 (t, *J* = 6.8 Hz, 3H); <sup>13</sup>C NMR (100 MHz, CDCl<sub>3</sub>) δ 171.7, 140.9, 140.1, 133.2, 129.7, 128.8, 127.4, 127.3, 127.1, 61.0, 41.1, 14.3. Characterization data consistent with reported data<sup>[3b]</sup>.

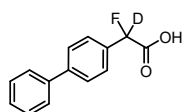

**2-([1,1'-biphenyl]-4-yl)-2-fluoroacetic-2-d acid (5a)**

White solid (80%, 33.7 mg, 89% D); m.p.: 131-132 °C; R<sub>f</sub> = 0.5 (PE/acetone = 4:1); <sup>1</sup>H NMR (400 MHz, DMSO-*d*<sub>6</sub>) δ 7.75 – 7.67 (m, 4H), 7.56 (d, *J* = 7.6 Hz, 2H), 7.50



– 7.46 (m, 1H), 7.41 – 7.37 (m, 1H);  $^{19}\text{F}$  NMR (376 MHz, DMSO)  $\delta$  -175.62 – -176.28 (m);  $^{13}\text{C}$  NMR (100 MHz, DMSO)  $\delta$  169.8 (d,  $J = 27.0$  Hz), 141.3 (d,  $J = 2.3$  Hz), 139.5, 134.1 (d,  $J = 19.9$  Hz), 129.0, 127.9, 127.6 (d,  $J = 5.4$  Hz), 127.1, 126.8, 88.17 (dt,  $J = 177.1, 20.6$  Hz); HRMS (ESI) calcd for  $\text{C}_{14}\text{H}_{10}\text{FDO}_2\text{K}$   $[\text{M}+\text{K}]^+$  270.0437, found 270.0425.

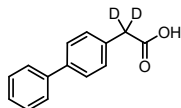

**2-([1,1'-Biphenyl]-4-yl)acetic-2,2-d<sub>2</sub> acid (5b)**

White solid (82%, 35.1 mg, 90% D);  $R_f = 0.5$  (PE/EtOAc = 4:1);  $^1\text{H}$  NMR (400 MHz, DMSO)  $\delta$  12.31 (s, 1H), 7.58 – 7.52 (m, 4H), 7.39 – 7.36 (m, 2H), 7.28 (d,  $J = 7.2$  Hz, 3H);  $^{13}\text{C}$  NMR (100 MHz, DMSO- $d_6$ )  $\delta$  173.1, 140.4, 139.0, 134.7, 130.4, 129.4, 127.8, 127.0. Characterization data consistent with reported data<sup>[3a]</sup>.

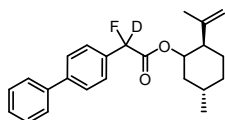

**(2R,5S)-5-methyl-2-(prop-1-en-2-yl)cyclohexyl-2-([1,1'-biphenyl]-4-yl)-2-fluoroacetate-d (6)**

Colorless oil (80%, 29.4 mg, 89% D);  $R_f = 0.5$  (PE/EtOAc = 25:1);  $^1\text{H}$  NMR (400 MHz,  $\text{CDCl}_3$ )  $\delta$  7.63 – 7.58 (m, 4H), 7.52 – 7.44 (m, 4H), 7.39 – 7.36 (m, 1H), 4.94 – 4.85 (m, 1H), 4.74 (d,  $J = 7.2$  Hz, 1H), 4.42 (d,  $J = 26.4$  Hz, 1H), 2.18 – 2.02 (m, 1H), 1.93 – 1.91 (m, 1H), 1.75 – 1.68 (m, 1H), 1.65 (s, 3H), 1.58 – 1.57 (m, 1H), 1.40 (s, 3H), 1.37– 1.30 (m, 1H), 1.09 – 1.01 (m, 1H), 0.94– 1.30 (m, 2H);  $^{13}\text{C}$  NMR (100 MHz,  $\text{CDCl}_3$ )  $\delta$  168.0 (d,  $J = 27.4$  Hz), 168.0 (d,  $J = 26.8$  Hz), 145.7, 145.1, 142.40, 142.38, 140.5, 140.4, 133.4 (d,  $J = 20.2$  Hz), 133.3 (d,  $J = 20.1$  Hz), 128.9, 127.7, 127.7, 127.4, 127.3, 127.32, 127.25, 112.3, 112.1, 88.99 (dt,  $J = 154.8, 22.4$  Hz), 88.98 (dt,  $J = 155.9, 21.7$  Hz), 75.4, 75.3, 50.6, 50.5, 40.3, 39.9, 34.9, 34.0, 33.9, 31.39, 31.36, 30.5, 30.3, 25.5, 24.7, 22.0, 21.9, 19.4, 19.3;  $^{19}\text{F}$  NMR (376 MHz,  $\text{CDCl}_3$ )  $\delta$  -178.48 – -179.93 (m); HRMS (ESI) calcd for  $\text{C}_{24}\text{H}_{26}\text{FDO}_2\text{K}$   $[\text{M}+\text{K}]^+$  406.1689, found 406.1698.

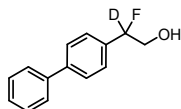

**2-([1,1'-Biphenyl]-4-yl)-2-fluoroethan-2-d-1-ol (7a)**

White solid (86%, 37.3 mg, 92% D); m.p.: 97-98 °C;  $R_f = 0.5$  (PE/EtOAc = 4:1);  $^1\text{H}$  NMR (400 MHz,  $\text{CDCl}_3$ )  $\delta$  7.70 – 7.62 (m, 4H), 7.49 – 7.41 (m, 5H), 4.05 – 3.85 (m, 2H), 2.44 (s, 1H);  $^{13}\text{C}$  NMR (100 MHz,  $\text{CDCl}_3$ )  $\delta$  141.88 (d,  $J = 1.3$  Hz), 140.6, 135.5, 135.3, 129.0, 127.7, 127.4, 127.2, 126.4, 126.3, 94.37 (dt,  $J = 170.0, 23.5$  Hz), 66.47 (d,  $J = 24.8$  Hz);  $^{19}\text{F}$  NMR (376 MHz,  $\text{CDCl}_3$ )  $\delta$  -186.17 – -187.00 (m); HRMS (ESI) calcd for  $\text{C}_{14}\text{H}_{12}\text{FDONa}$   $[\text{M}+\text{Na}]^+$  240.0905, found 240.0910.

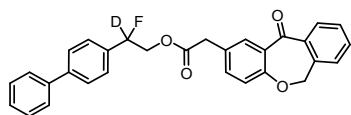

**2-([1,1'-Biphenyl]-4-yl)-2-fluoroethyl-2-d-2-(11-oxo-6,11-dihydrodibenzo[b,e]oxepin-2-yl)acetate (7b)**

Colorless oil (88%, 41.1 mg, 92% D);  $R_f = 0.5$  (PE/EtOAc = 4:1);  $^1\text{H NMR}$  (400 MHz,  $\text{CDCl}_3$ )  $\delta$  8.14 (s, 1H), 7.90 (d,  $J = 7.2$  Hz, 1H), 7.61 – 7.54 (m, 5H), 7.49 – 7.35 (m, 8H), 7.03 (d,  $J = 8.0$  Hz, 1H), 5.17 (s, 2H), 4.51 – 4.37 (m, 2H), 3.73 (s, 2H);  $^{13}\text{C NMR}$  (100 MHz,  $\text{CDCl}_3$ )  $\delta$  190.9, 171.3, 160.7, 142.1, 140.5 (d,  $J = 5.6$  Hz), 136.5, 135.7, 134.7 (d,  $J = 19.8$  Hz), 132.9, 132.7, 129.6, 129.4, 129.0, 127.9, 127.7, 127.5, 127.3, 126.4, 126.4, 125.3, 121.3, 91.1 (dt,  $J = 175.9, 23.2$  Hz), 73.7, 67.3, 67.0, 40.1;  $^{19}\text{F NMR}$  (376 MHz,  $\text{CDCl}_3$ )  $\delta$  -183.90 – -184.73 (m); HRMS (ESI) calcd for  $\text{C}_{30}\text{H}_{22}\text{FDO}_4\text{Li}$   $[\text{M}+\text{Li}]^+$  474.1798, found 474.1778.

## 7. References

1. S. Mizuta, I. S. R. Stenhagen, M. O'Duill, J. Wolstenhulme, A. K. Kirjavainen, S. J. Forsback, M. Tredwell, G. Sandford, P. R. Moore, M. Huiban, S. K. Luthra, J. Passchier, O. Solin and V. Gouverneur, *Org. Lett.* **2013**, 15, 2648-2651.
2. Z.-H. Yuan, H. Xin, L. Zhang, P. Gao, Xu. Yang, X.-H. Duan and L.-N. Guo, *Green Chem.* **2023**, 25, 6733-6738.
3. (a) M. Peng, H. Li, Z. Qin, J. Li, Y. Sun, X. Zhang, L. Jiang, D. Hainam and J. An, *Adv. Synth. Catal.* **2022**, 364, 2184-2186; (b) Y. Lan, D.-G. Yu, *Chem. Sci.* **2018**, 9, 4873-4878.
4. M. Silvi, E. Arceo, I. D. Jurberg, C. Cassani, P. Melchiorre, *J. Am. Chem. Soc.* **2015**, 137, 6120-6123.
5. L. Buzzetti, G. E. M. Crisenza, P. Melchiorre, *Angew. Chem., Int. Ed.* **2019**, 58, 3730-3747.

## 8. $^1\text{H}$ NMR, $^{13}\text{C}$ NMR and $^{19}\text{F}$ NMR Spectra of Products 2, 3 - 7 and

### Materials 1

$^1\text{H}$ ,  $^{13}\text{C}$  NMR and  $^{19}\text{F}$  spectra for compound 2a (Chloroform-d)

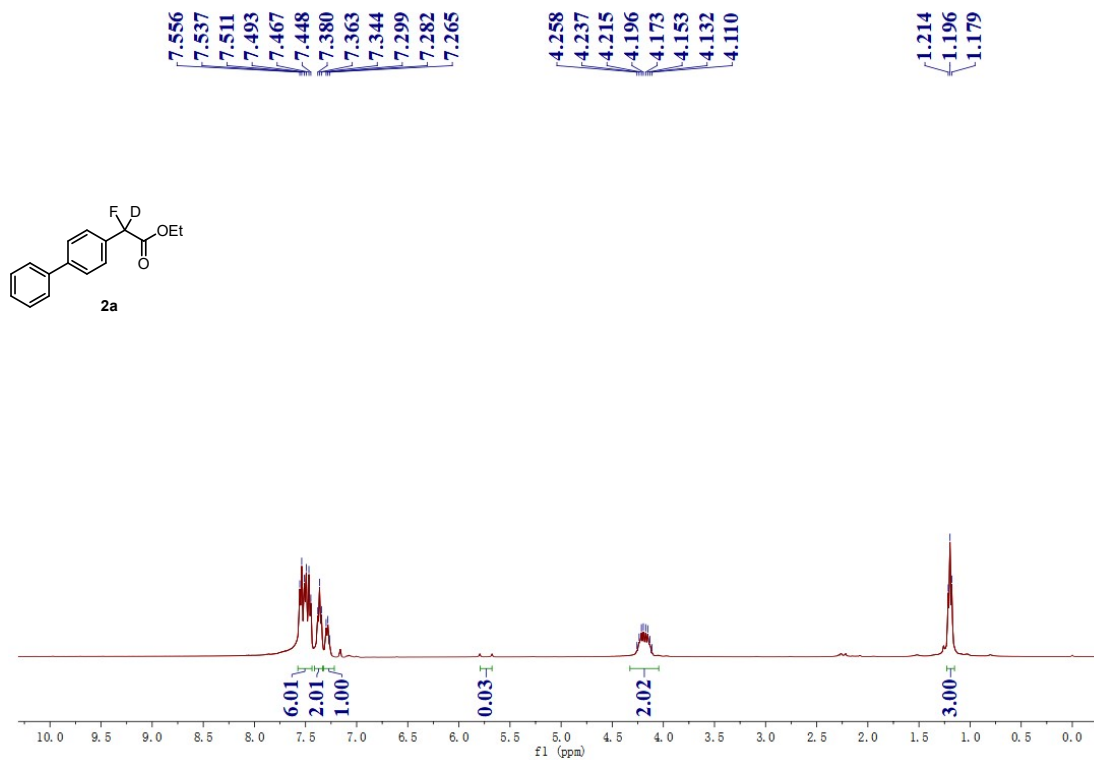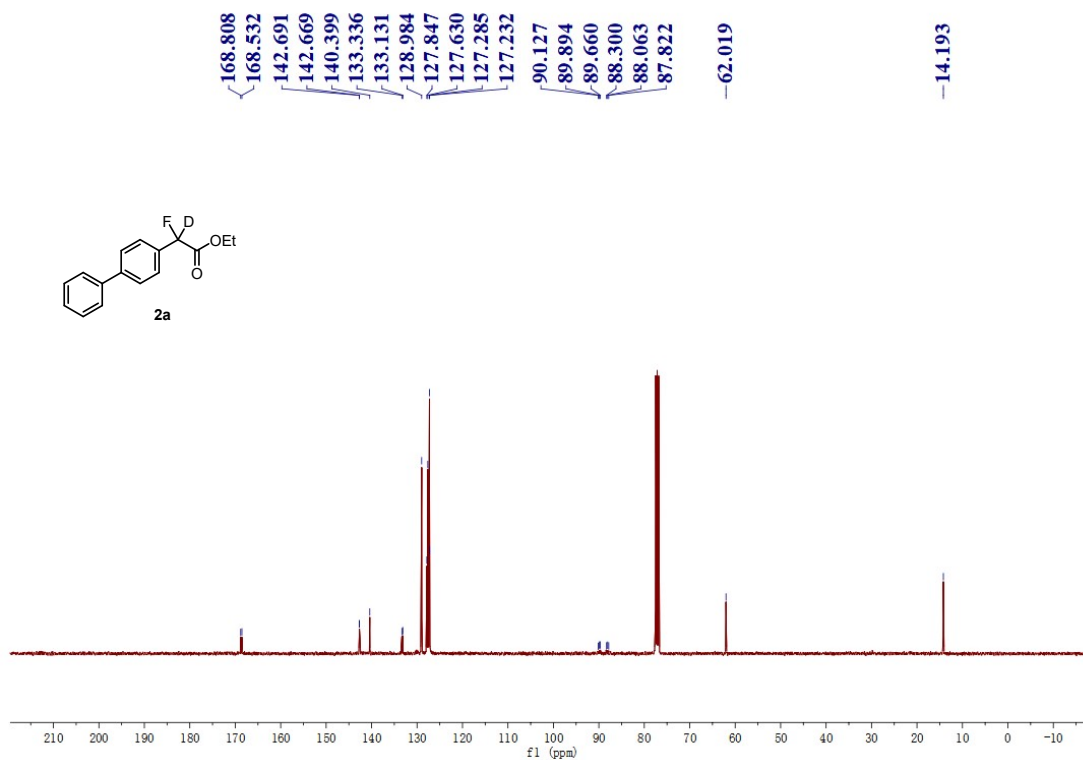

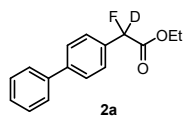

179.362  
179.491  
179.998  
180.017  
180.035

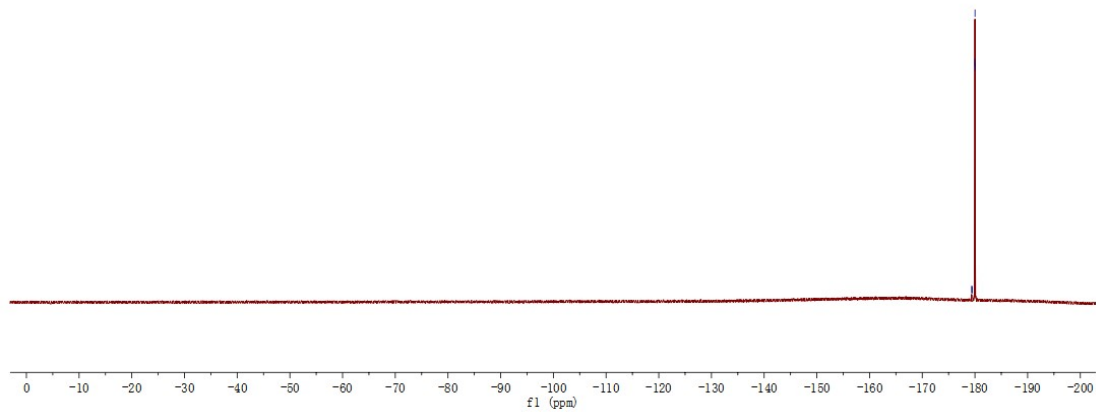

**<sup>1</sup>H, <sup>13</sup>C NMR and <sup>19</sup>F spectra for compound 2b (Chloroform-d)**

7.650 7.631 7.604 7.584 7.577 7.554 7.473 7.452 7.437 7.391 7.373 7.356 5.913 5.794 4.115 4.087 4.068 4.039 4.021 3.993 1.182 1.165 1.152 1.136 1.118 0.571 0.554 0.286 0.280

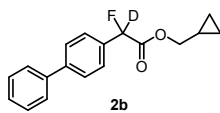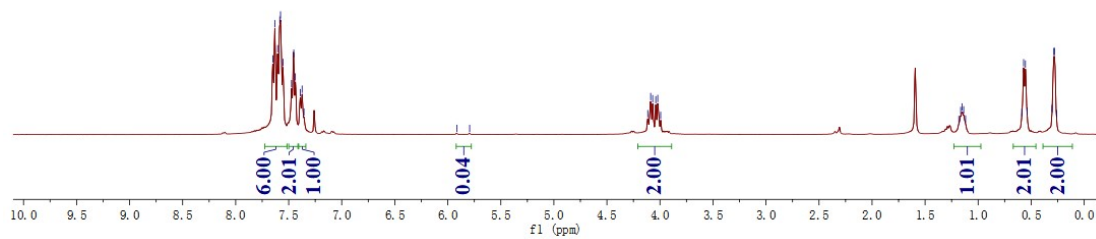

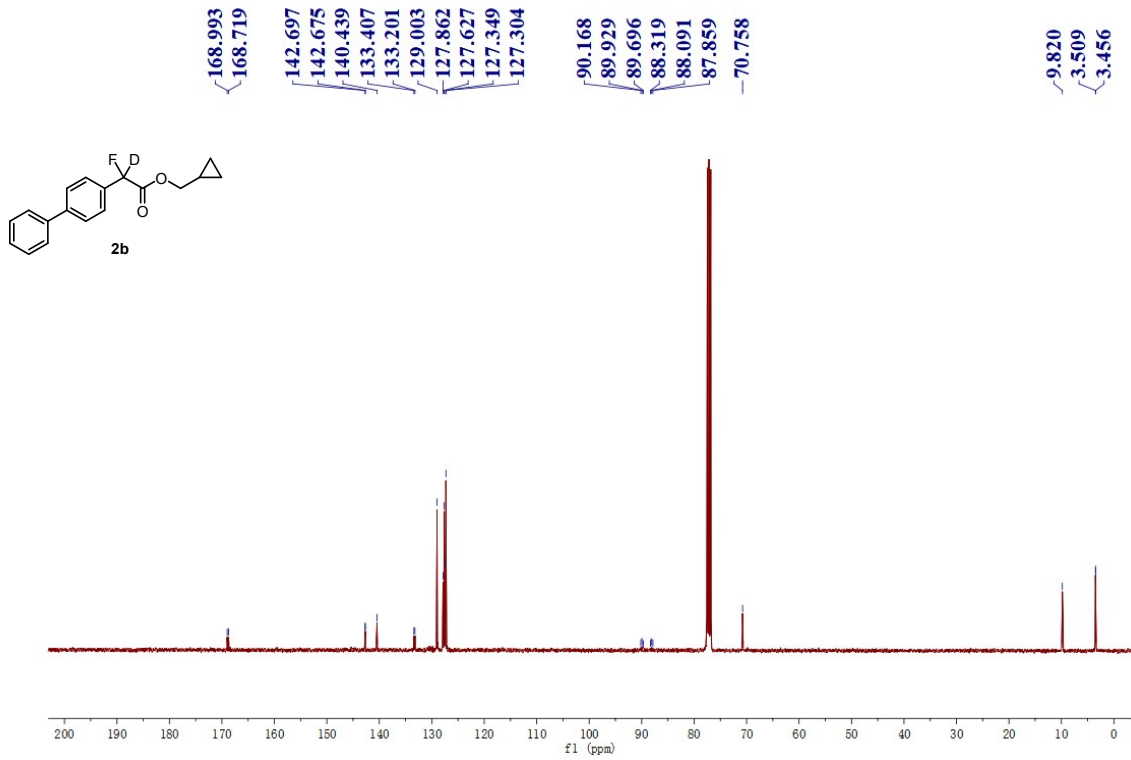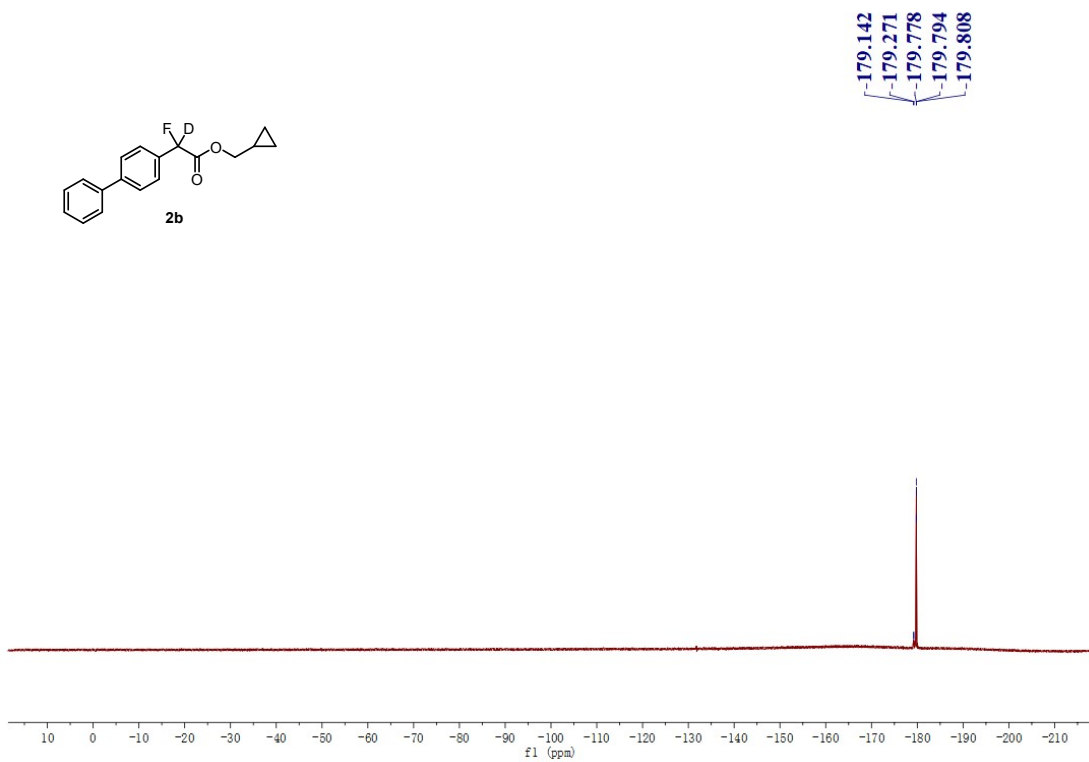

**<sup>1</sup>H, <sup>13</sup>C NMR and <sup>19</sup>F spectra for compound 2c (Chloroform-d)**

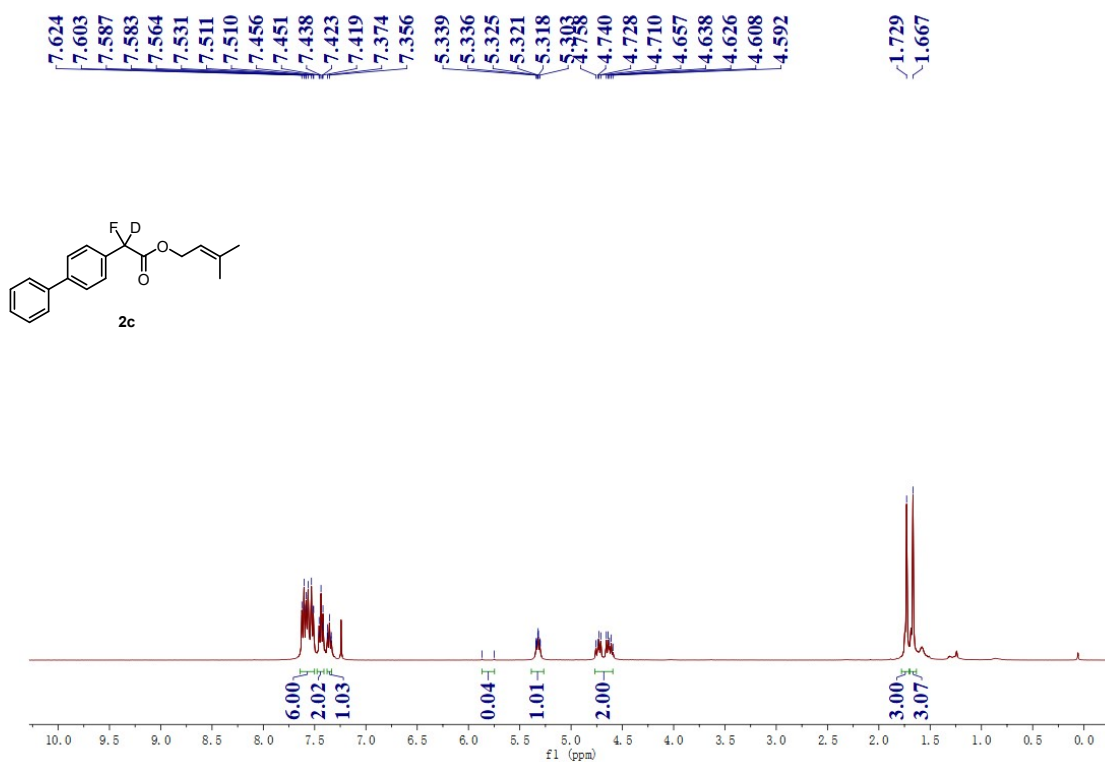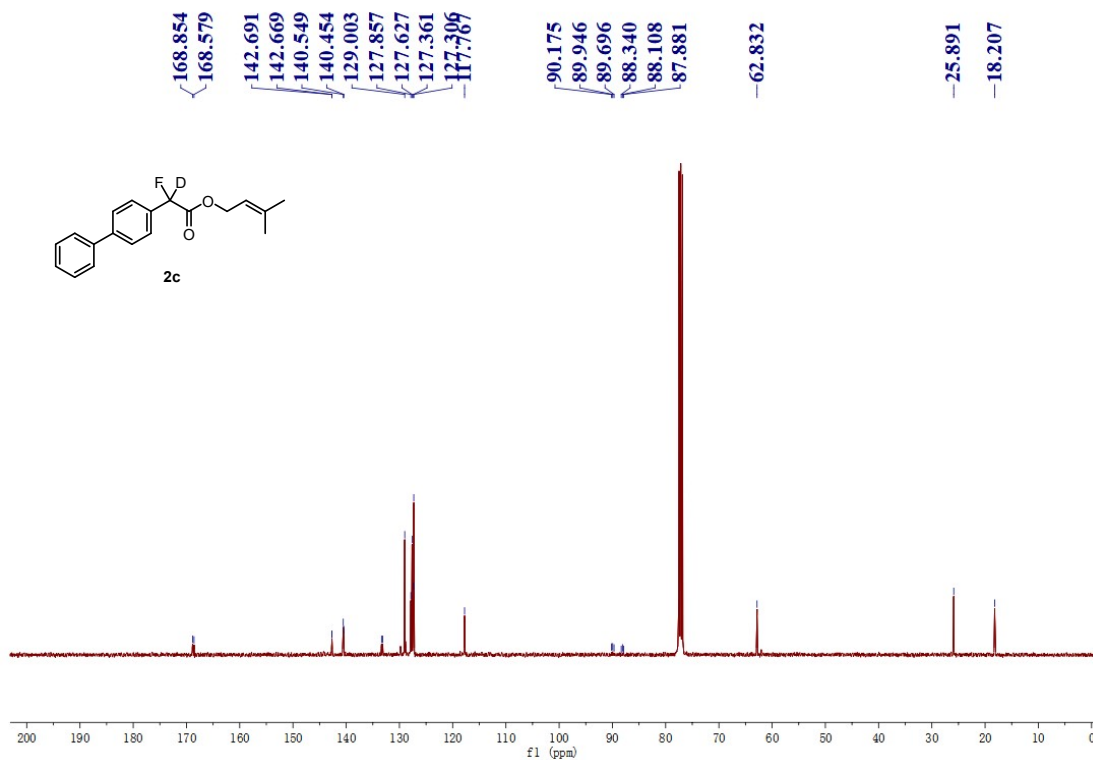

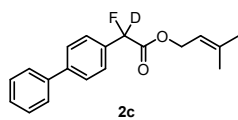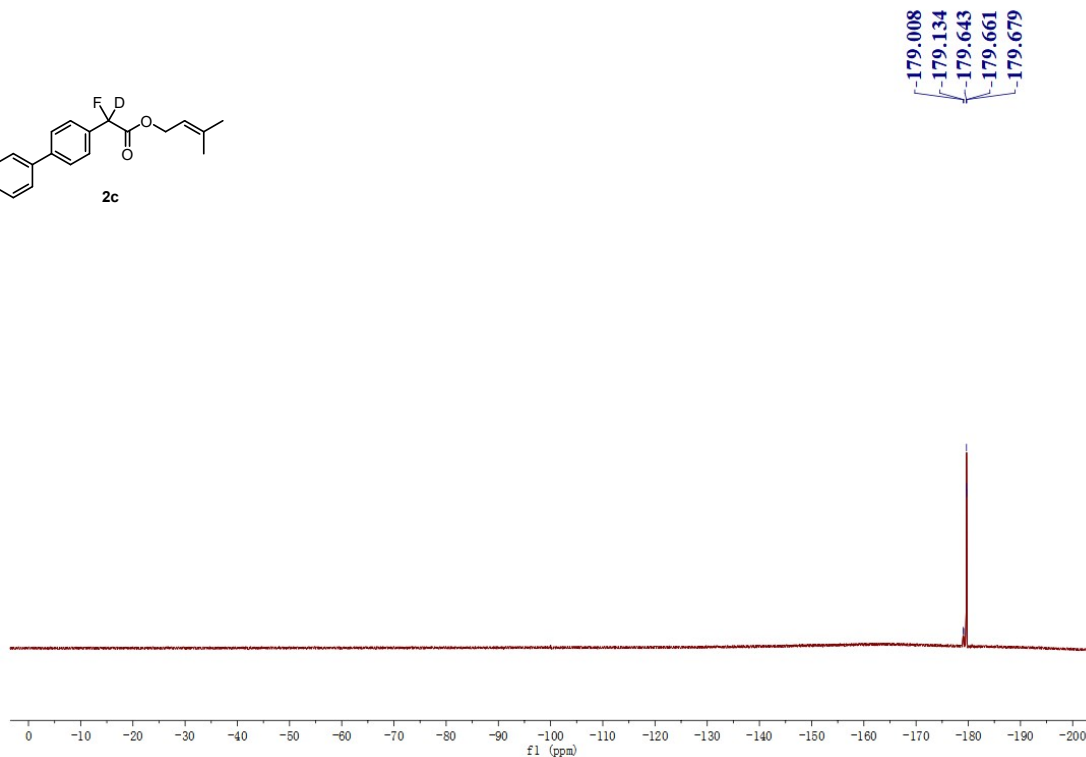

<sup>1</sup>H, <sup>13</sup>C NMR and <sup>19</sup>F spectra for compound 2d (Chloroform-d)

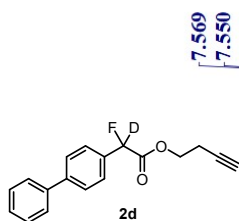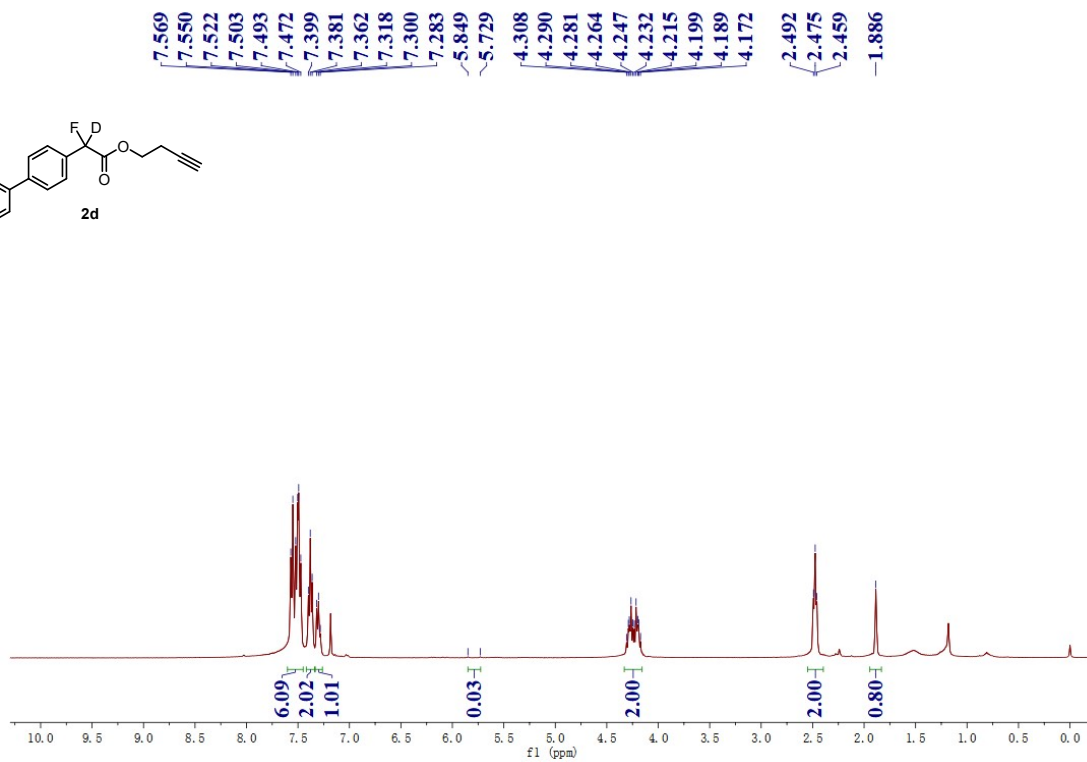



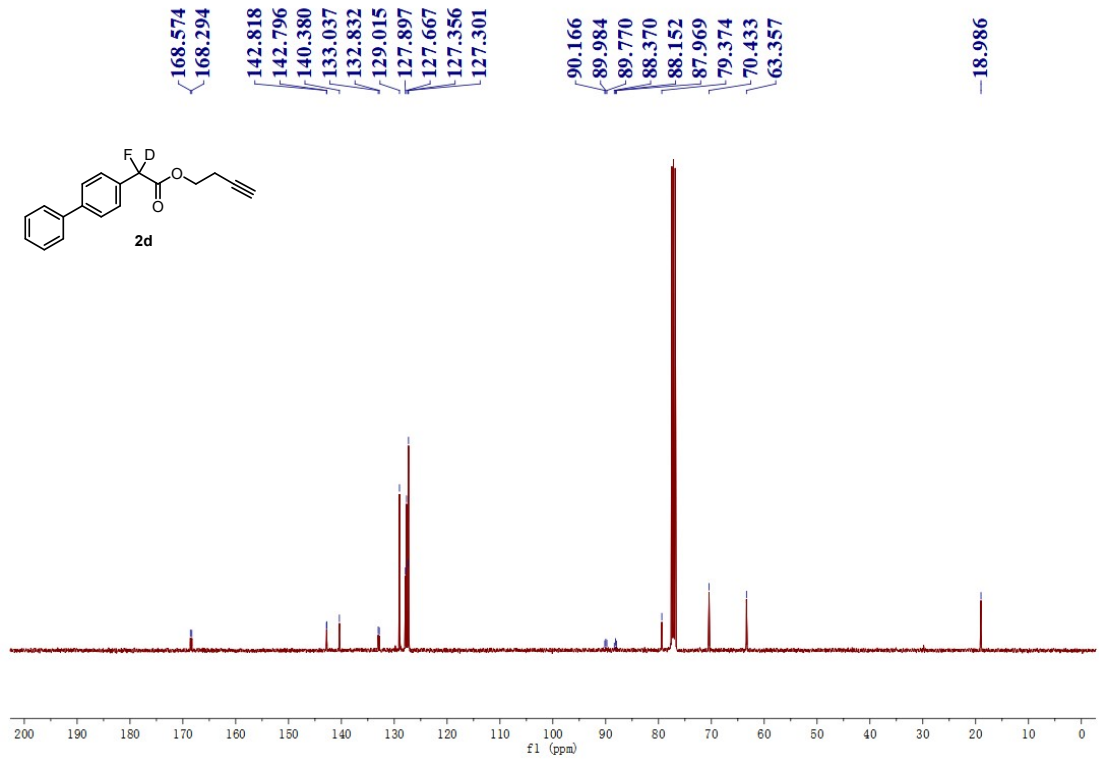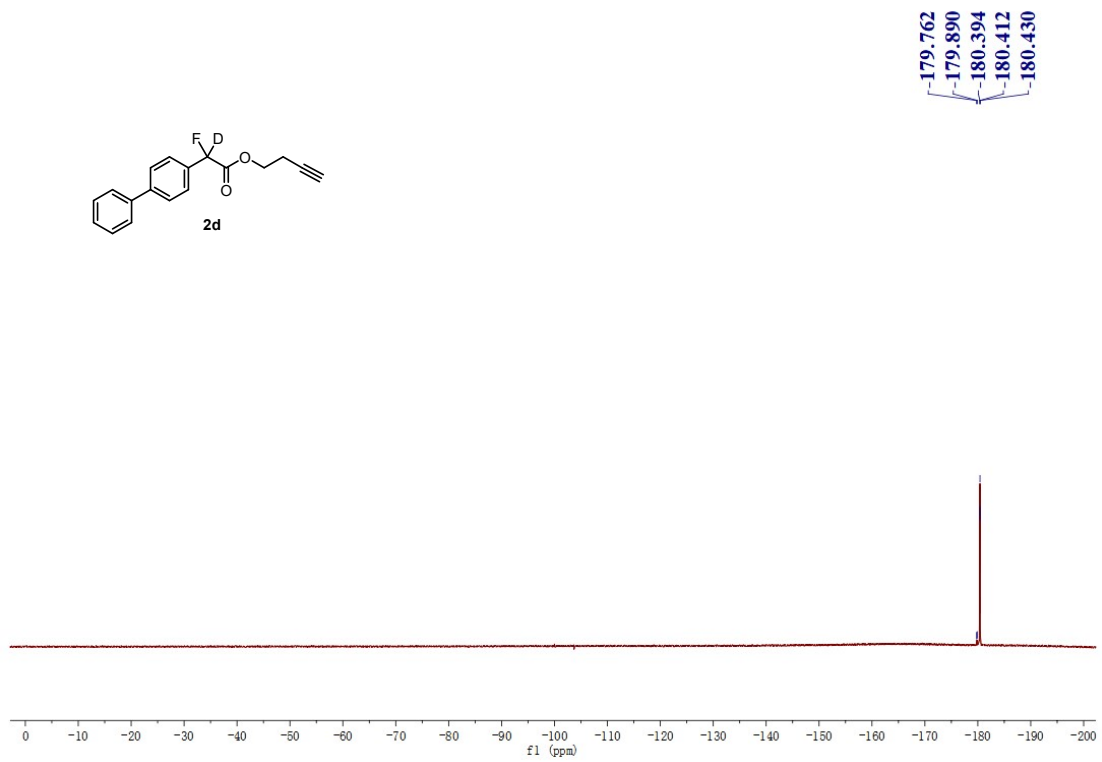

**$^1\text{H}$ ,  $^{13}\text{C}$  NMR and  $^{19}\text{F}$  spectra for compound 2e (Chloroform-d)**

7.644  
7.622  
7.613  
7.595  
7.551  
7.533  
7.489  
7.472  
7.453  
7.409  
7.391  
7.341  
7.308  
5.946  
5.826  
5.308  
5.278  
5.224  
5.193

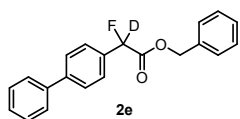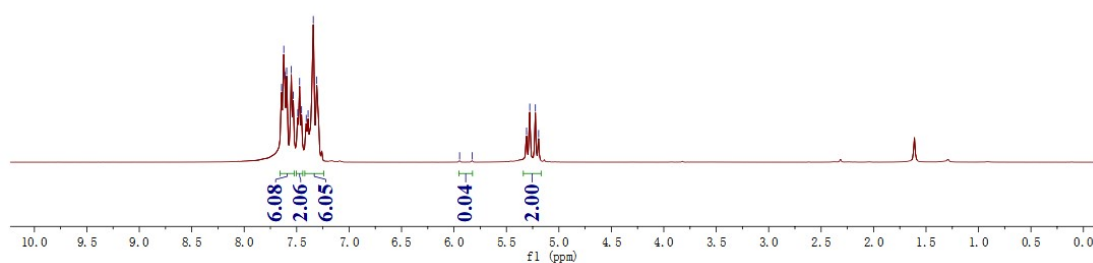

168.645  
168.366  
142.772  
142.751  
140.391  
135.040  
128.999  
128.730  
128.664  
128.341  
127.874  
127.644  
127.349  
96.104  
89.862  
89.625  
88.264  
88.030  
87.785  
-67.480

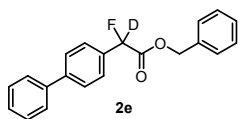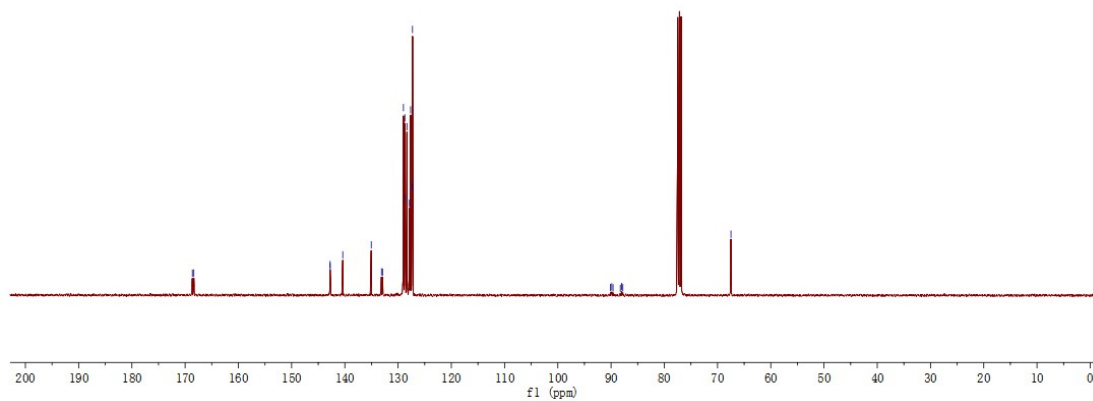

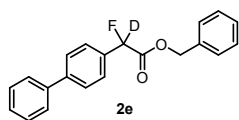

179.388  
179.514  
180.027  
180.042  
180.056

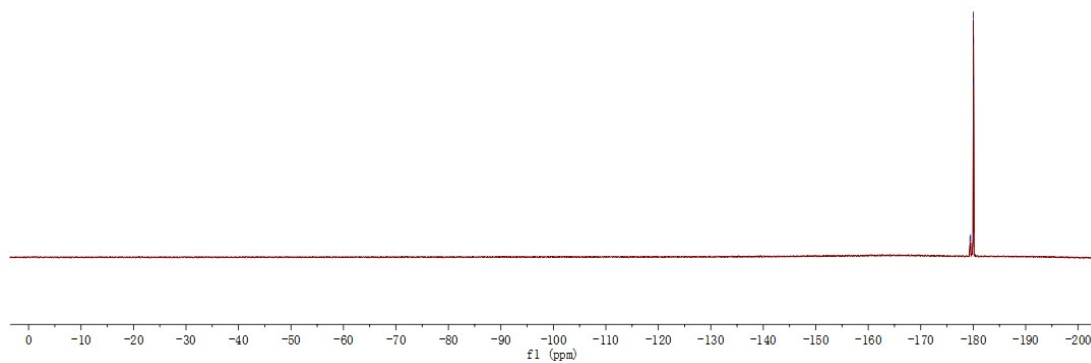

**<sup>1</sup>H, <sup>13</sup>C NMR and <sup>19</sup>F spectra for compound 2f (Chloroform-d)**

8.238  
7.658  
7.640  
7.612  
7.584  
7.475  
7.458  
7.441  
7.391  
7.373  
7.354  
7.198  
7.180  
7.163

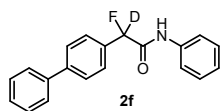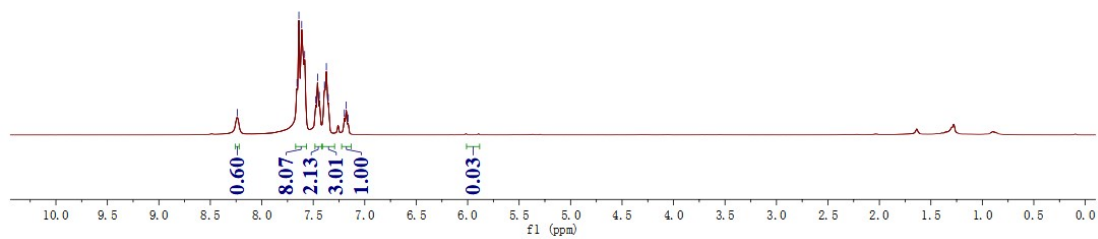

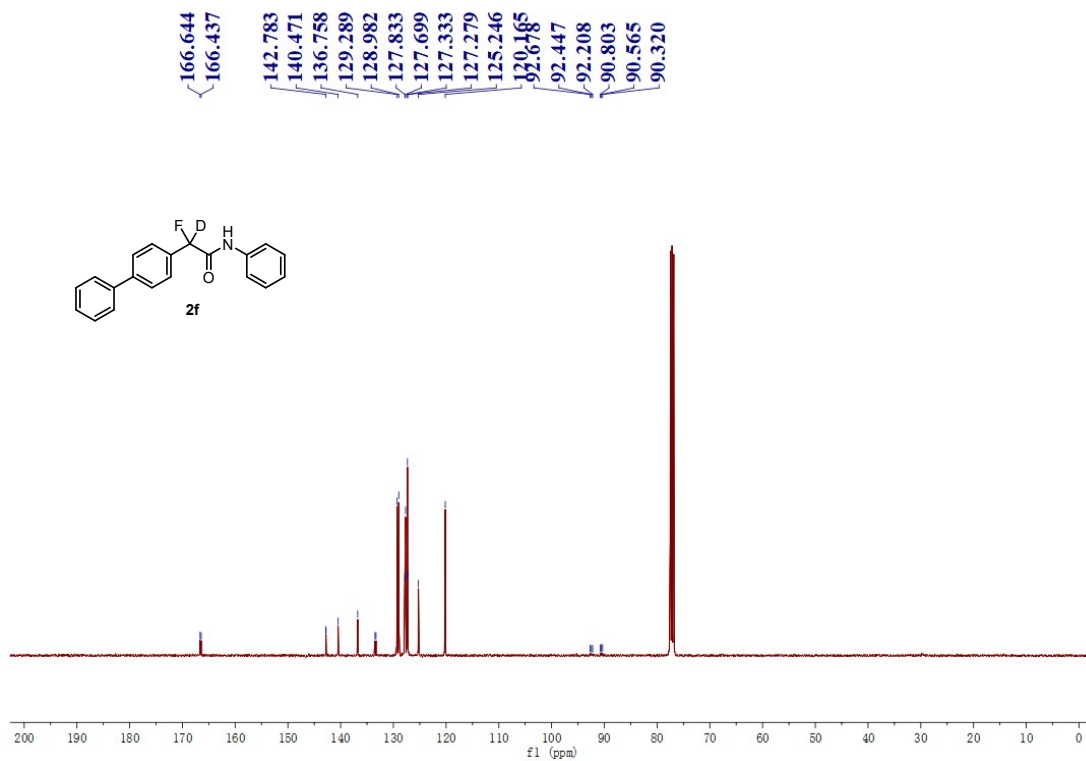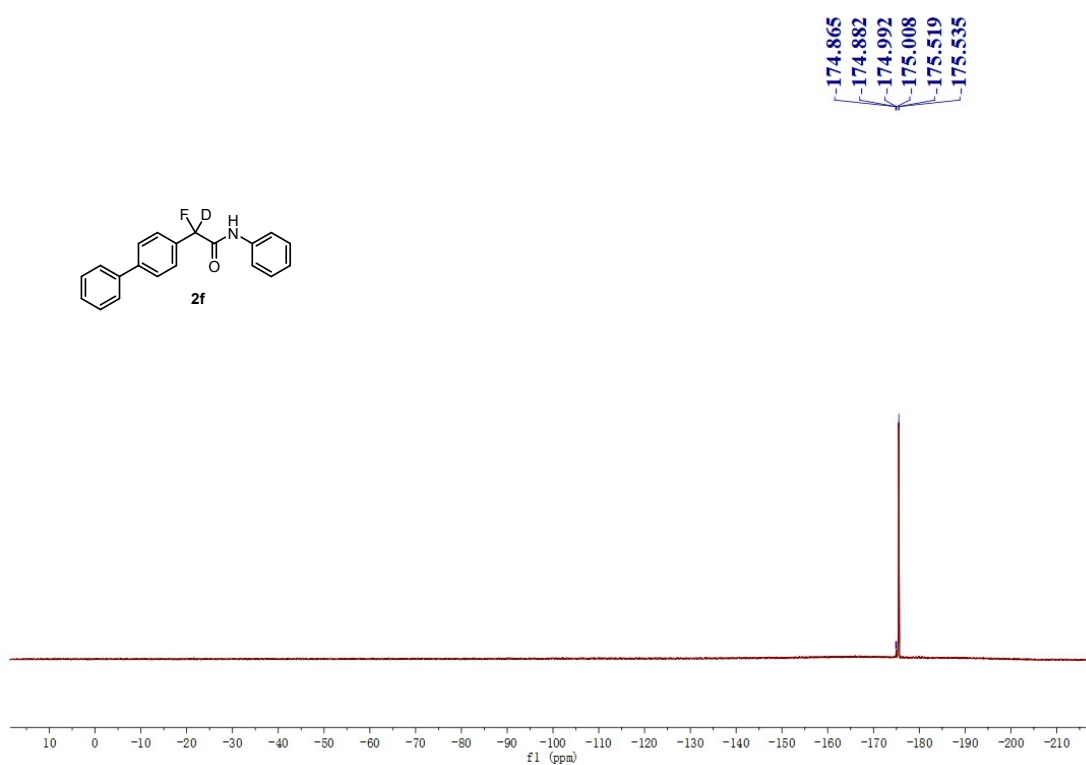

<sup>1</sup>H, <sup>13</sup>C NMR and <sup>19</sup>F spectra for compound 2g (Chloroform-d)

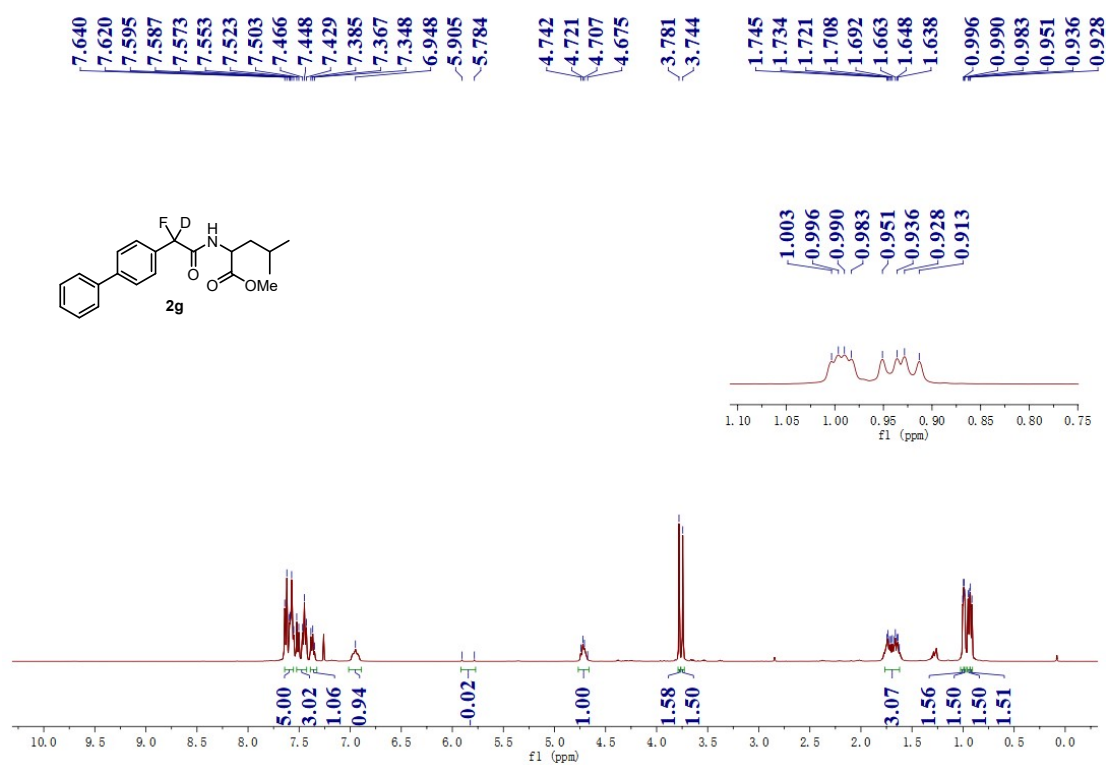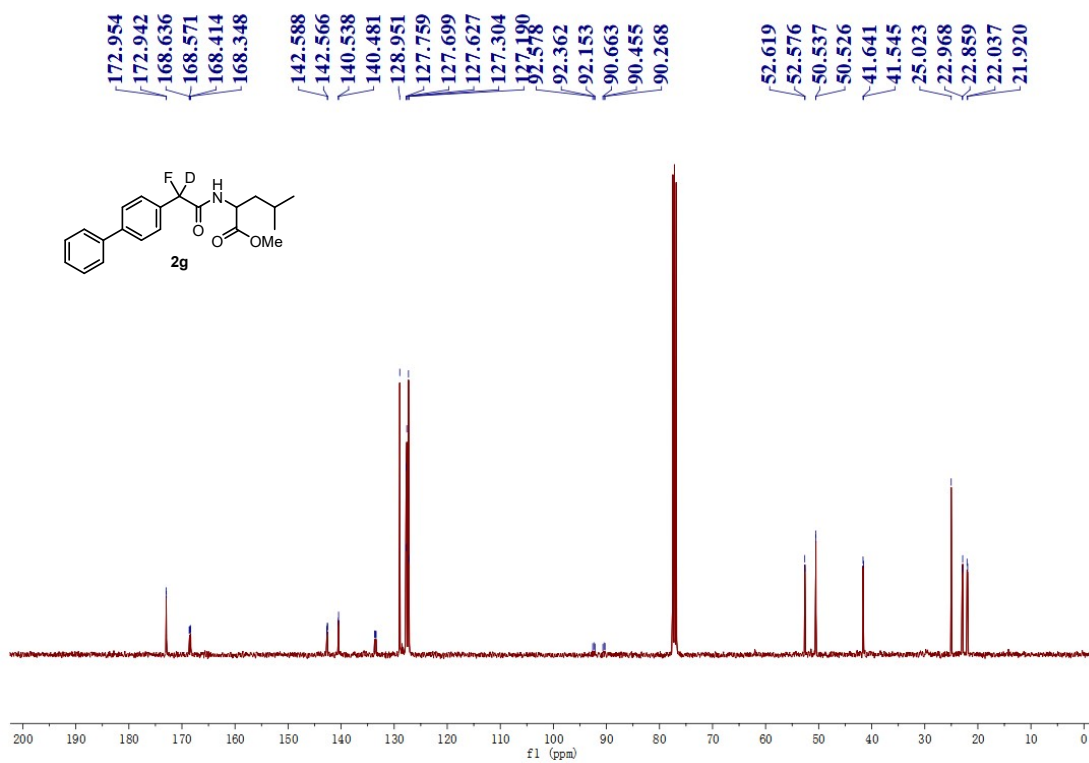



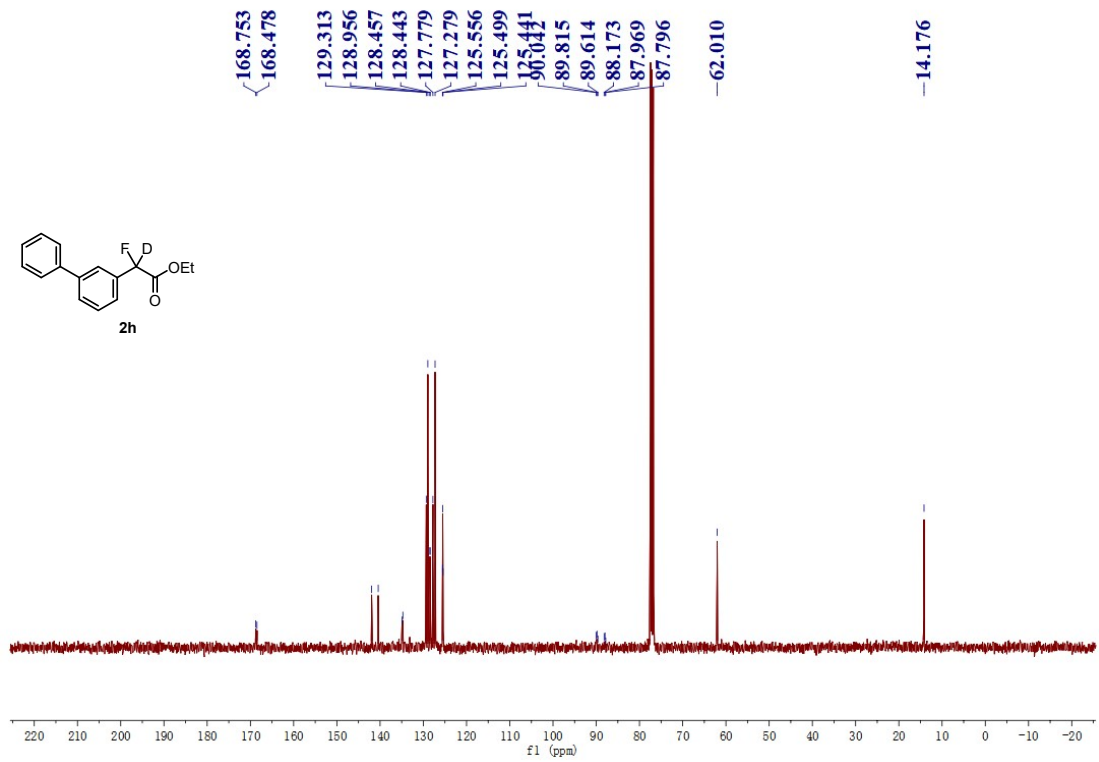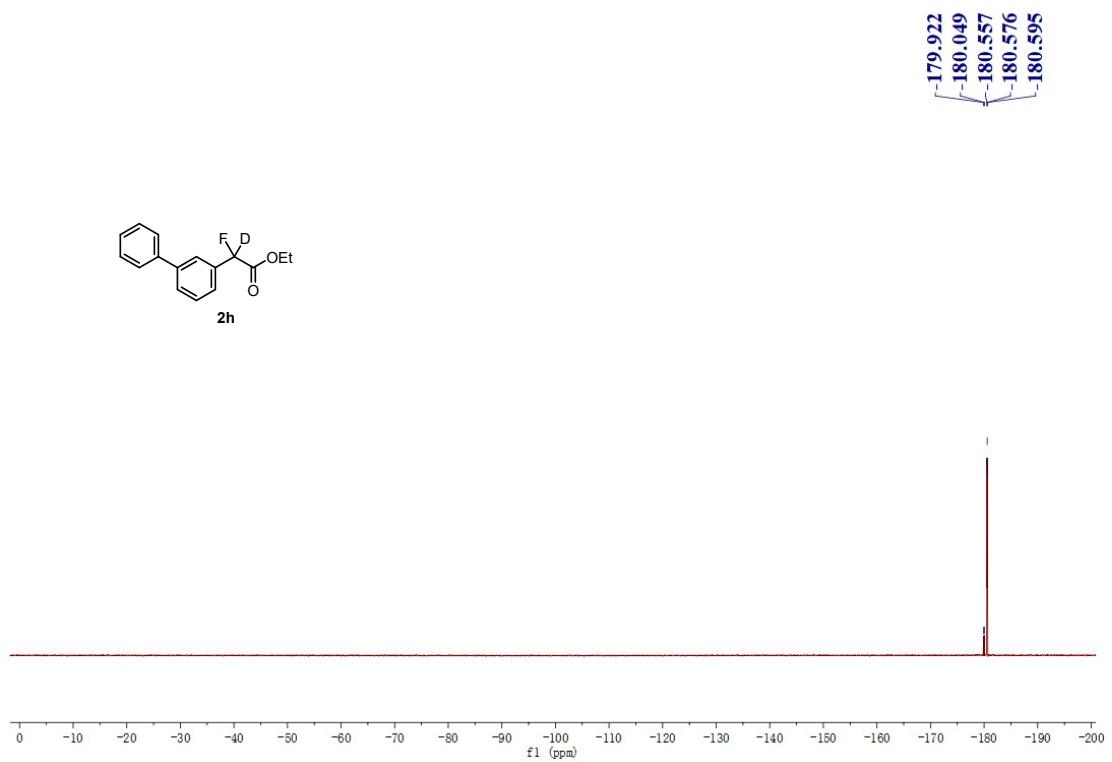

<sup>1</sup>H, <sup>13</sup>C NMR and <sup>19</sup>F spectra for compound 2i (Chloroform-d)

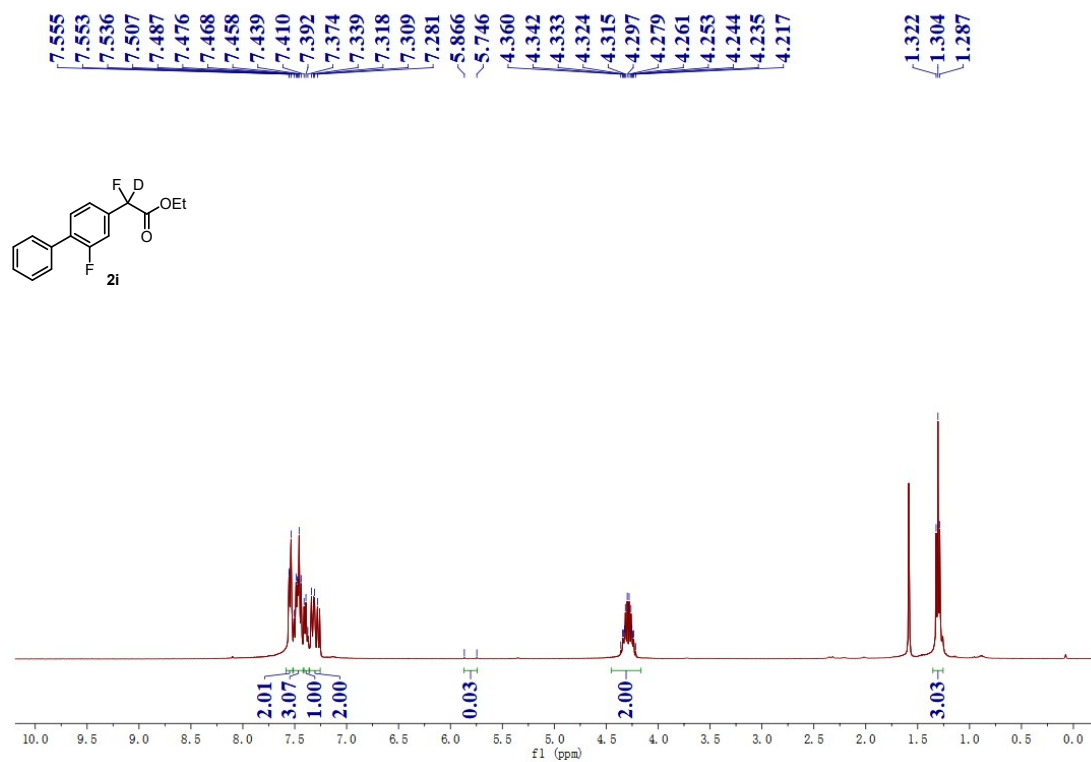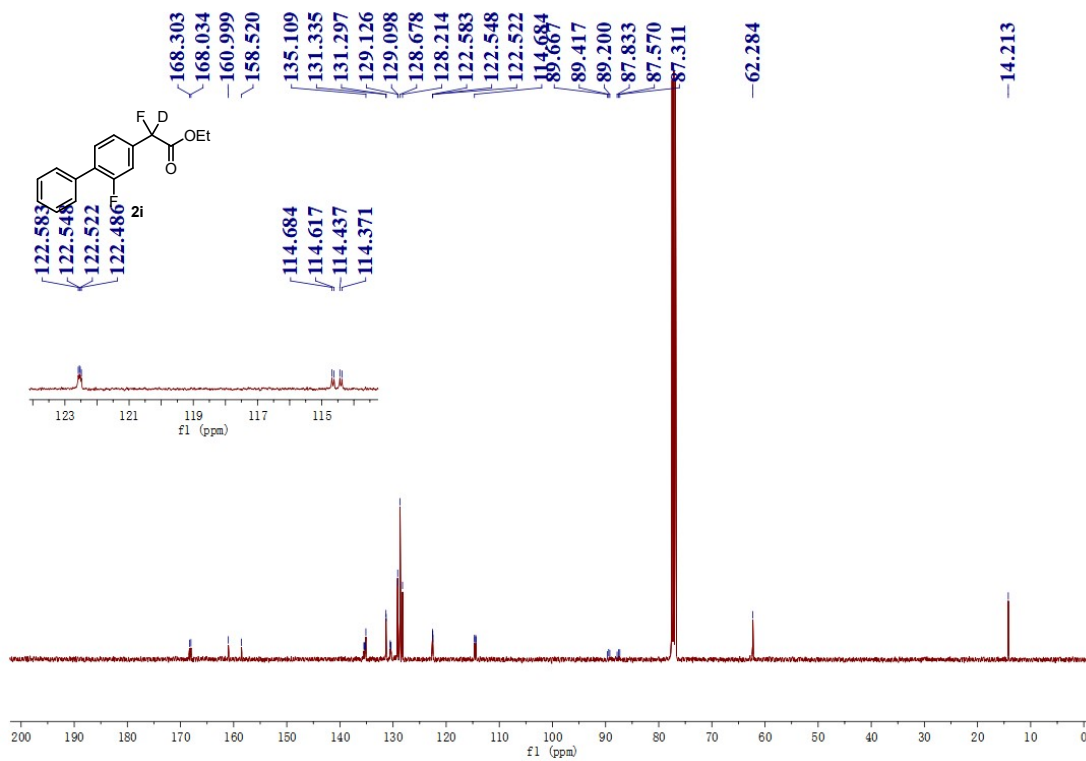



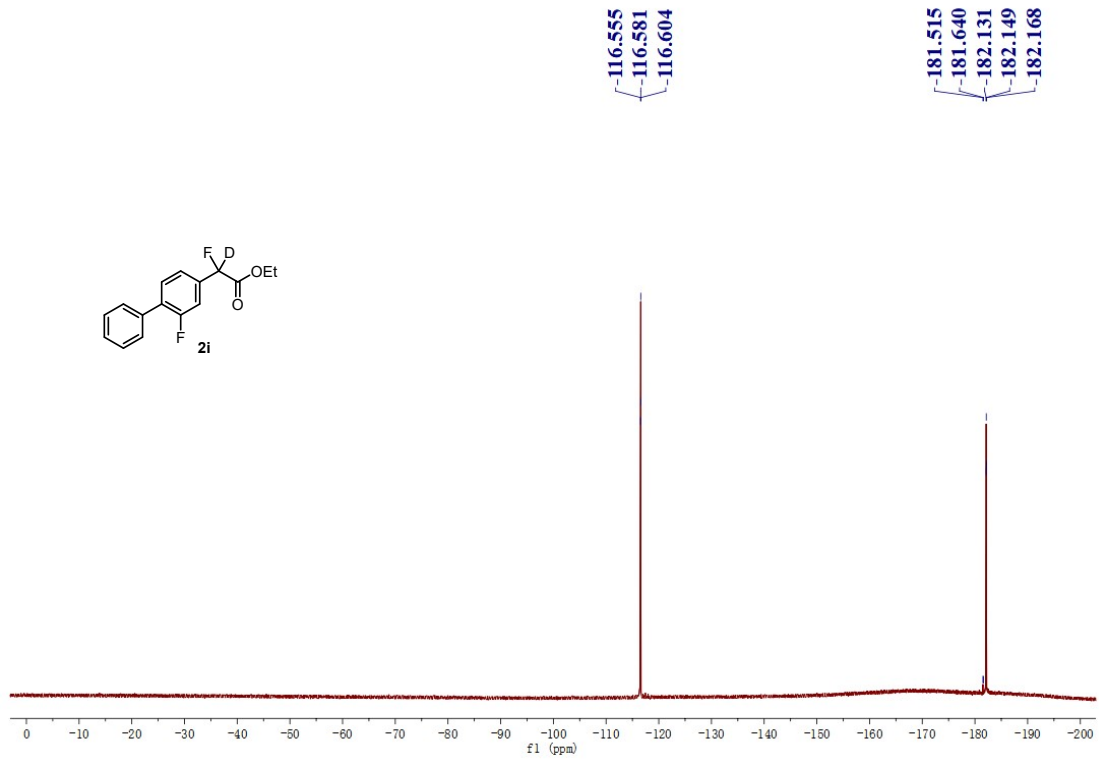

**<sup>1</sup>H, <sup>13</sup>C NMR and <sup>19</sup>F spectra for compound 2j (Chloroform-d)**

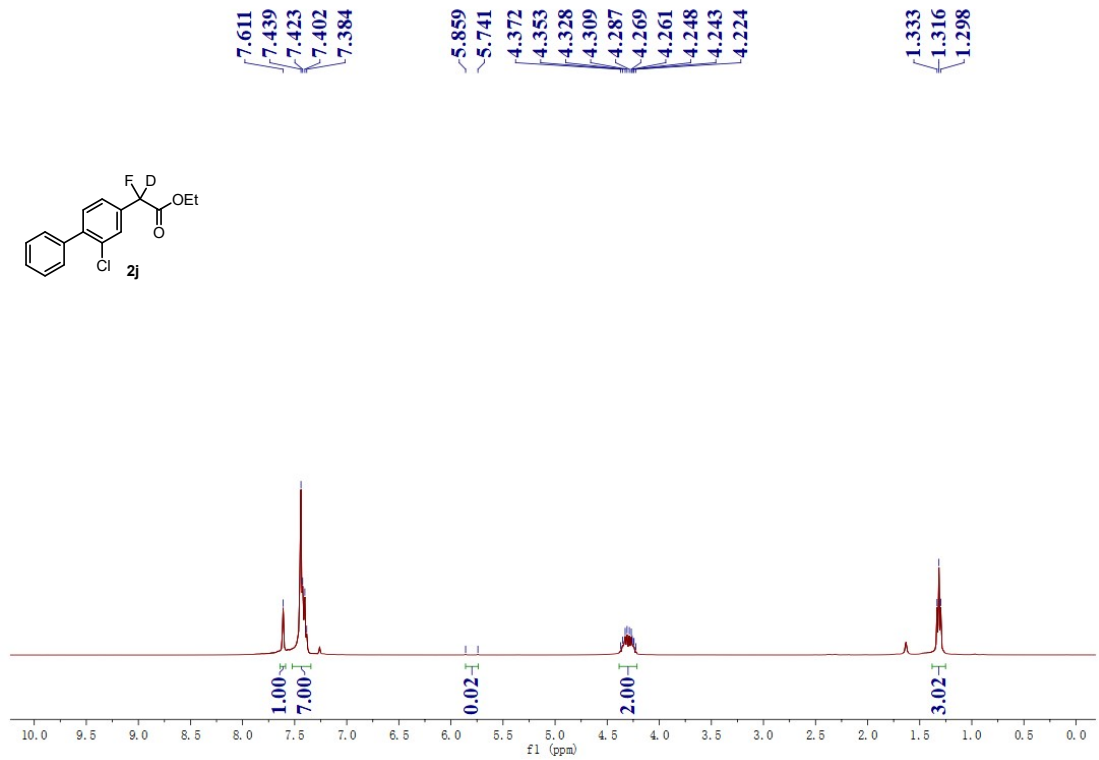

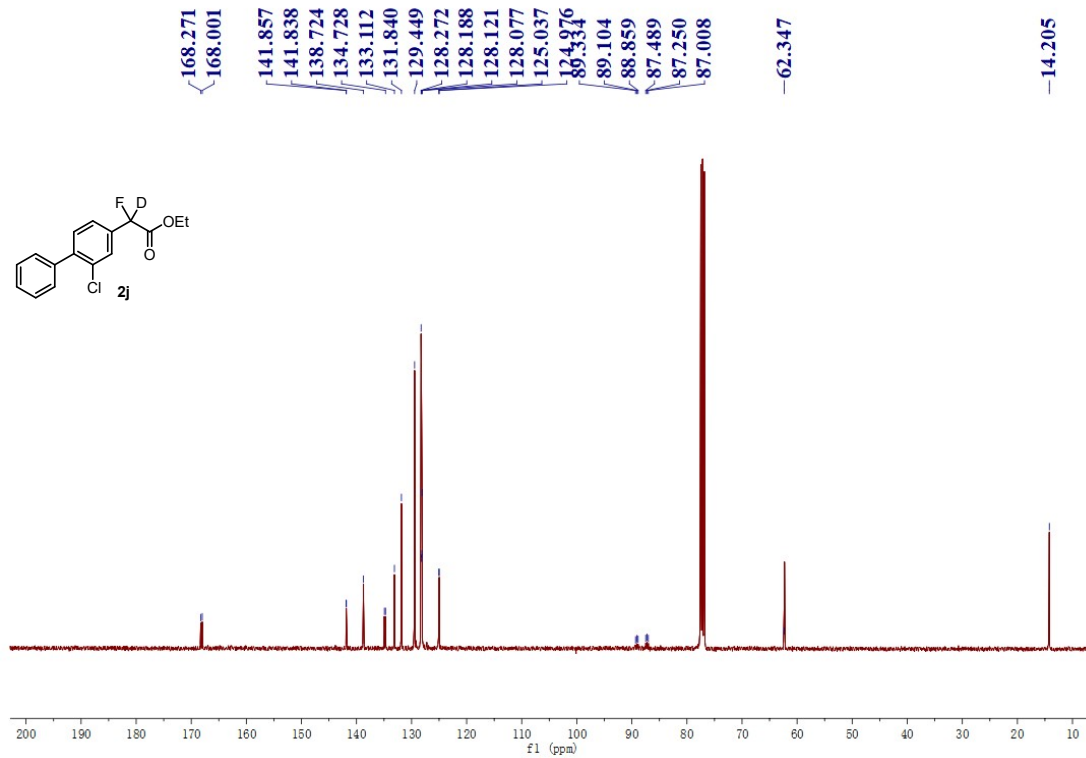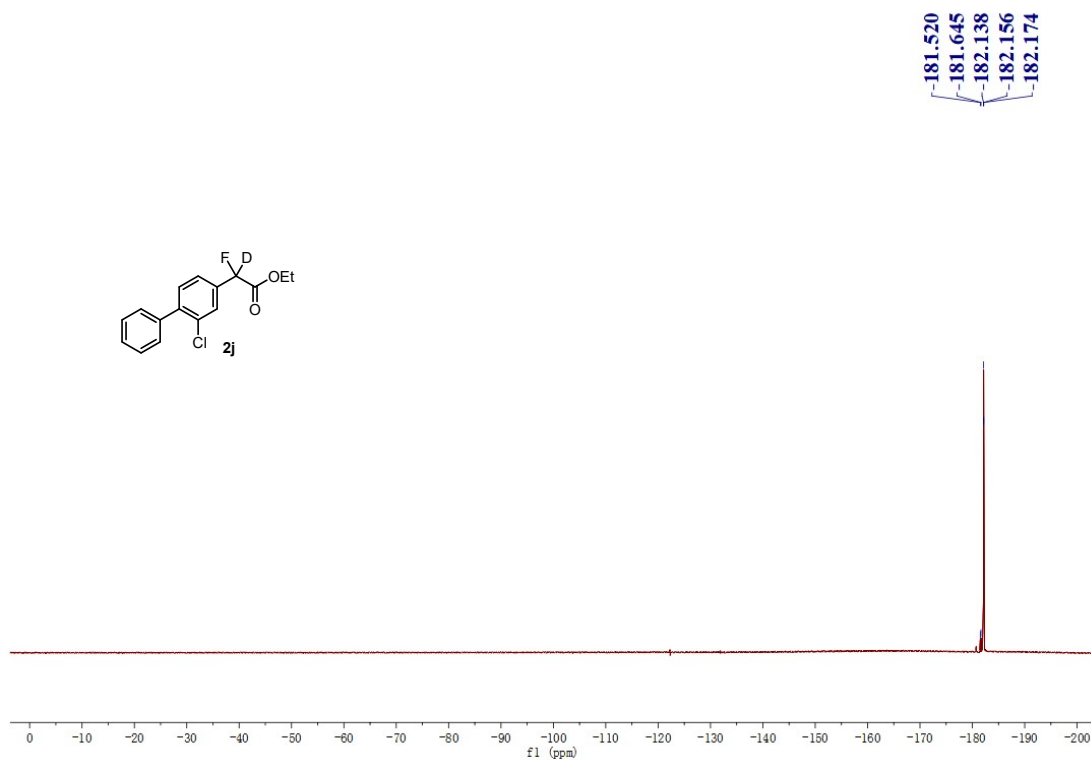

<sup>1</sup>H, <sup>13</sup>C NMR and <sup>19</sup>F spectra for compound 2k (Chloroform-d)

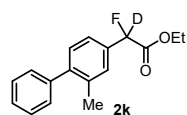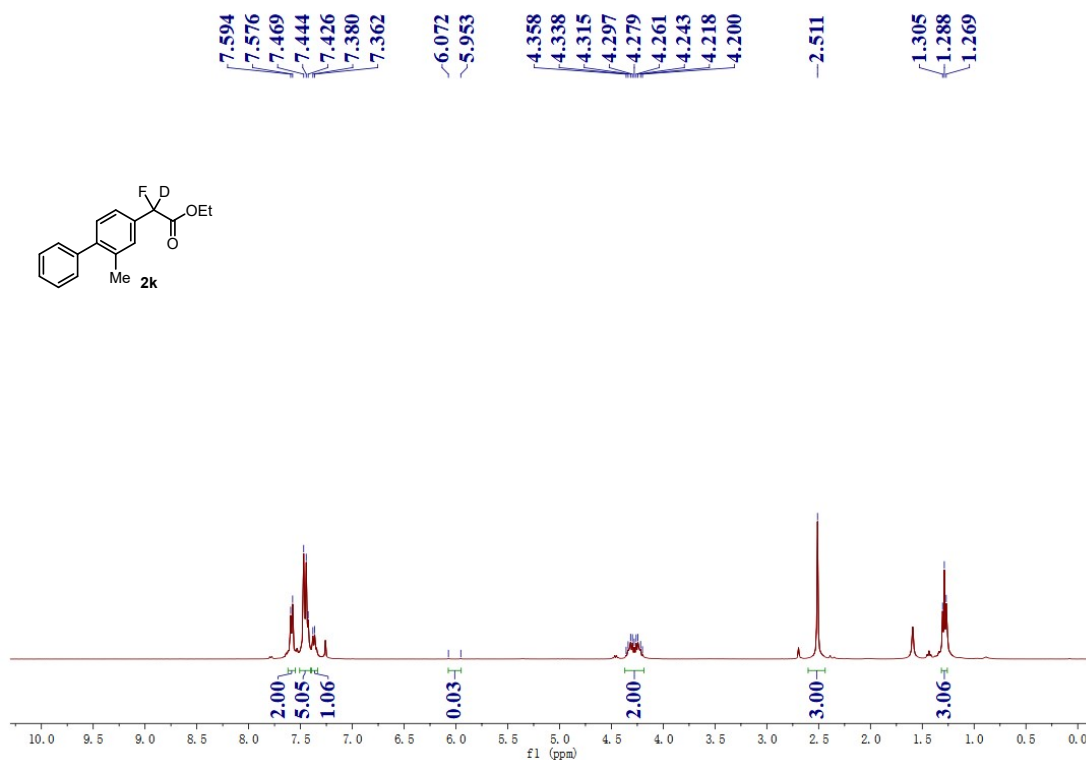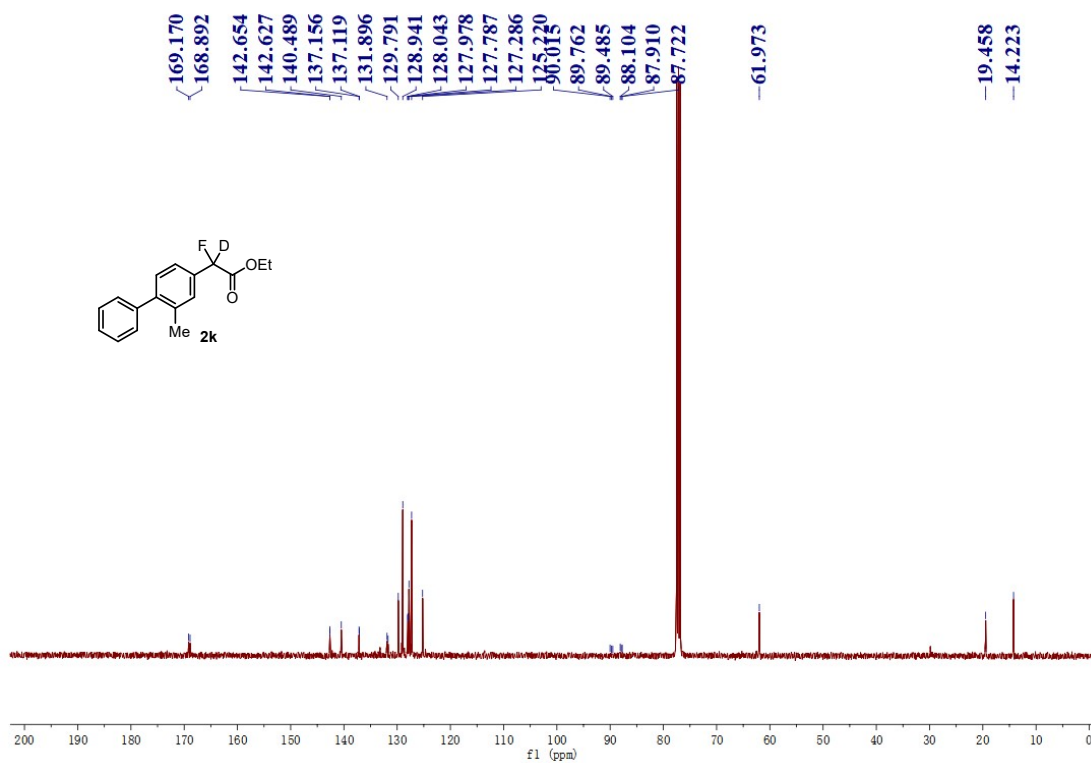

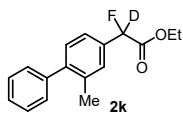

178.934  
179.063  
179.612  
179.629  
179.646

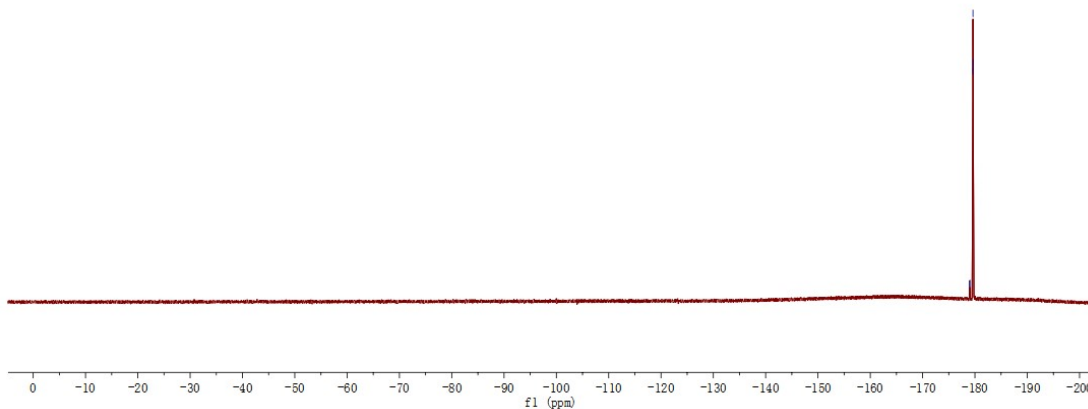

**<sup>1</sup>H, <sup>13</sup>C NMR and <sup>19</sup>F spectra for compound 2l (Chloroform-d)**

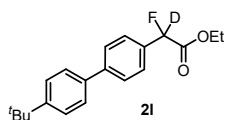

7.642  
7.624  
7.554  
7.536  
7.528  
7.519  
7.493  
7.475

5.878  
5.760  
4.353  
4.333  
4.314  
4.309  
4.291  
4.269  
4.264  
4.246  
4.237  
4.226  
4.202

1.372  
1.308  
1.293  
1.276

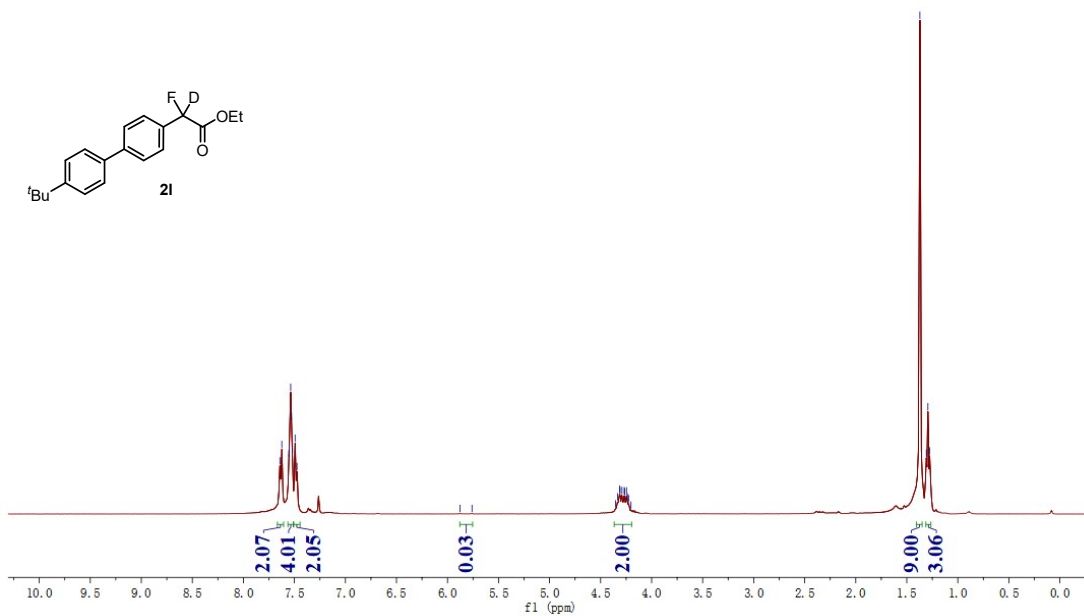

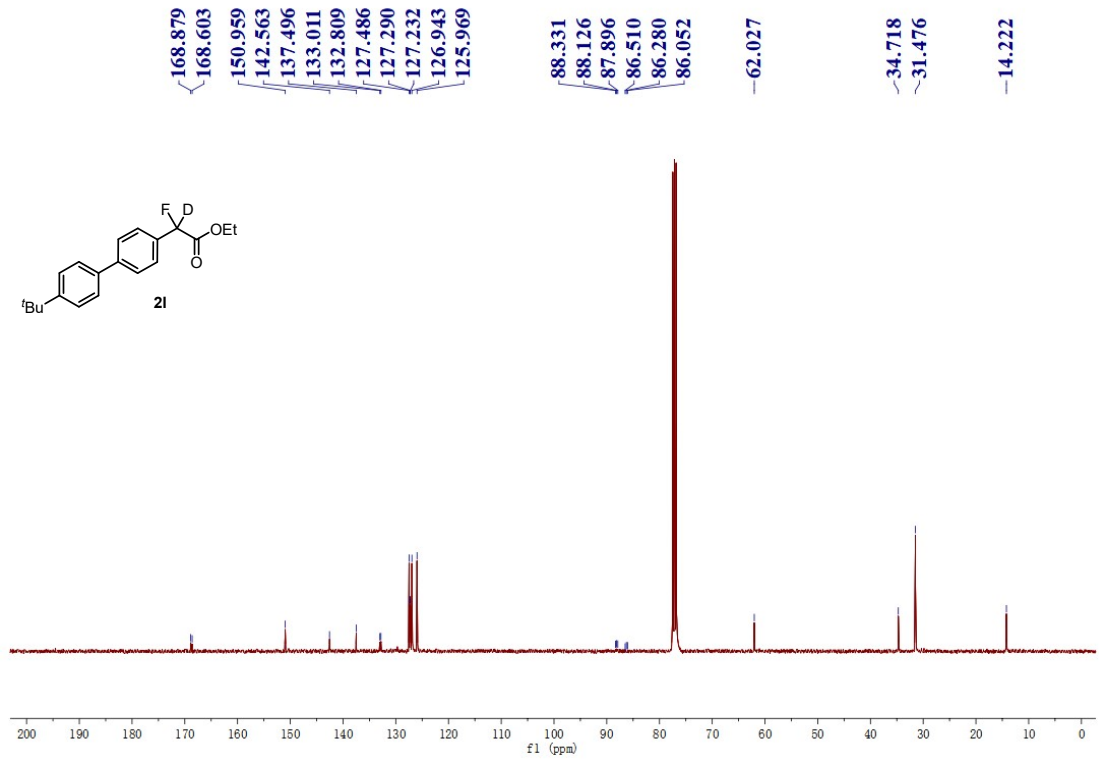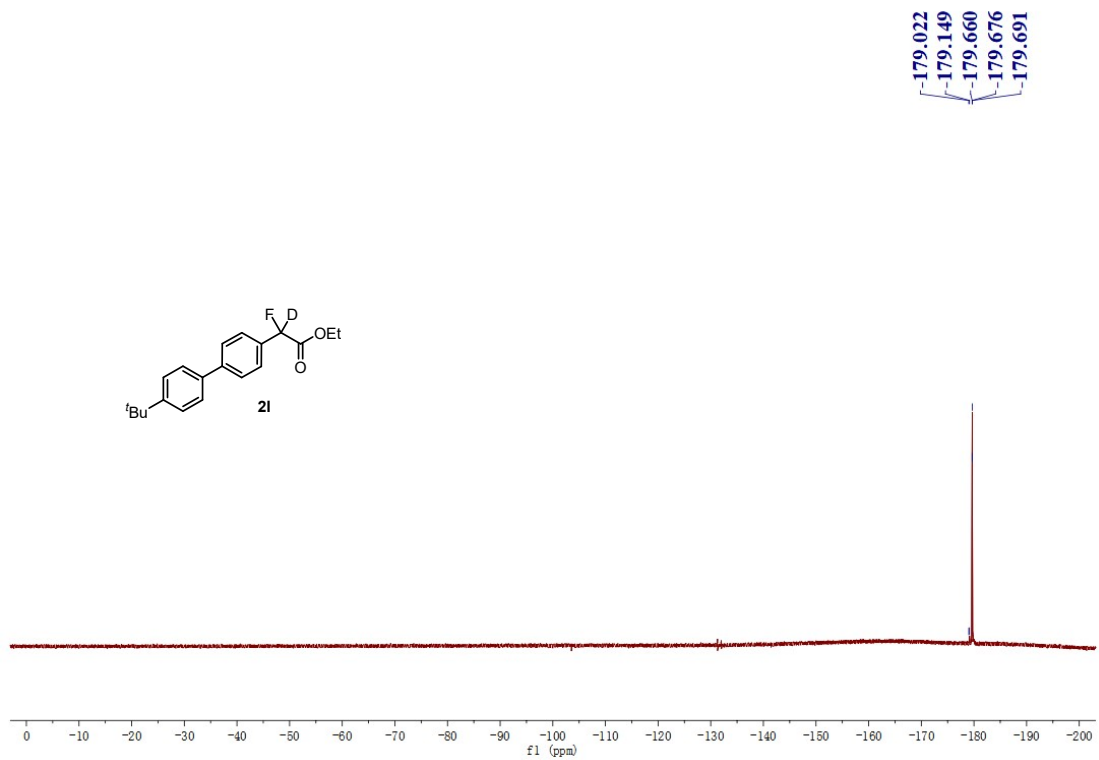

<sup>1</sup>H, <sup>13</sup>C NMR and <sup>19</sup>F spectra for compound 2m (Chloroform-d)

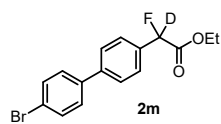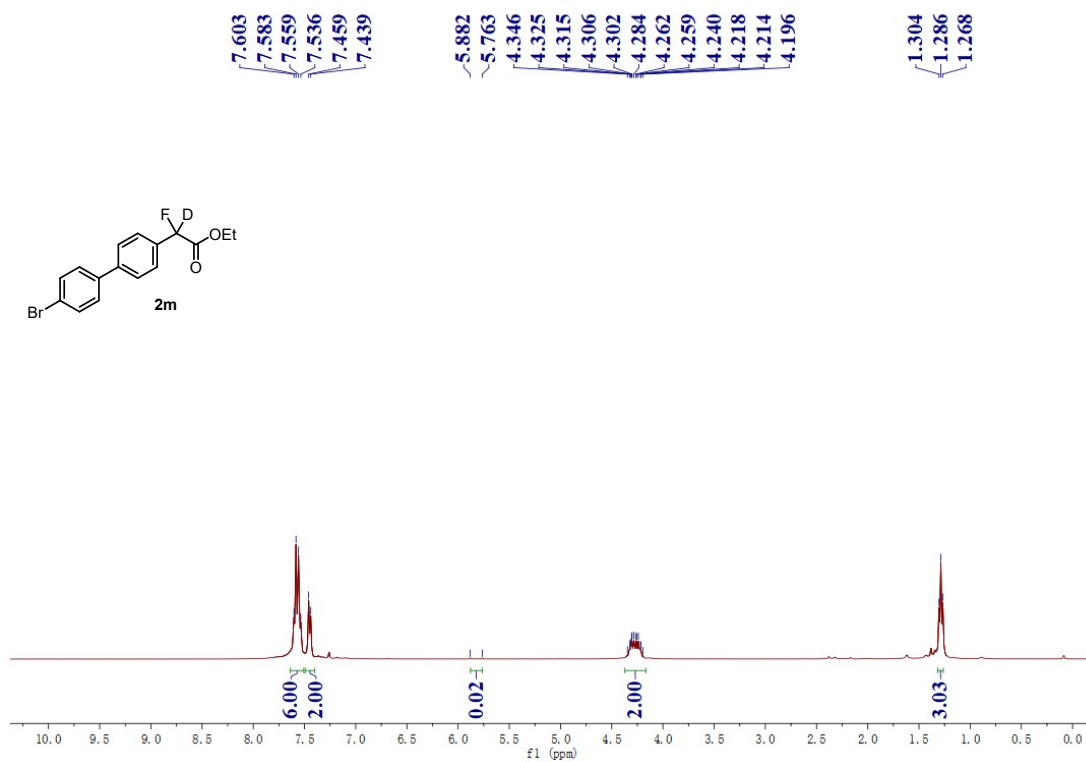

7.603, 7.583, 7.559, 7.536, 7.459, 7.439, 5.882, 5.763, 4.346, 4.325, 4.315, 4.306, 4.302, 4.284, 4.262, 4.259, 4.240, 4.218, 4.214, 4.196, 1.304, 1.286, 1.268

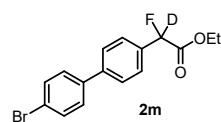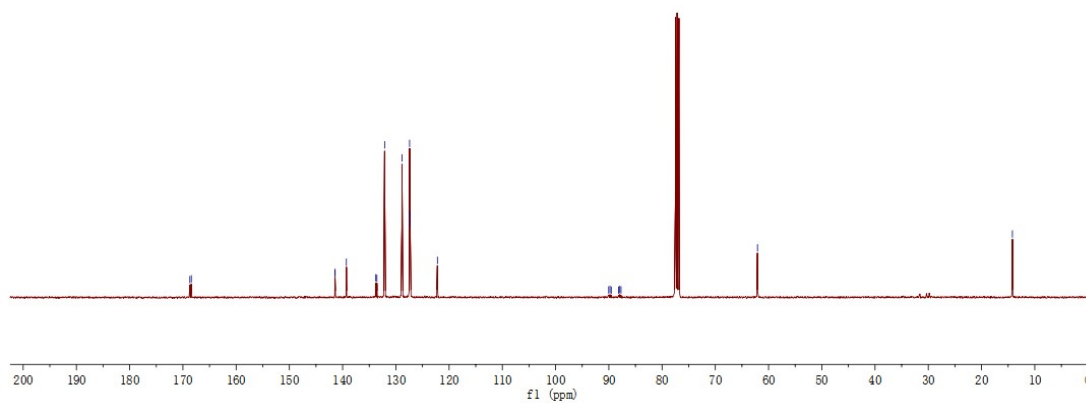

168.692, 168.419, 141.421, 141.401, 139.292, 133.768, 133.563, 132.113, 128.853, 127.422, 127.374, 127.315, 122.196, 90.026, 89.786, 89.551, 88.164, 87.946, 87.711, 62.076, 14.197

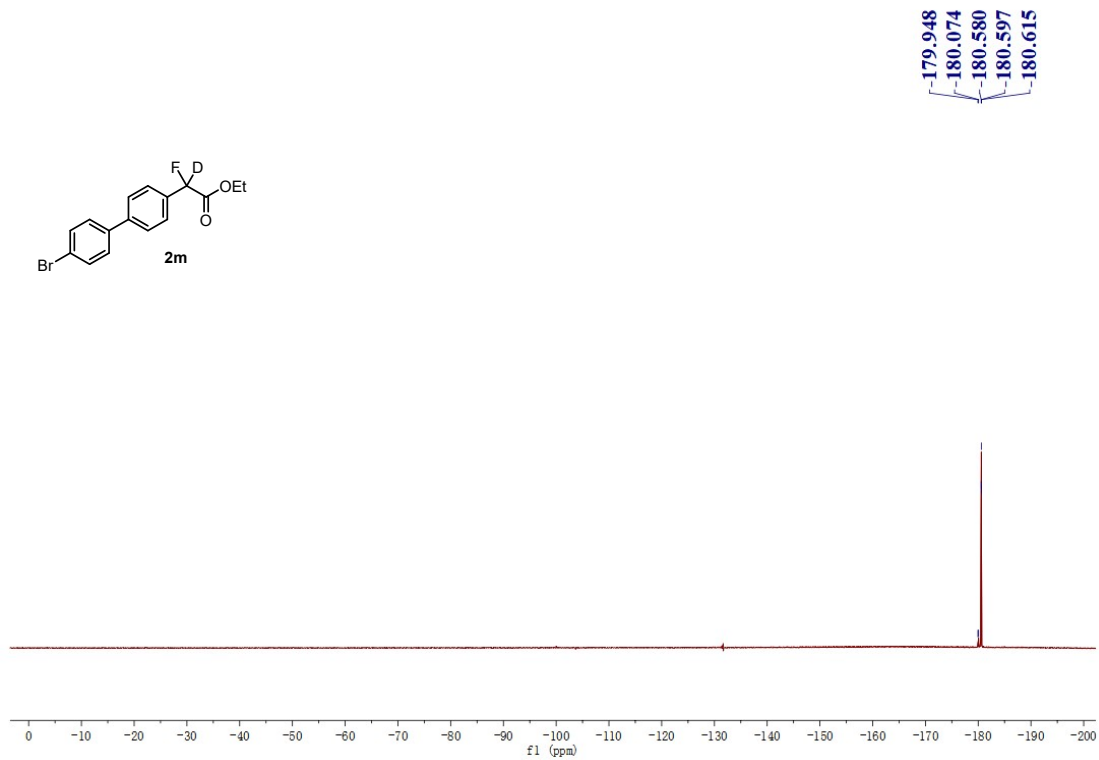

**$^1\text{H}$ ,  $^{13}\text{C}$  NMR and  $^{19}\text{F}$  spectra for compound 2n (Chloroform-d)**

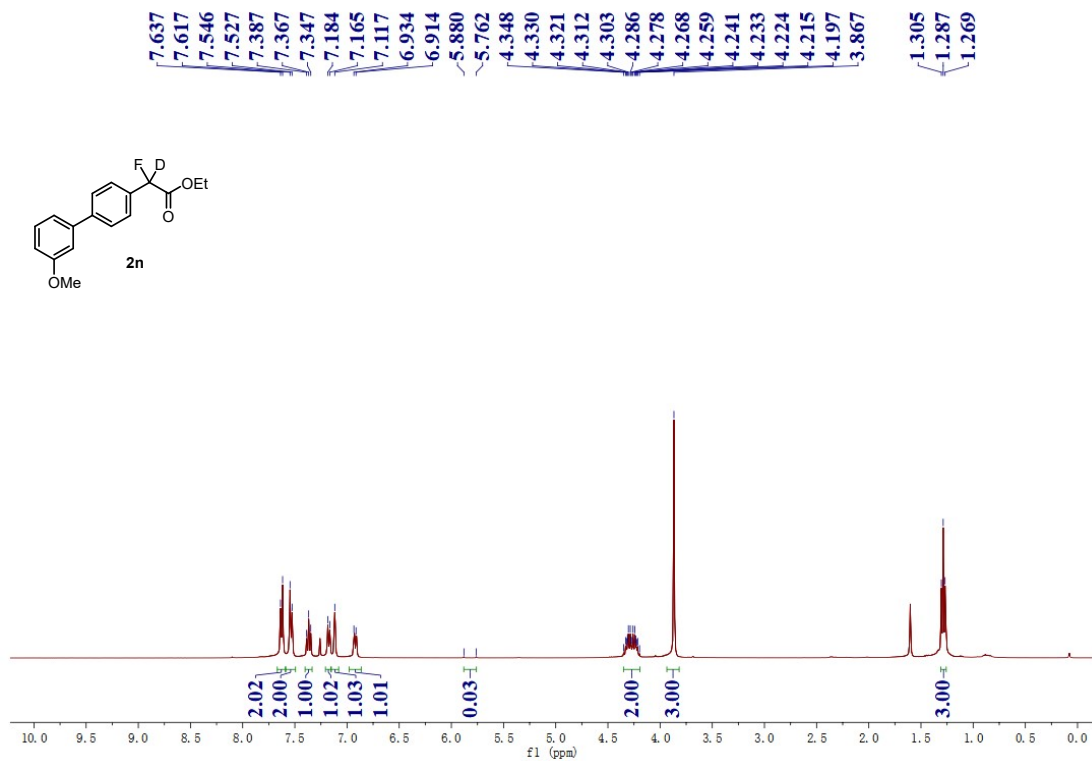

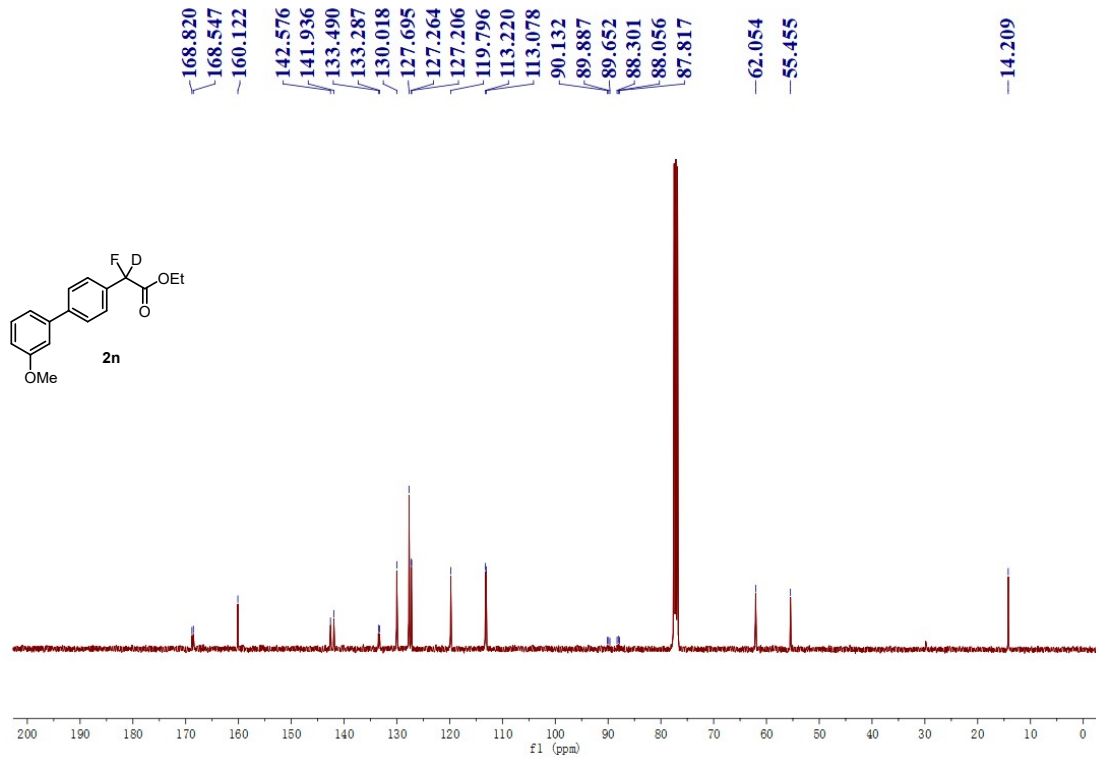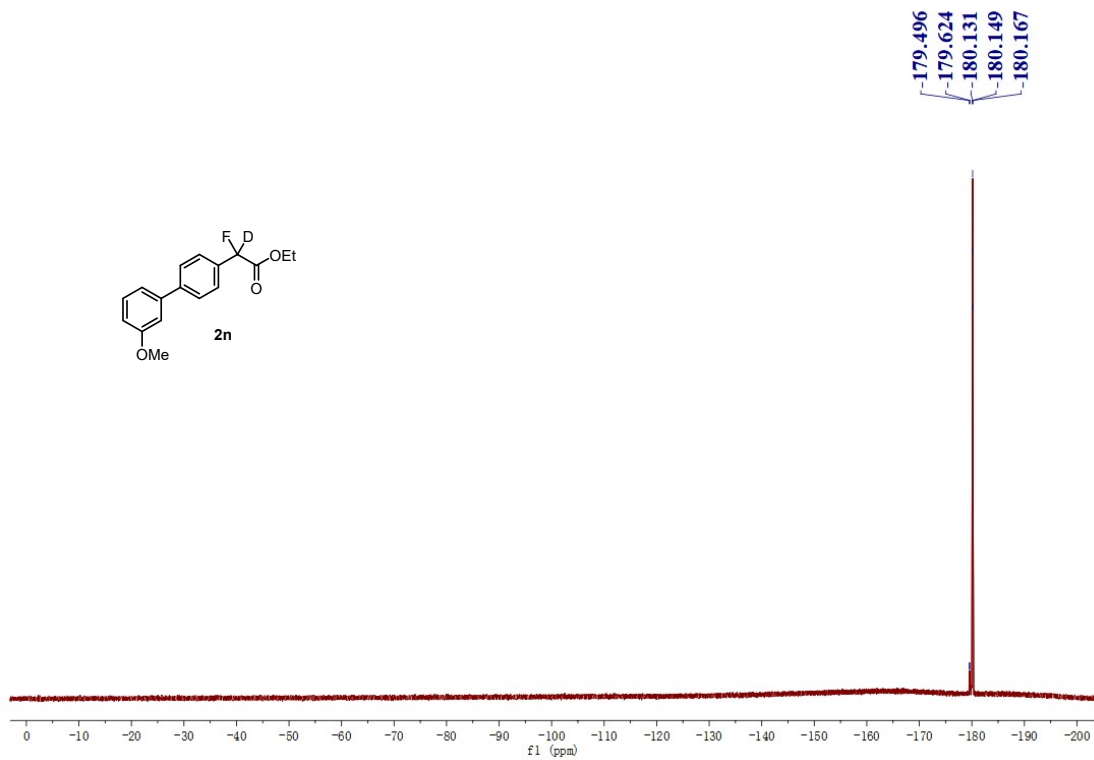



<sup>1</sup>H, <sup>13</sup>C NMR and <sup>19</sup>F spectra for compound 2o (Chloroform-d)

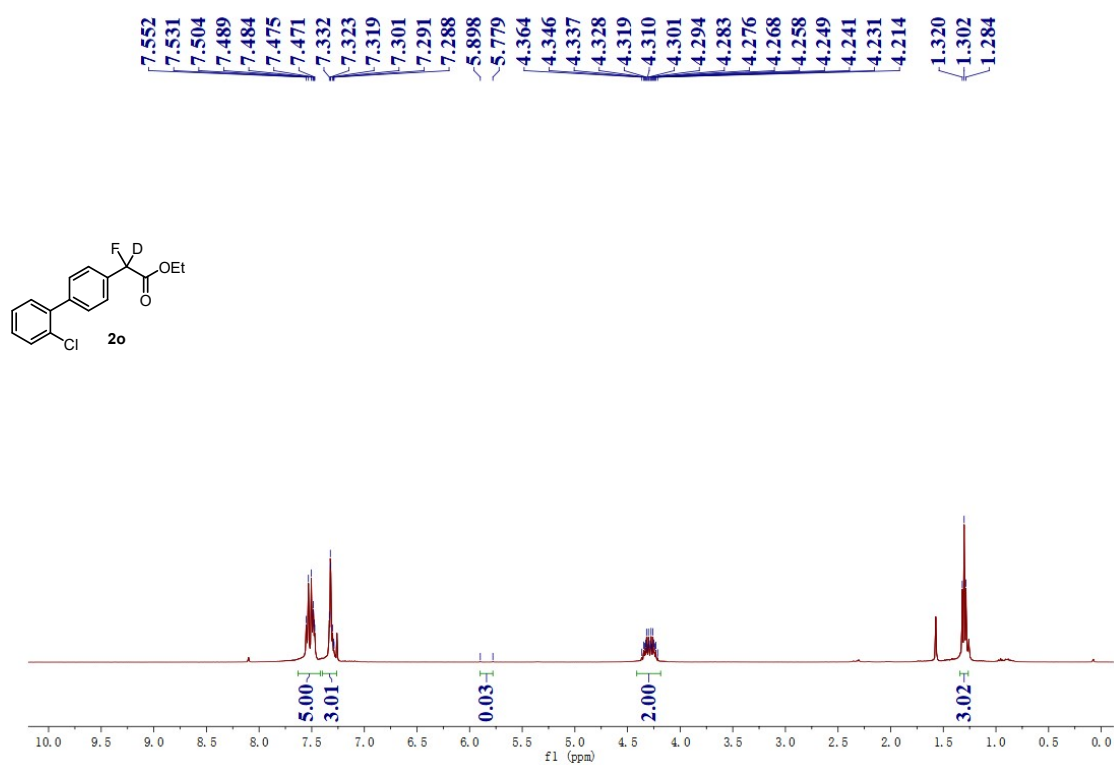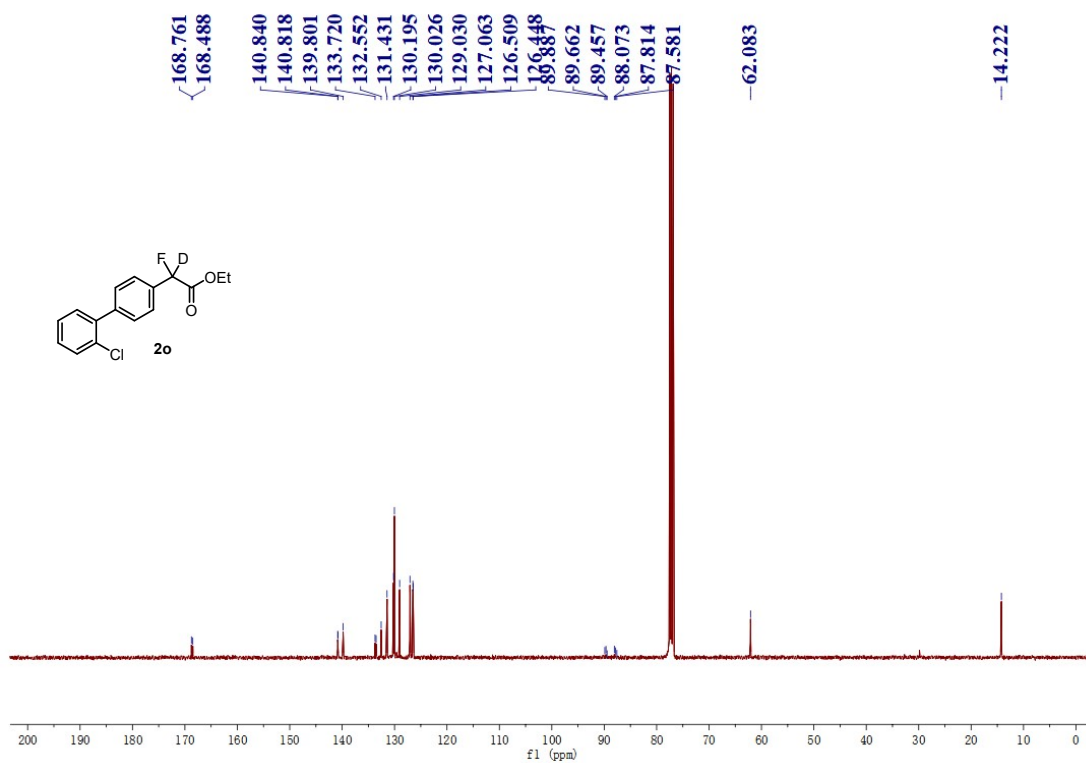

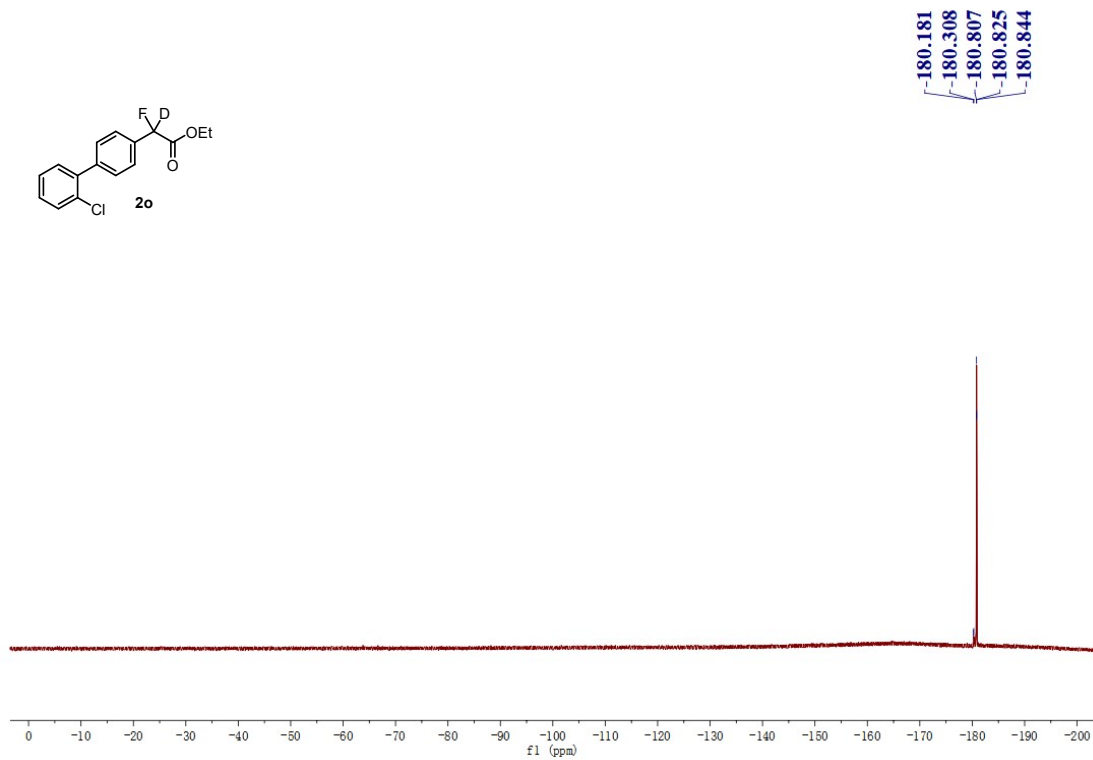

**<sup>1</sup>H, <sup>13</sup>C NMR and <sup>19</sup>F spectra for compound 2p (Chloroform-d)**

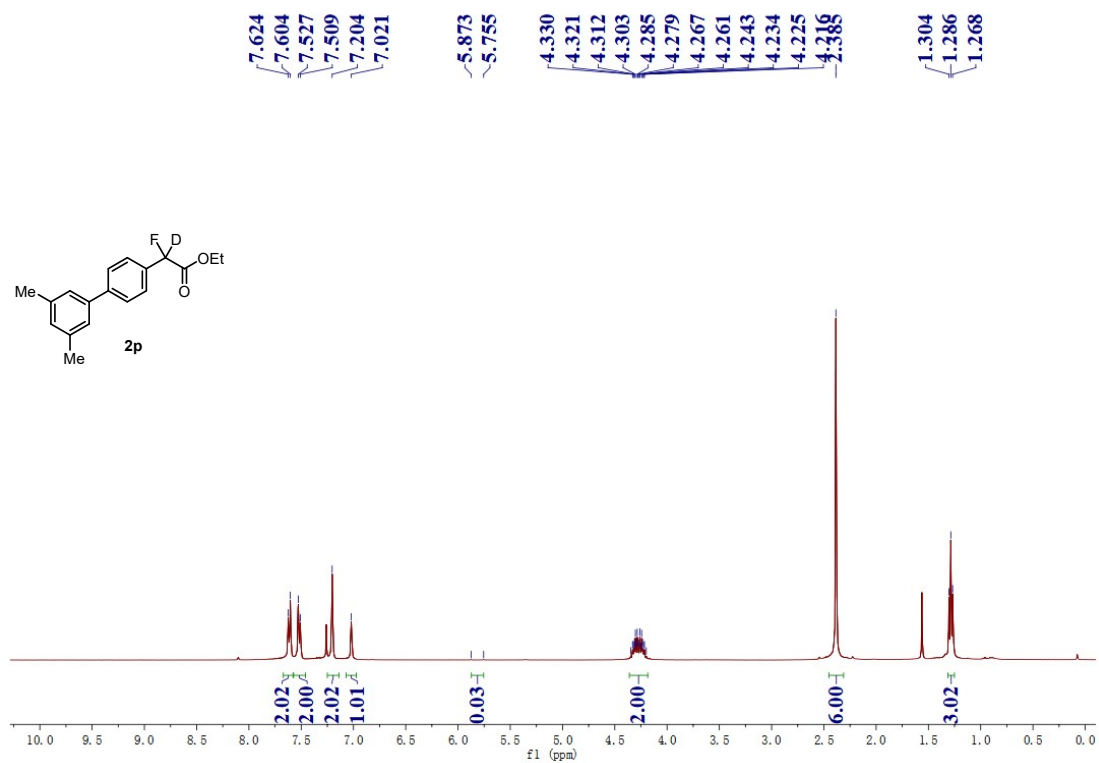

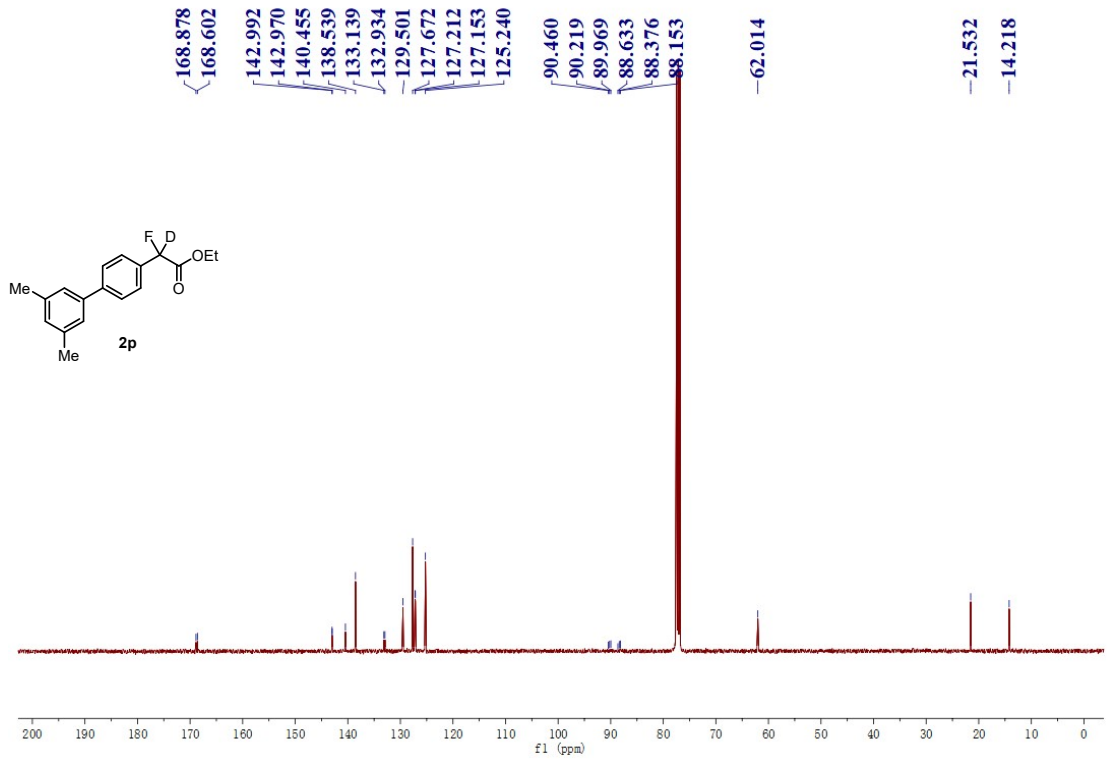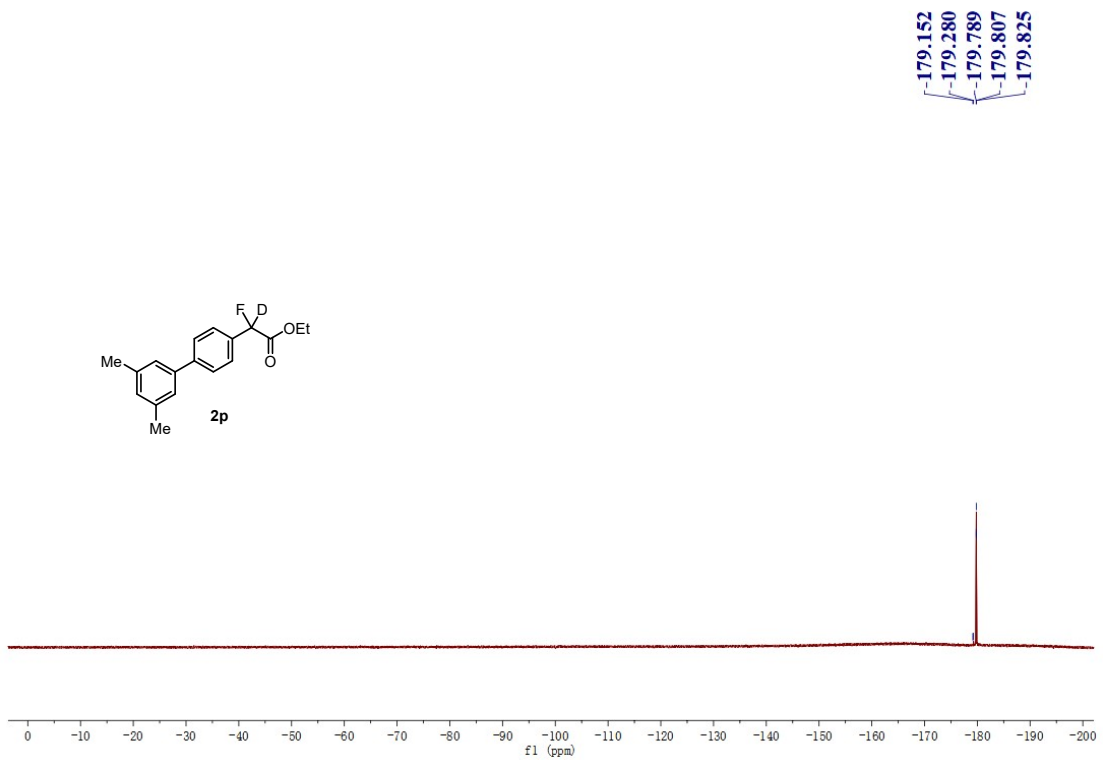

<sup>1</sup>H, <sup>13</sup>C NMR and <sup>19</sup>F spectra for compound 2q (Chloroform-d)

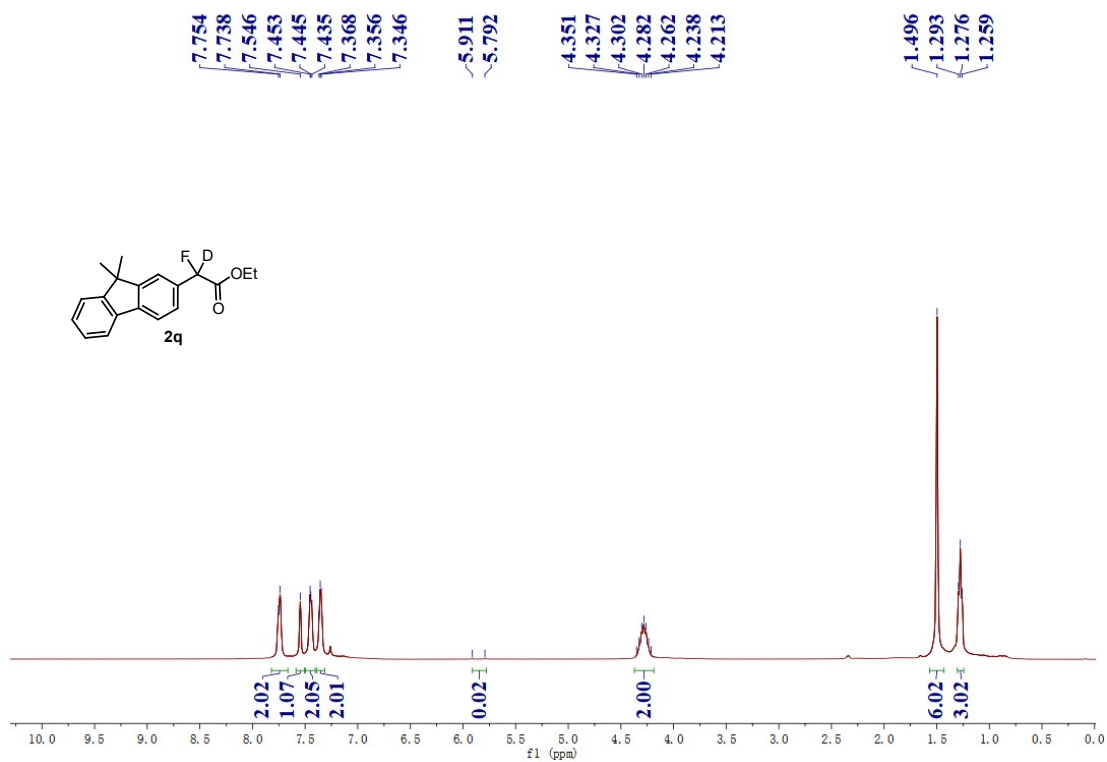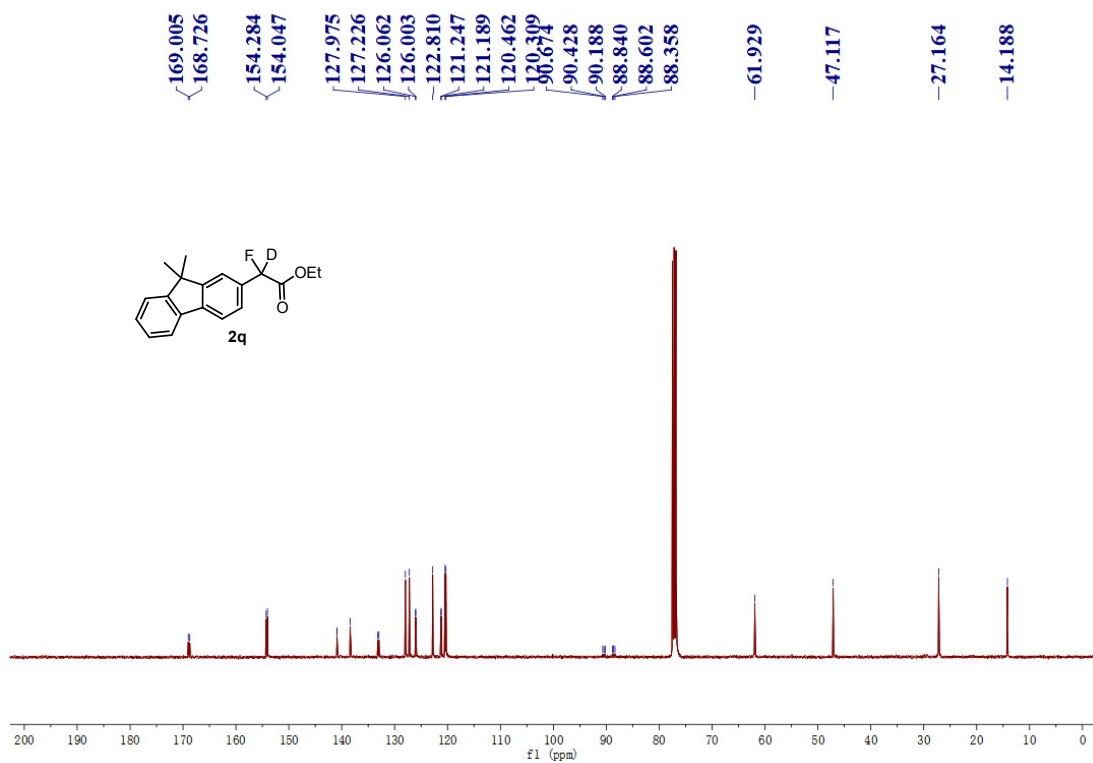

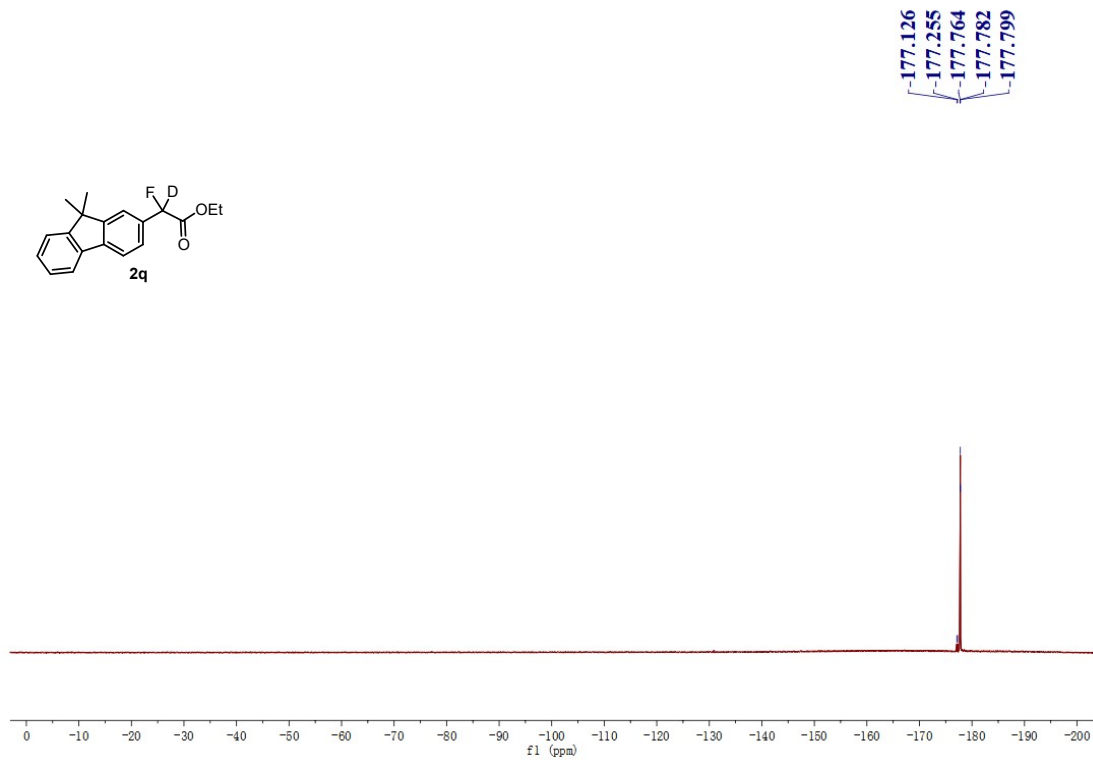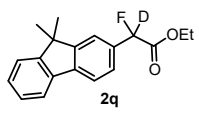

**<sup>1</sup>H, <sup>13</sup>C NMR and <sup>19</sup>F spectra for compound 2r (Chloroform-d)**

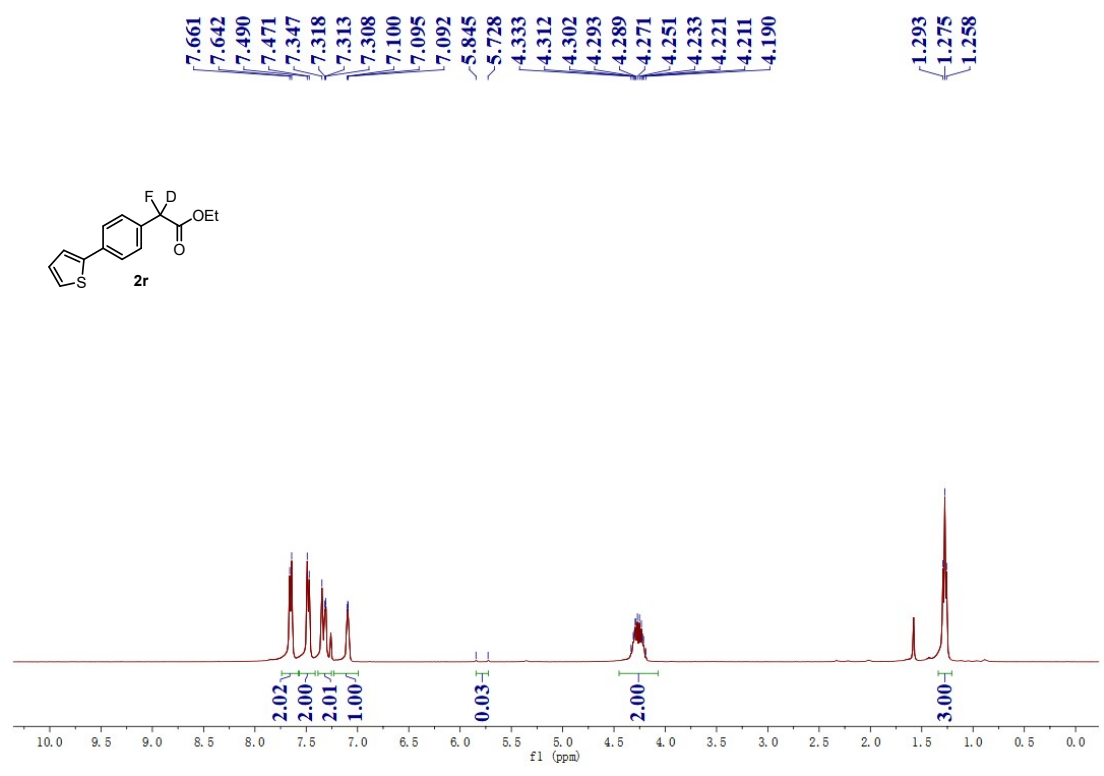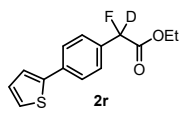

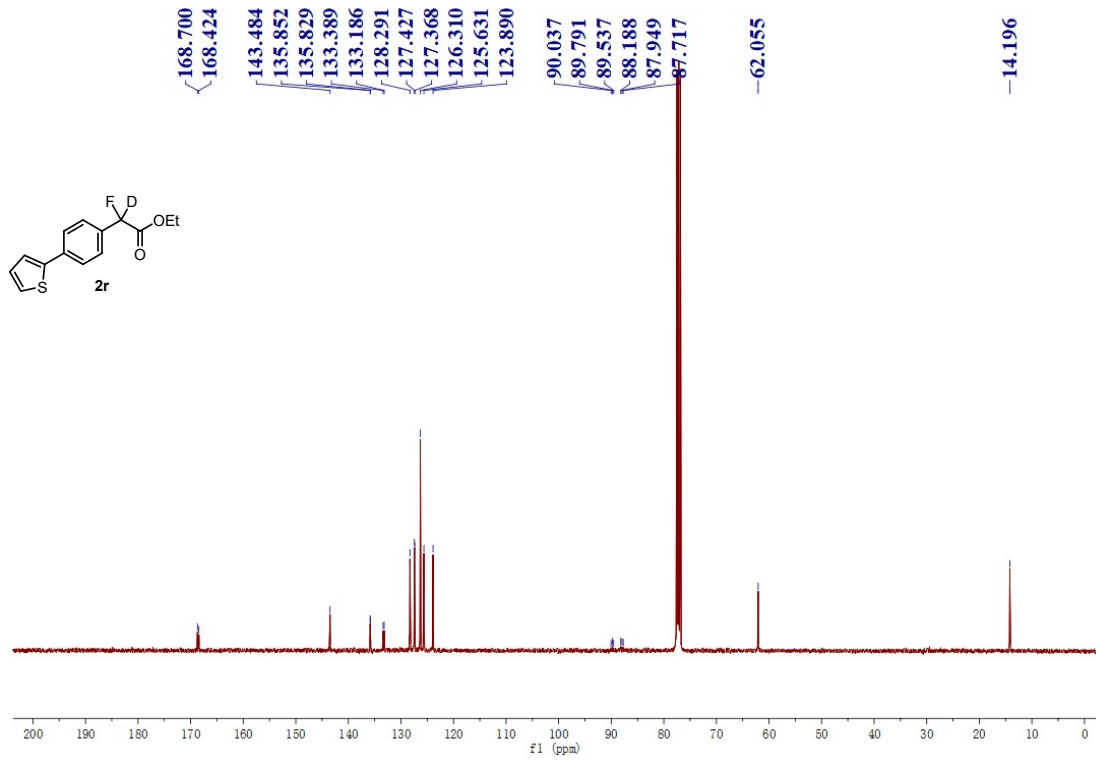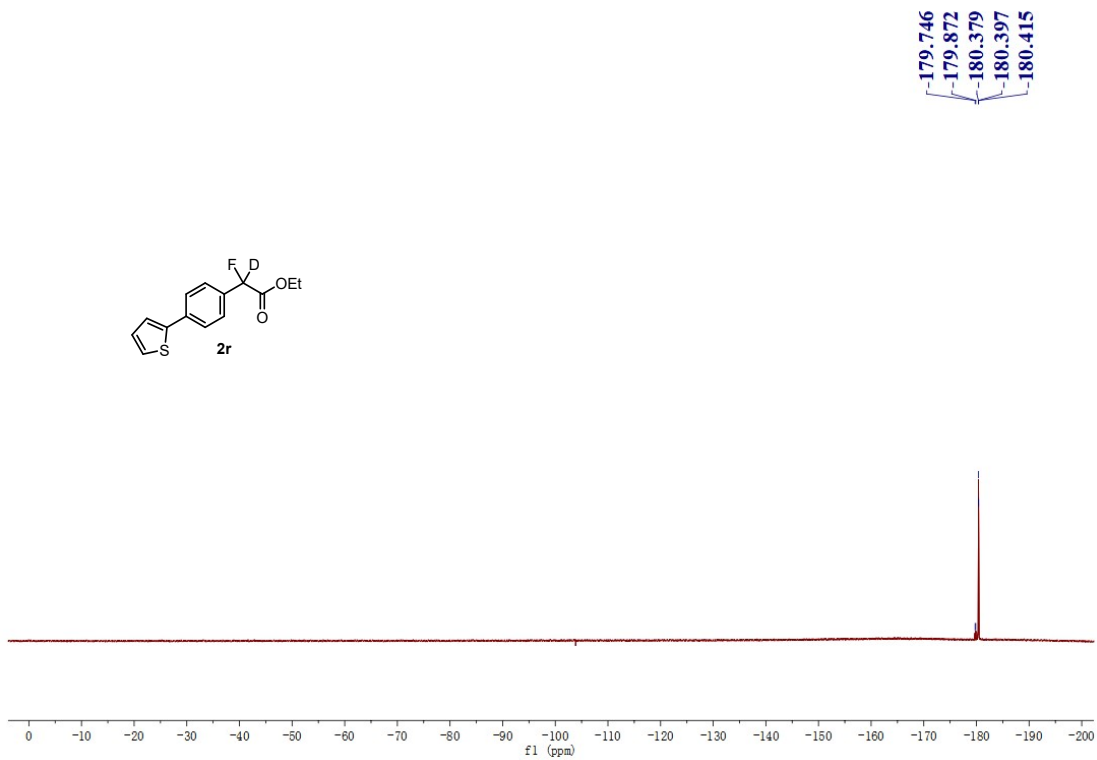

<sup>1</sup>H, <sup>13</sup>C NMR and <sup>19</sup>F spectra for compound 2s (Chloroform-d)

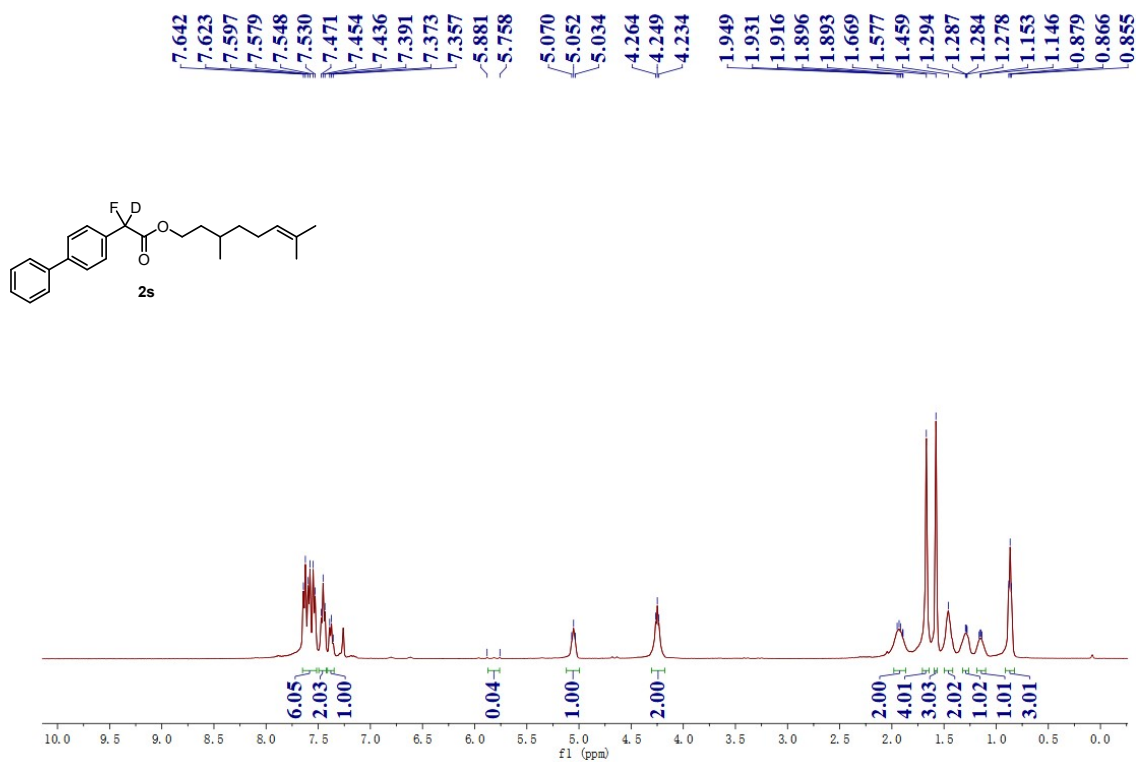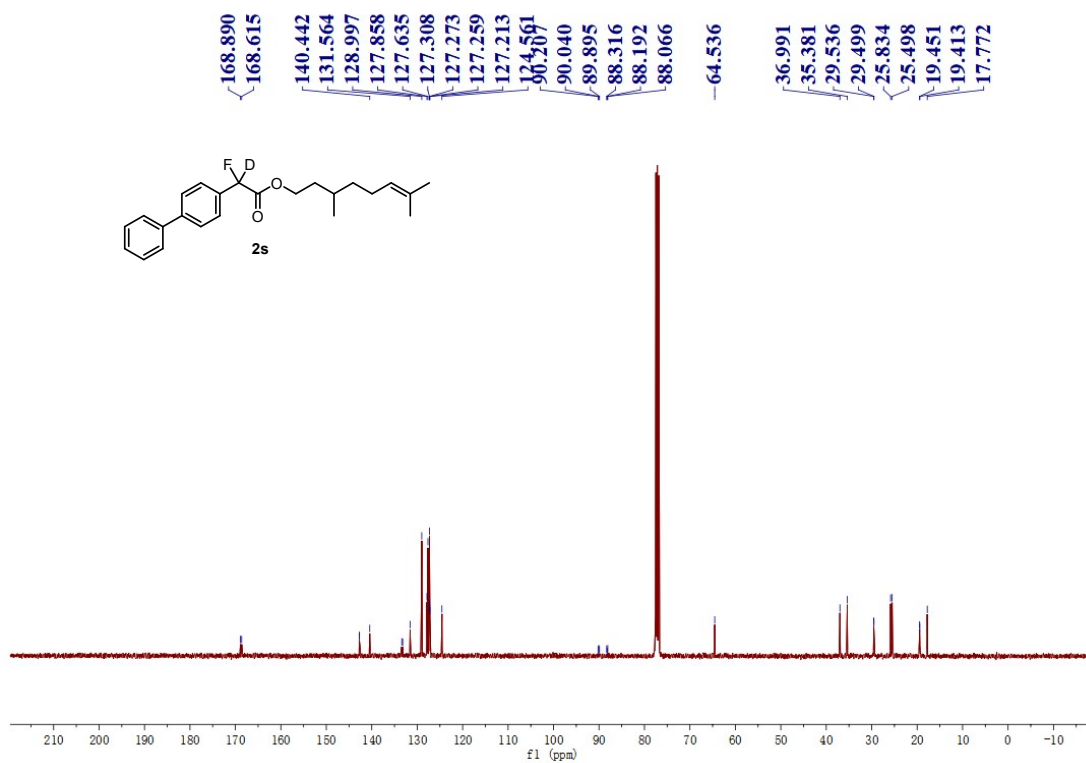

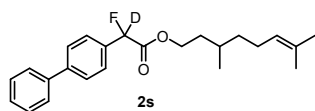

179.615  
179.742  
179.871  
180.257  
180.272  
180.287  
180.387  
180.401  
180.415

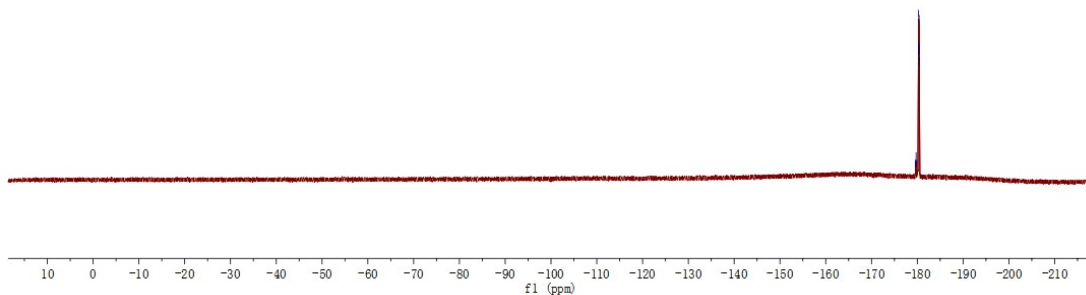

**<sup>1</sup>H, <sup>13</sup>C NMR and <sup>19</sup>F spectra for compound 2t (Chloroform-d)**

7.656  
7.638  
7.621  
7.603  
7.584  
7.555  
7.536  
7.479  
7.462  
7.445  
7.397  
7.380  
7.364  
4.836  
4.761  
2.044  
1.907  
1.879  
1.694  
1.666  
1.643  
1.610  
1.478  
1.447  
1.419  
1.339  
1.317  
1.077  
1.047  
1.016  
-0.983  
-0.973  
-0.915  
-0.903  
-0.880  
-0.869  
-0.843  
-0.775  
-0.697  
-0.683  
-0.540  
-0.527

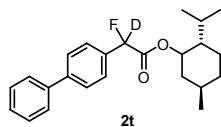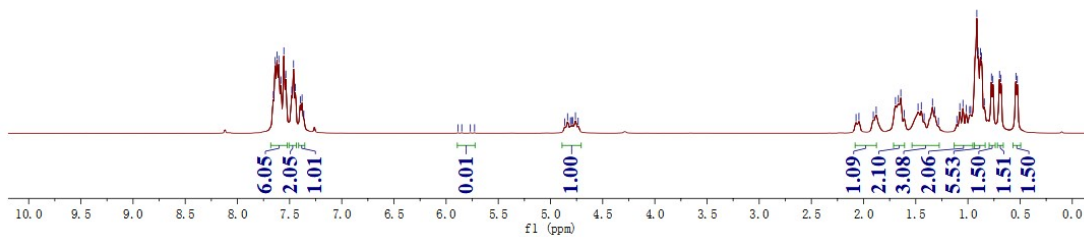



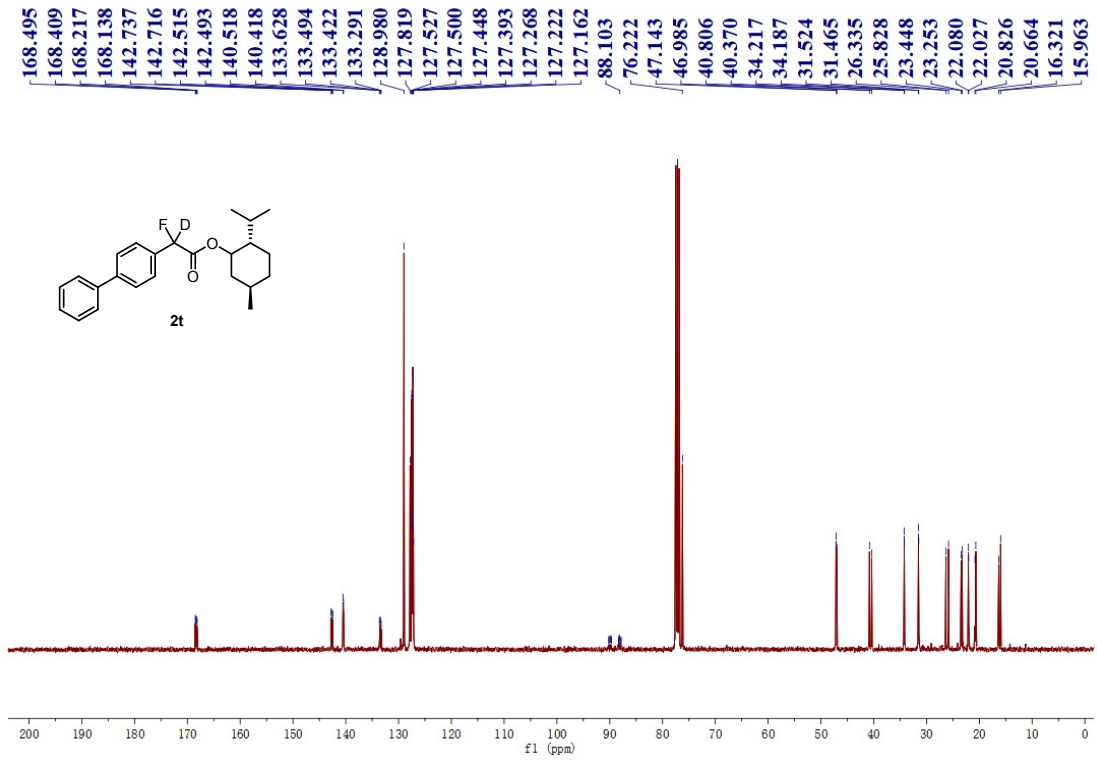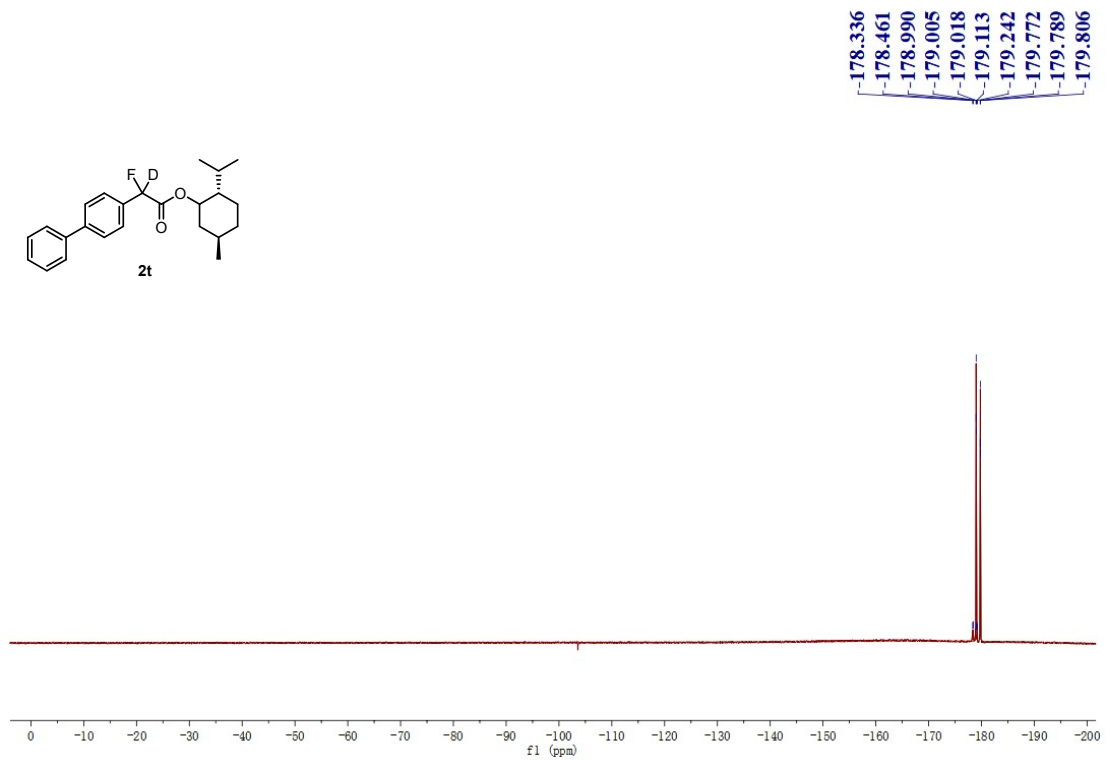

<sup>1</sup>H, <sup>13</sup>C NMR and <sup>19</sup>F spectra for compound 2u (Chloroform-d)

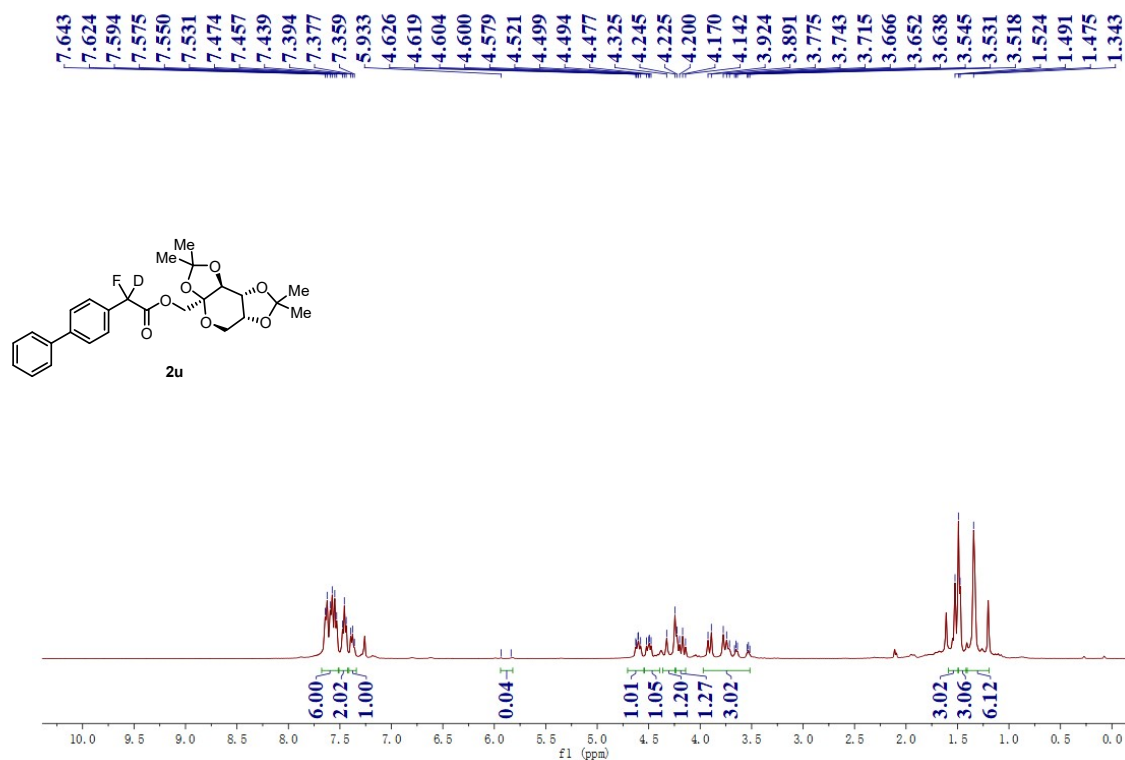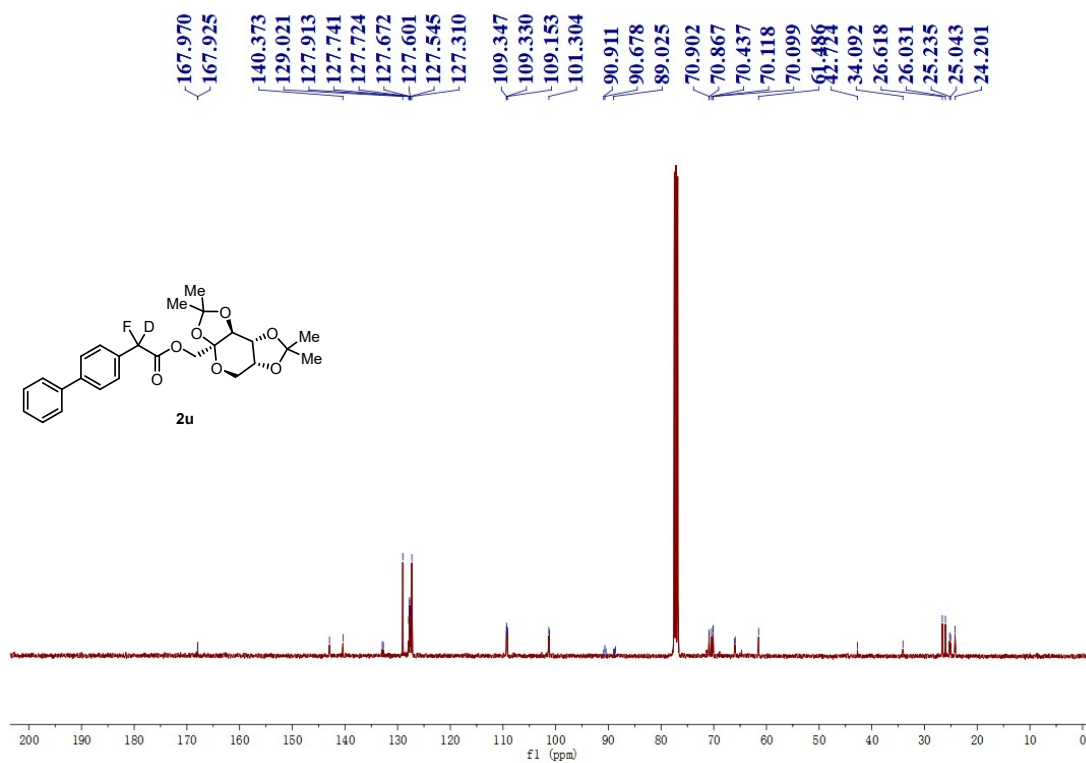

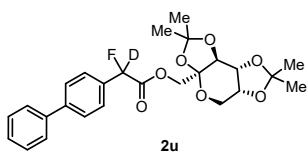

177.763  
177.892  
178.030  
178.152  
178.420  
178.435  
178.451  
178.671  
178.689  
178.704

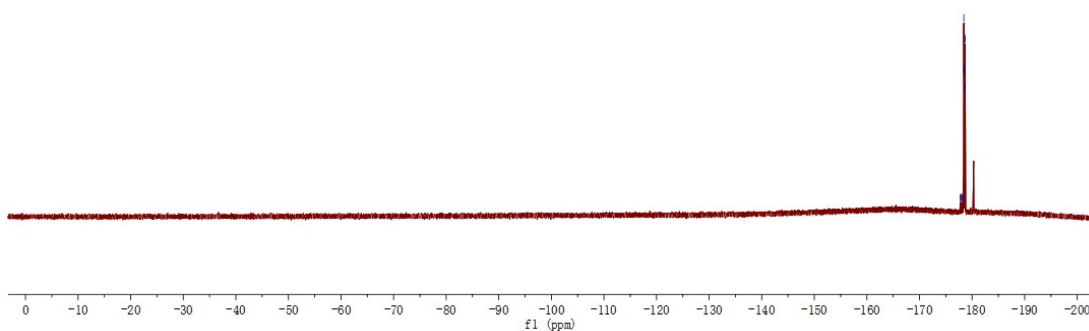

**$^1\text{H}$ ,  $^{13}\text{C}$  NMR and  $^{19}\text{F}$  spectra for compound 2v (Chloroform-d)**

7.648  
7.630  
7.610  
7.592  
7.555  
7.537  
7.472  
7.455  
7.438  
7.390  
7.372  
2.397  
2.379  
2.268  
2.031  
1.993  
1.940  
1.901  
1.858  
1.822  
1.592  
1.556  
1.542  
1.526  
1.489  
1.472  
1.346  
1.338  
1.297  
1.270  
1.249  
1.123  
1.083  
1.056  
1.024  
1.009  
0.981  
0.925  
0.911  
0.877  
0.864  
0.676  
0.670

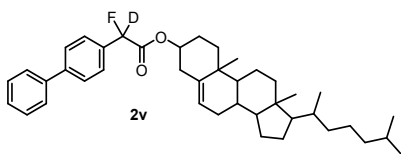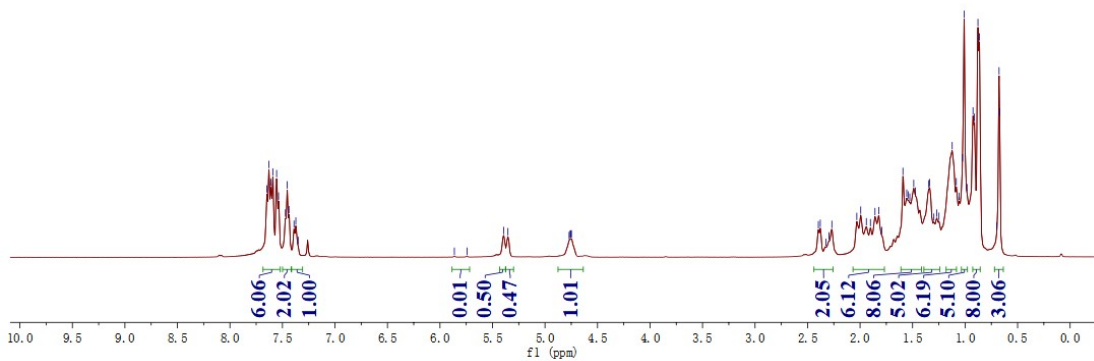

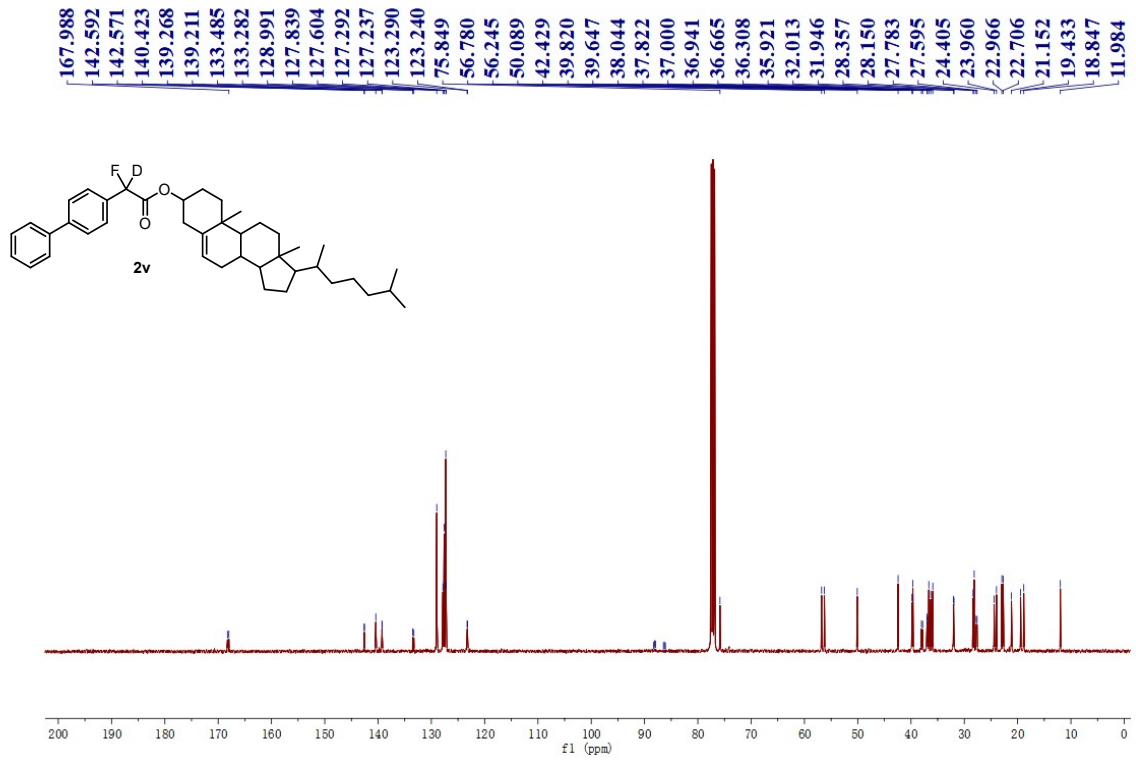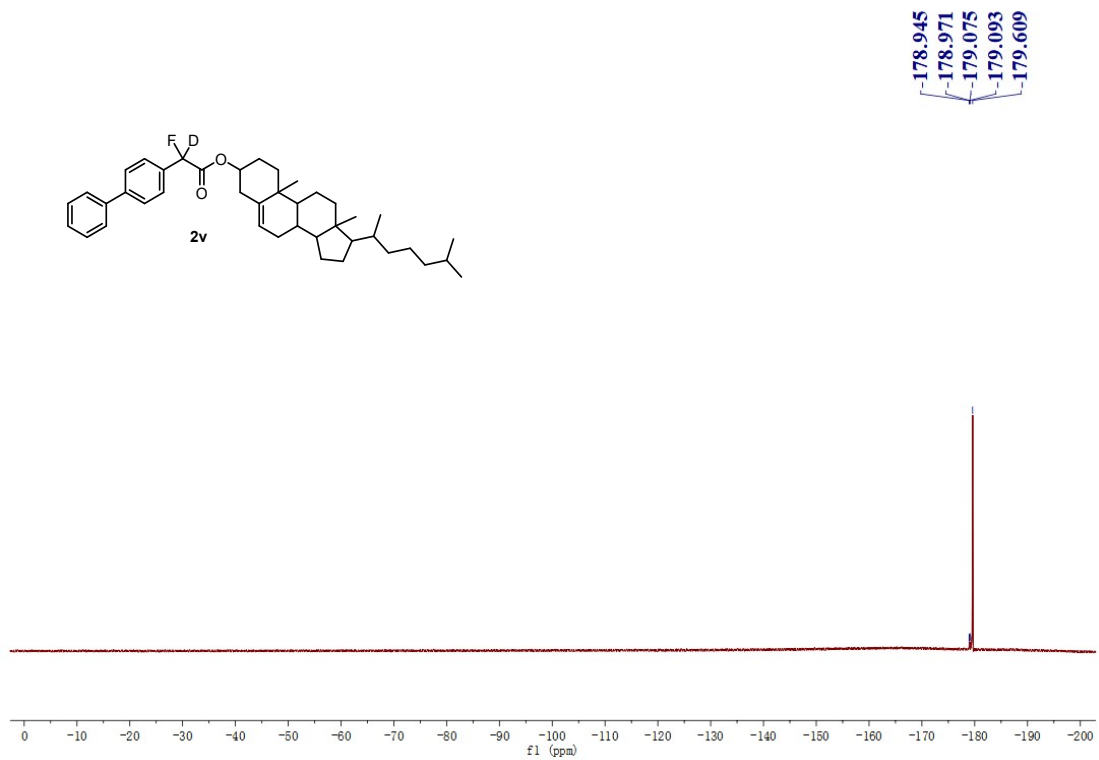

<sup>1</sup>H, <sup>13</sup>C NMR and <sup>19</sup>F spectra for compound 2w (Chloroform-d)

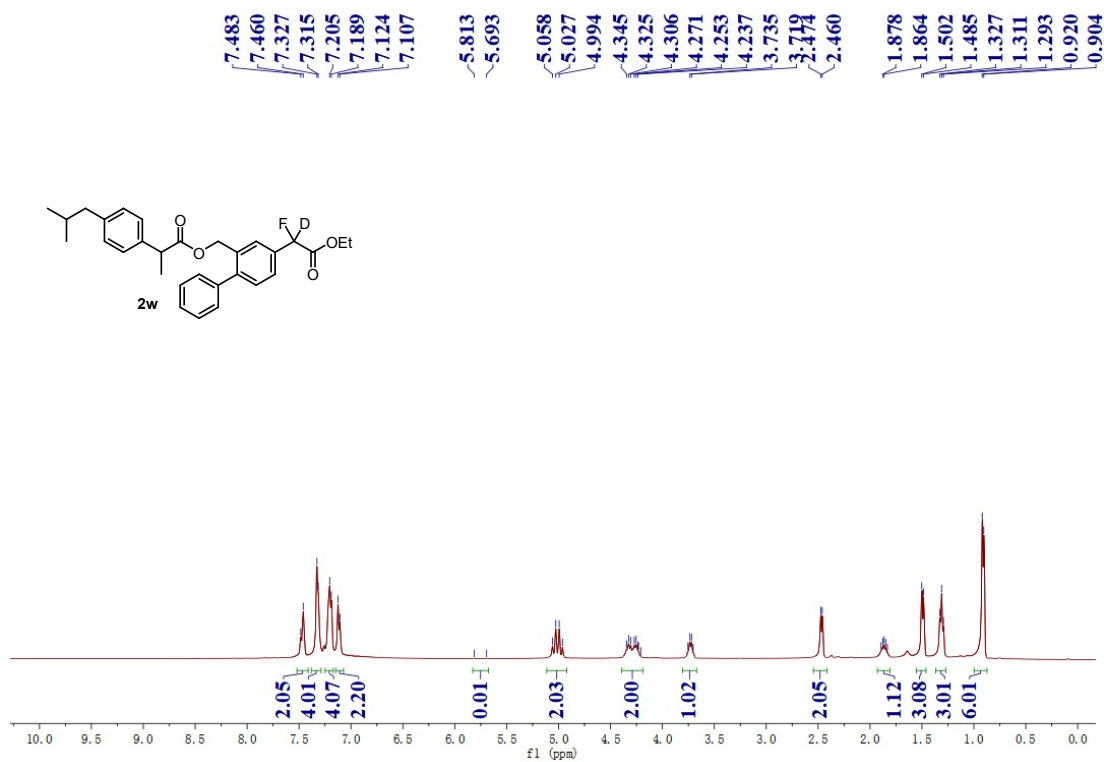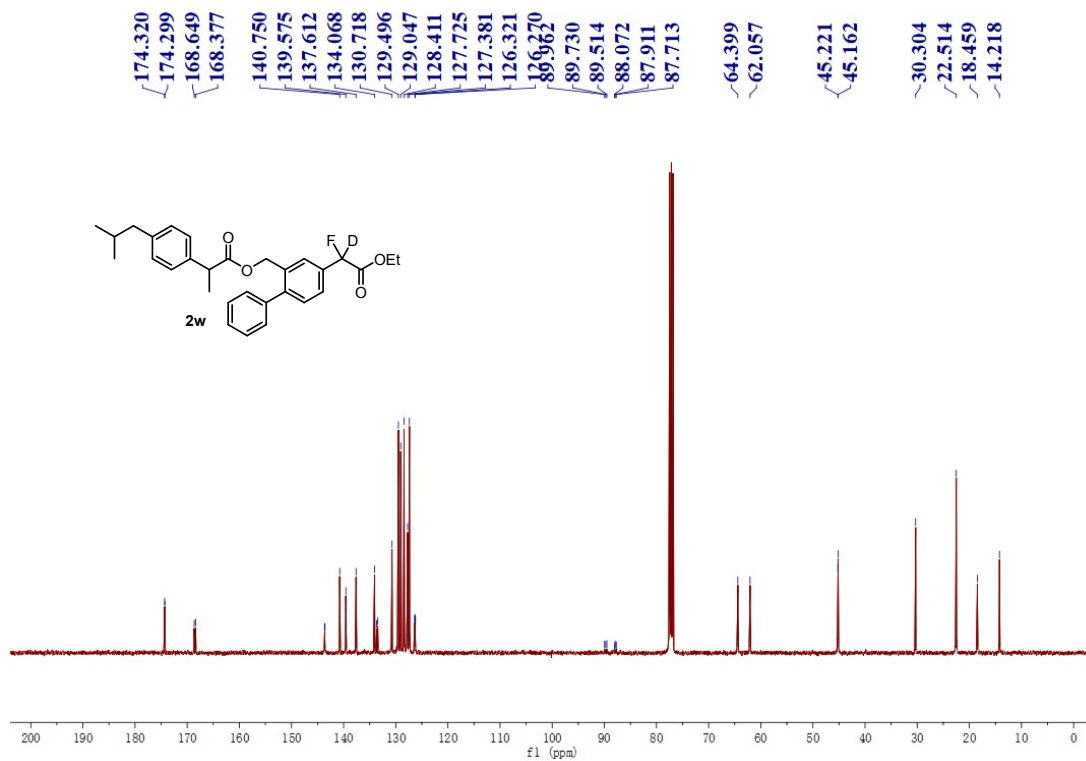

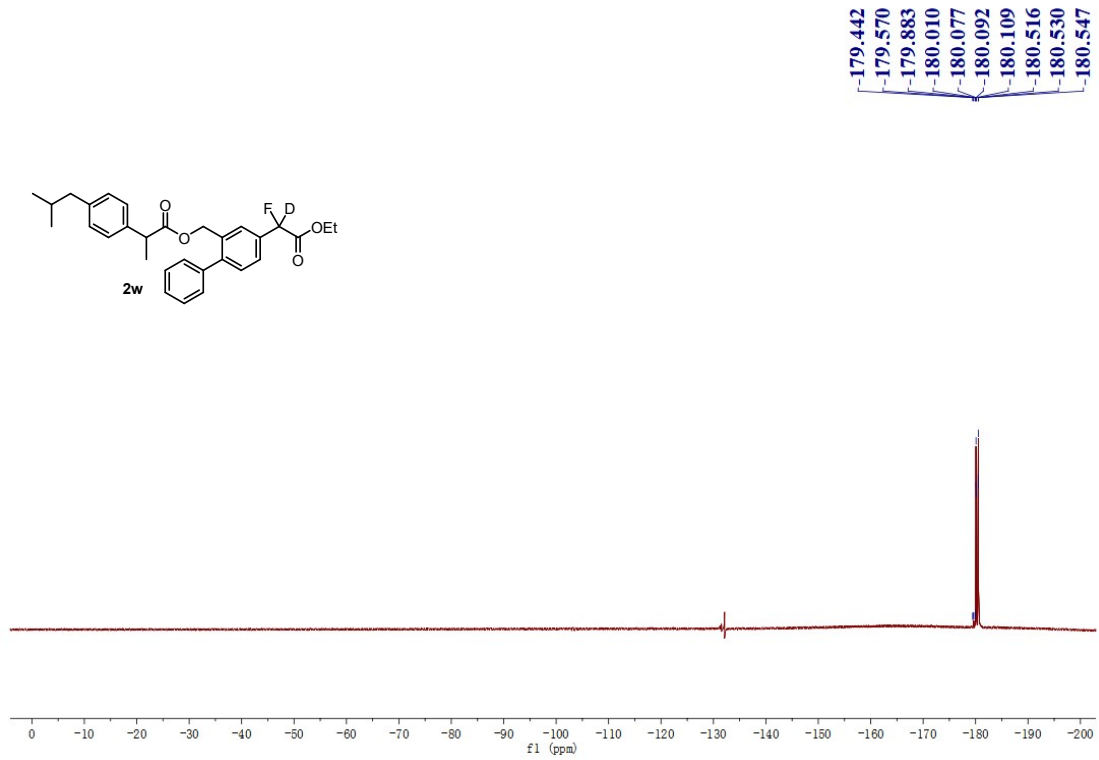

**<sup>1</sup>H and <sup>13</sup>C NMR spectra for compound 3a (Chloroform-d)**

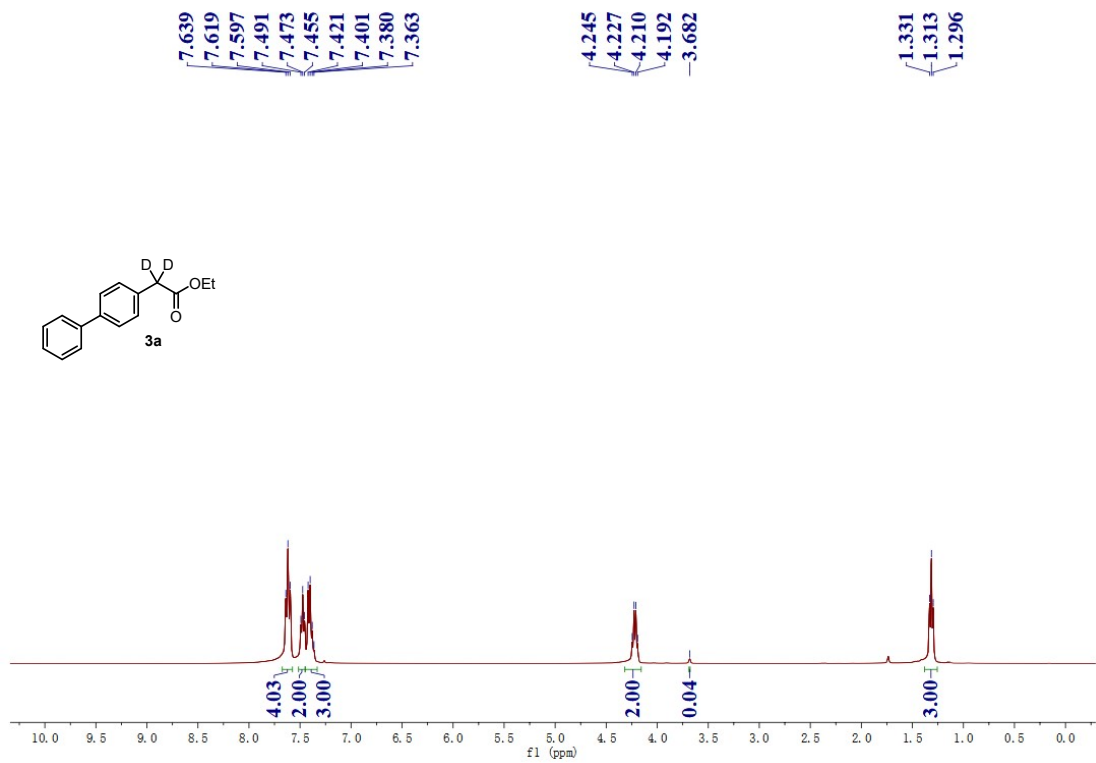

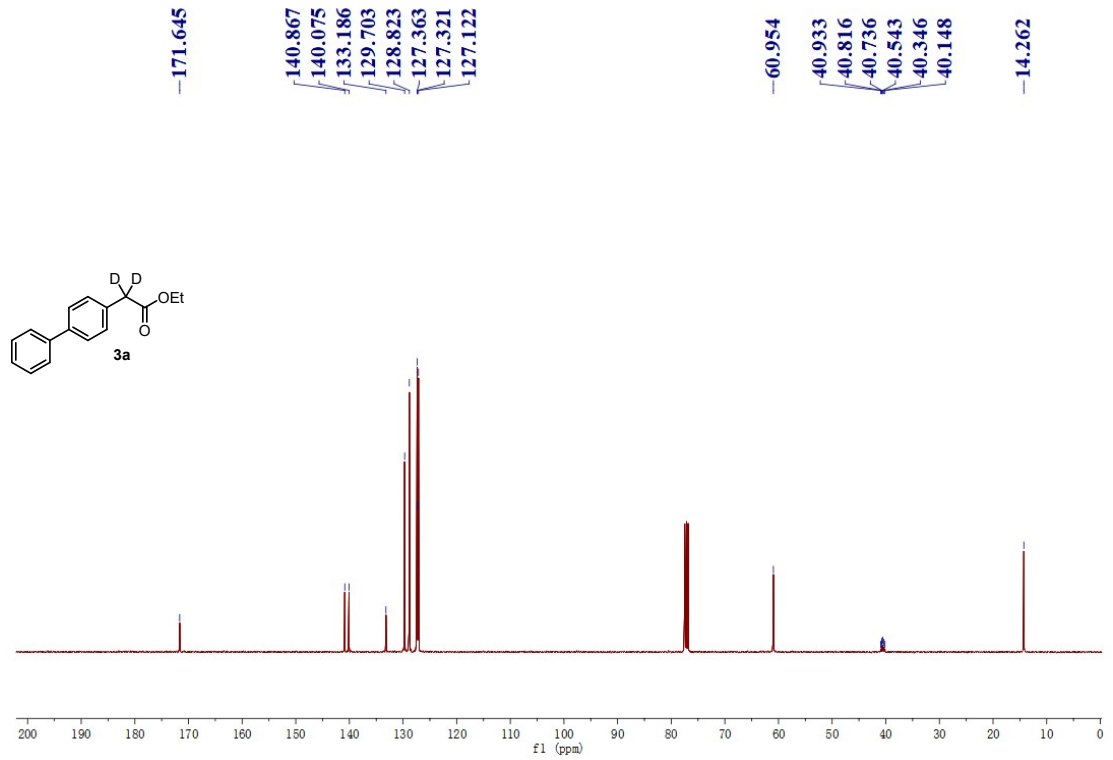

**<sup>1</sup>H and <sup>13</sup>C NMR spectra for compound 3b (Chloroform-d)**

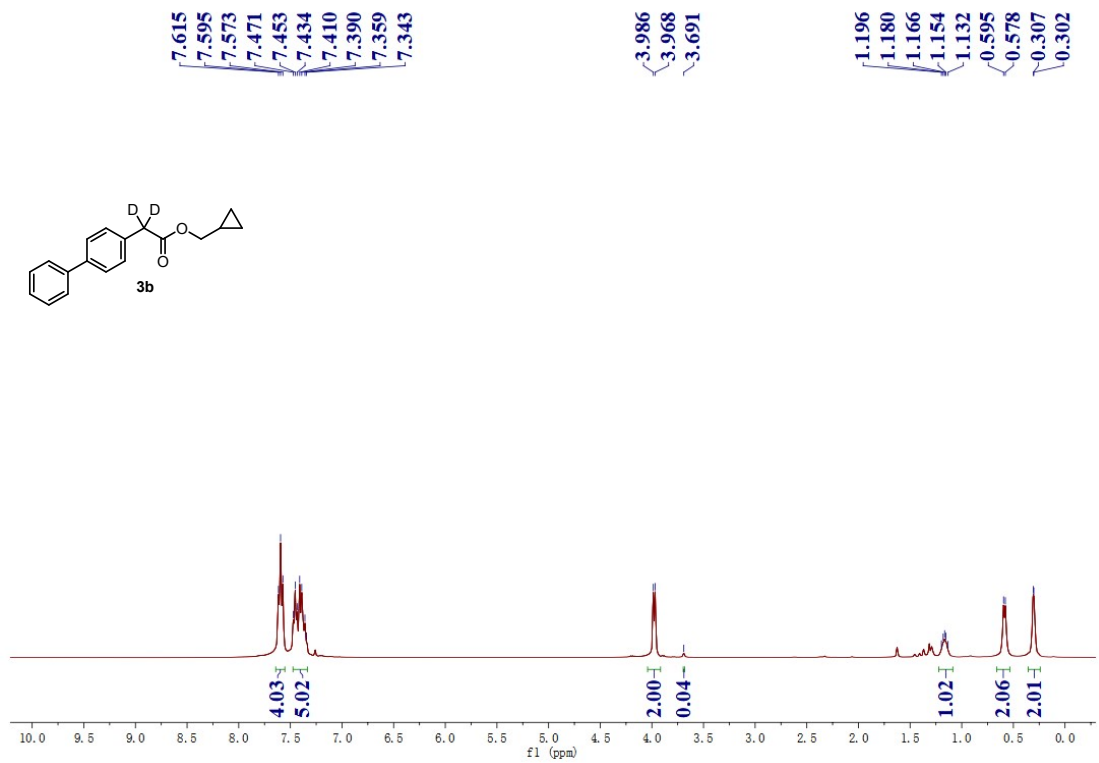

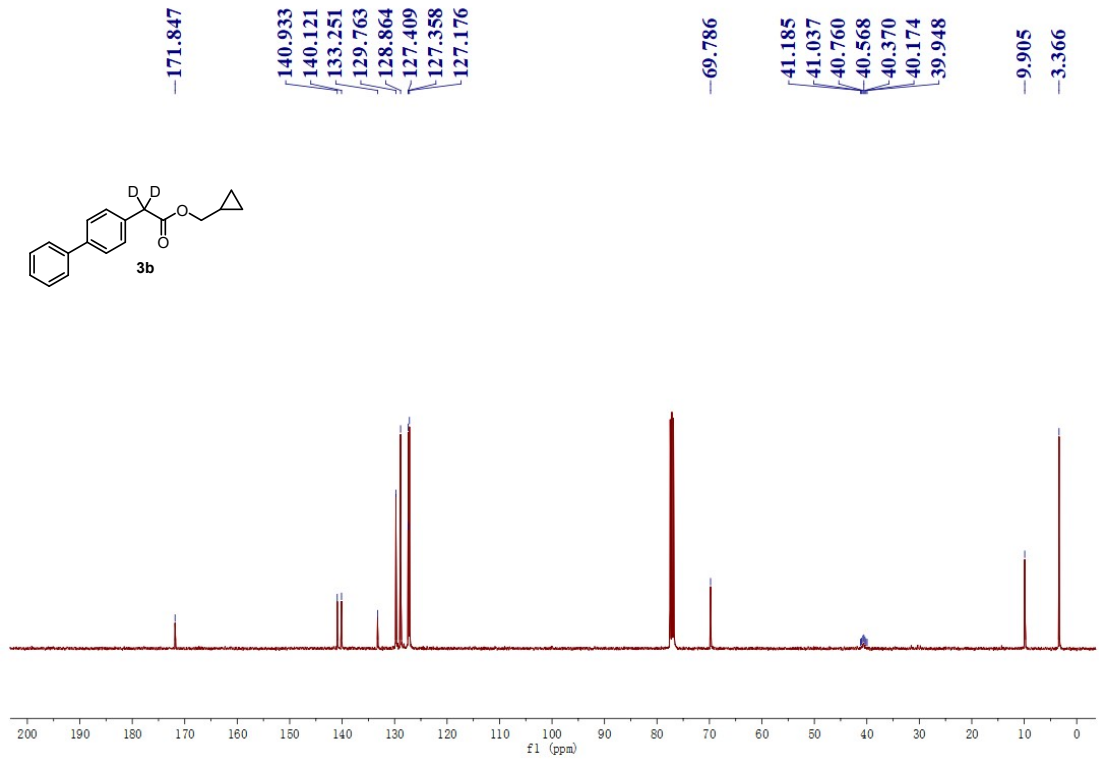

**<sup>1</sup>H and <sup>13</sup>C NMR spectra for compound 3c (Chloroform-d)**

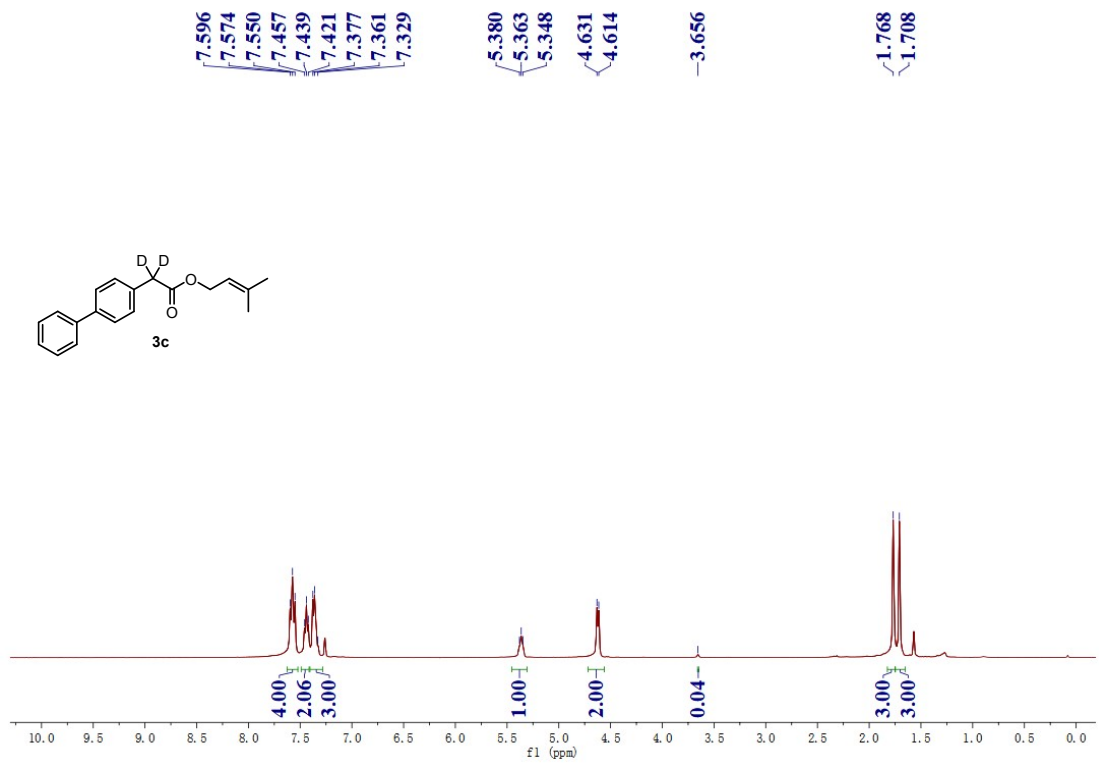



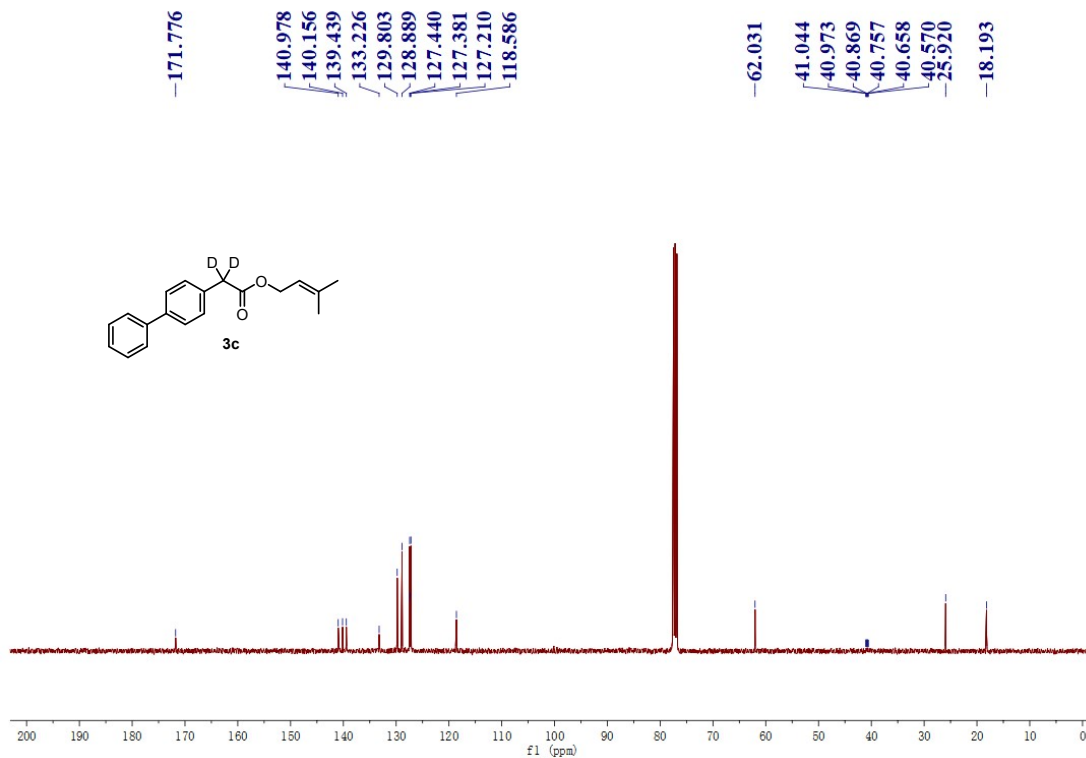

**<sup>1</sup>H and <sup>13</sup>C NMR spectra for compound 3d (Chloroform-d)**

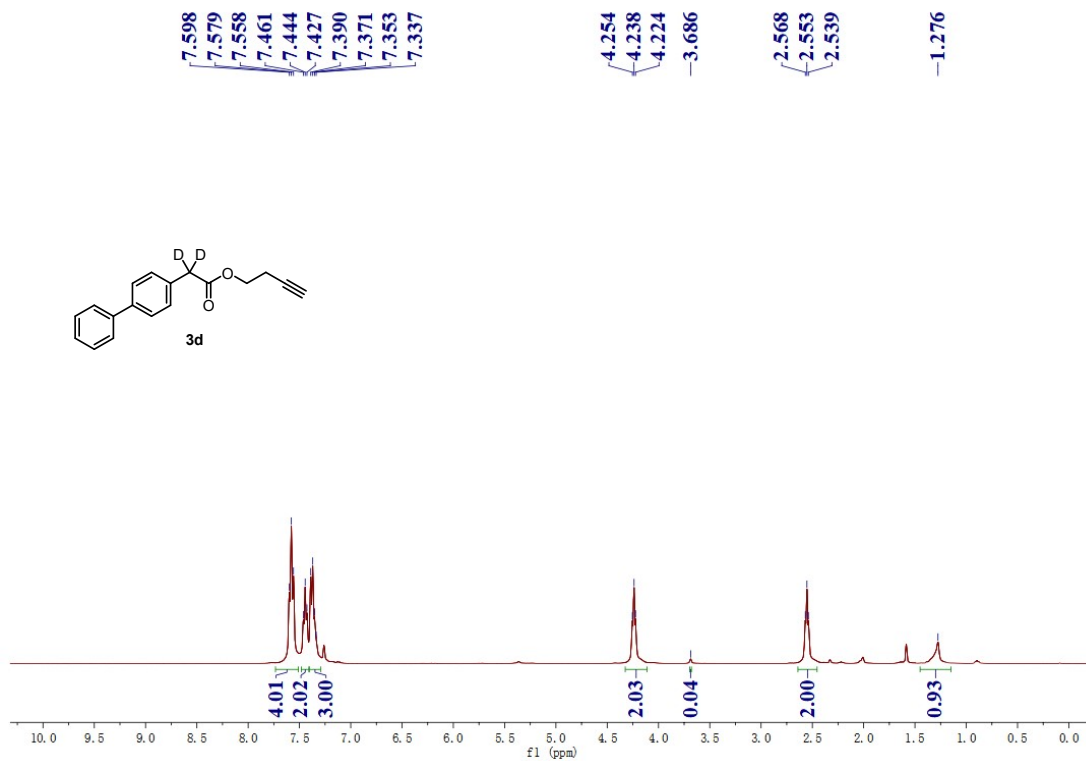

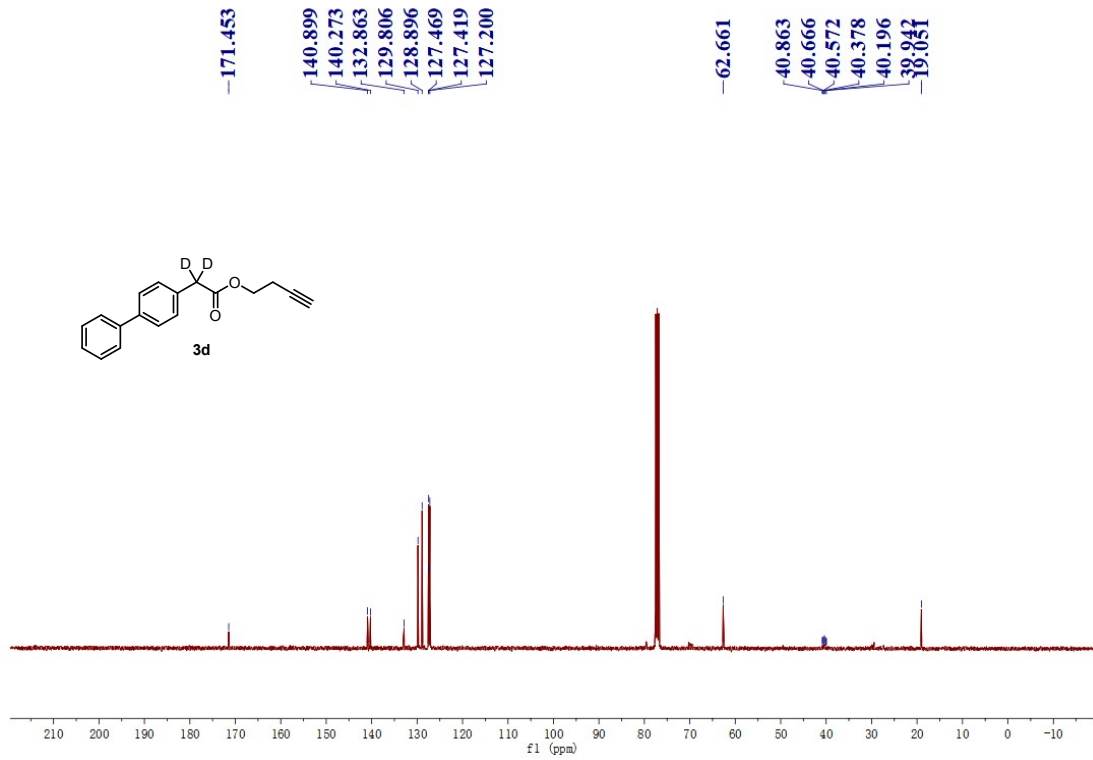

**<sup>1</sup>H and <sup>13</sup>C NMR spectra for compound 3e (Chloroform-d)**

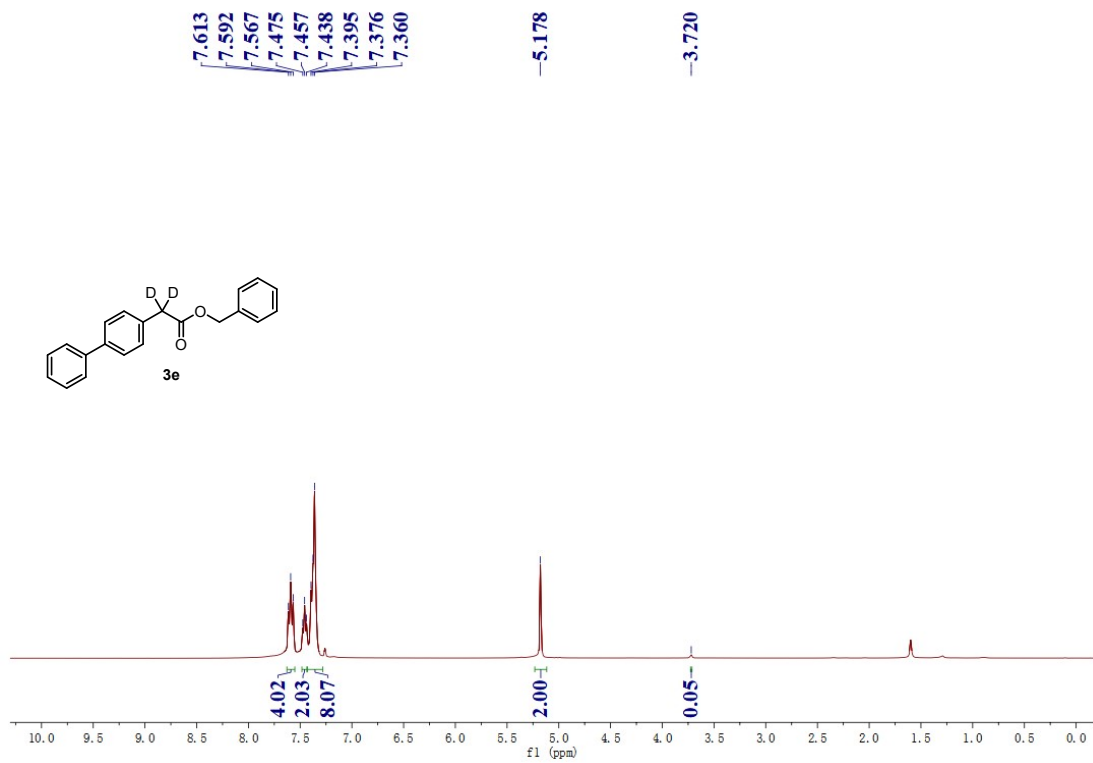



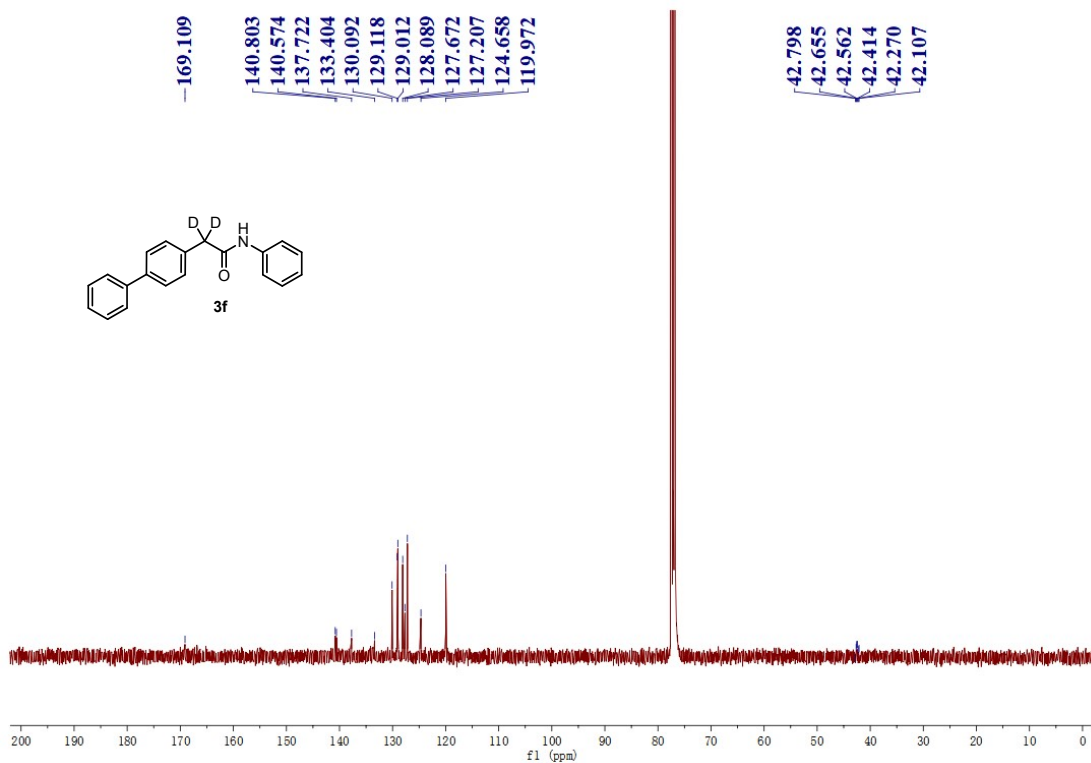

<sup>1</sup>H and <sup>13</sup>C NMR spectra for compound 3g (Chloroform-d)

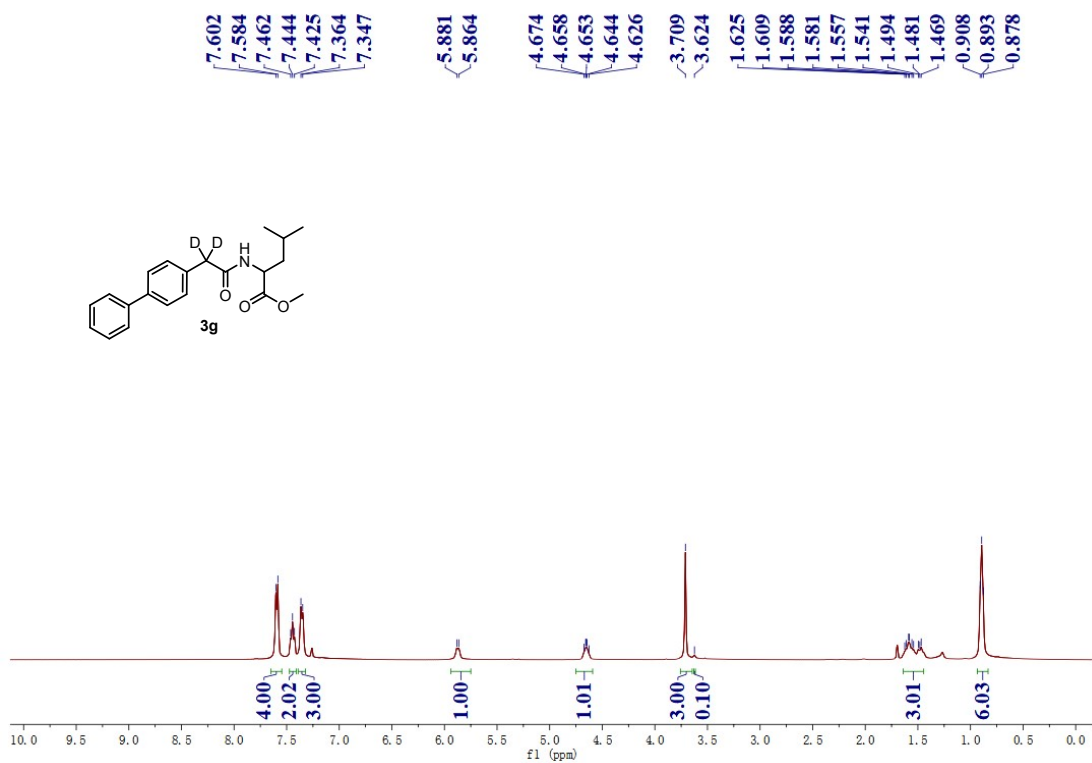

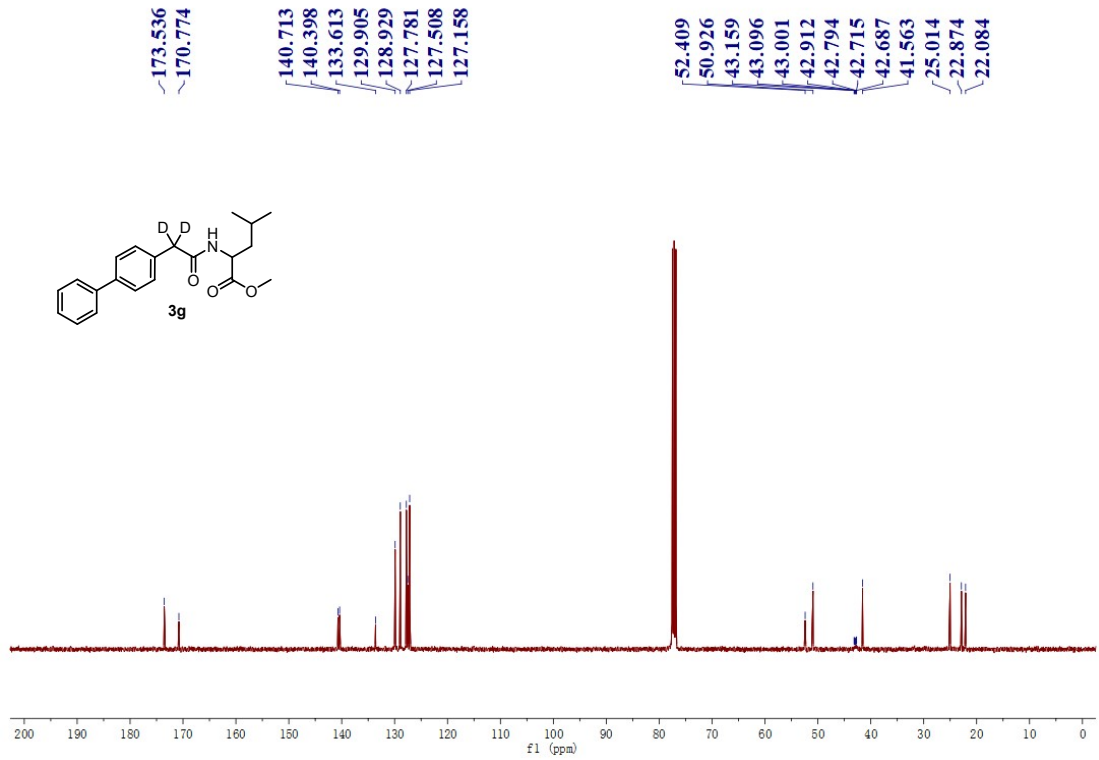

**<sup>1</sup>H and <sup>13</sup>C NMR spectra for compound 3h (Chloroform-d)**

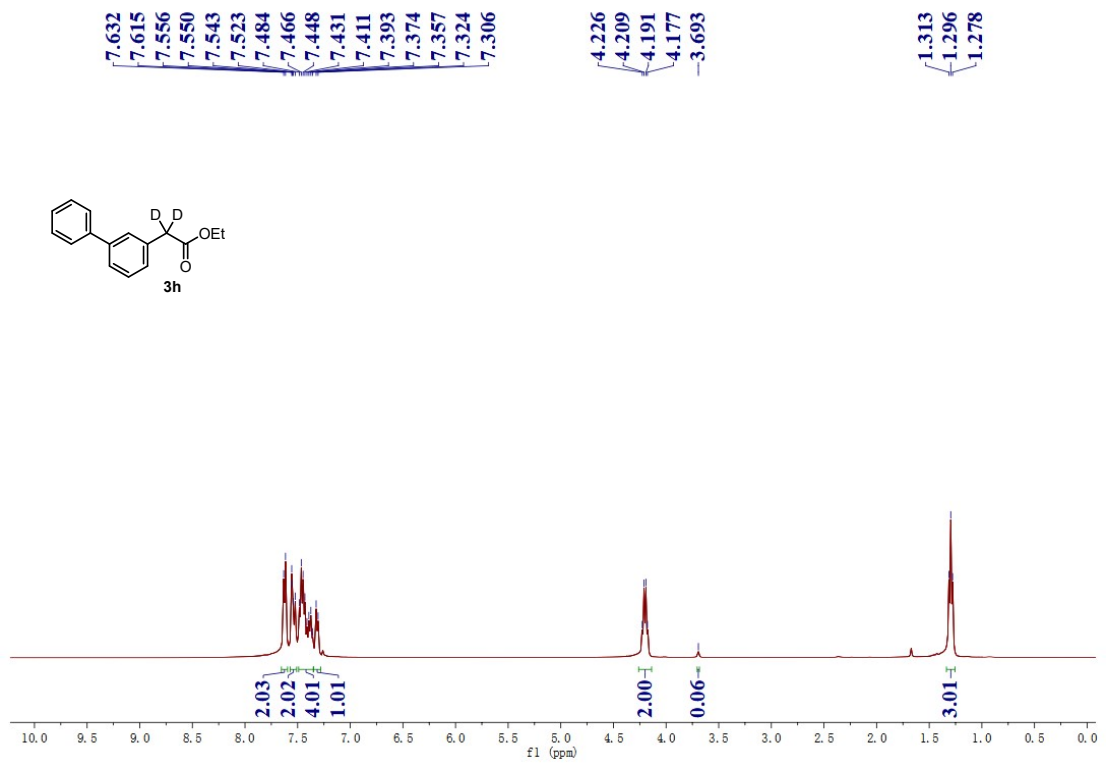

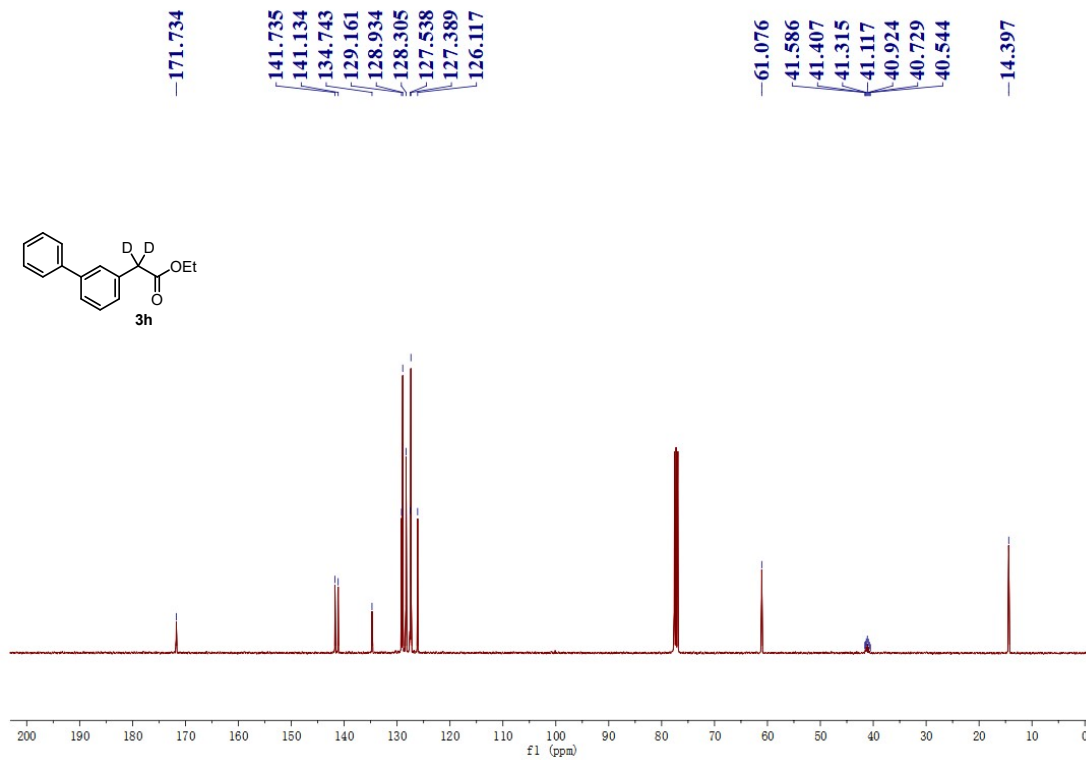

**<sup>1</sup>H, <sup>13</sup>C and <sup>19</sup>F NMR spectra for compound 3i (Chloroform-d)**

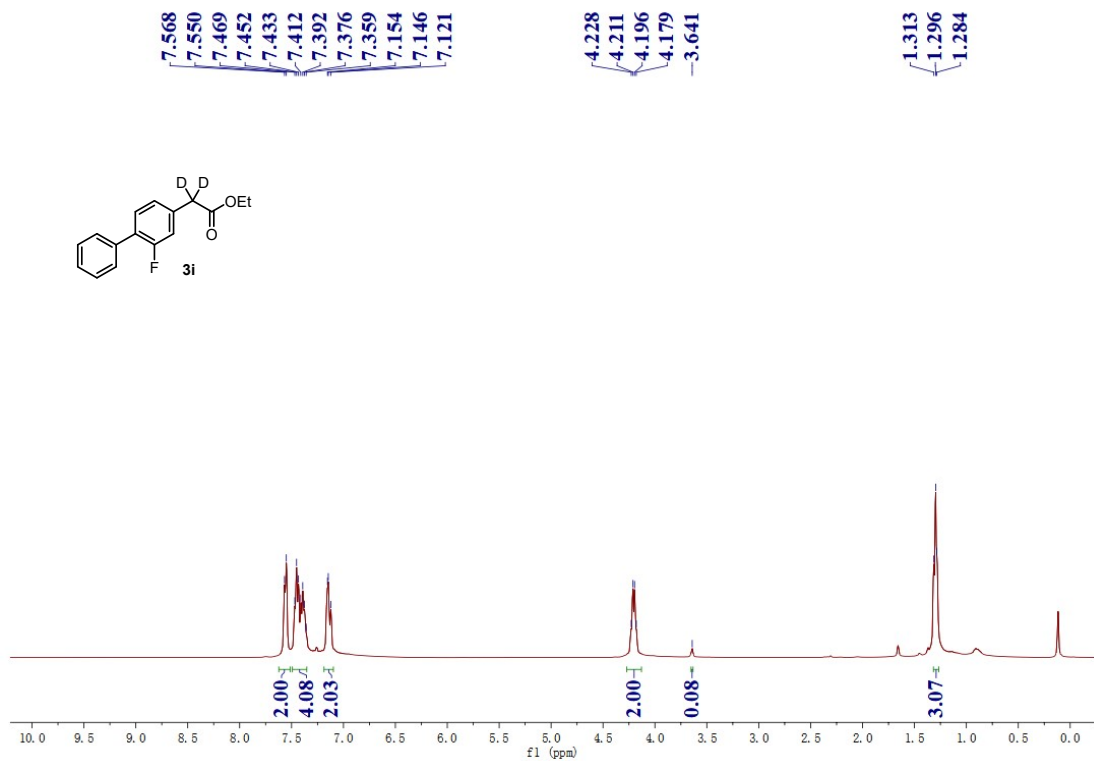

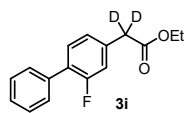

171.126  
 160.934  
 158.467  
 135.632  
 135.450  
 135.369  
 130.874  
 130.835  
 129.078  
 129.050  
 128.541  
 127.971  
 127.837  
 127.756  
 125.376  
 125.348  
 117.187  
 116.953

61.177

40.793  
 40.698  
 40.513  
 40.326  
 40.128

14.277

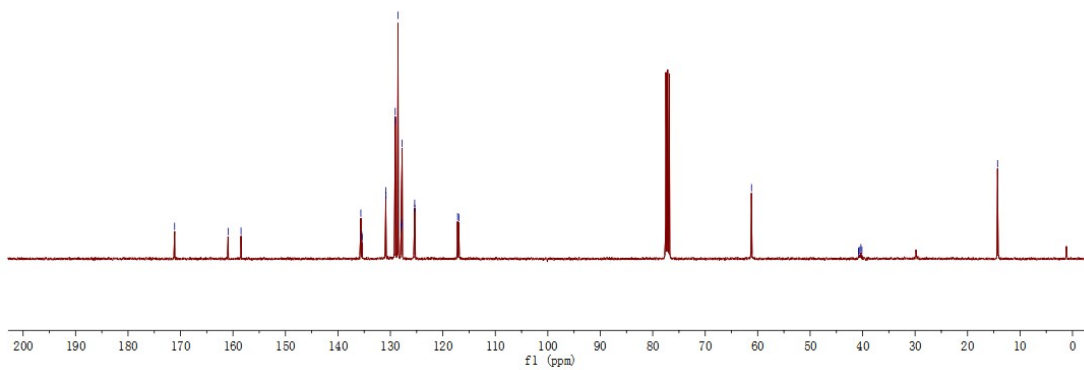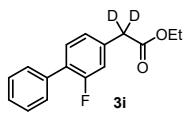

117.906  
 117.932  
 117.957

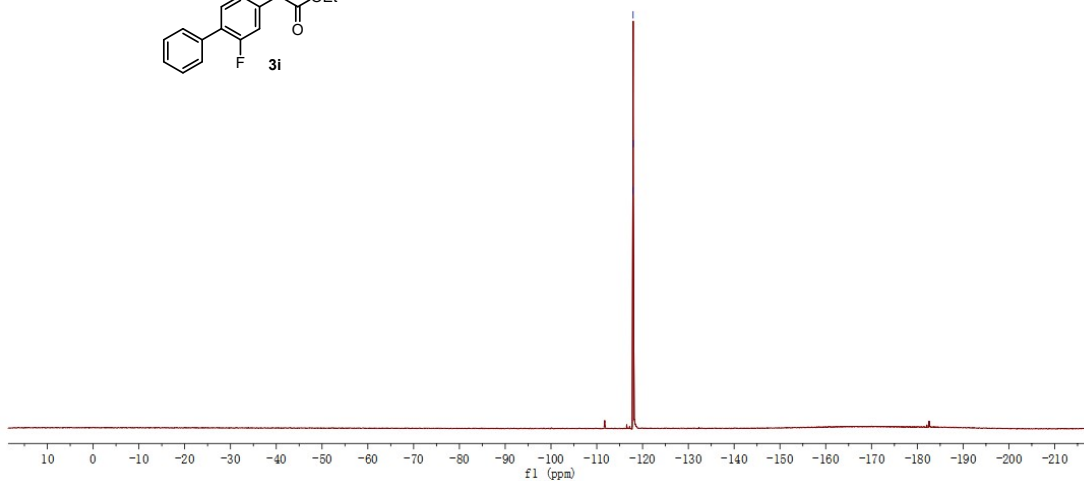

<sup>1</sup>H and <sup>13</sup>C NMR spectra for compound 3j (Chloroform-d)

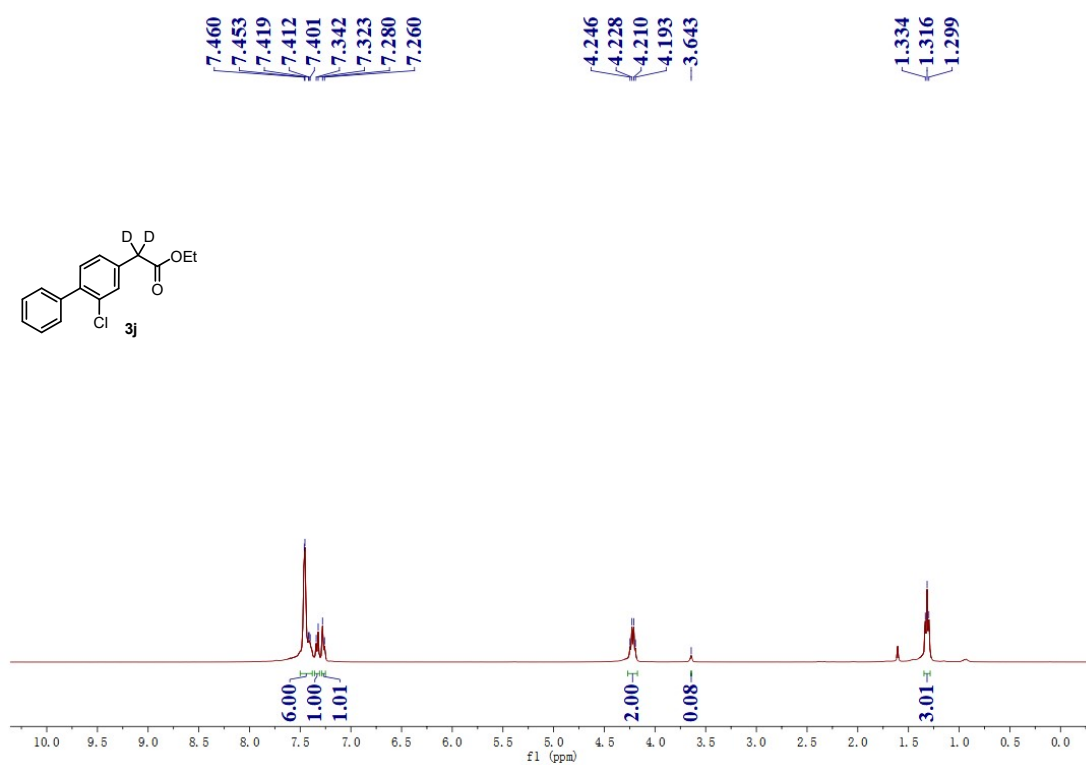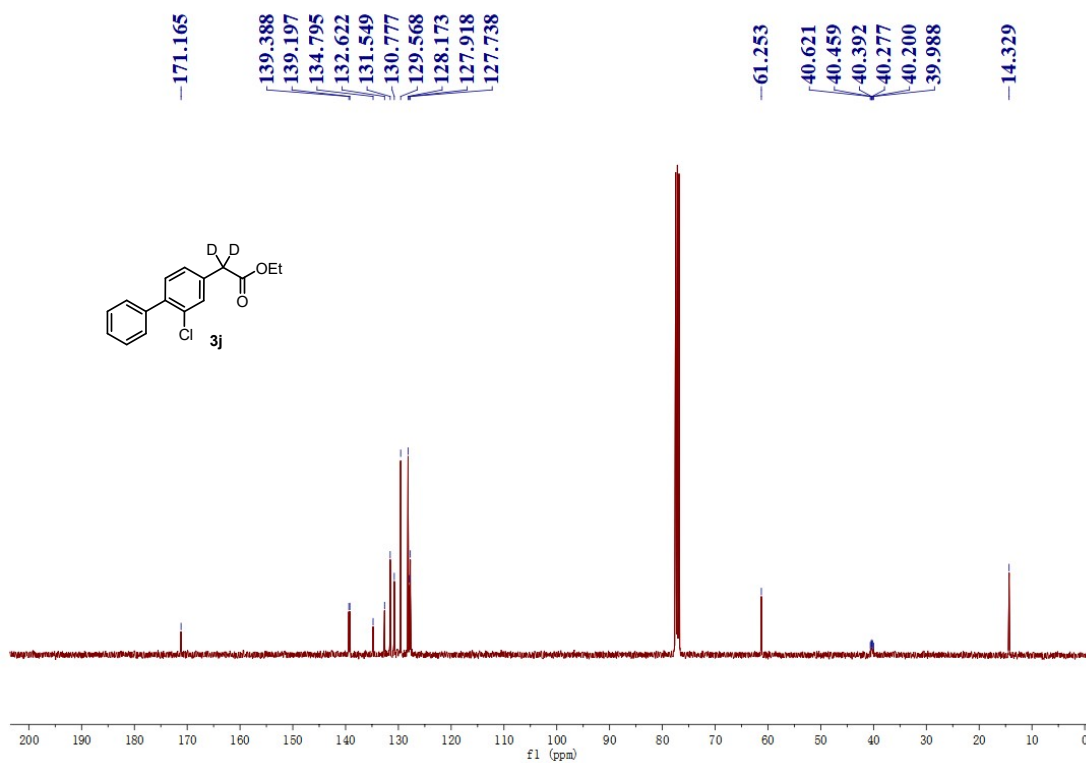



**<sup>1</sup>H and <sup>13</sup>C NMR spectra for compound 3k (Chloroform-d)**

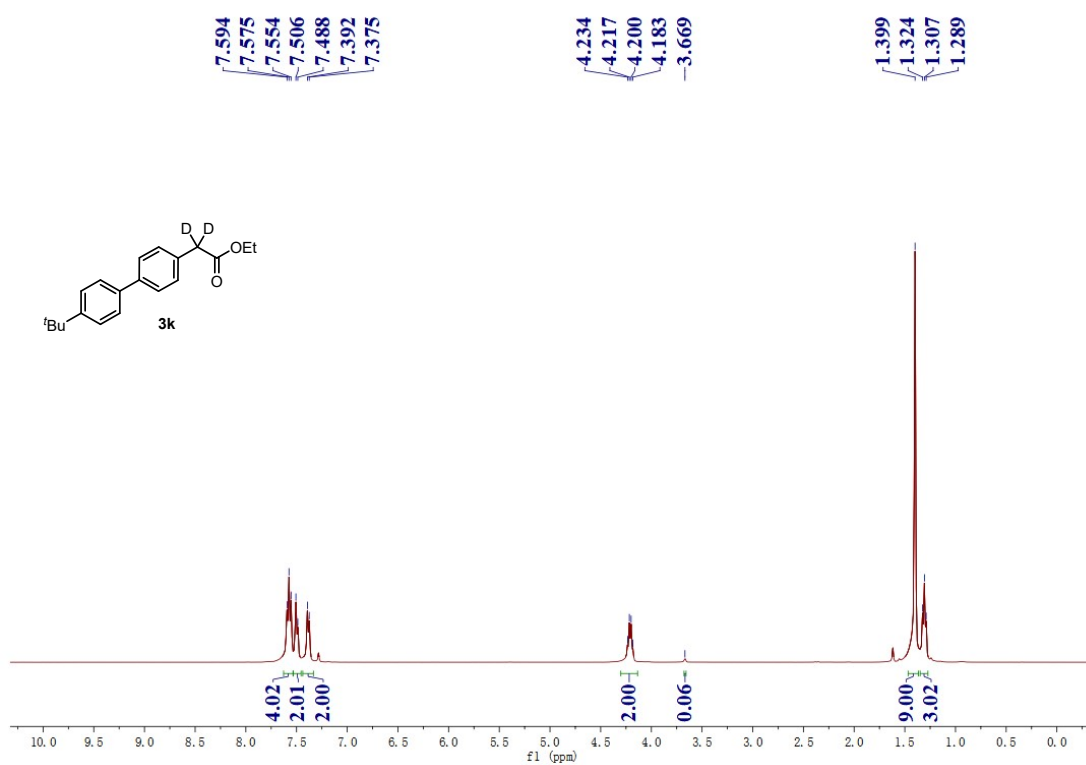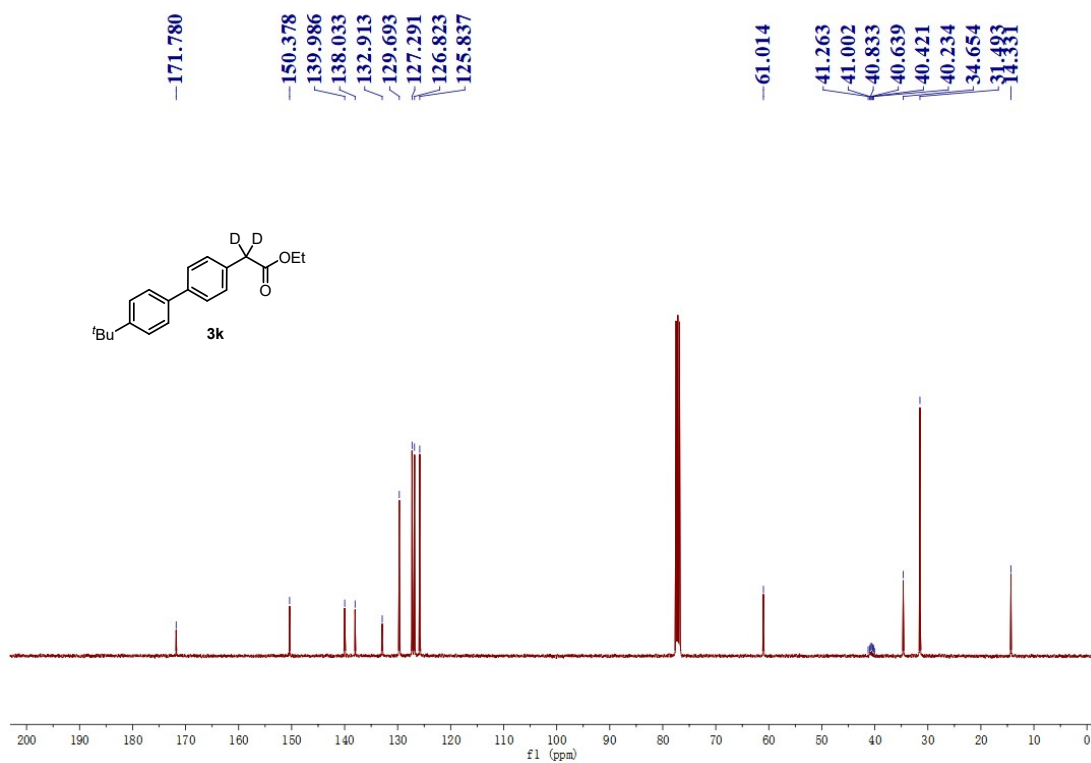

**<sup>1</sup>H and <sup>13</sup>C NMR spectra for compound 3I (Chloroform-d)**

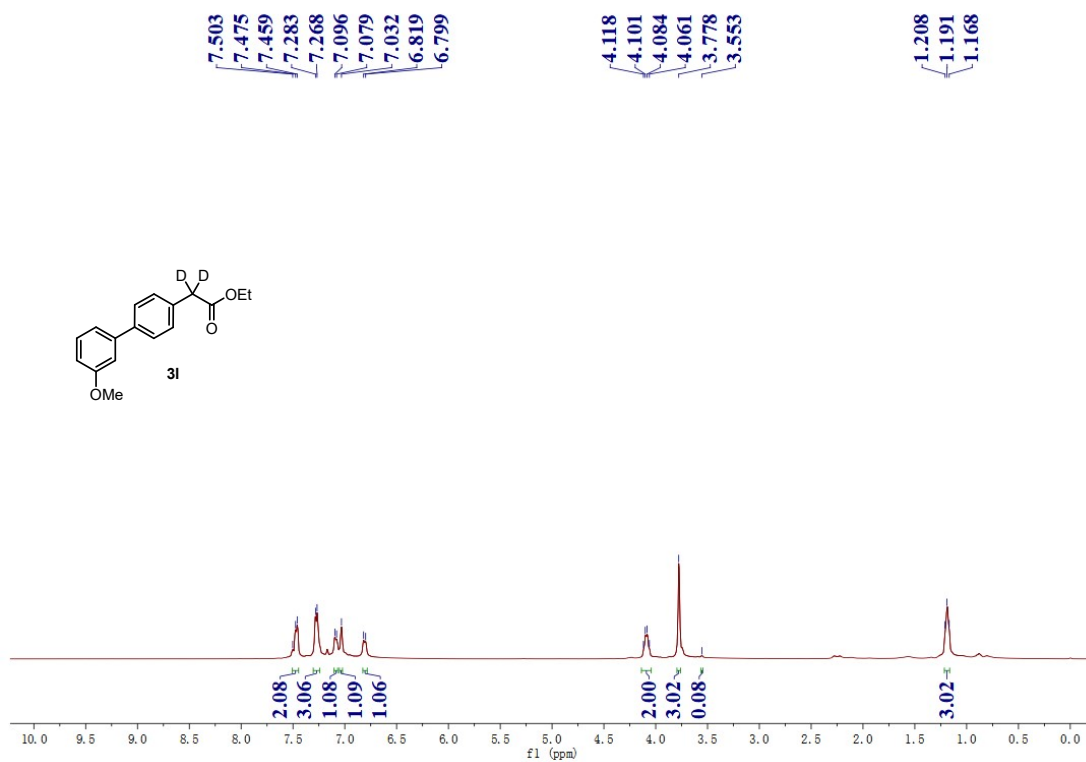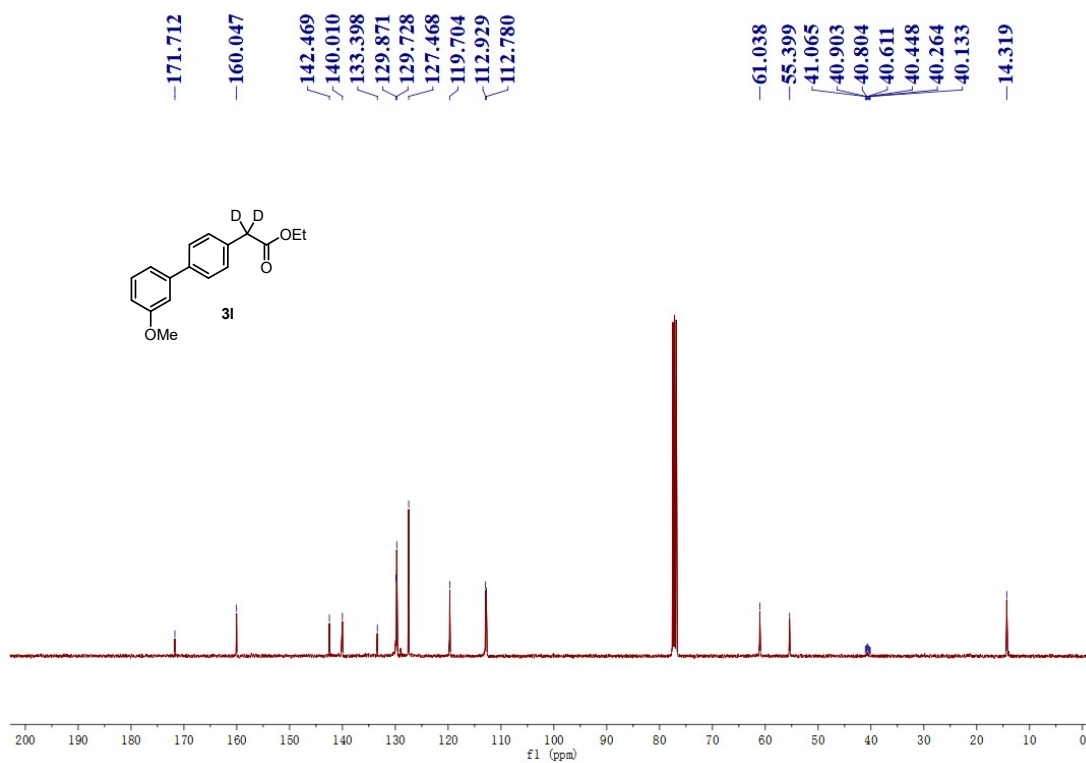

<sup>1</sup>H and <sup>13</sup>C NMR spectra for compound 3m (Chloroform-d)

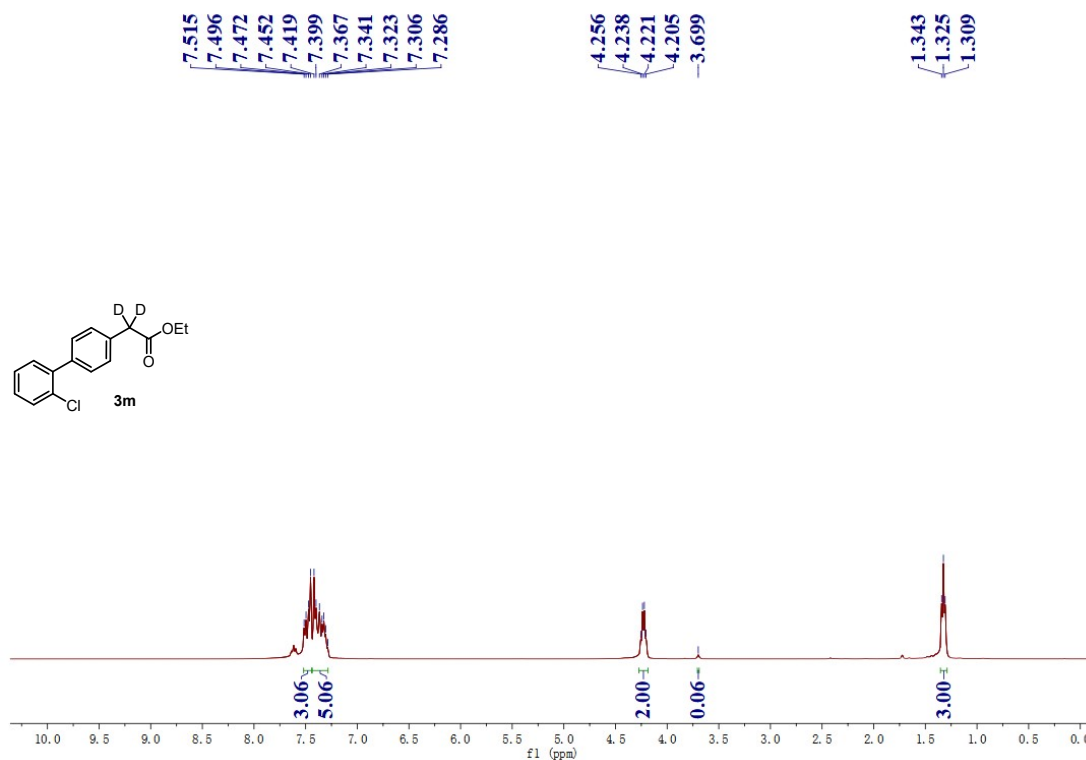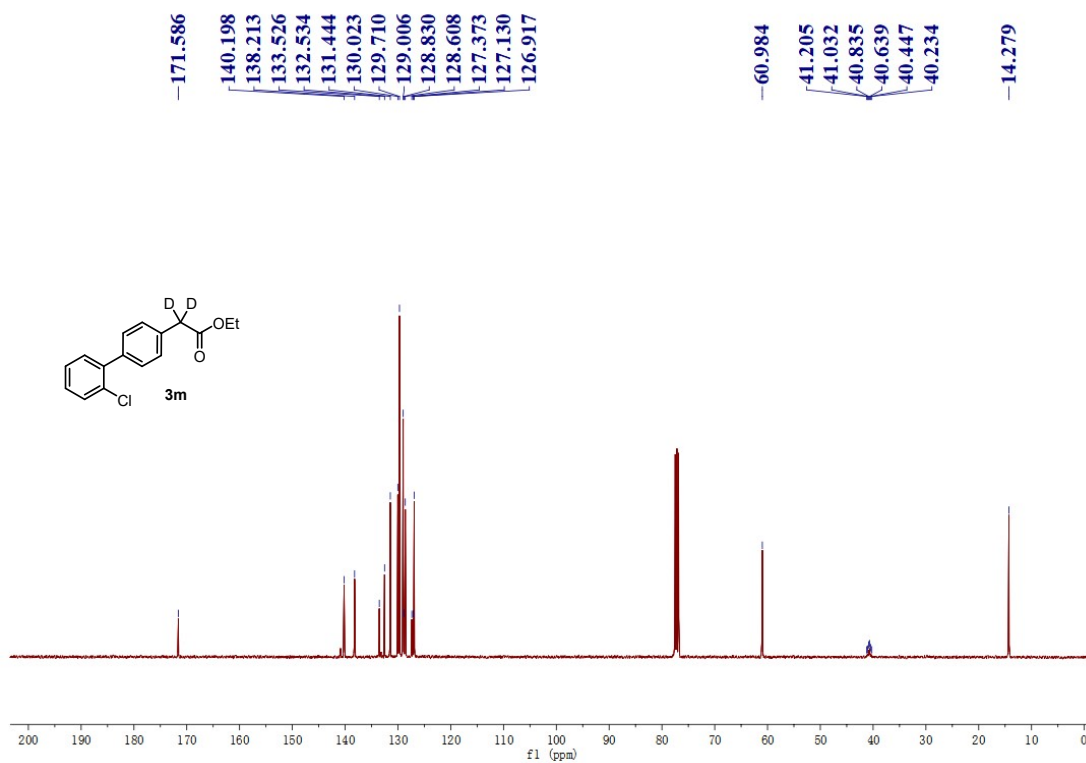

**$^1\text{H}$  and  $^{13}\text{C}$  NMR spectra for compound 3n (Chloroform-d)**

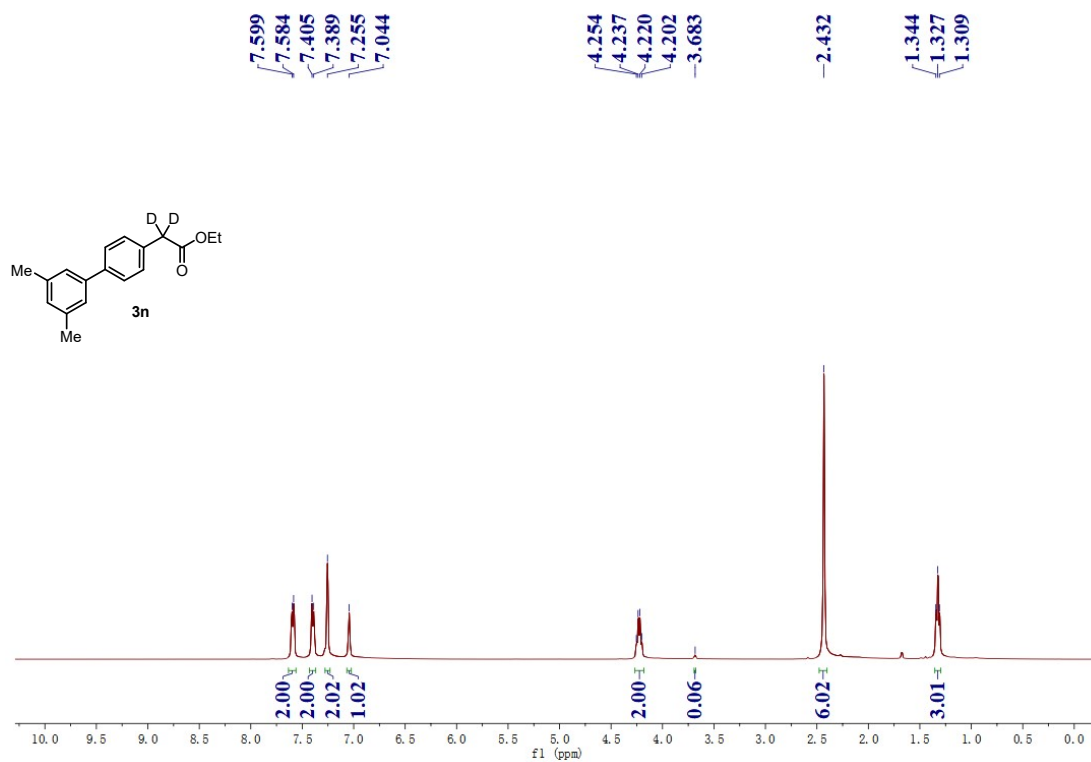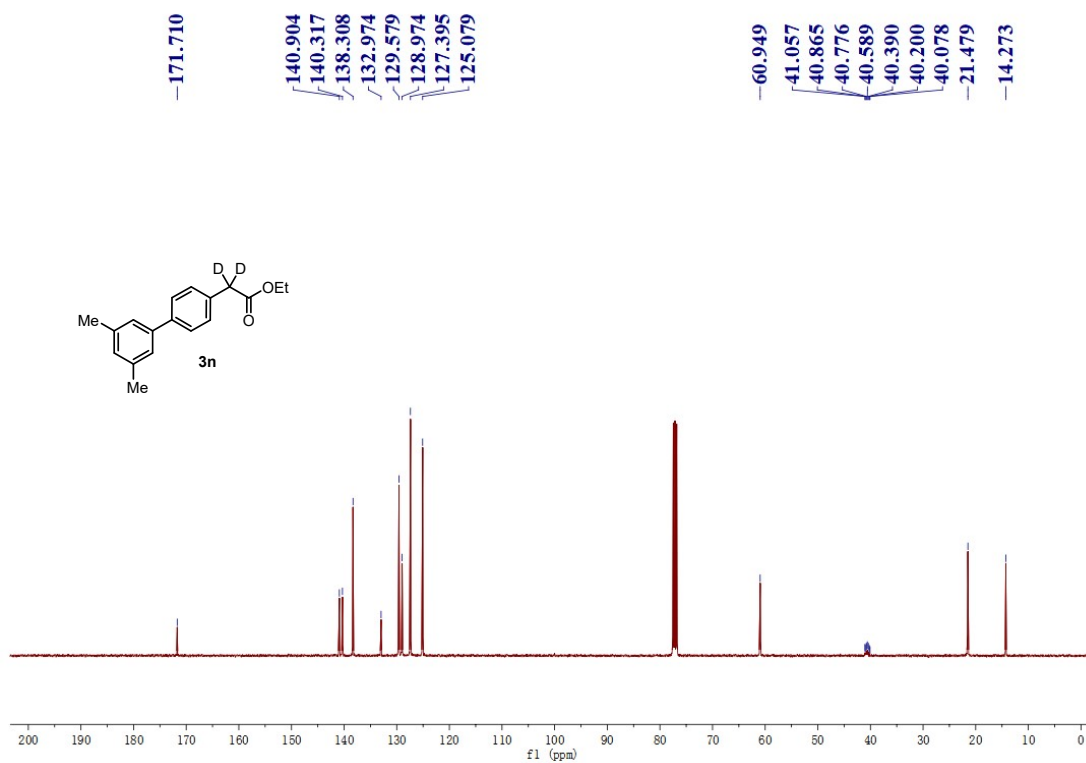

**<sup>1</sup>H and <sup>13</sup>C NMR spectra for compound 3o (Chloroform-d)**

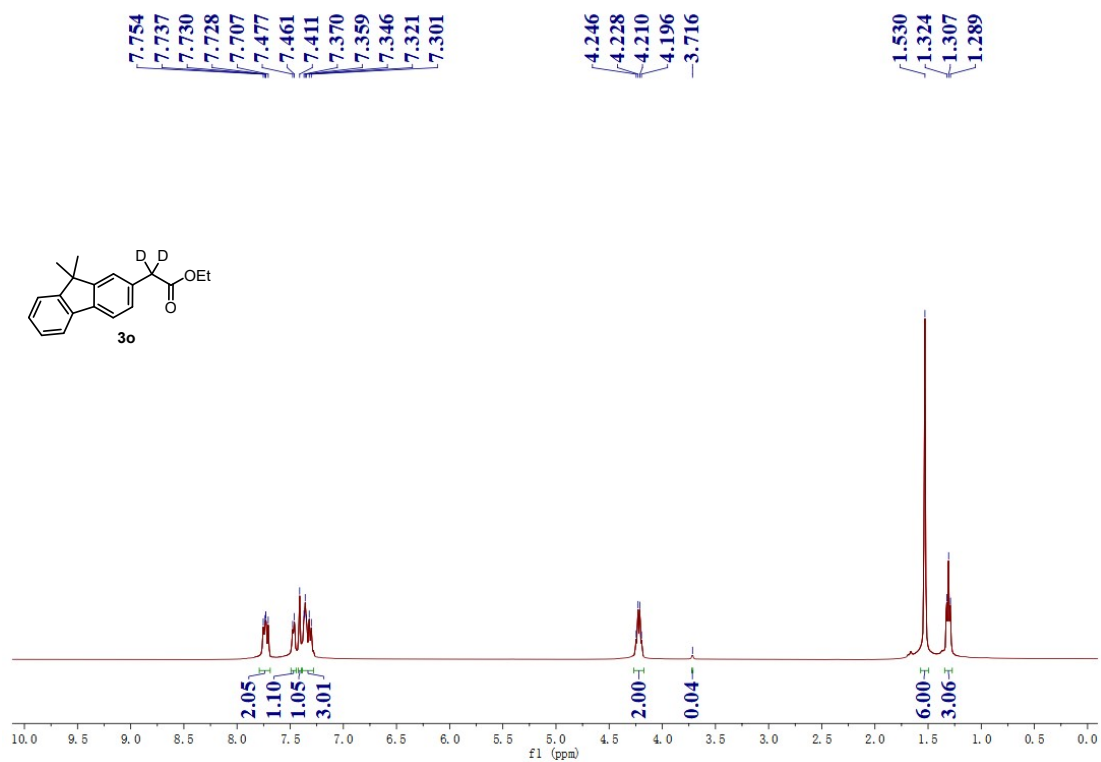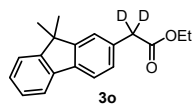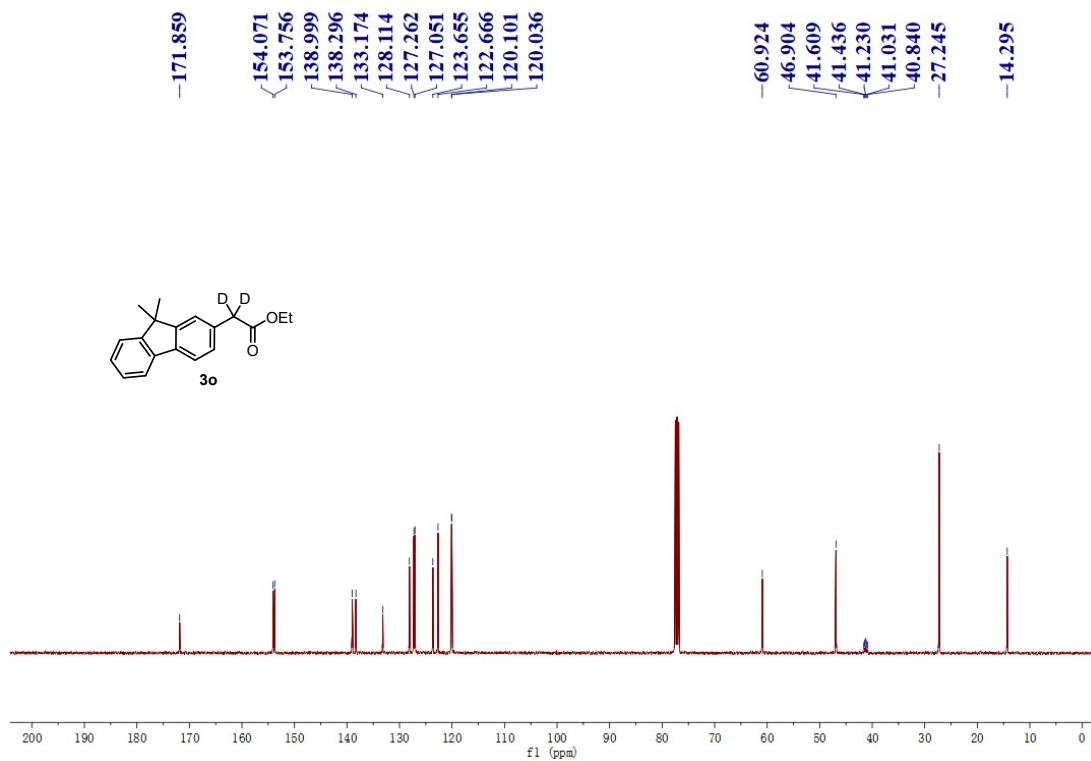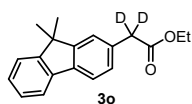

**<sup>1</sup>H and <sup>13</sup>C NMR spectra for compound 3p (Chloroform-d)**

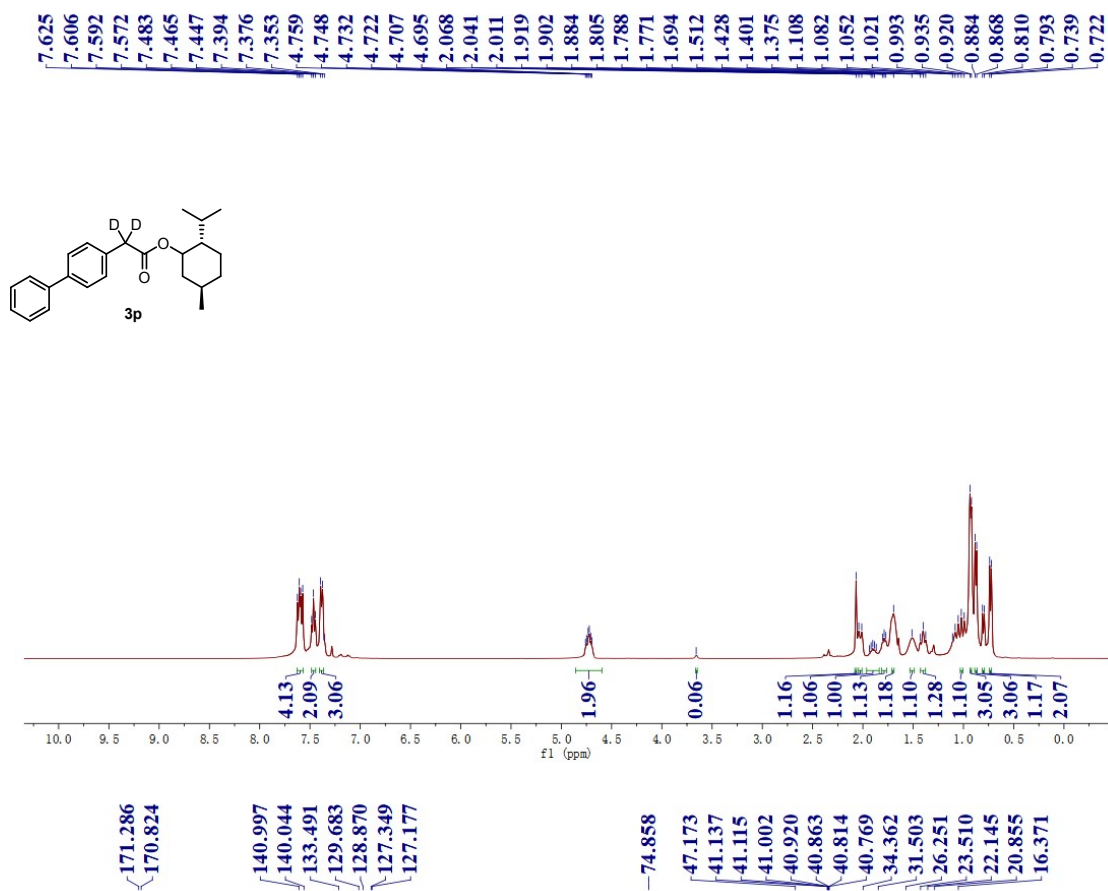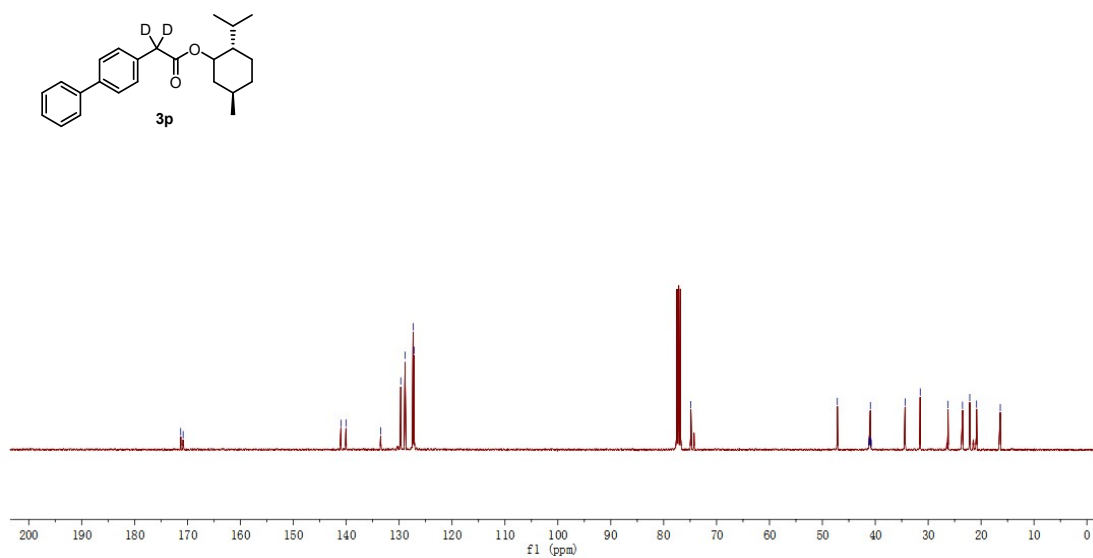

# <sup>1</sup>H and <sup>13</sup>C NMR spectra for compound 3q (Chloroform-d)

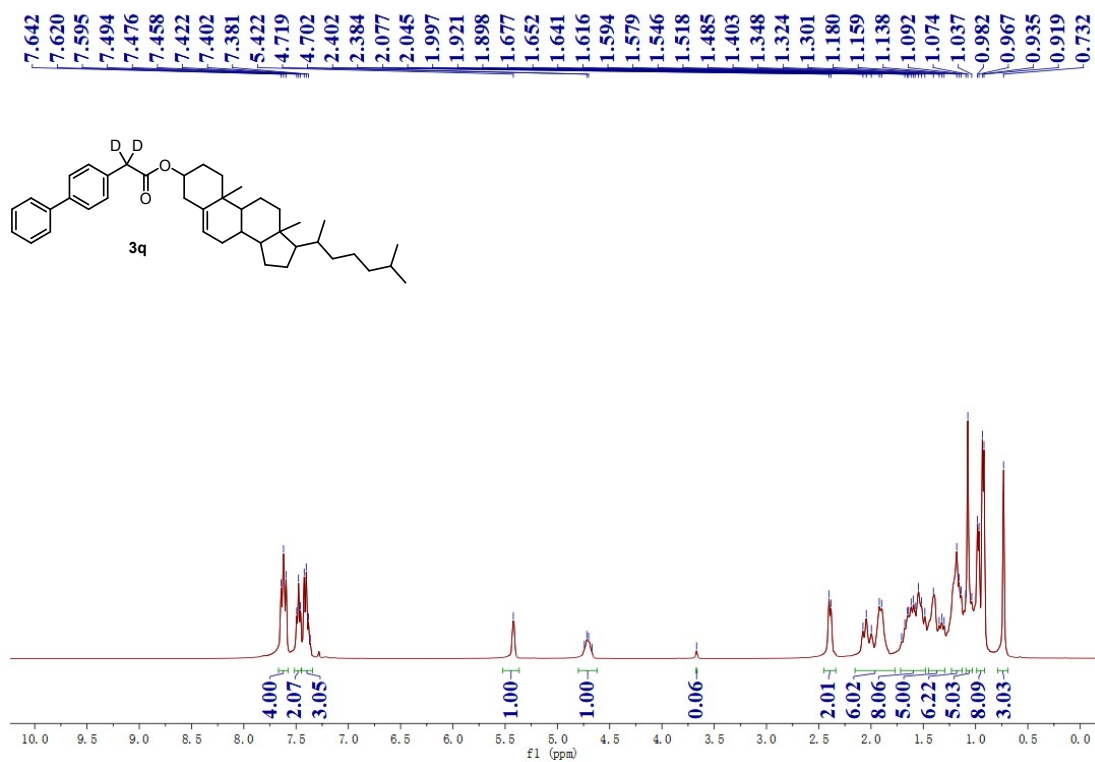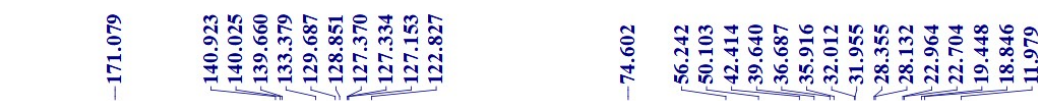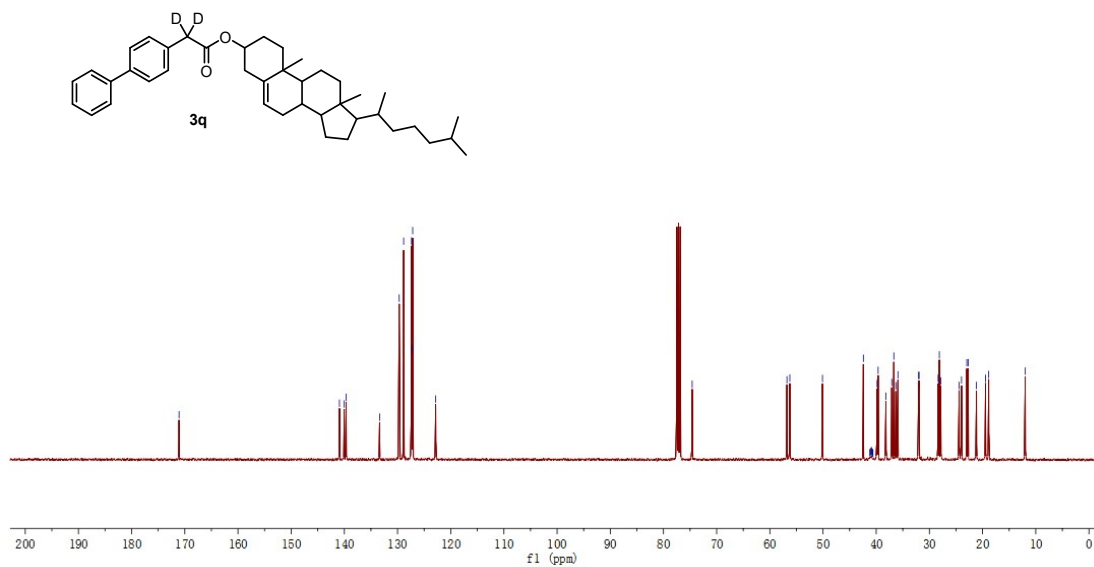

**$^1\text{H}$  and  $^{13}\text{C}$  NMR spectra for compound 3r (Chloroform-d)**

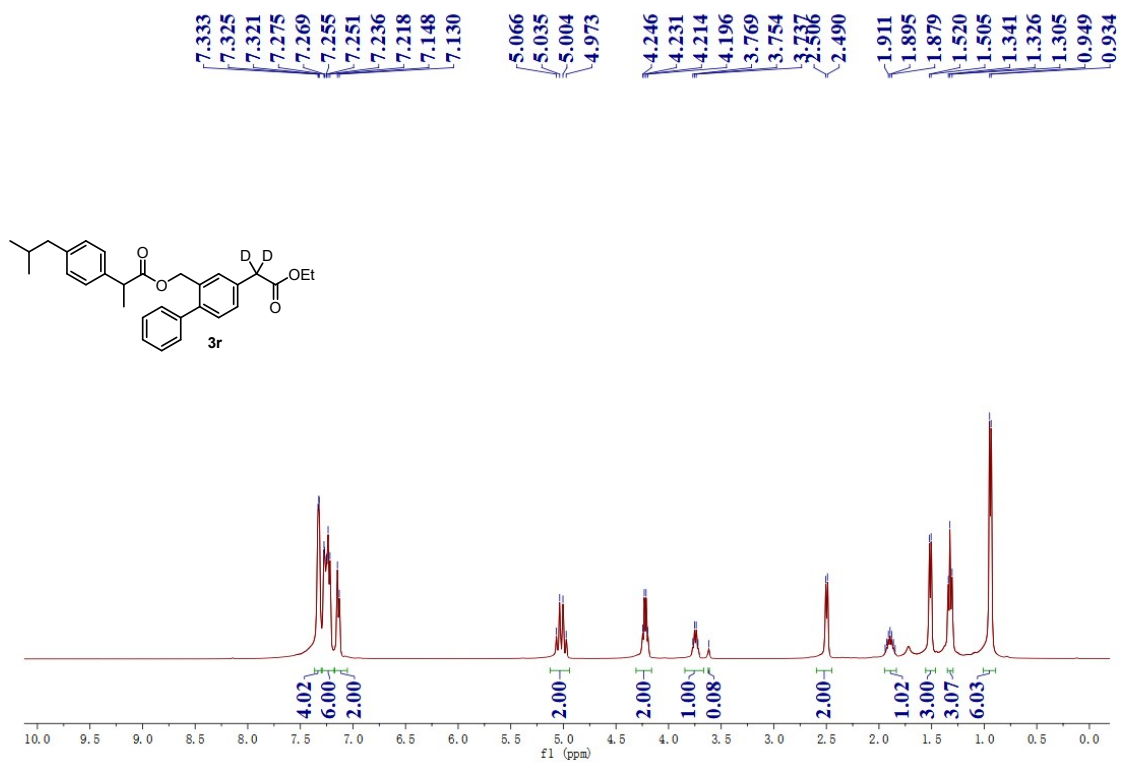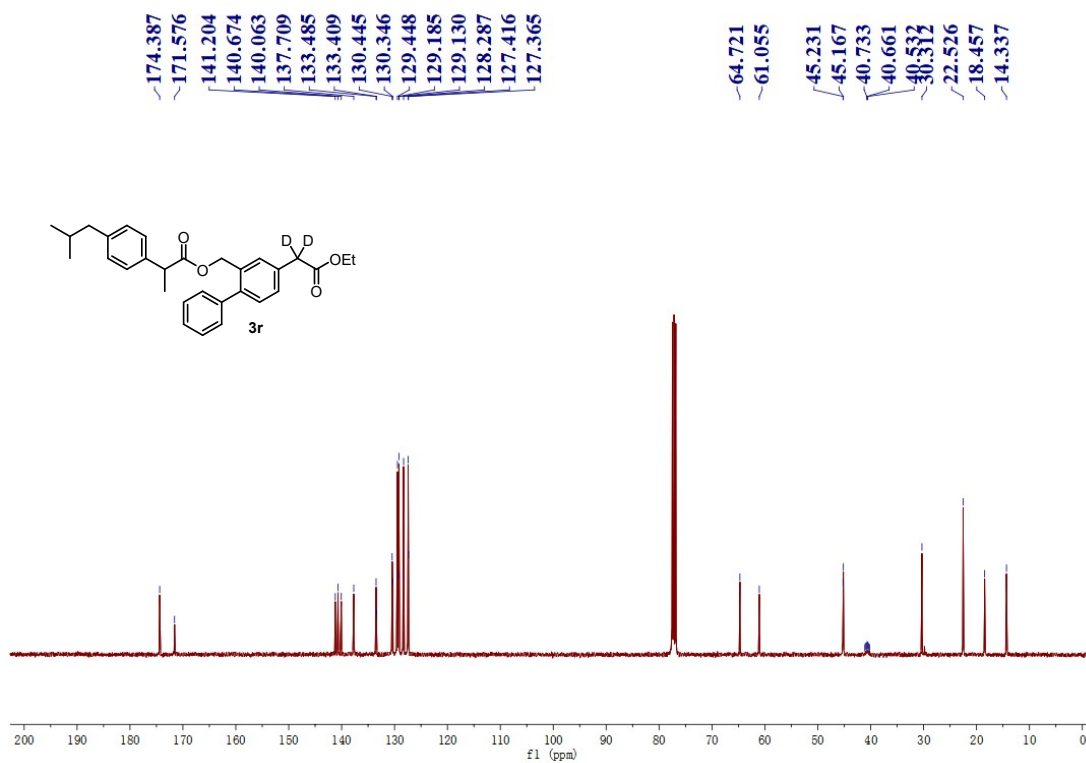



<sup>1</sup>H, <sup>13</sup>C NMR and <sup>19</sup>F spectra for compound 4a (Chloroform-d)

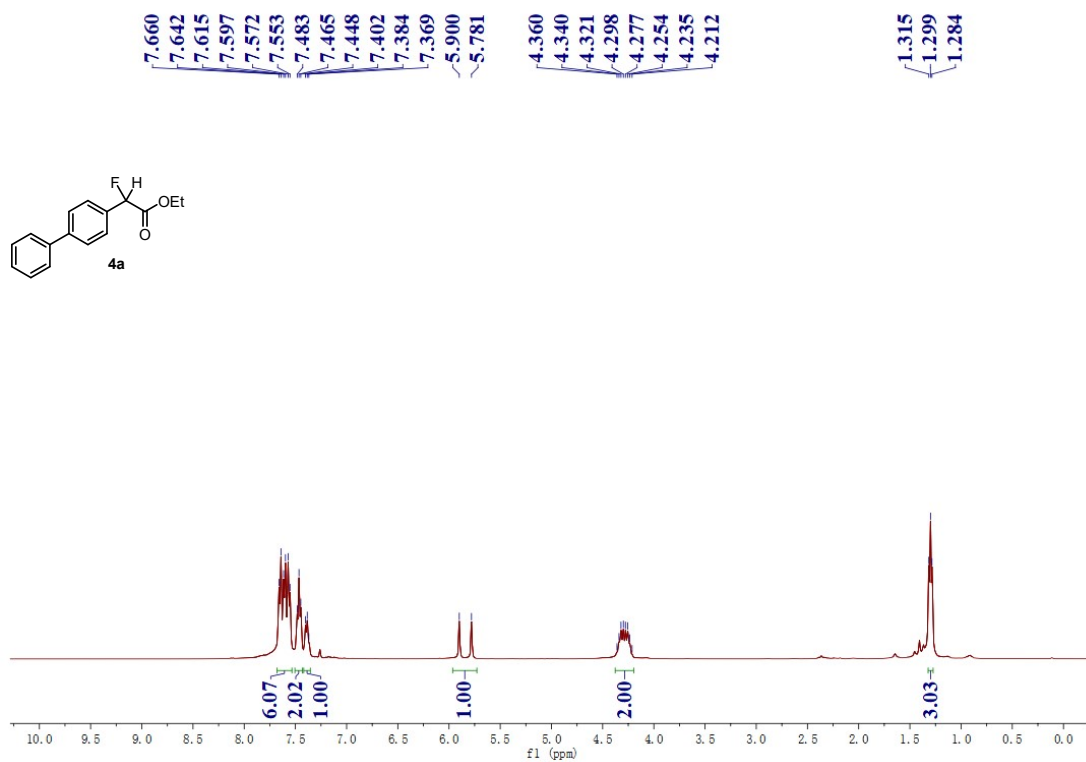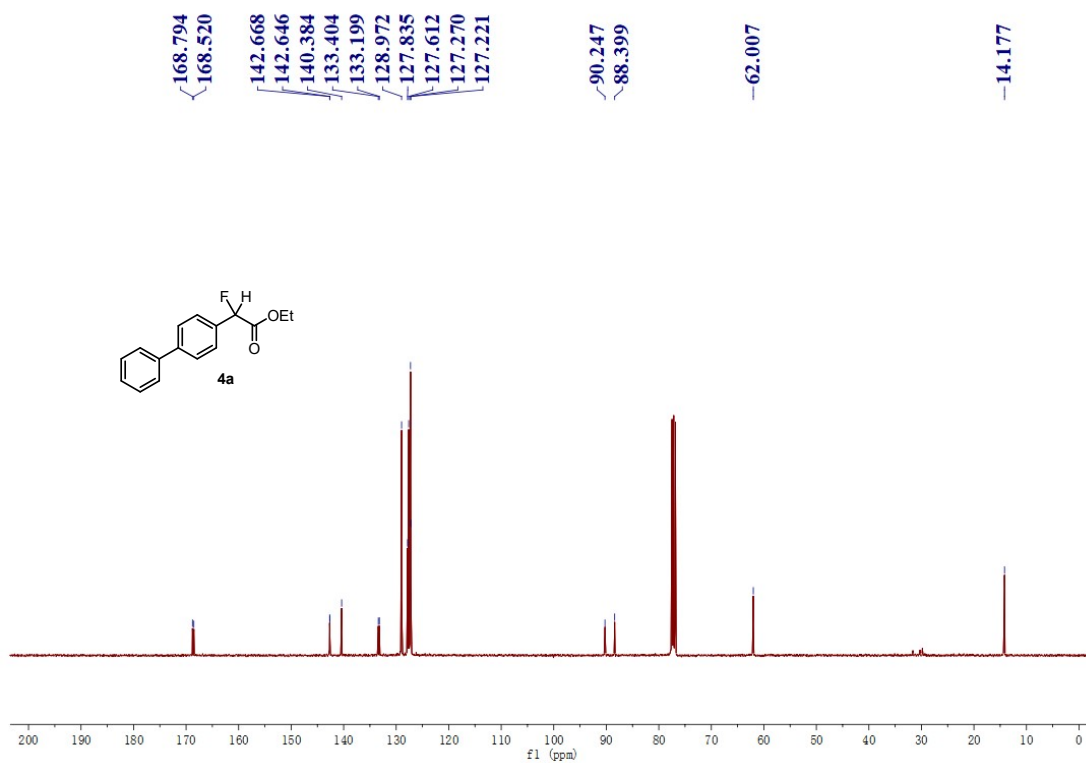

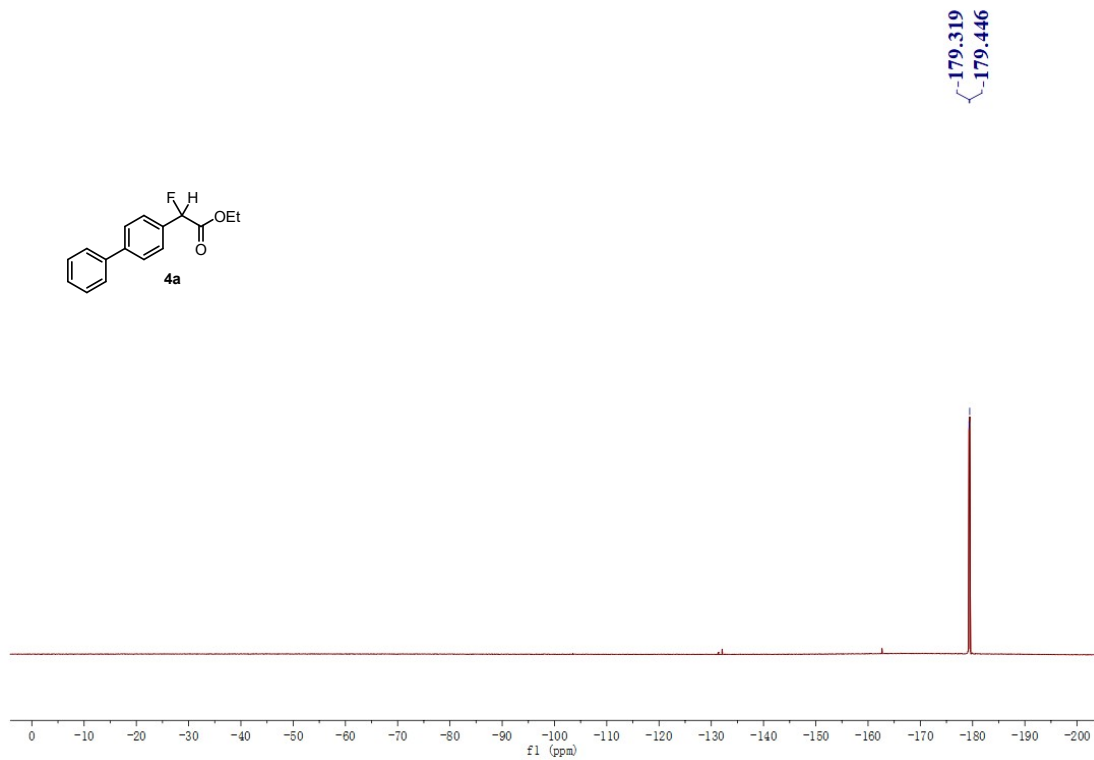

**<sup>1</sup>H and <sup>13</sup>C NMR spectra for compound 4b (Chloroform-d)**

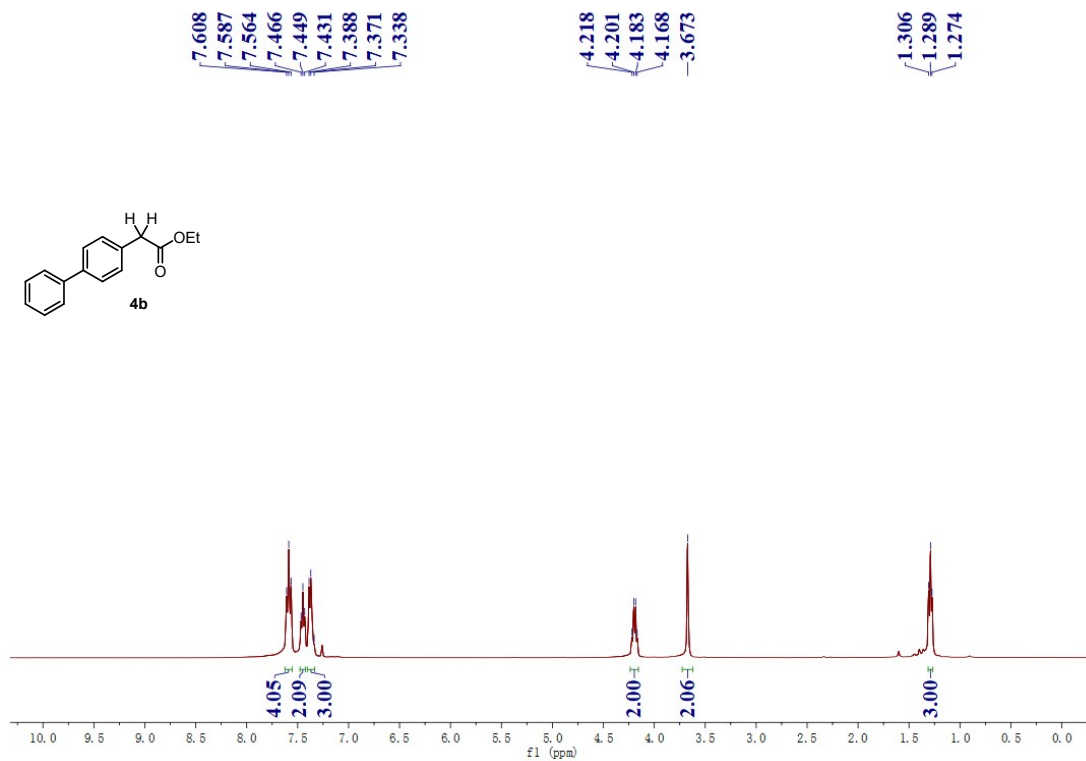

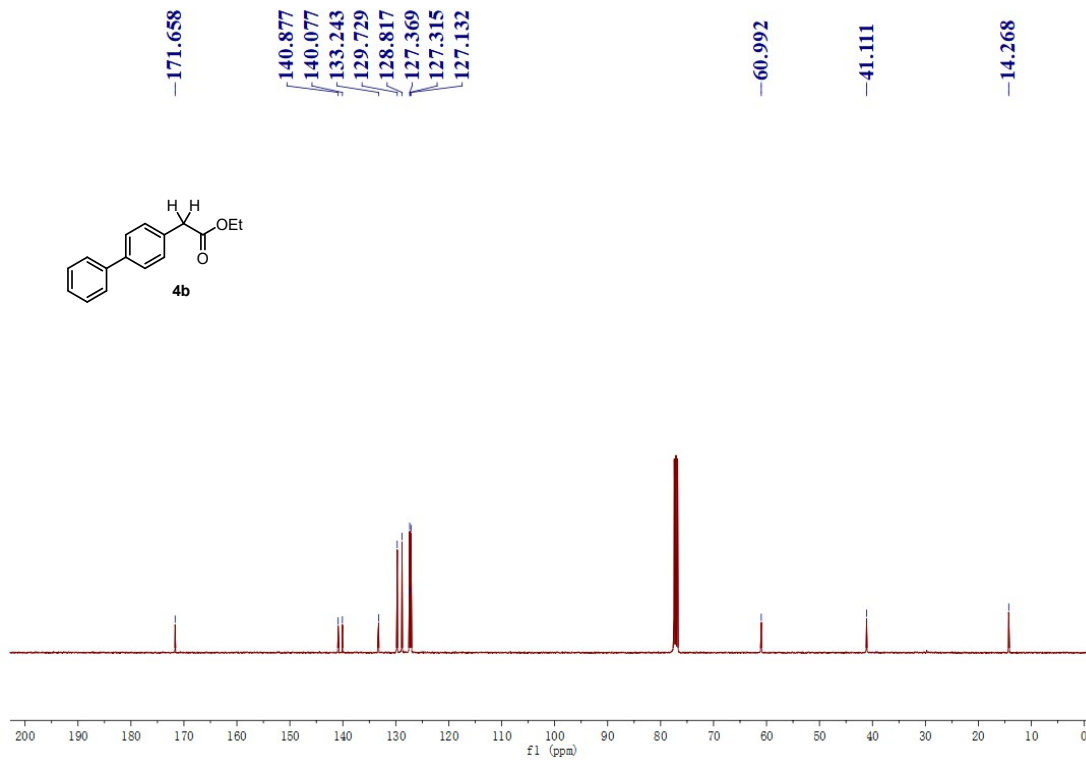

<sup>1</sup>H, <sup>13</sup>C and <sup>19</sup>F NMR spectra for compound **5a** (DMSO-d<sub>6</sub>)

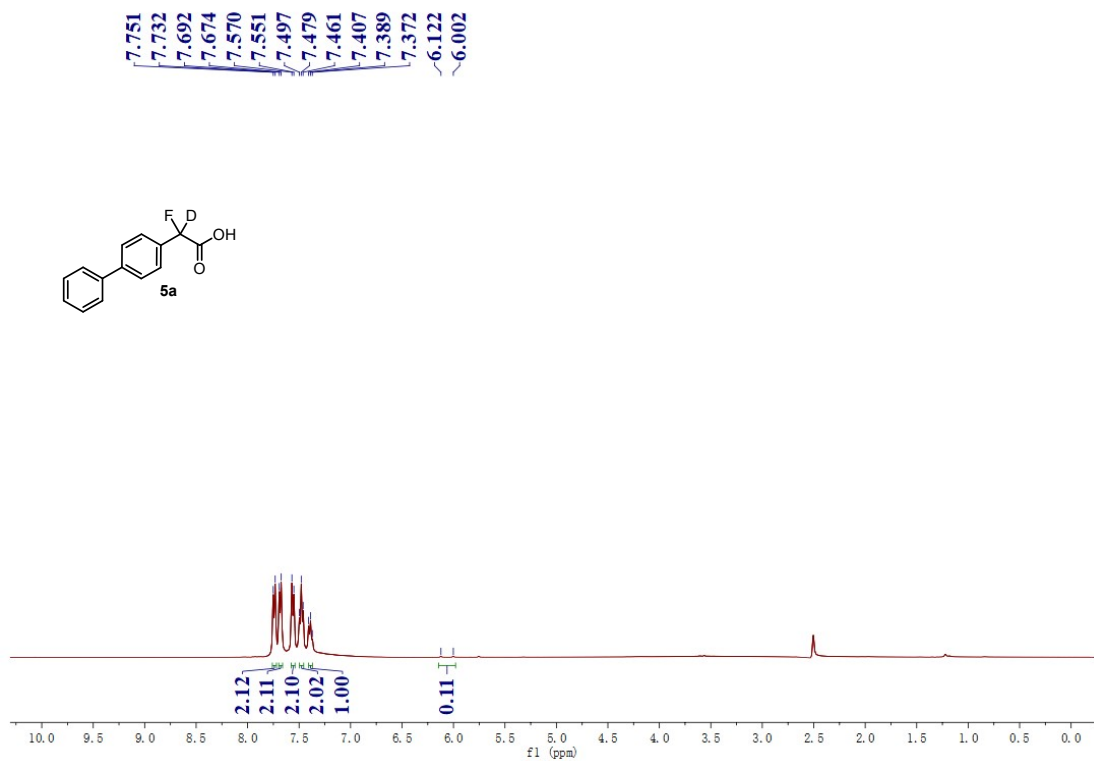

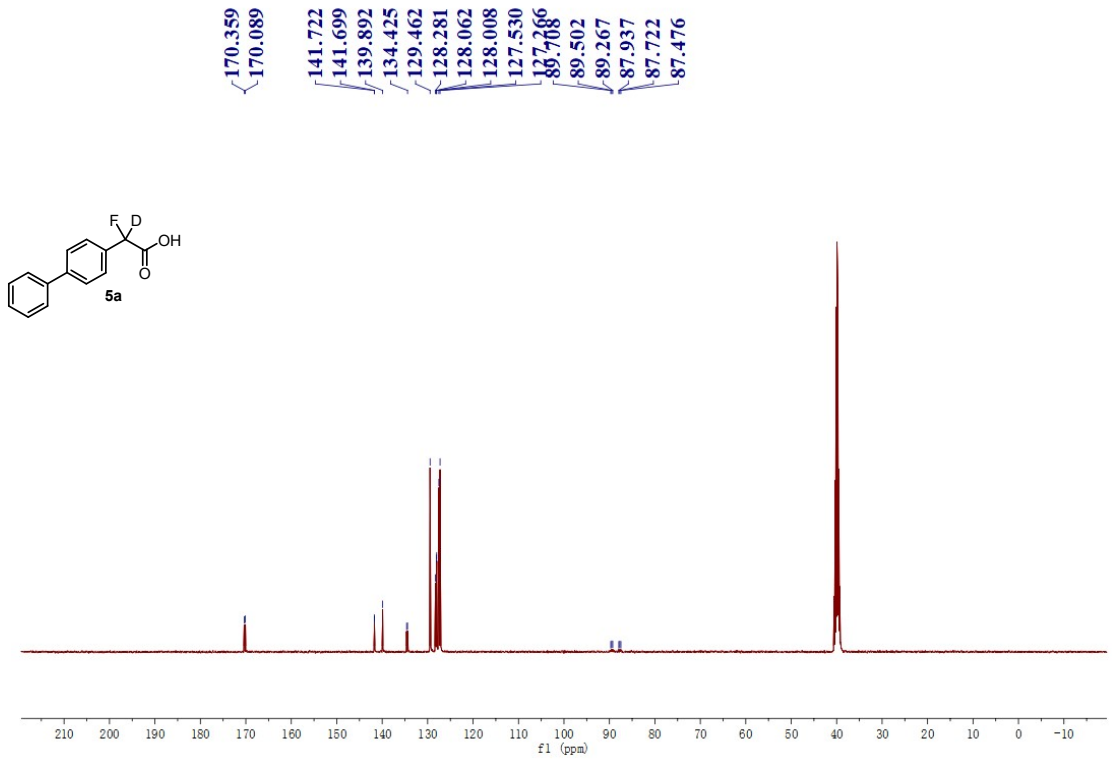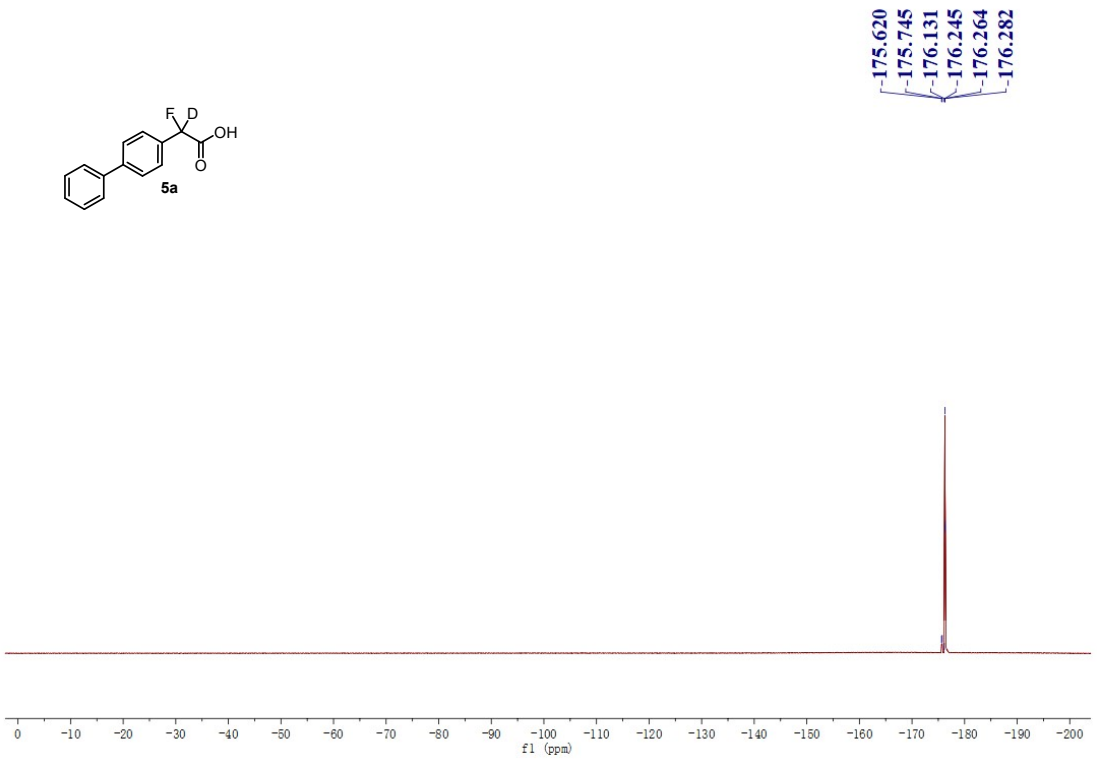

**<sup>1</sup>H and <sup>13</sup>C NMR spectra for compound 5b (DMSO-d<sub>6</sub>)**

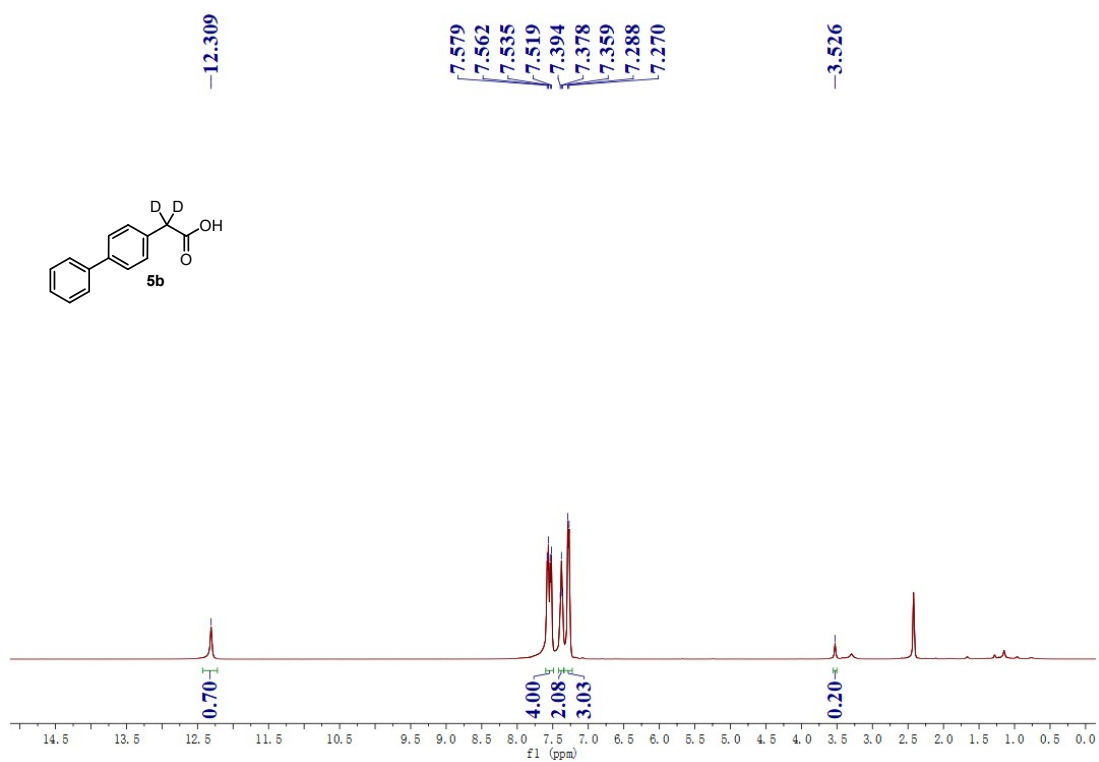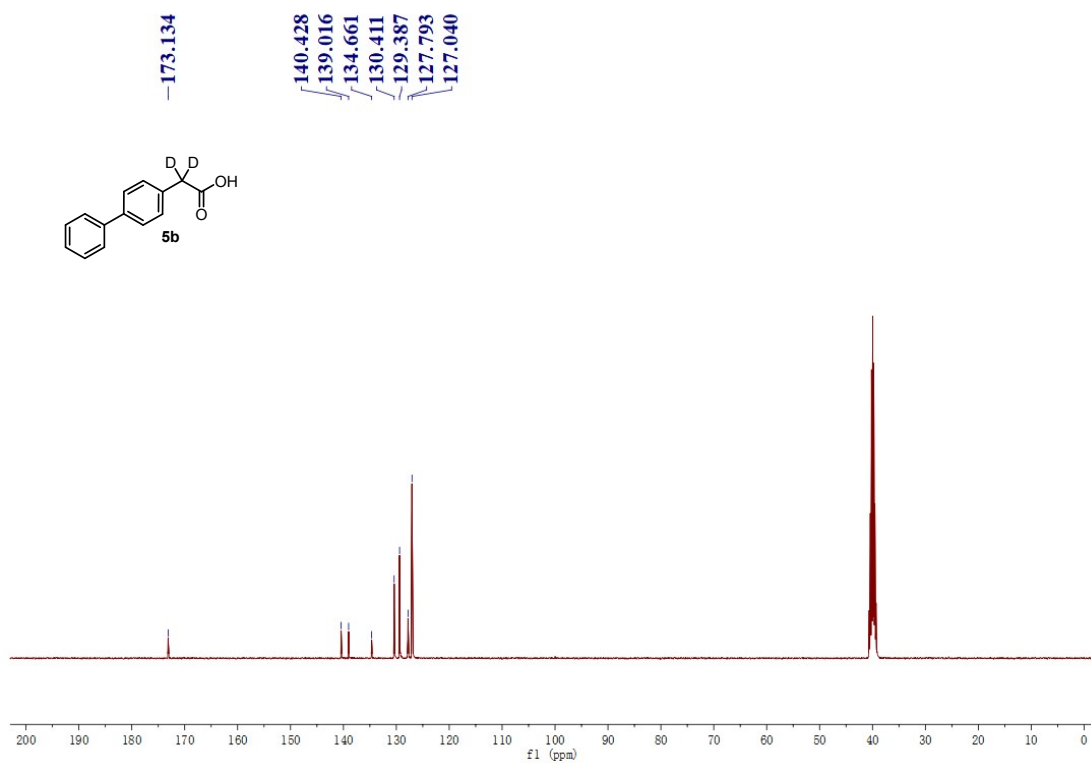

<sup>1</sup>H, <sup>13</sup>C NMR and <sup>19</sup>F spectra for compound 6 (Chloroform-d)

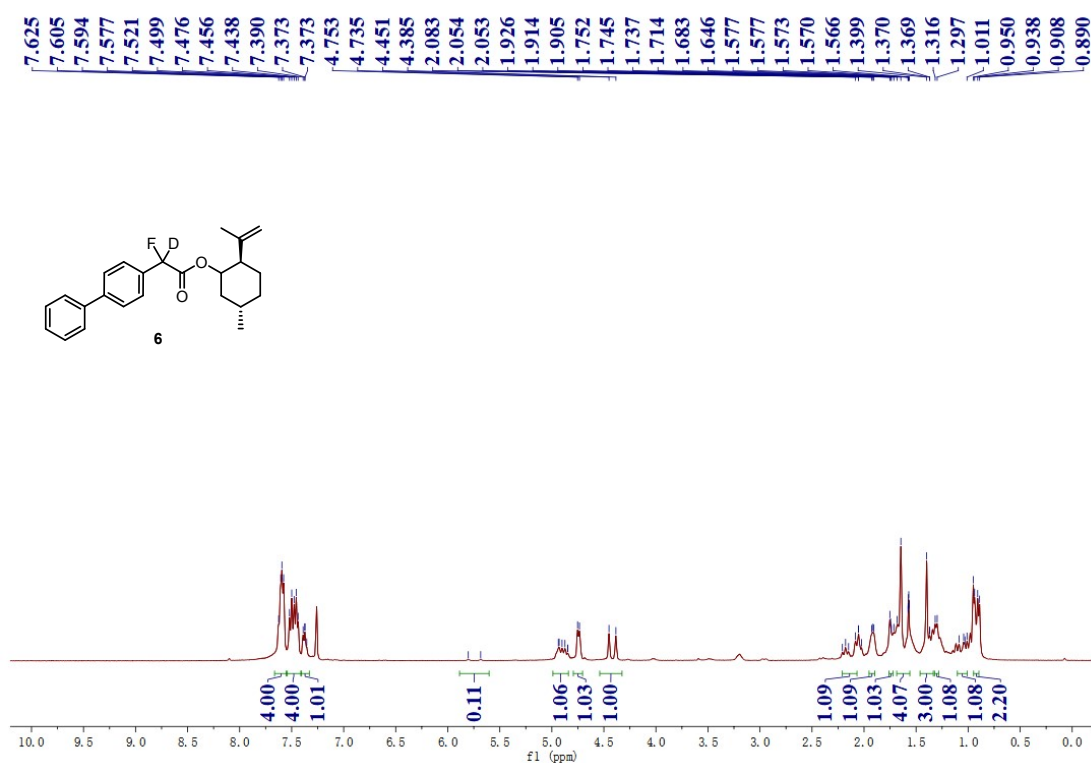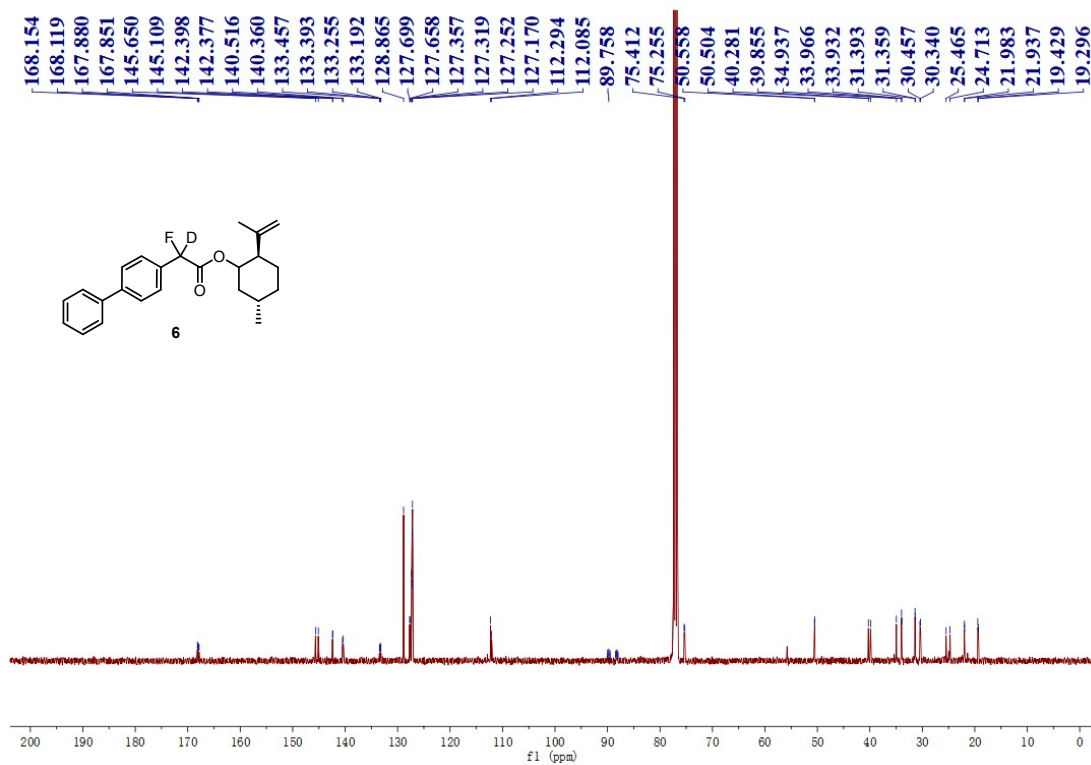

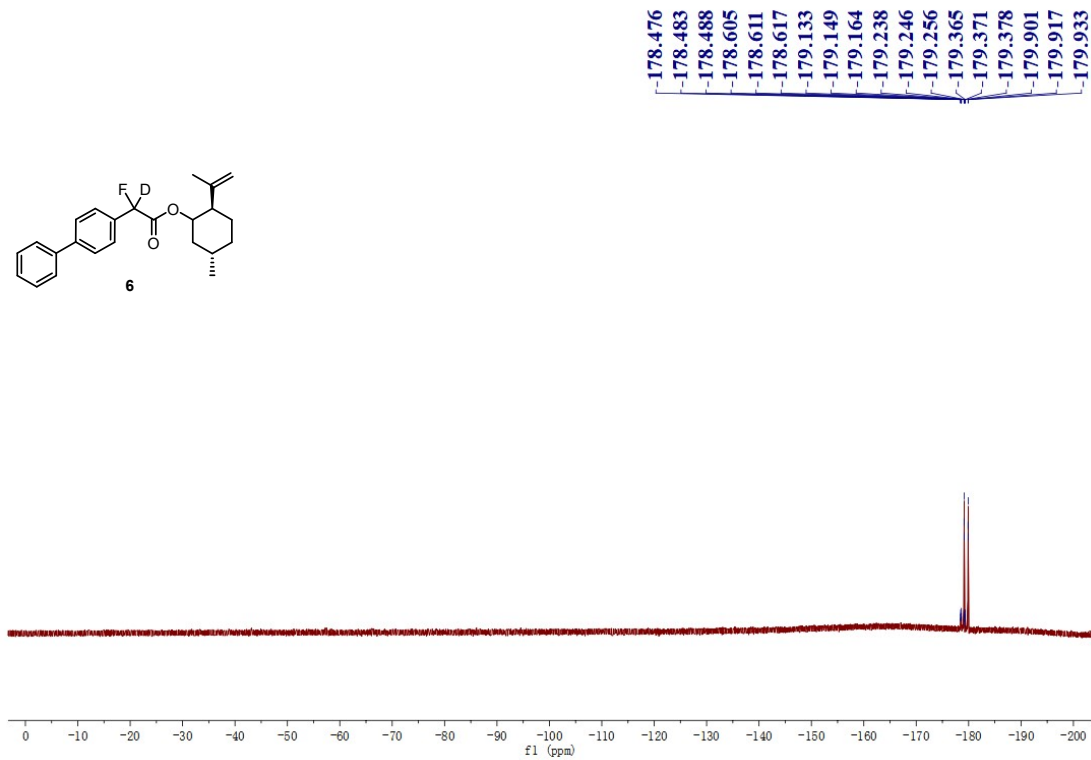

**<sup>1</sup>H, <sup>13</sup>C NMR and <sup>19</sup>F spectra for compound 5a (Chloroform-d)**

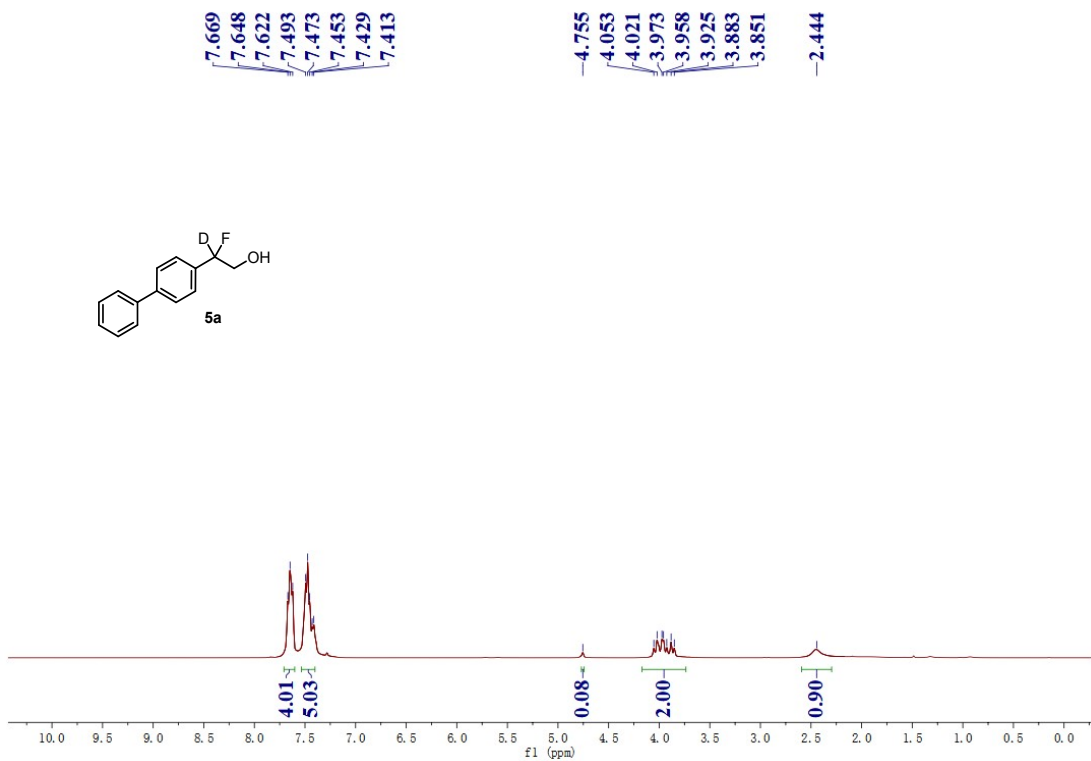

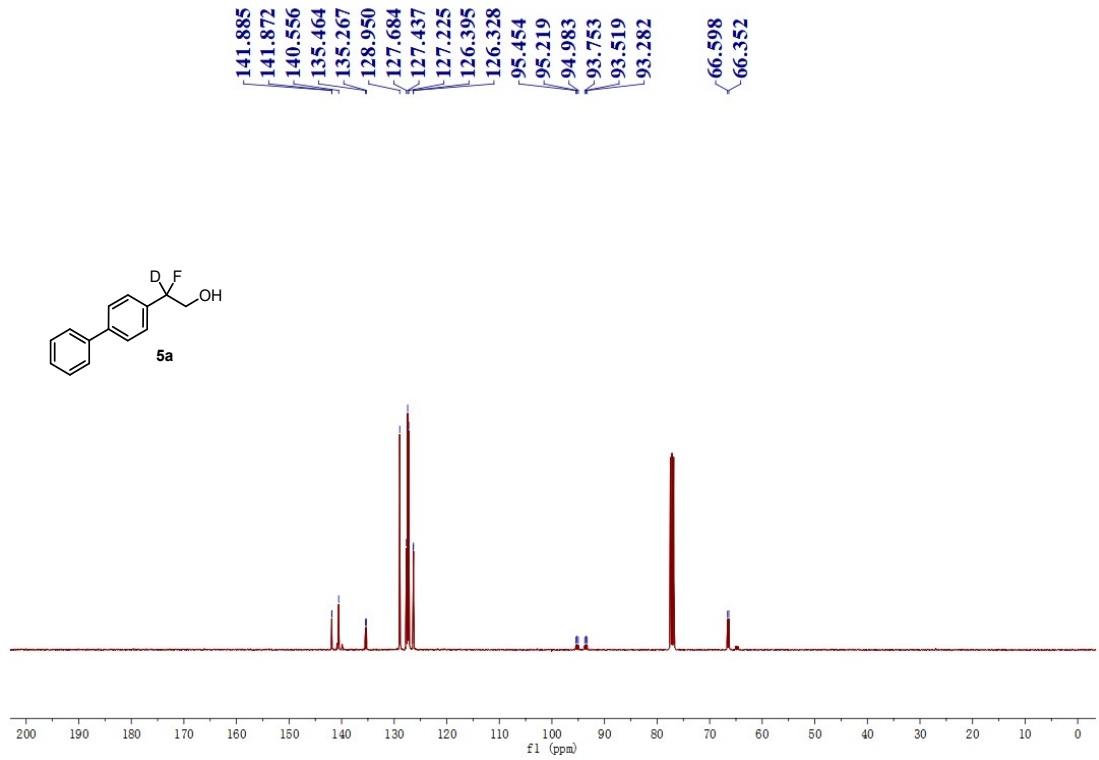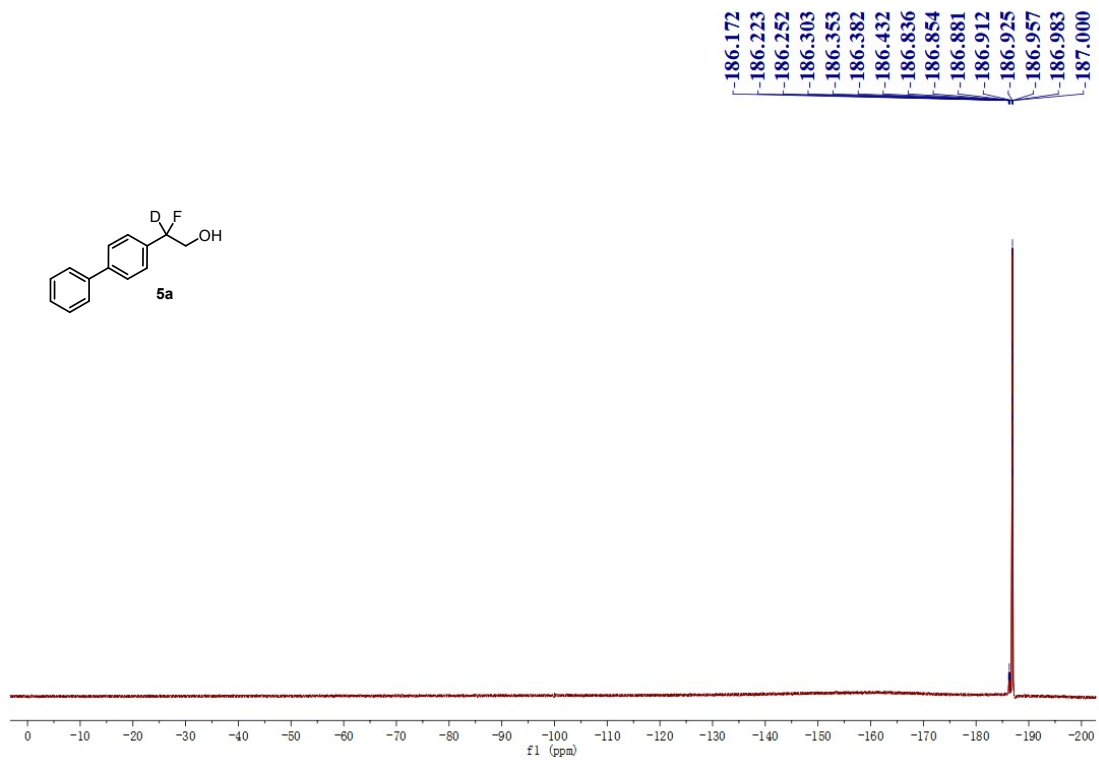



<sup>1</sup>H, <sup>13</sup>C NMR and <sup>19</sup>F spectra for compound 5b (Chloroform-d)

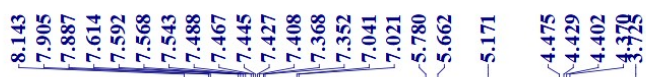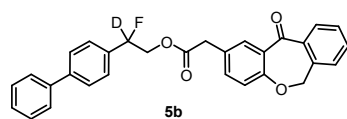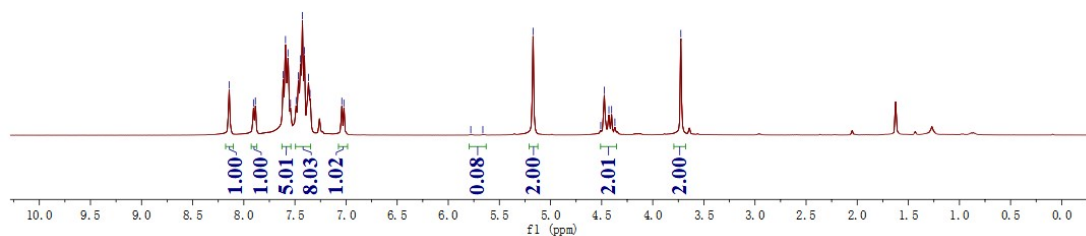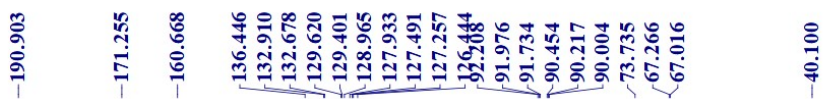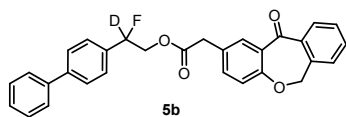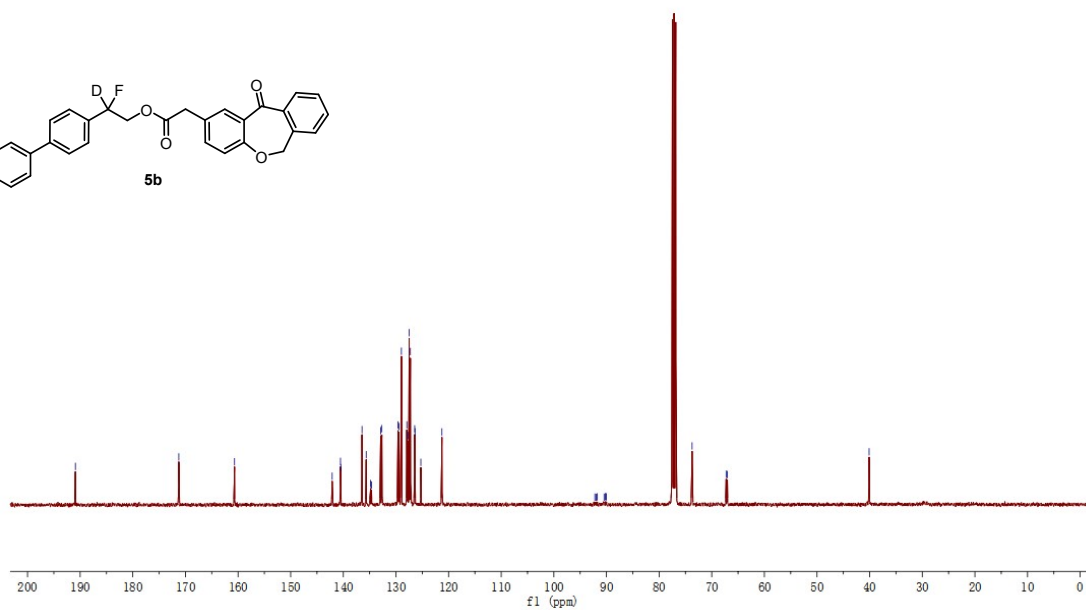

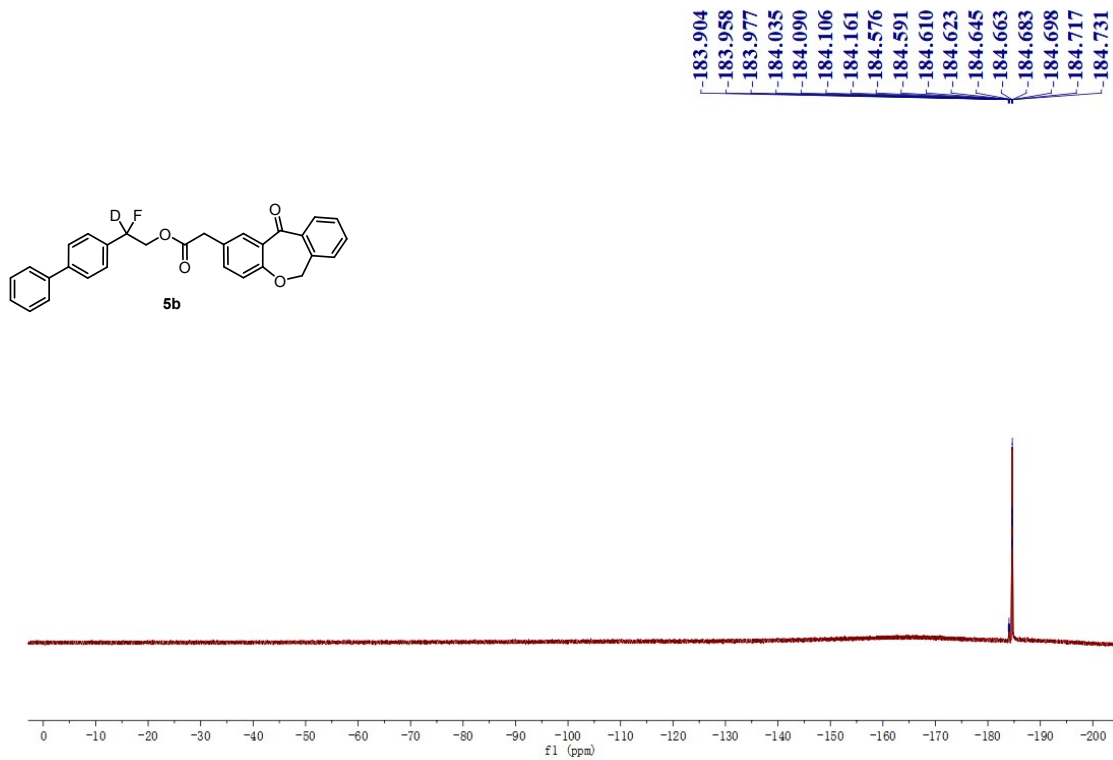

## 11.2 $^1\text{H}$ NMR, $^{13}\text{C}$ NMR and $^{19}\text{F}$ NMR Spectra of material 1

$^1\text{H}$ ,  $^{13}\text{C}$  NMR and  $^{19}\text{F}$  spectra for compound **1b** (Chloroform-d)

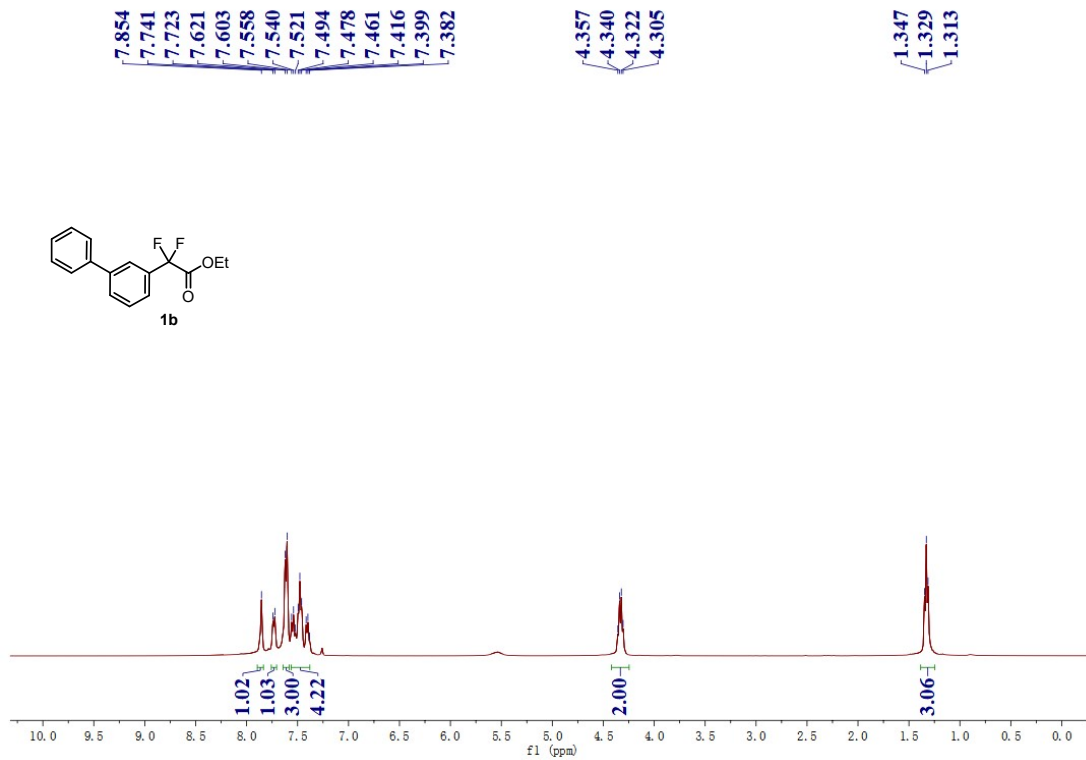

164.747  
 164.396  
 164.045  
 141.962  
 140.126  
 133.767  
 133.514  
 133.261  
 129.848  
 129.279  
 129.070  
 128.022  
 127.326  
 124.435  
 124.375  
 124.318  
 116.045  
 113.540  
 111.030

63.368

14.022

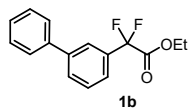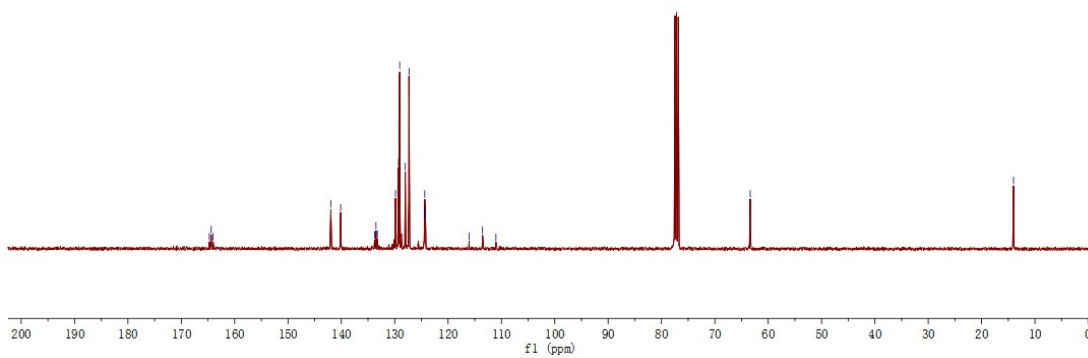

103.716

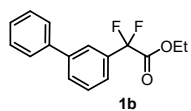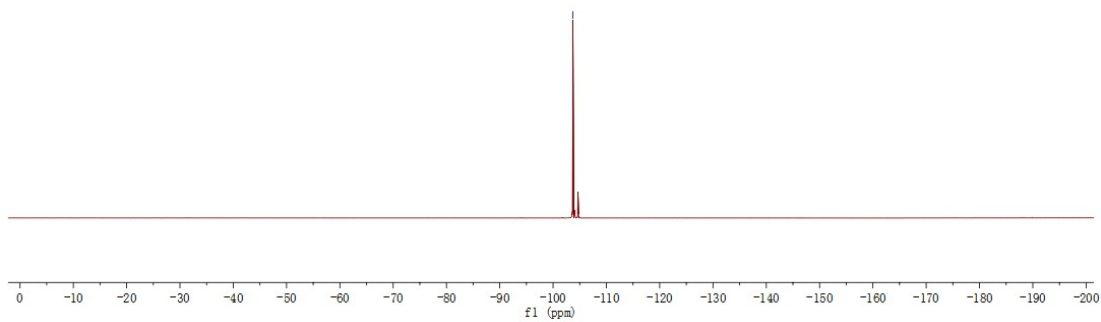

<sup>1</sup>H, <sup>13</sup>C NMR and <sup>19</sup>F spectra for compound 1c (Chloroform-d)

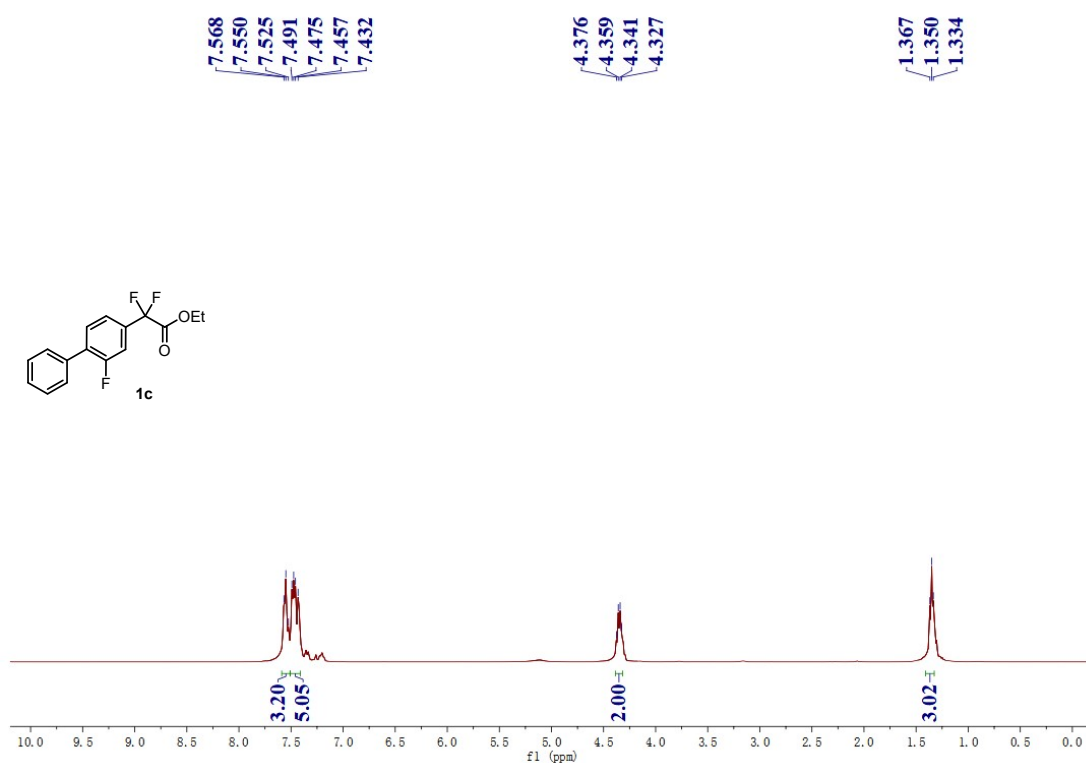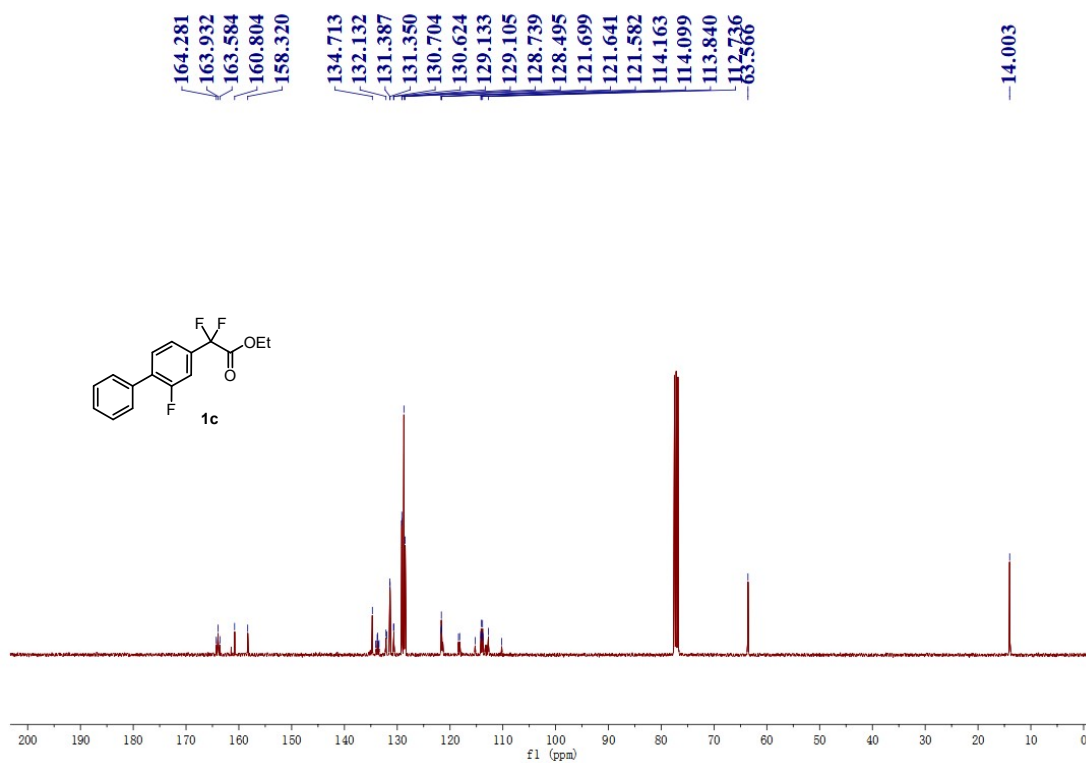

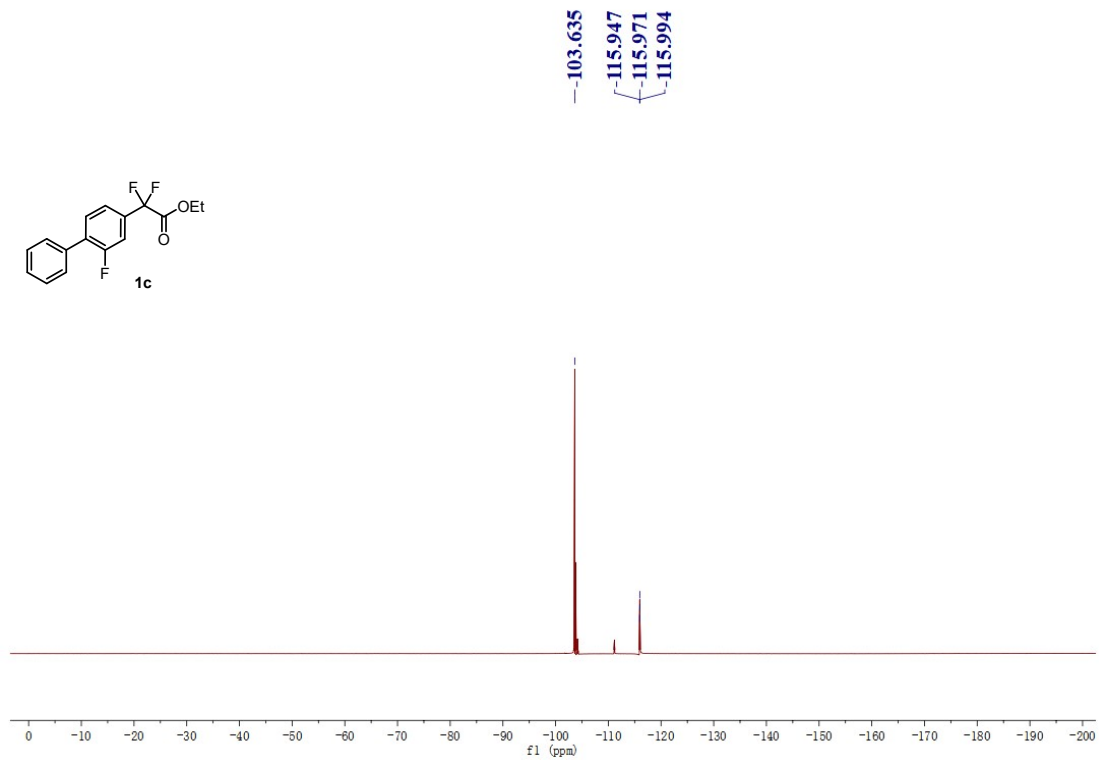

**$^1\text{H}$ ,  $^{13}\text{C}$  NMR and  $^{19}\text{F}$  spectra for compound 1d (Chloroform-d)**

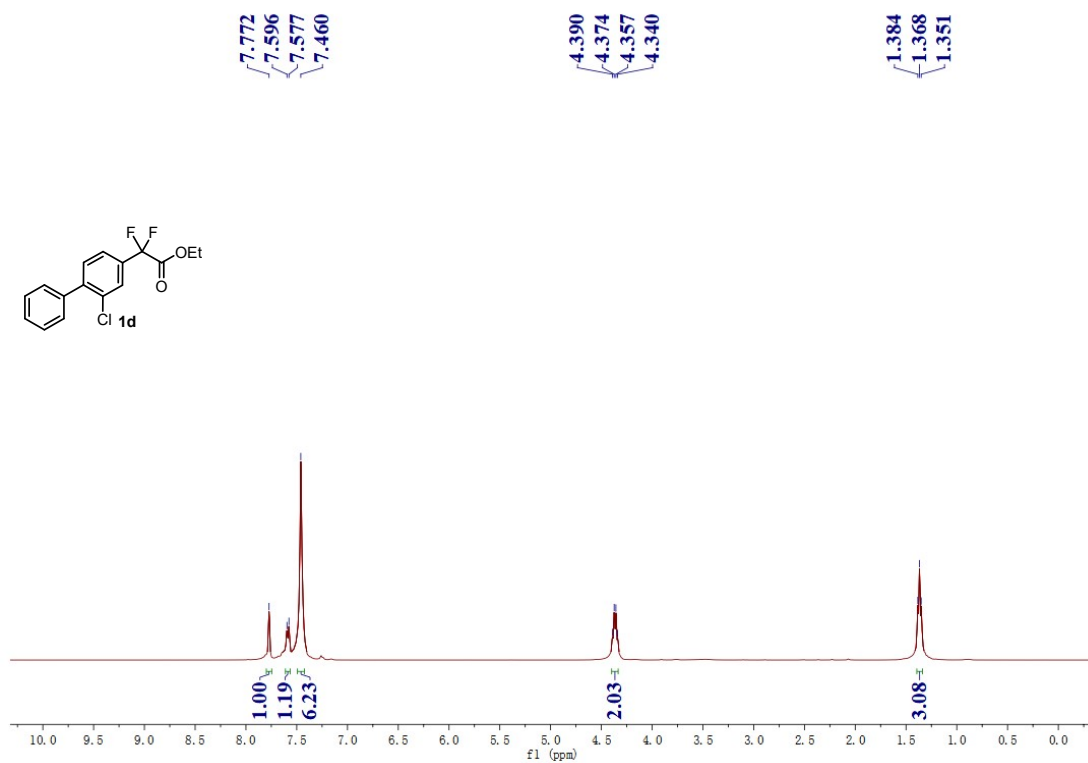

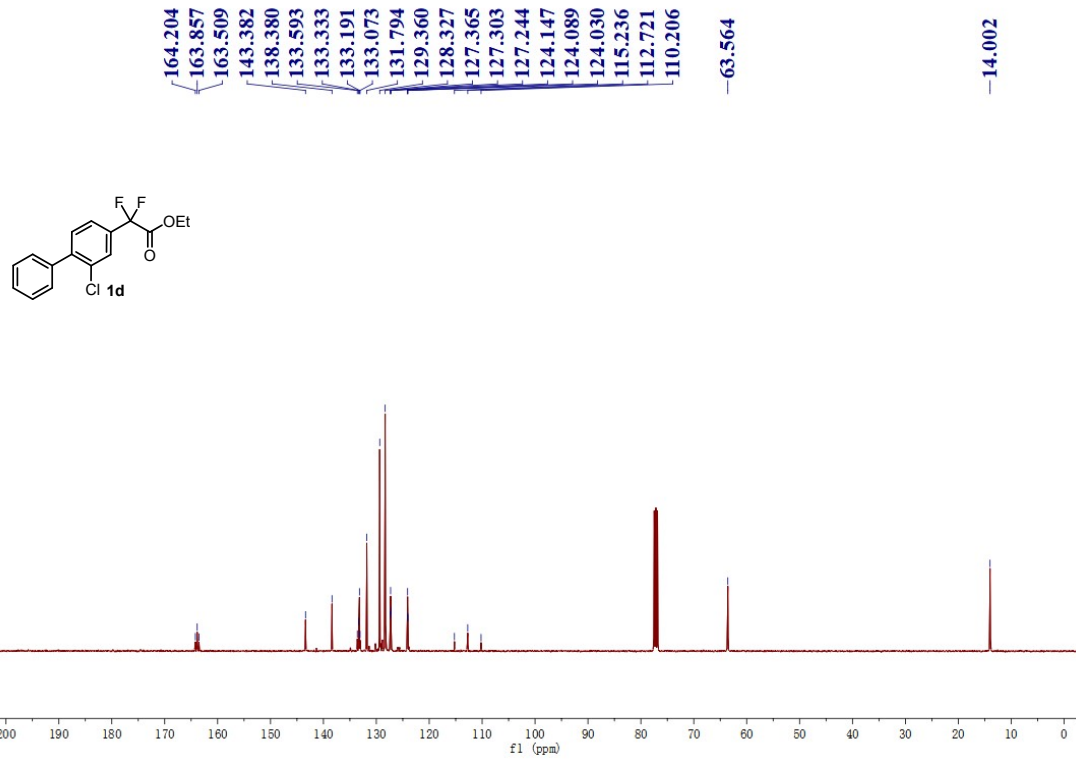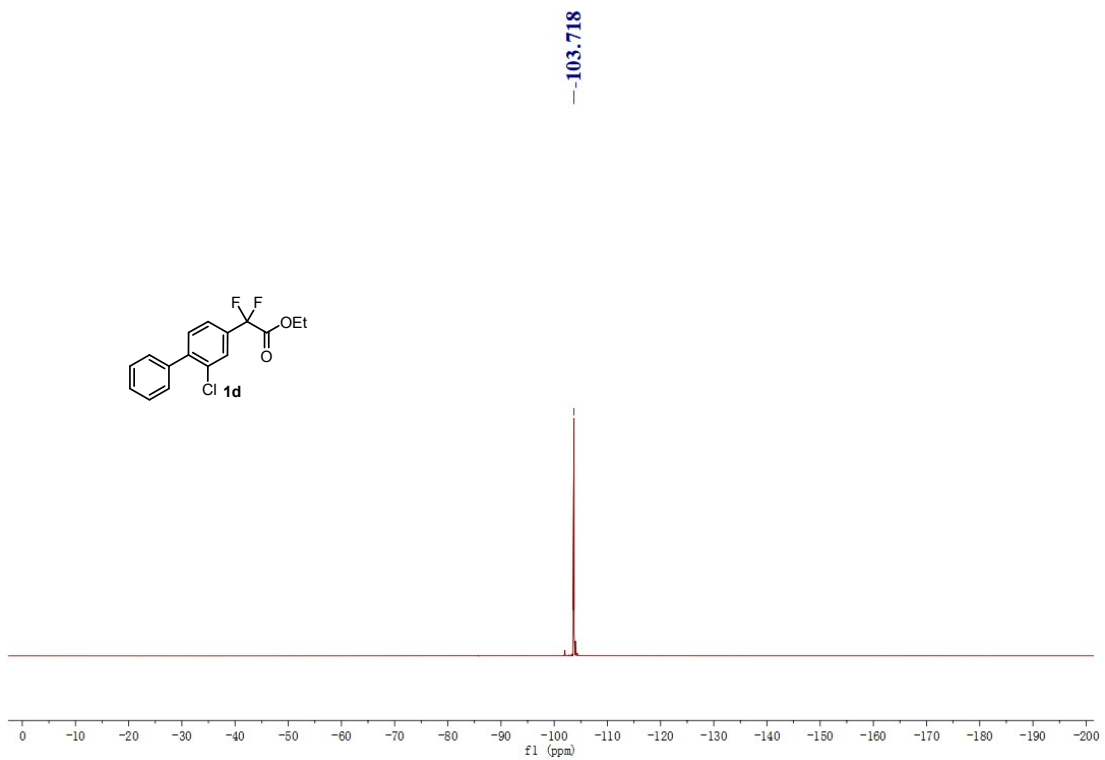

<sup>1</sup>H, <sup>13</sup>C NMR and <sup>19</sup>F spectra for compound 1e (Chloroform-d)

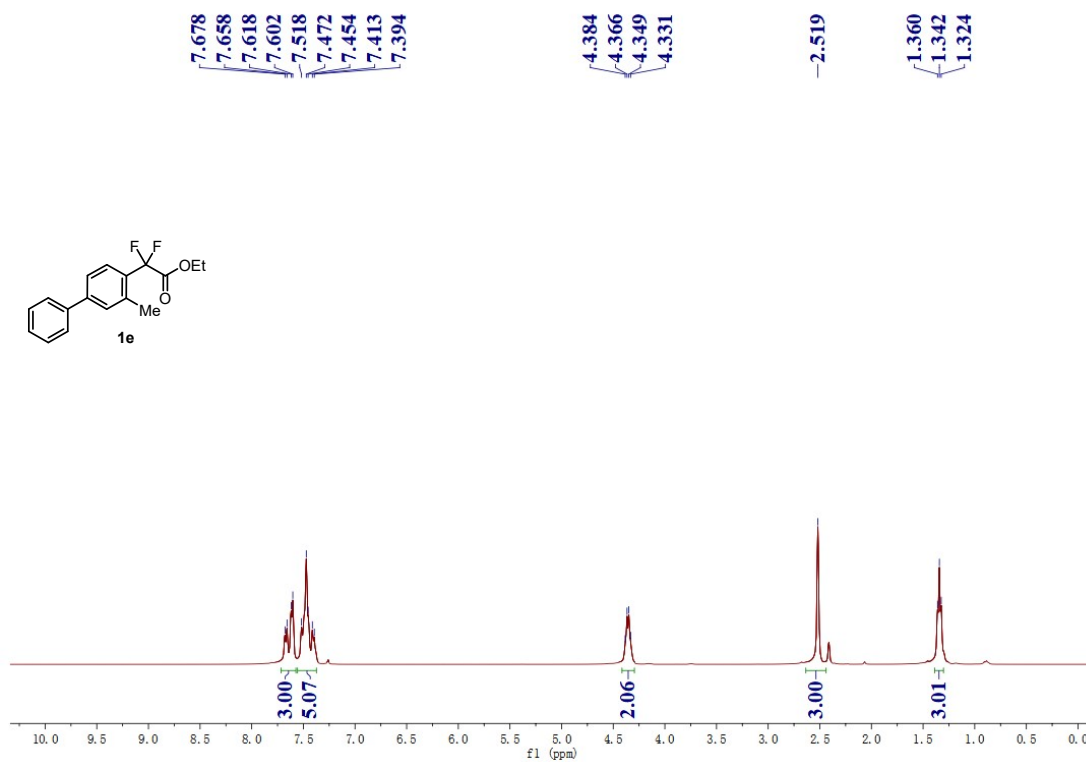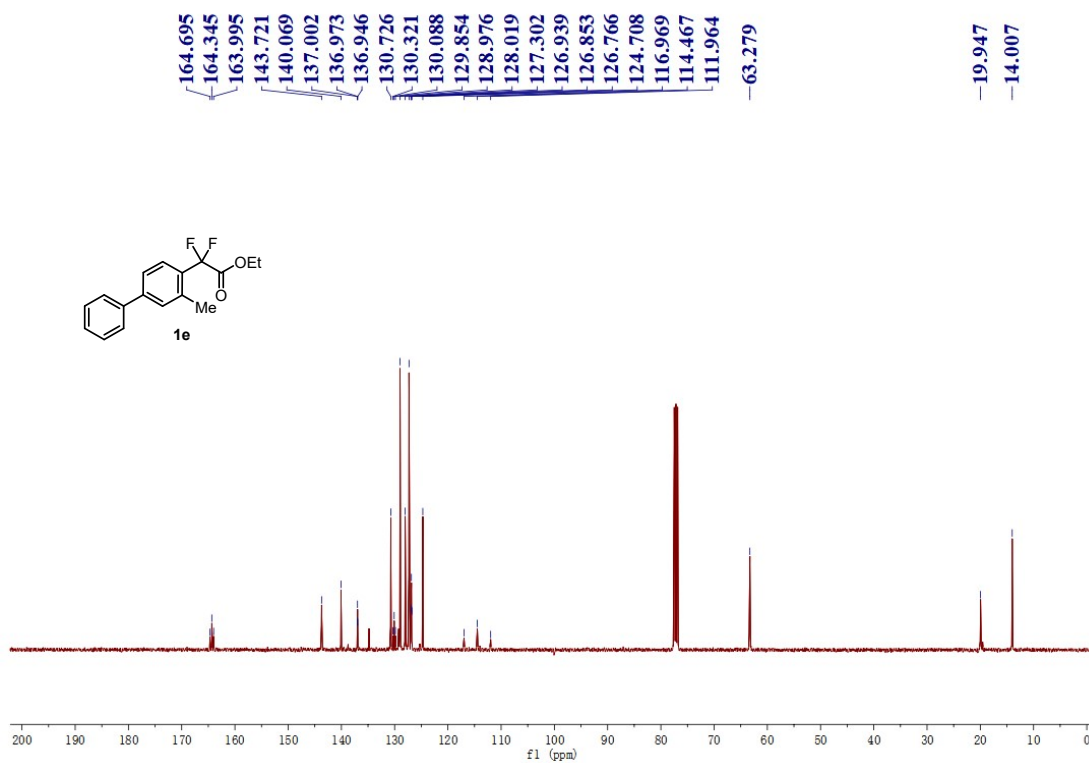

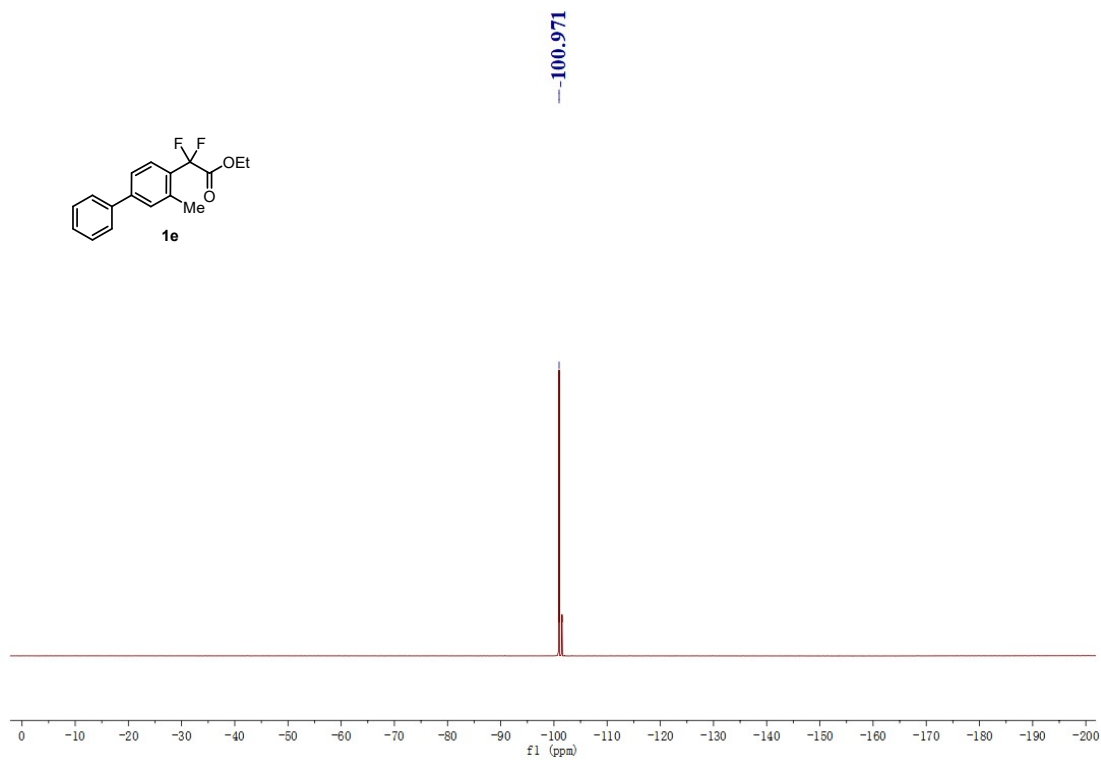

**$^1\text{H}$ ,  $^{13}\text{C}$  NMR and  $^{19}\text{F}$  spectra for compound **1f** (Chloroform-d)**

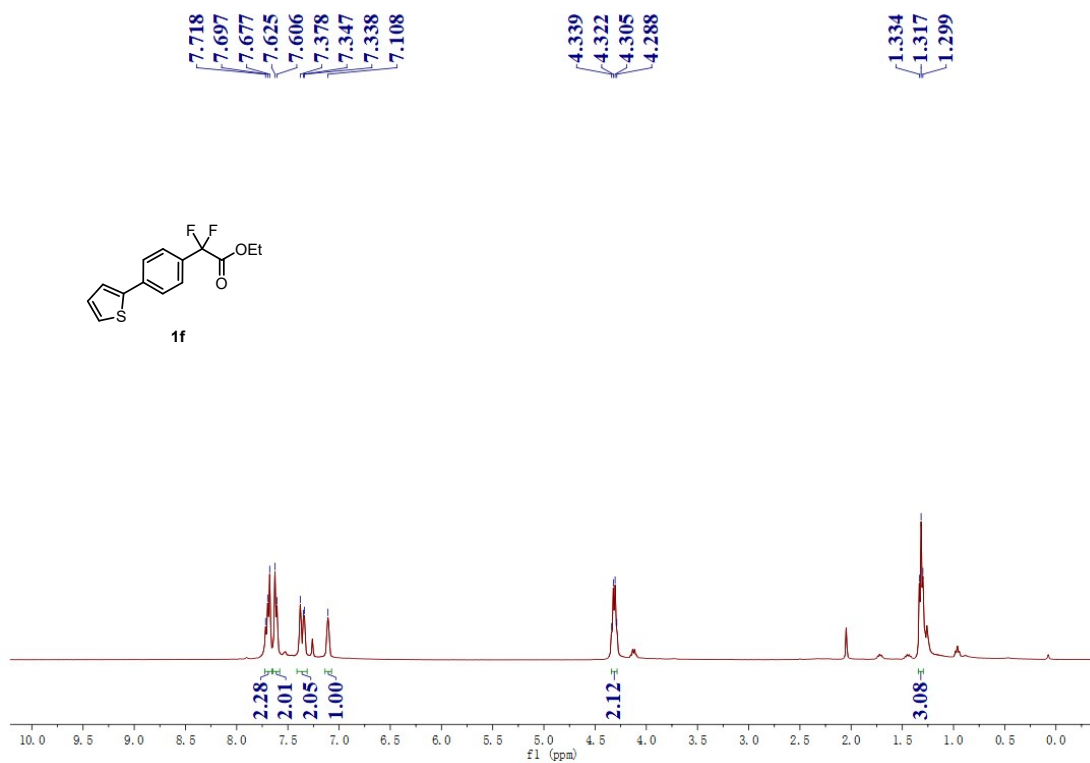



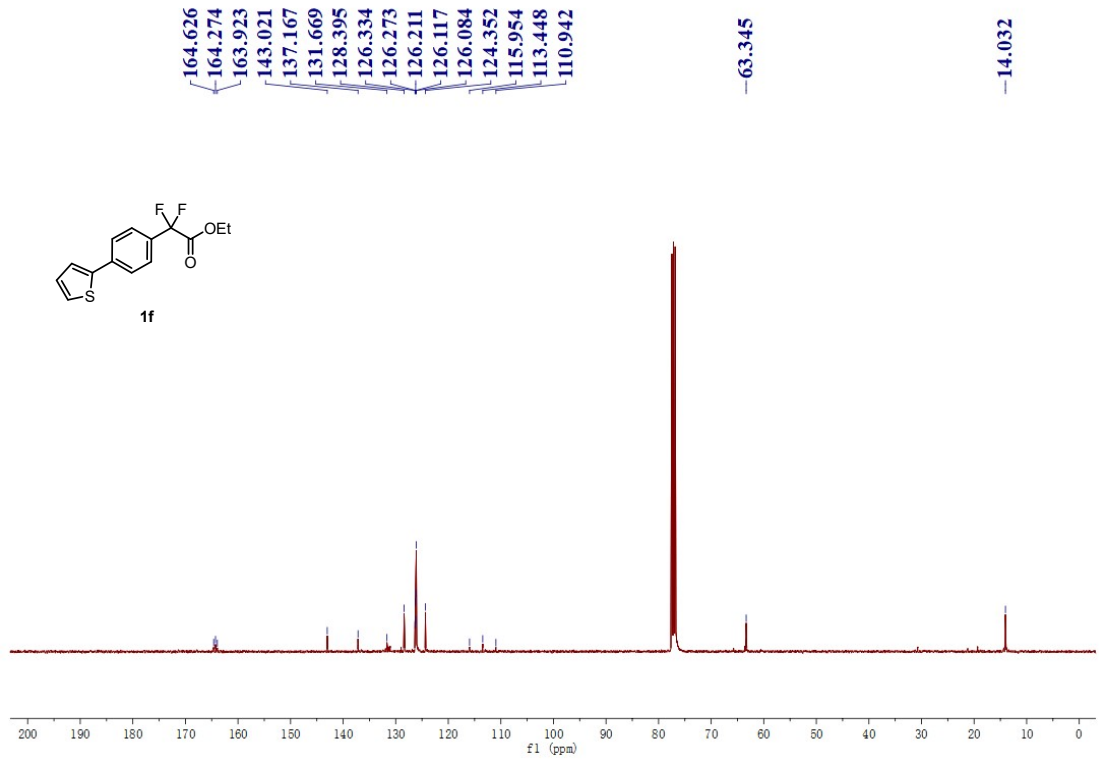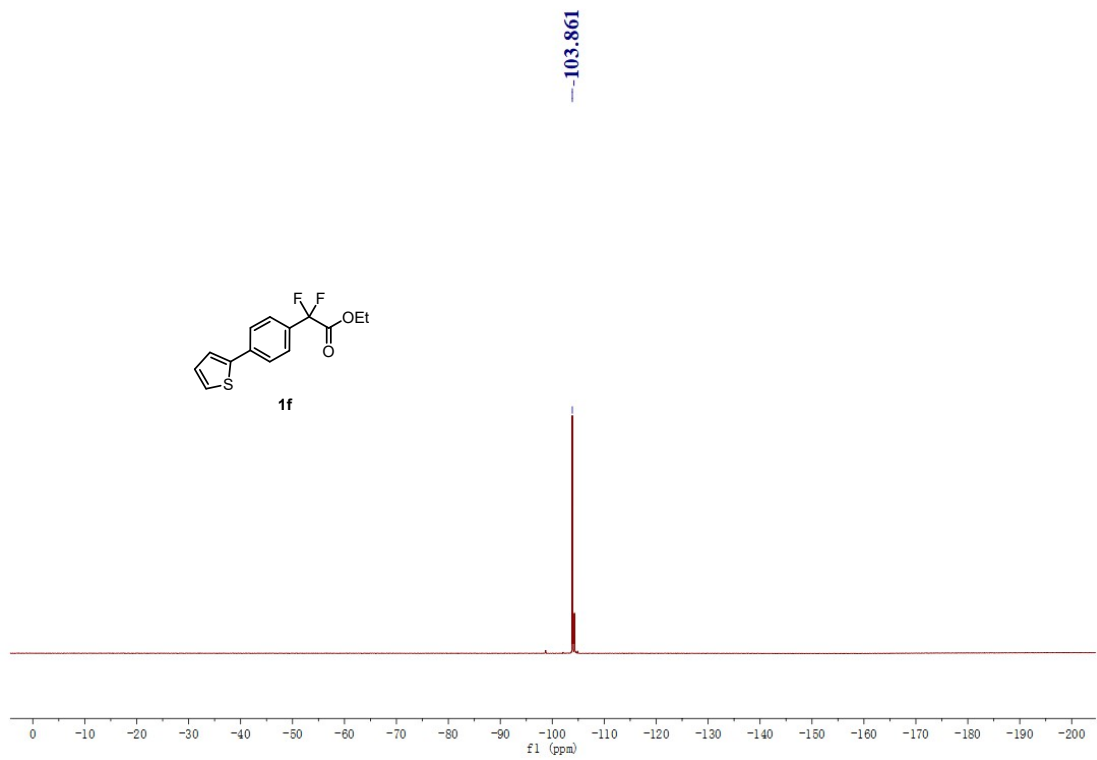

<sup>1</sup>H, <sup>13</sup>C NMR and <sup>19</sup>F spectra for compound 1g (Chloroform-d)

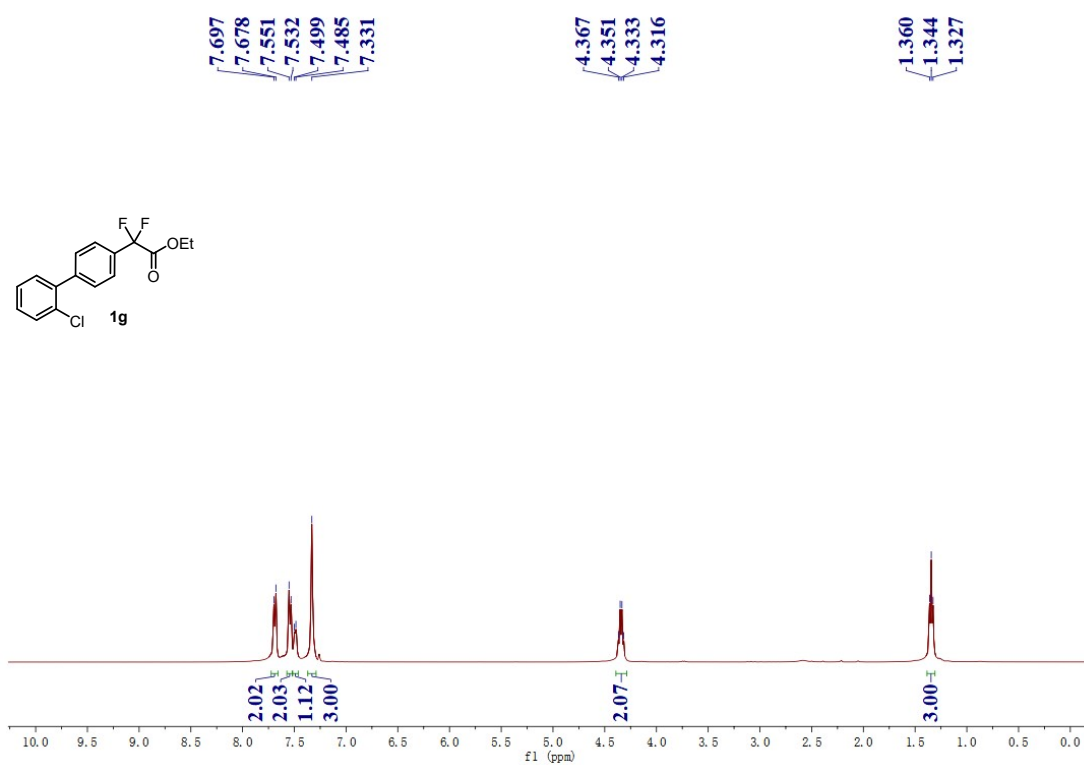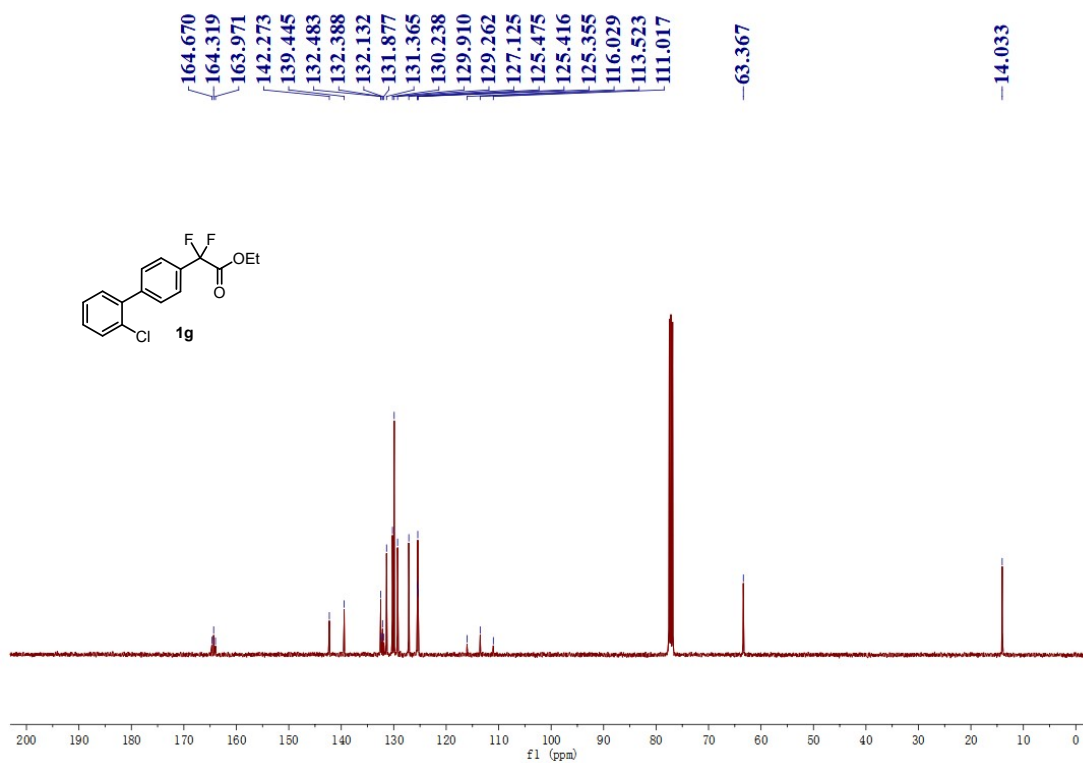

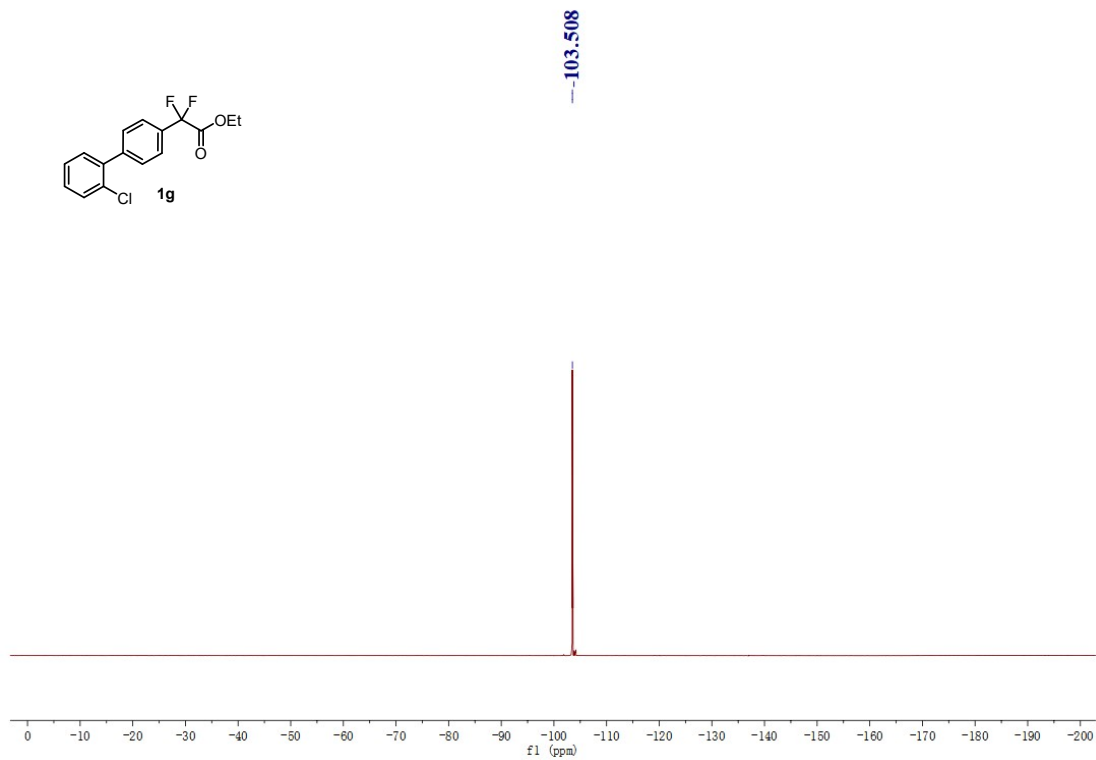

**<sup>1</sup>H, <sup>13</sup>C NMR and <sup>19</sup>F spectra for compound 1h (Chloroform-d)**

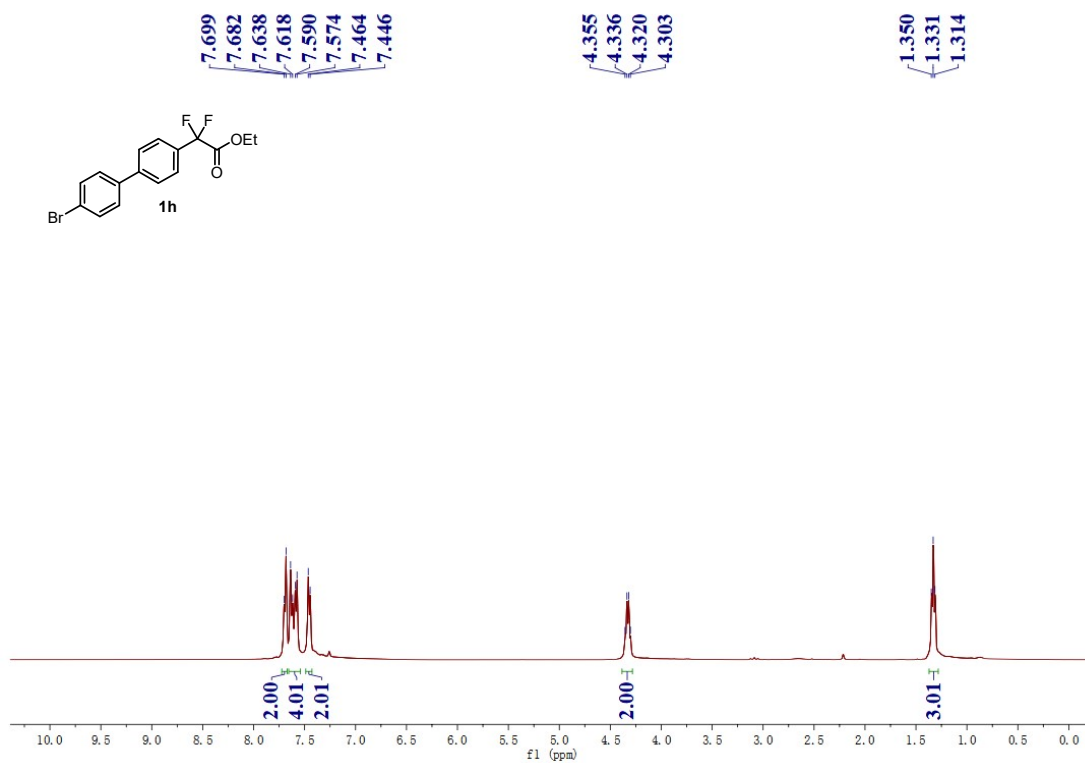

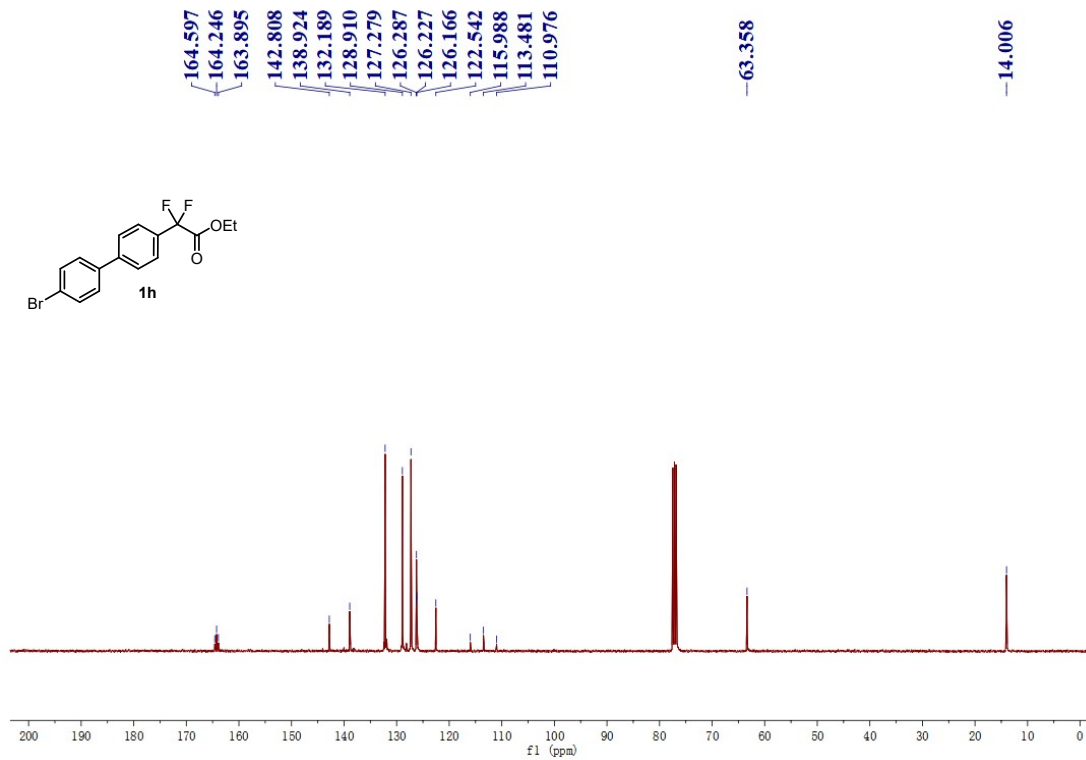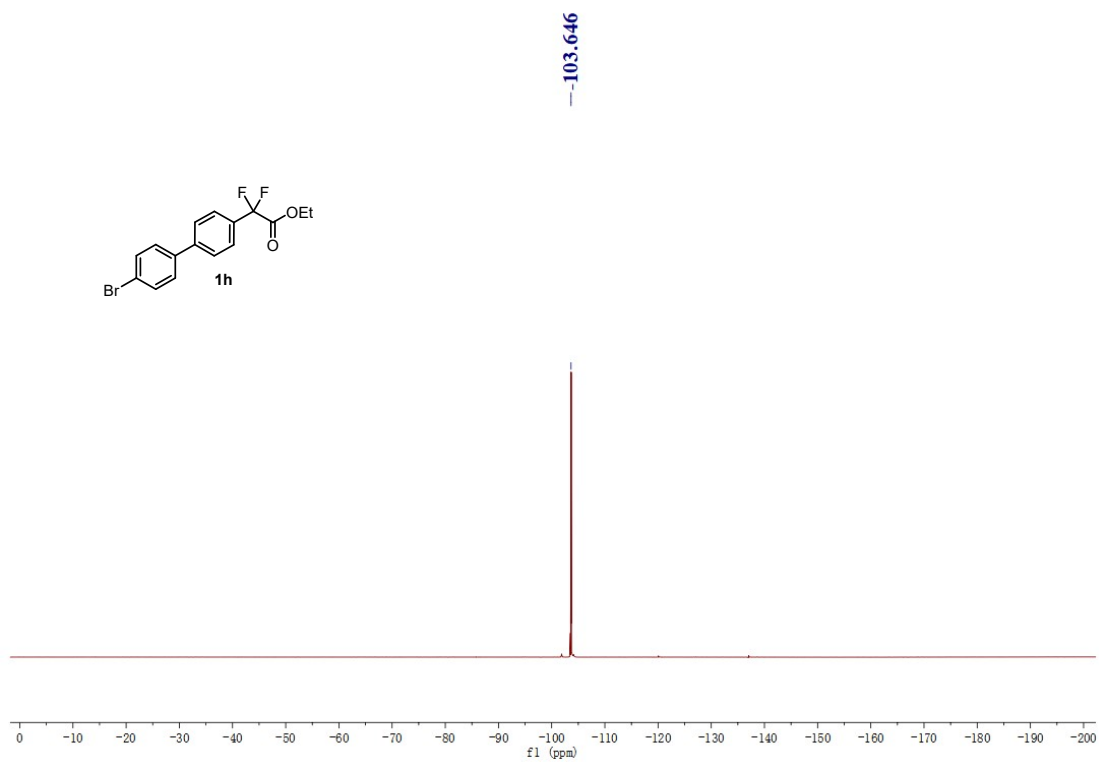

<sup>1</sup>H, <sup>13</sup>C NMR and <sup>19</sup>F spectra for compound 1i (Chloroform-d)

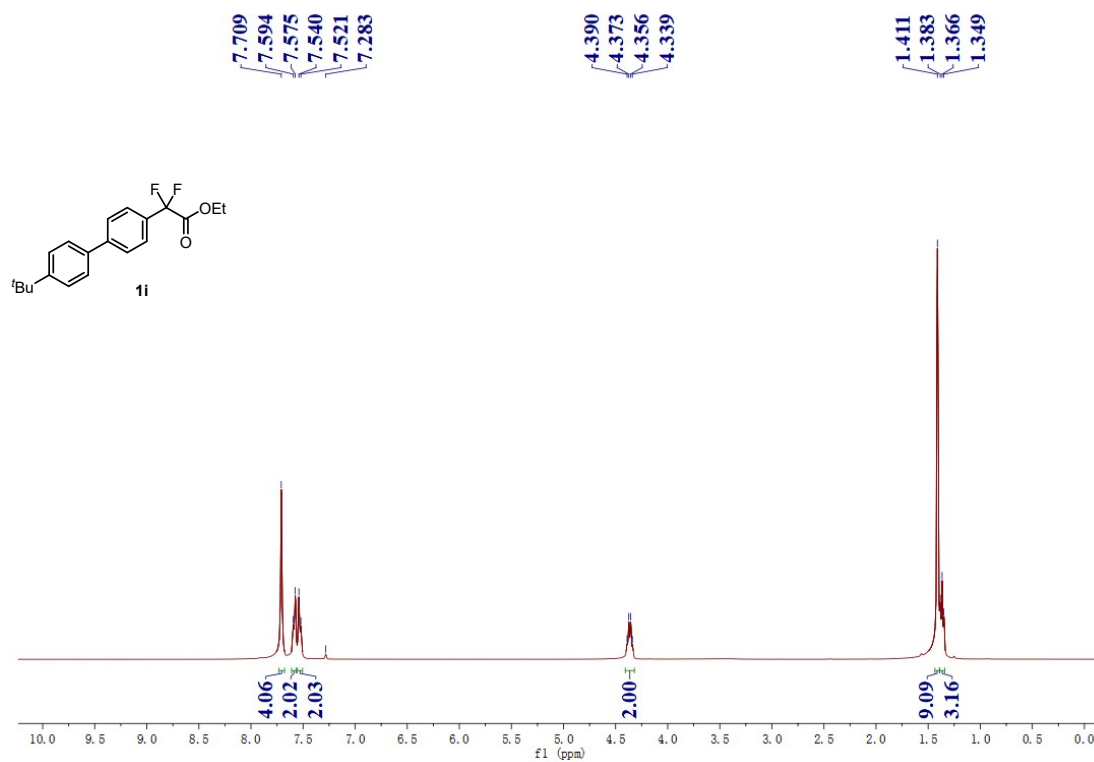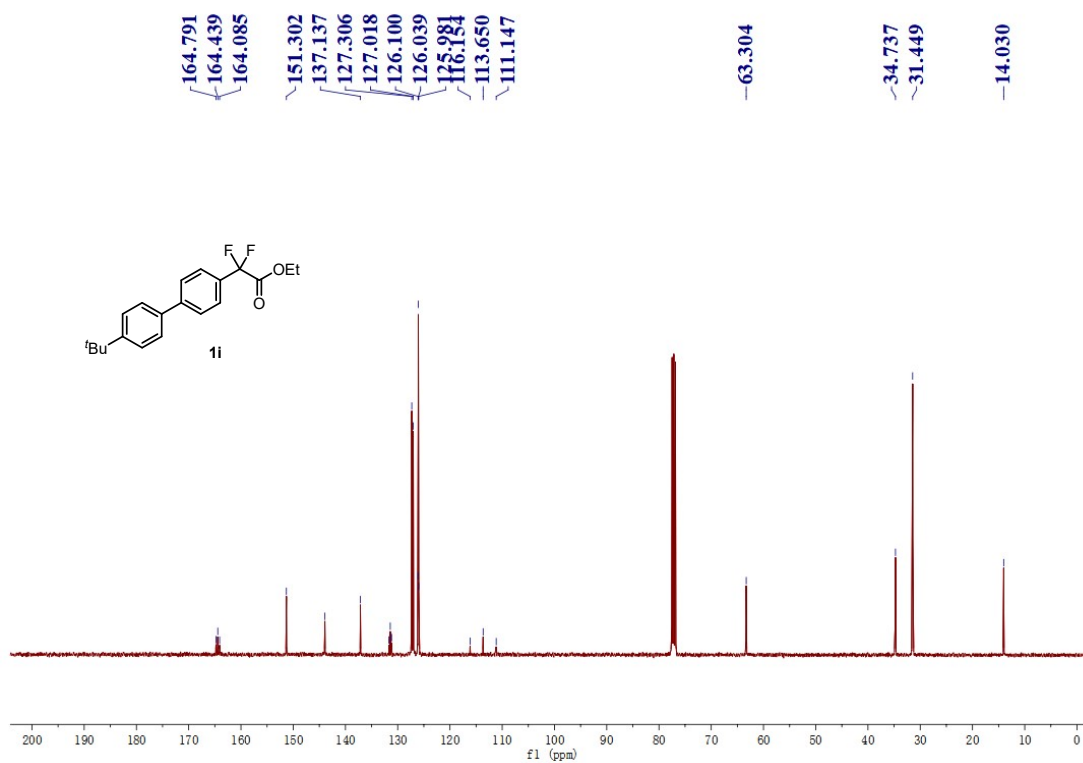

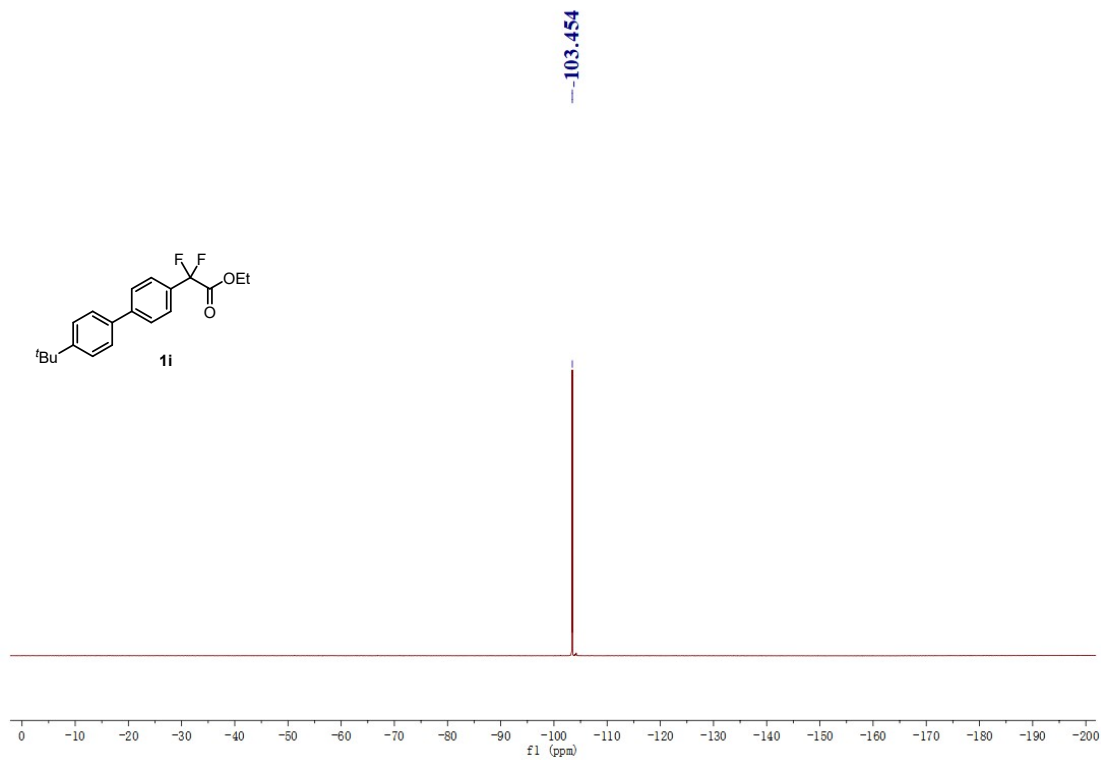

<sup>1</sup>H, <sup>13</sup>C NMR and <sup>19</sup>F spectra for compound 1j (Chloroform-d)

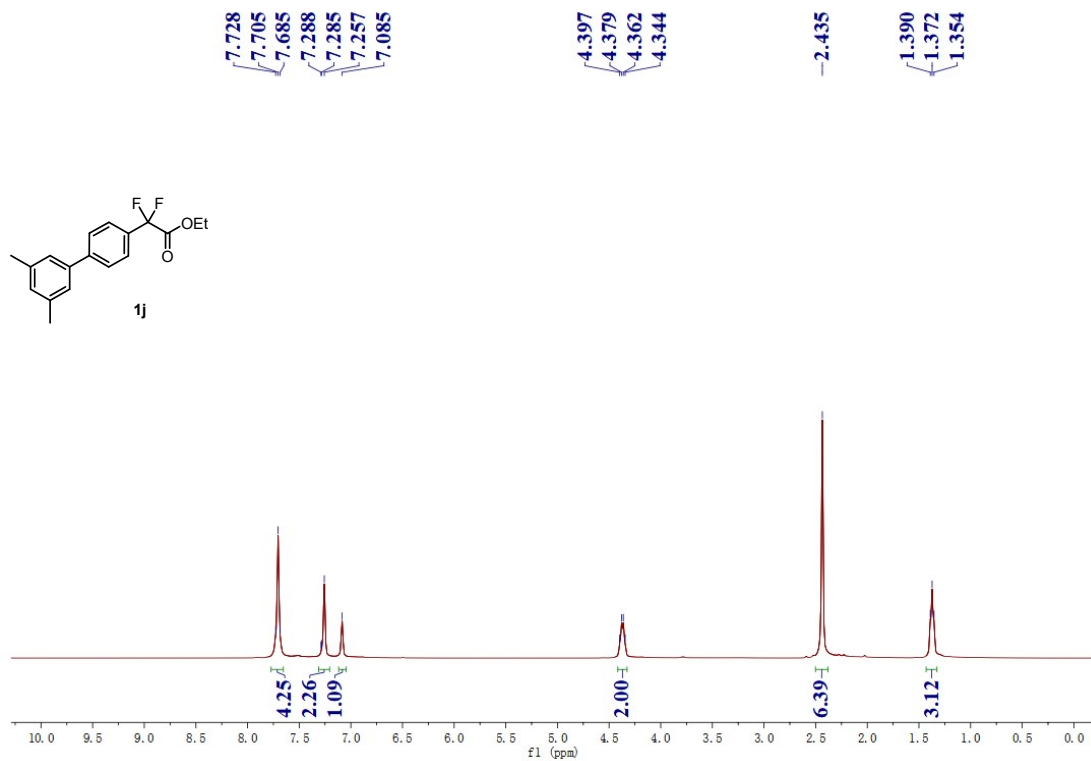

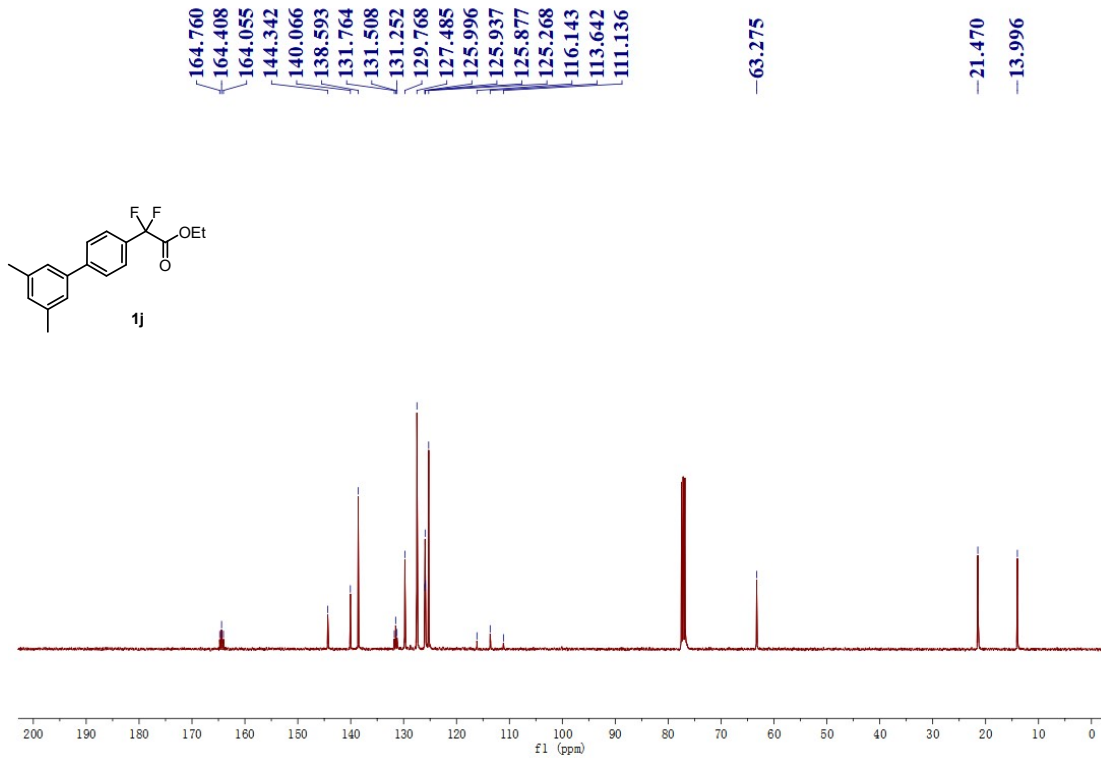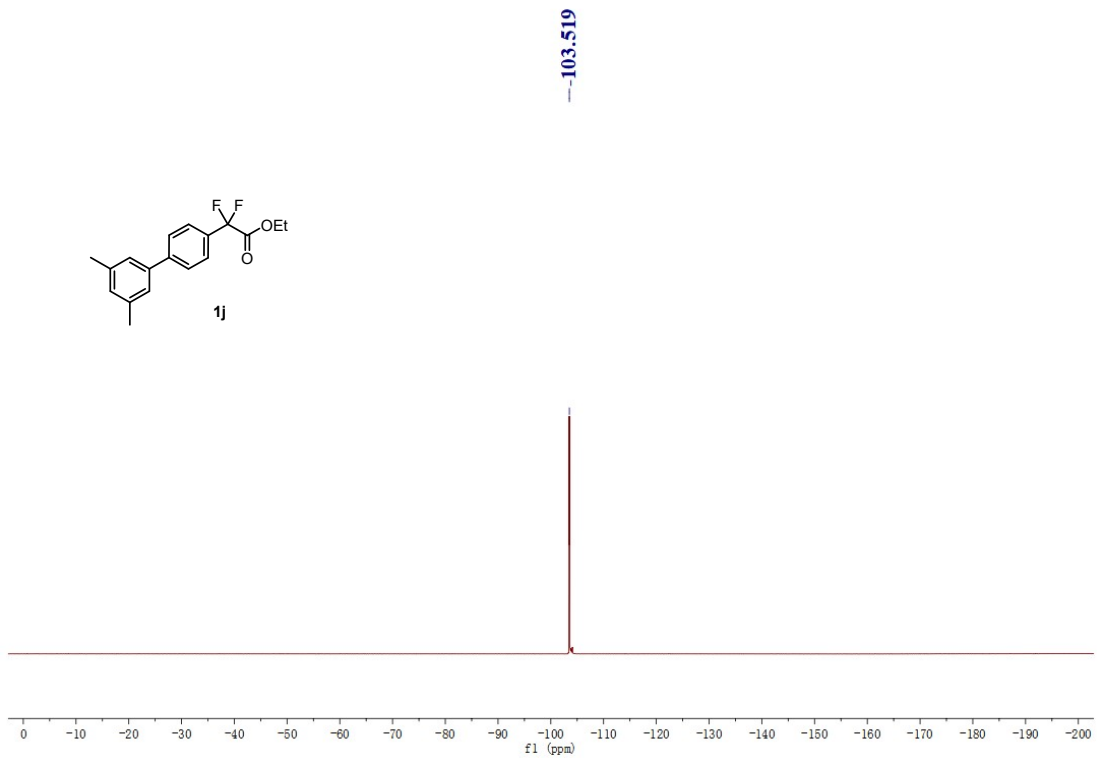

<sup>1</sup>H, <sup>13</sup>C NMR and <sup>19</sup>F spectra for compound 1k (Chloroform-d)

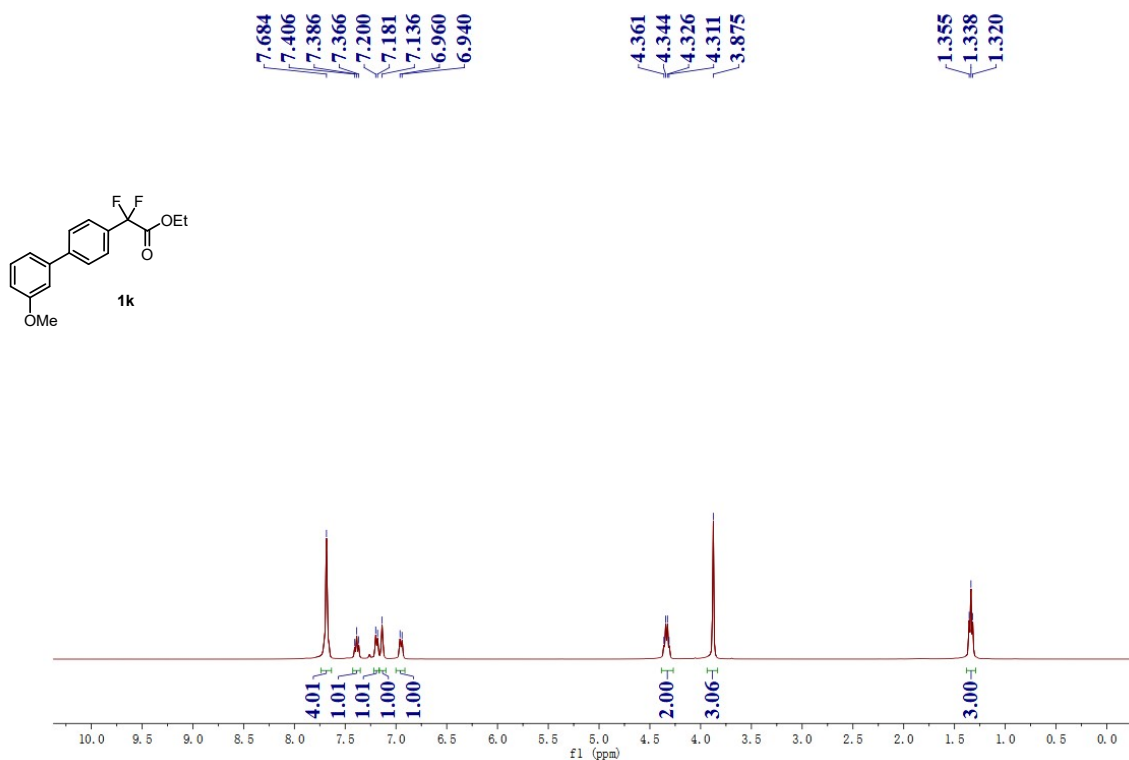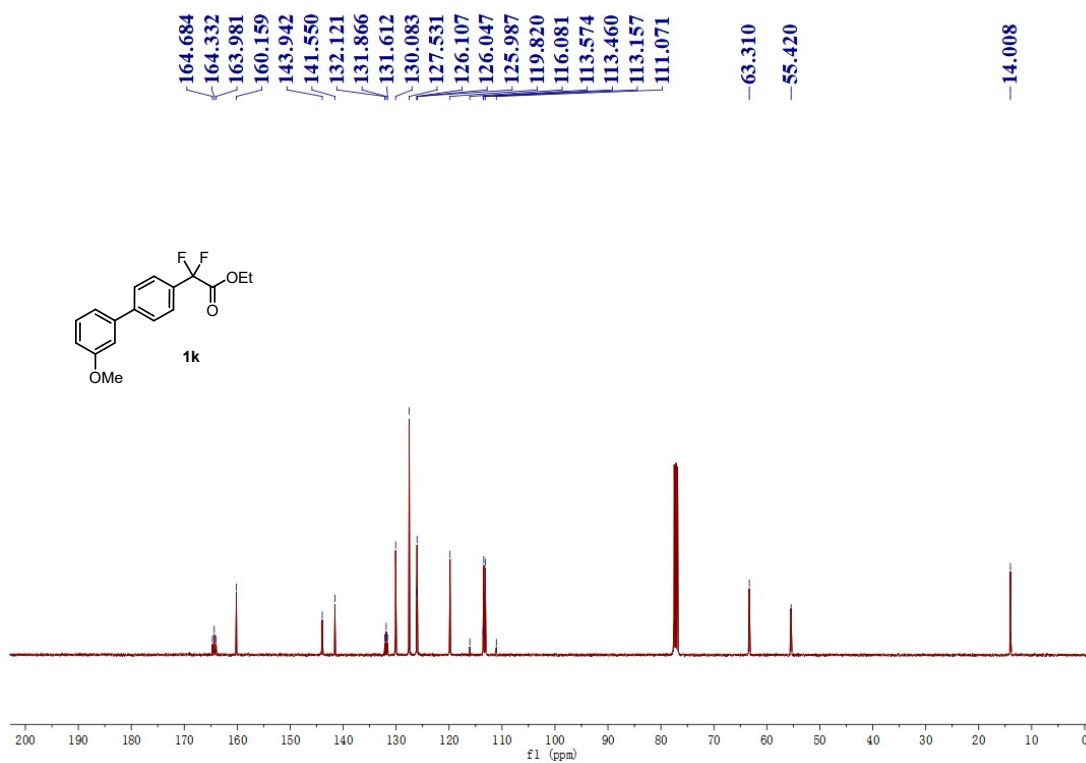



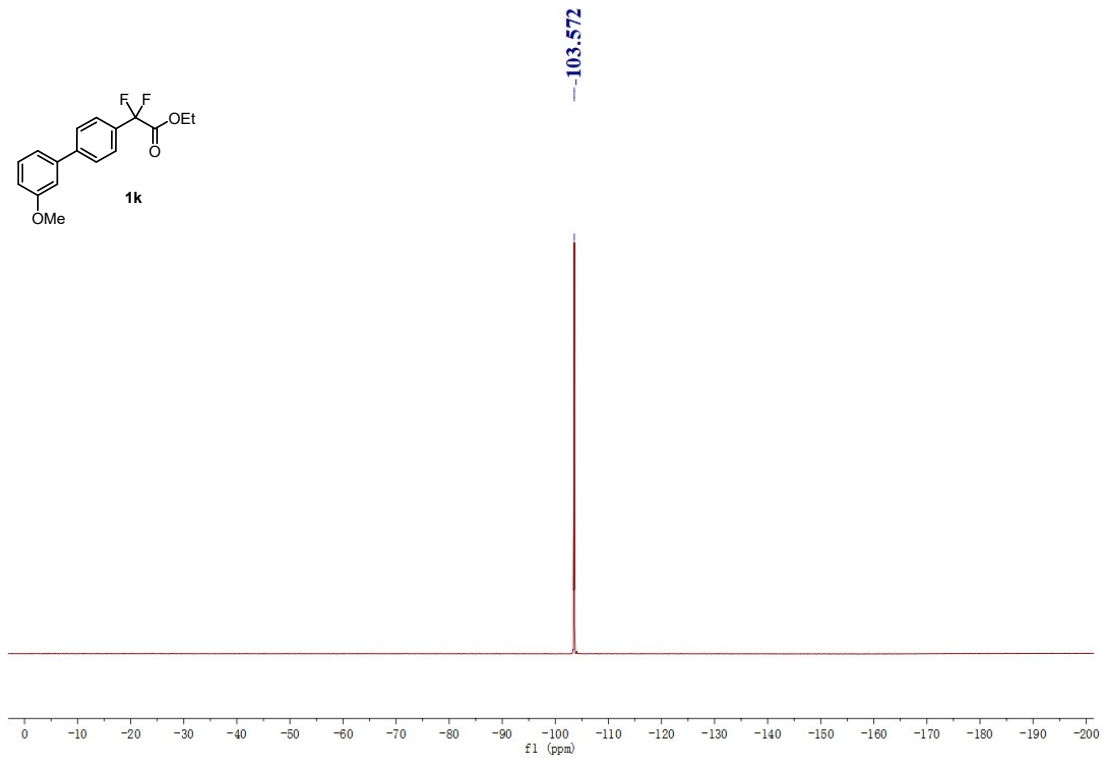

**$^1\text{H}$ ,  $^{13}\text{C}$  NMR and  $^{19}\text{F}$  spectra for compound **1l** (Chloroform-d)**

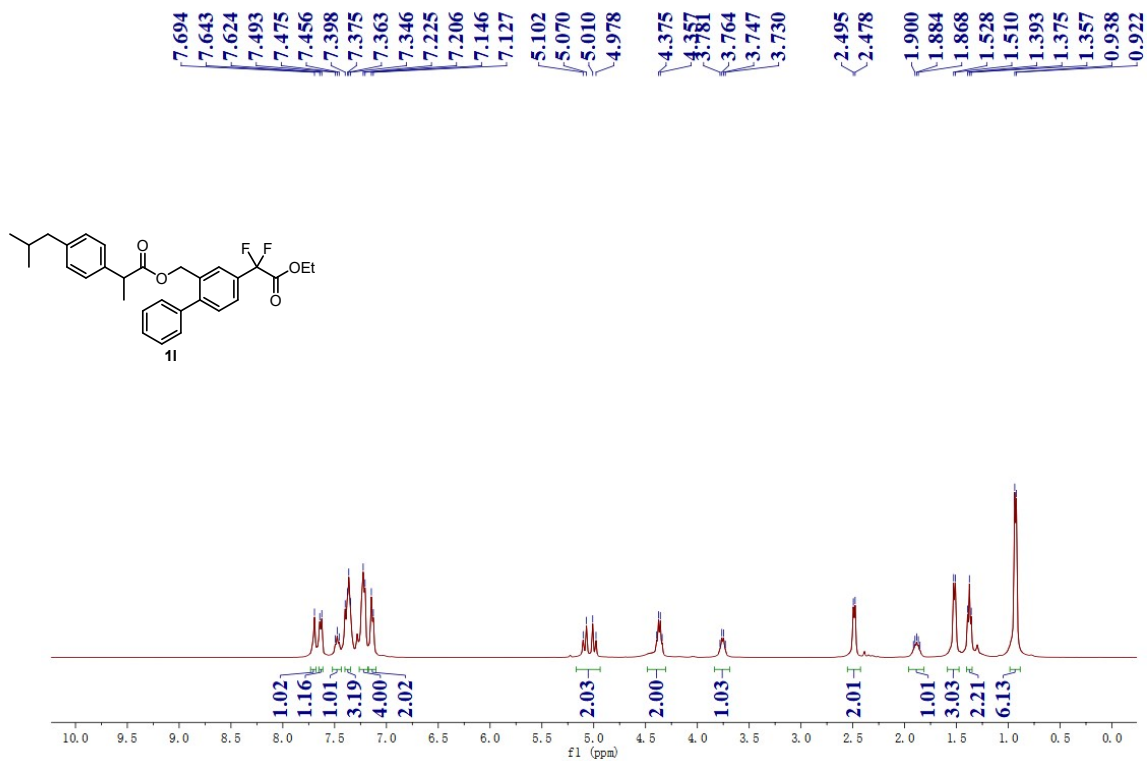

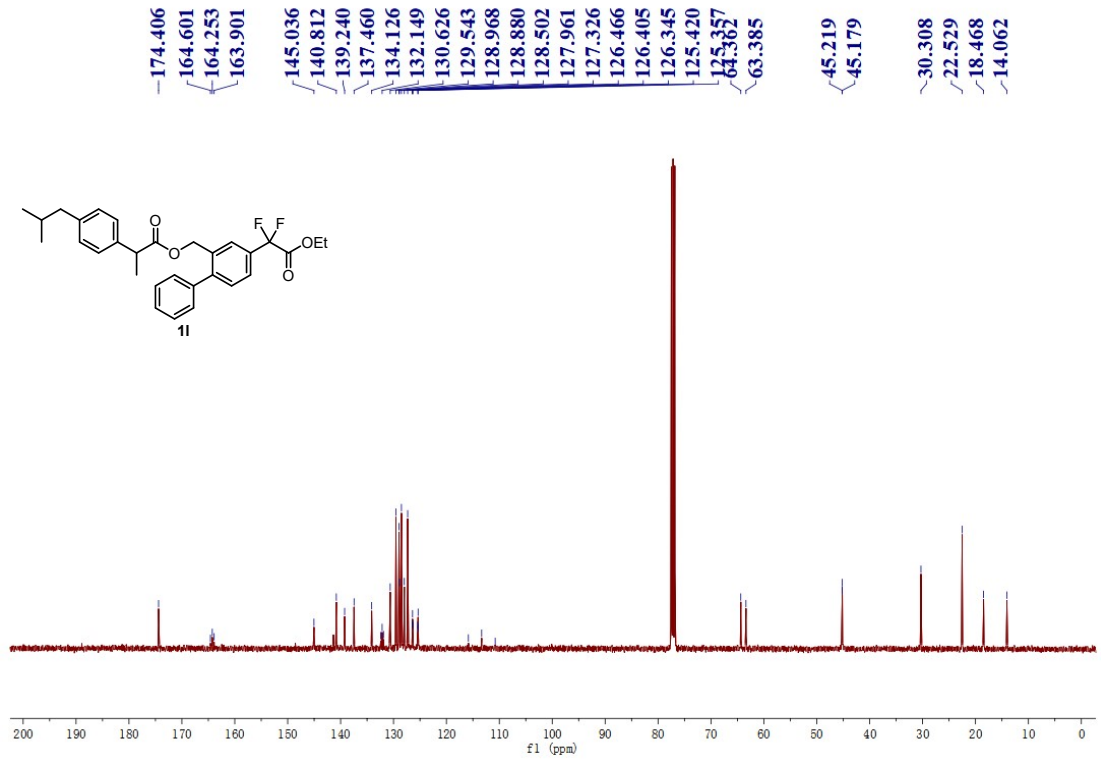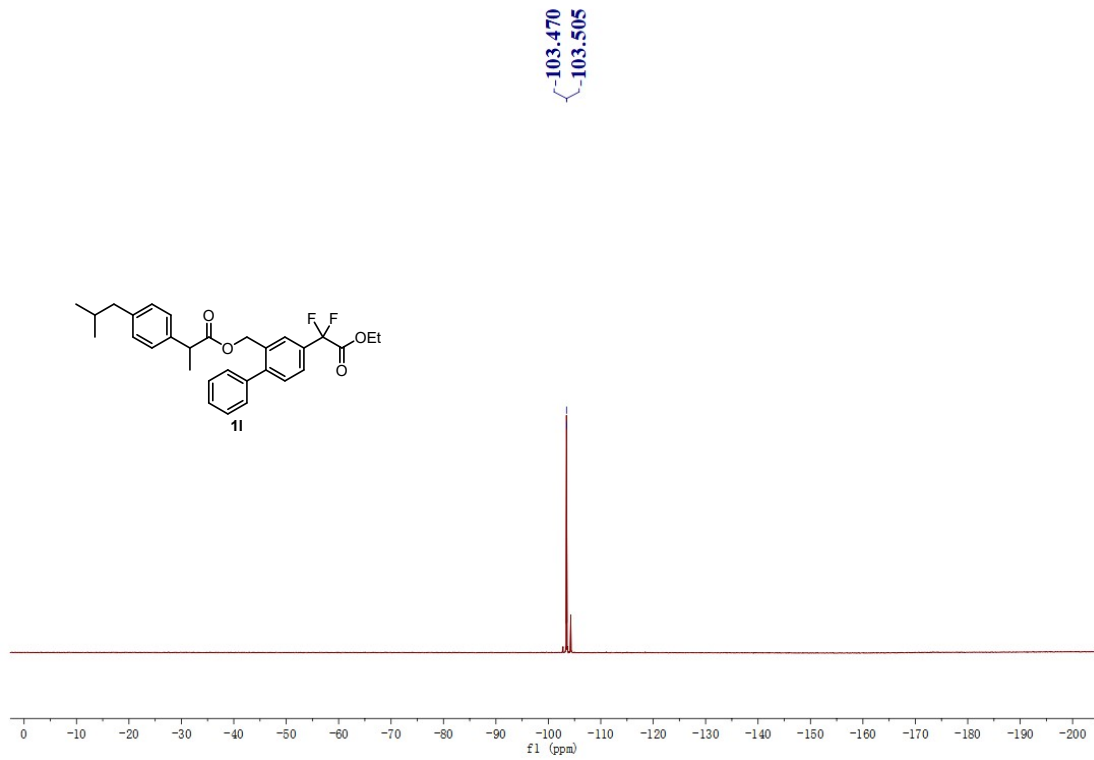

<sup>1</sup>H, <sup>13</sup>C NMR and <sup>19</sup>F spectra for compound 1m (Chloroform-d)

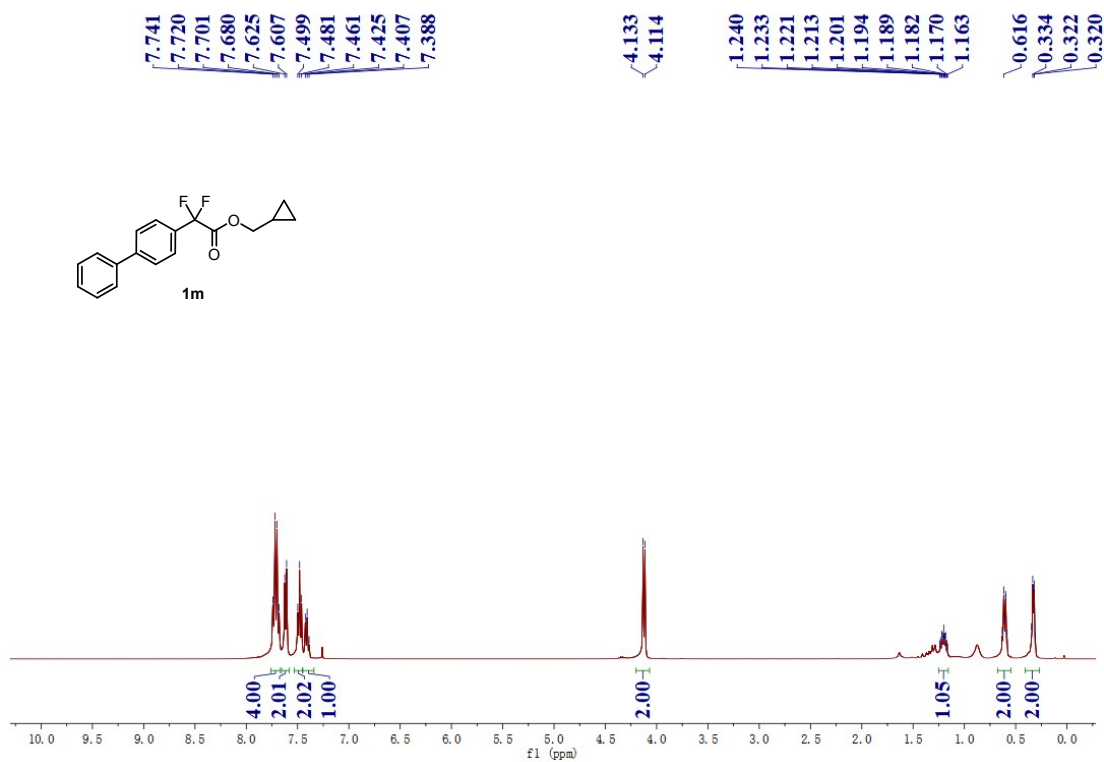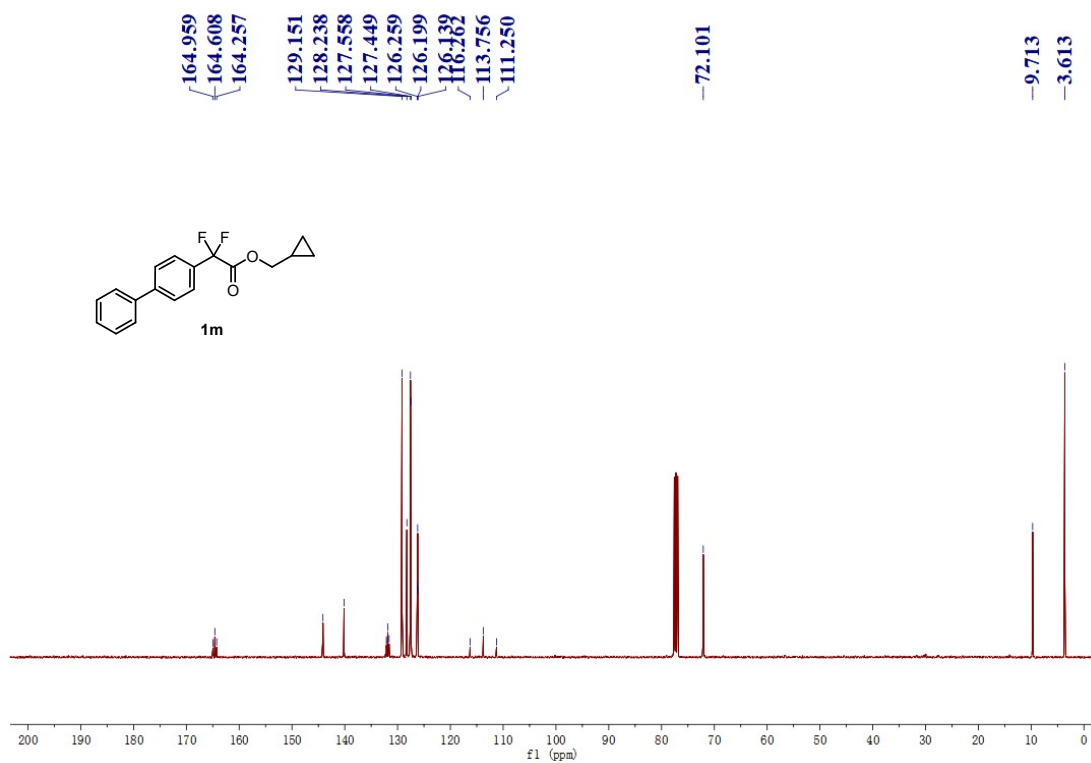

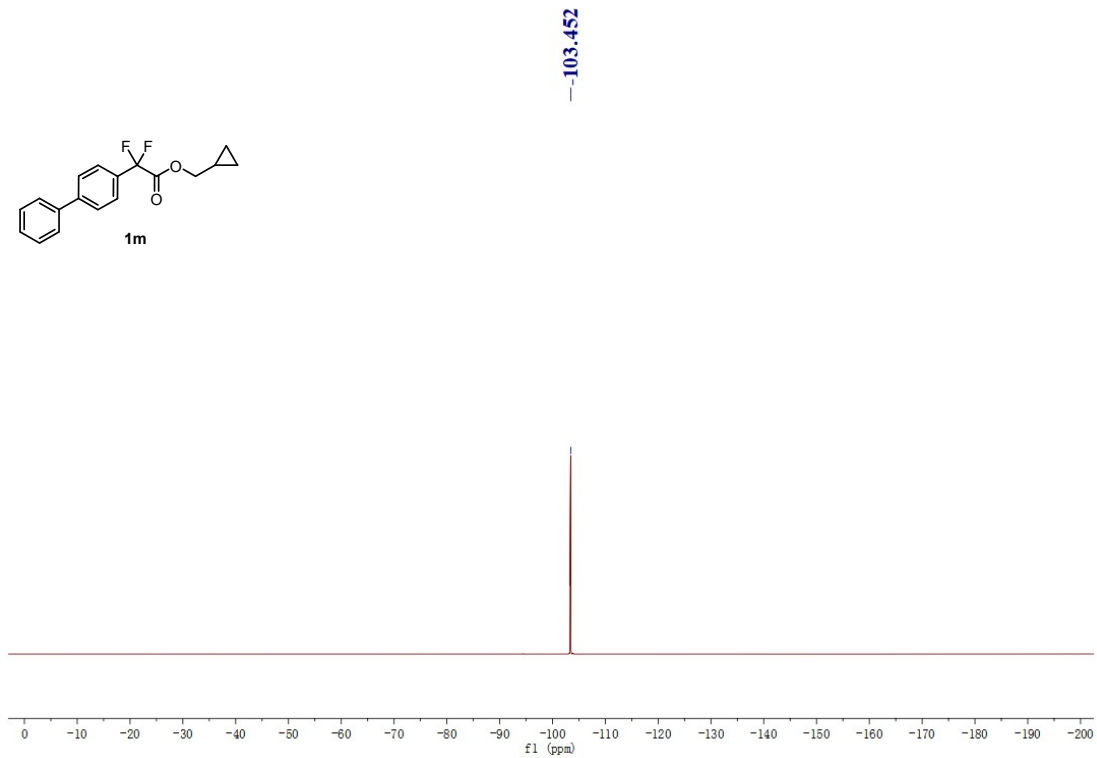

**<sup>1</sup>H, <sup>13</sup>C NMR and <sup>19</sup>F spectra for compound 1n (Chloroform-d)**

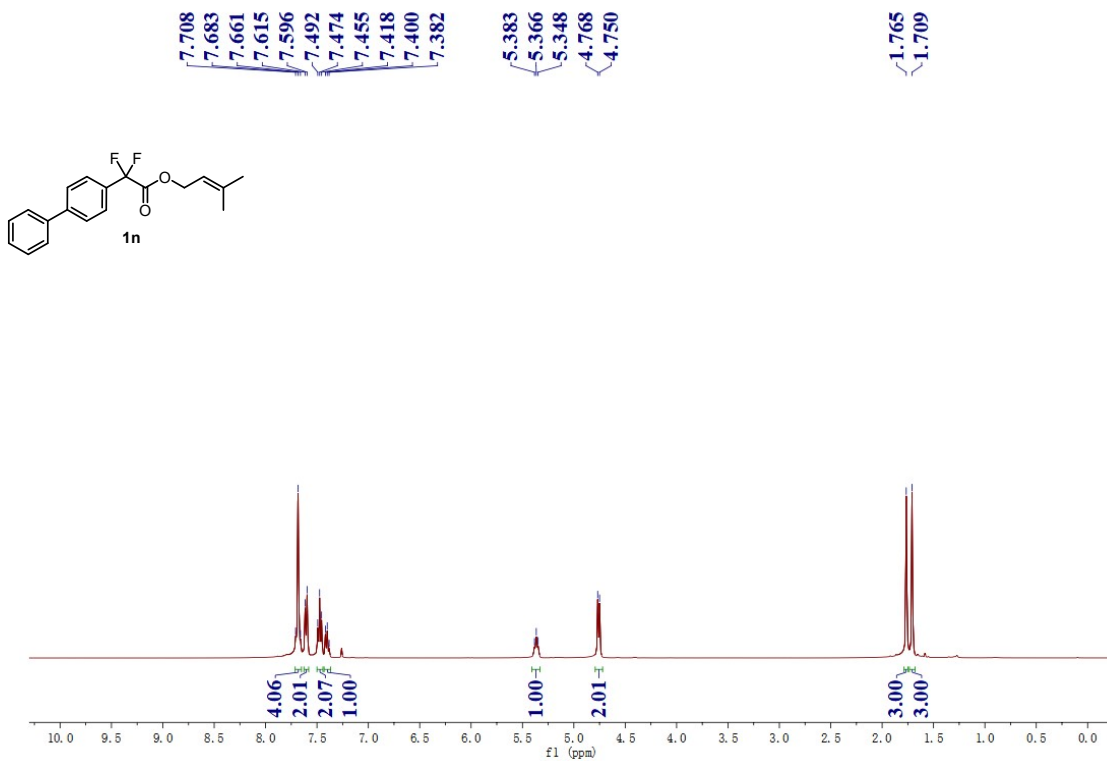

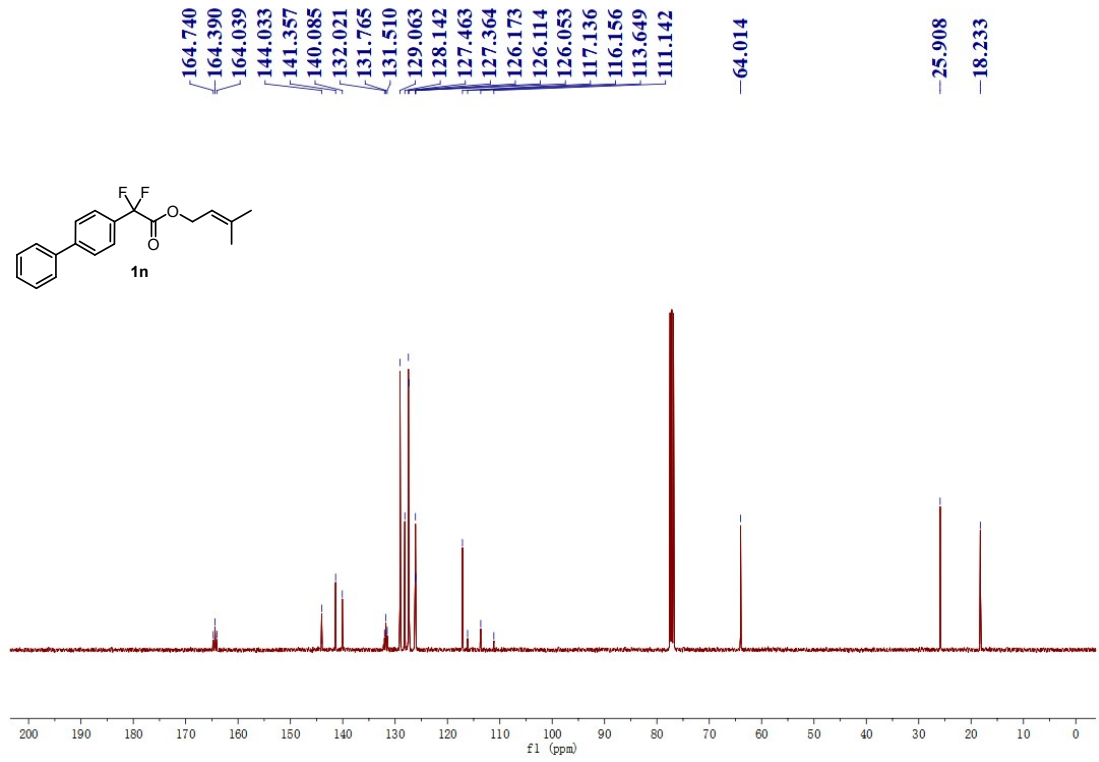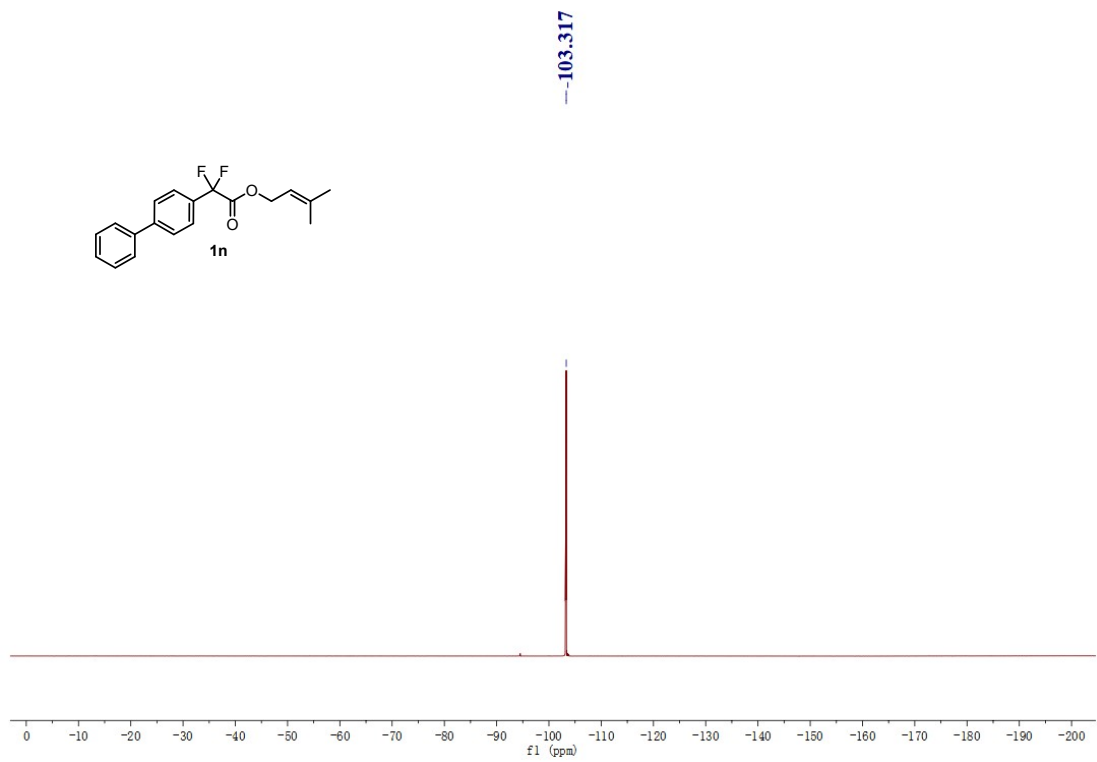

<sup>1</sup>H, <sup>13</sup>C NMR and <sup>19</sup>F spectra for compound 1o (Chloroform-d)

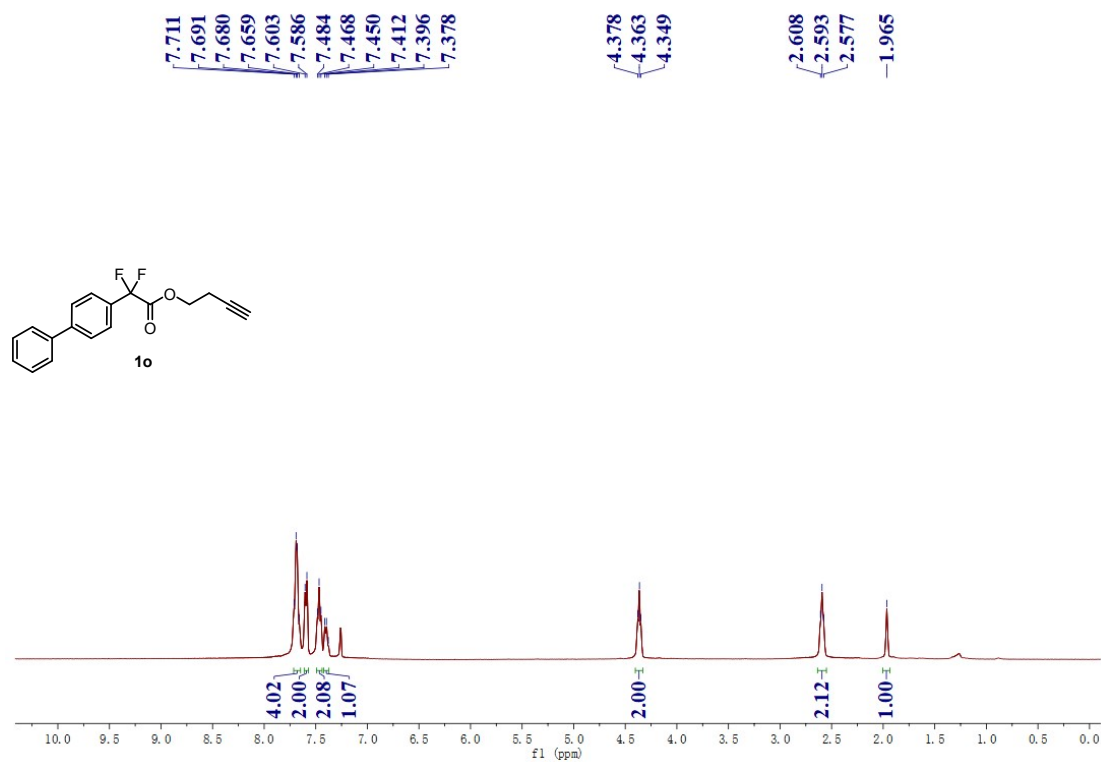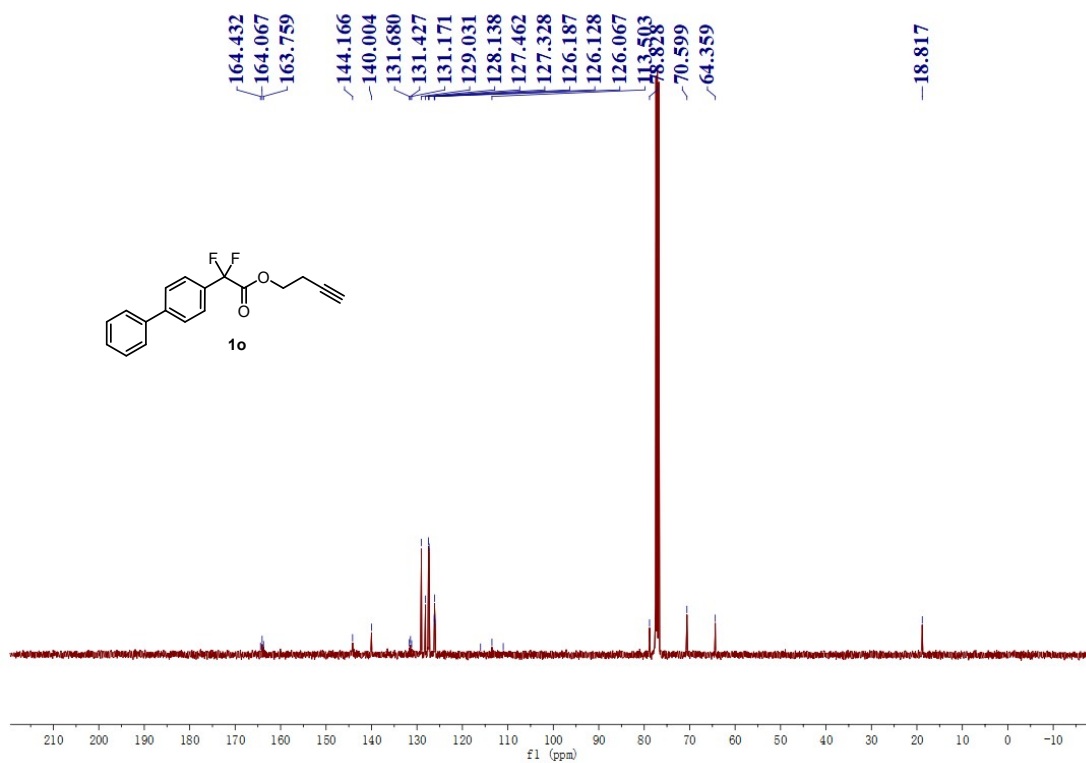

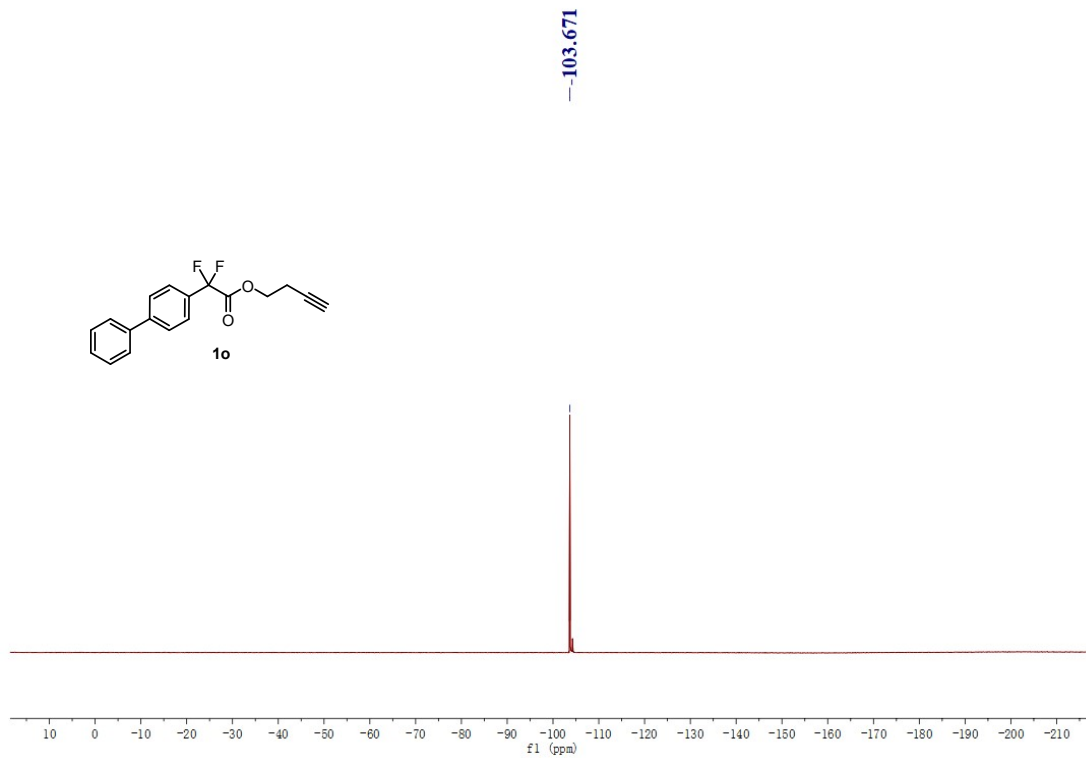

**<sup>1</sup>H, <sup>13</sup>C NMR and <sup>19</sup>F spectra for compound 1p (Chloroform-d)**

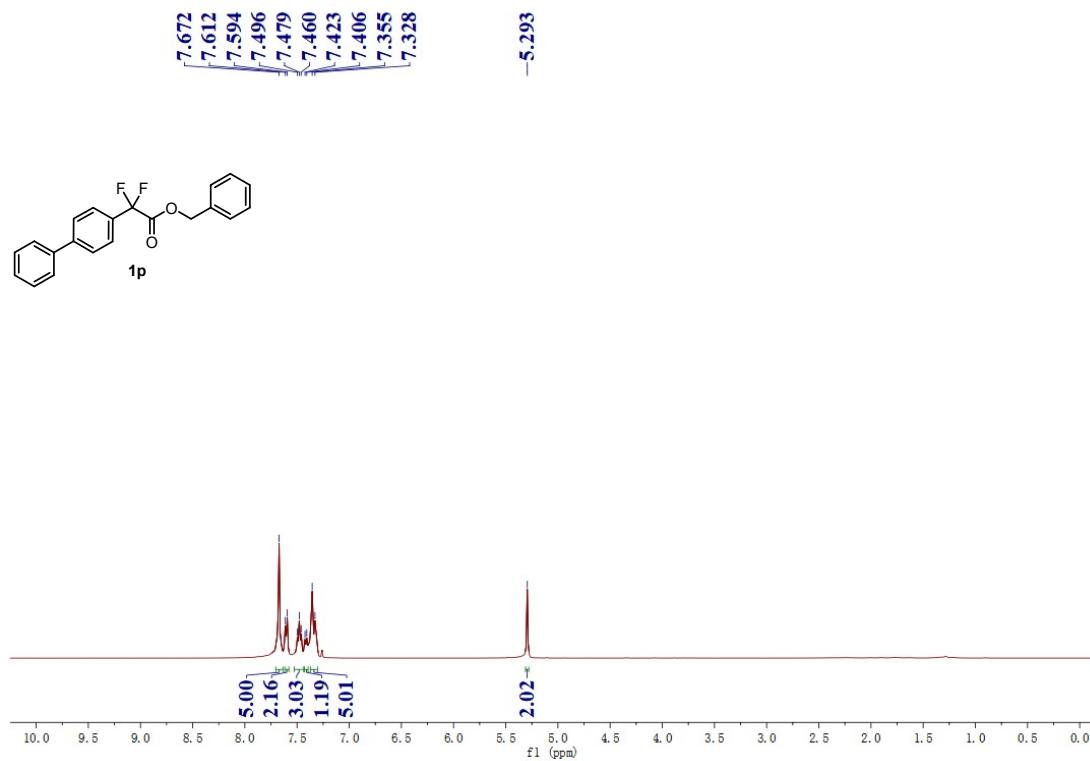

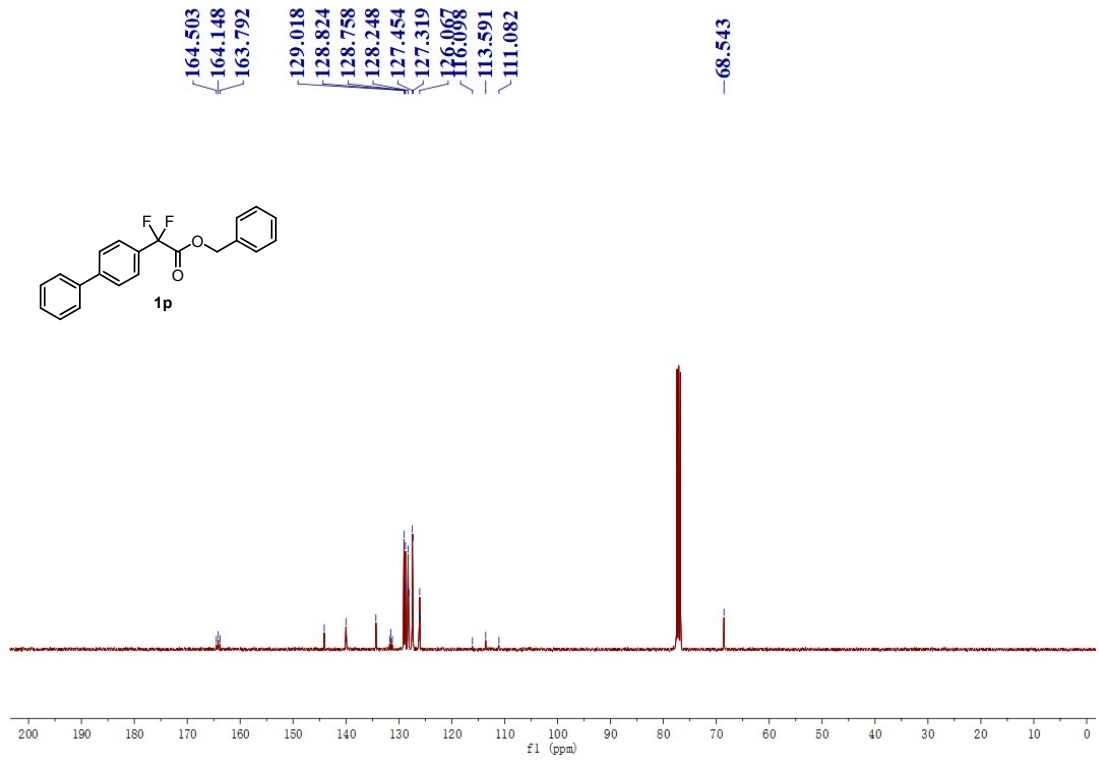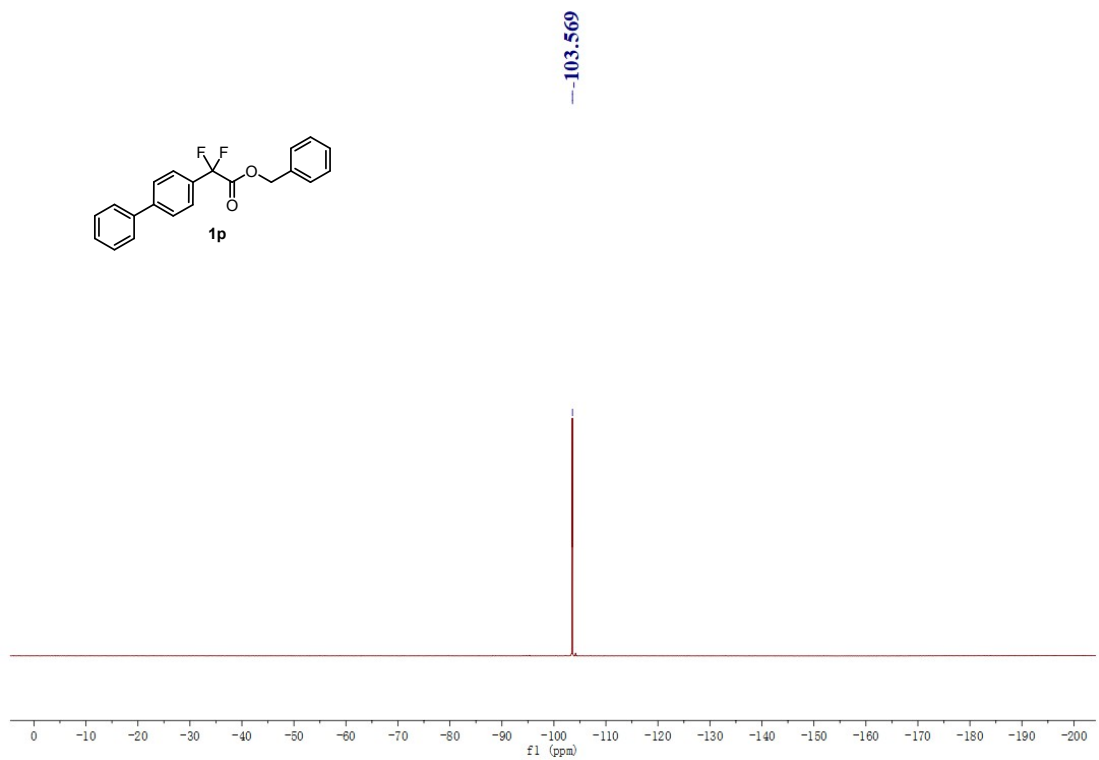



<sup>1</sup>H, <sup>13</sup>C NMR and <sup>19</sup>F spectra for compound 1q (Chloroform-d)

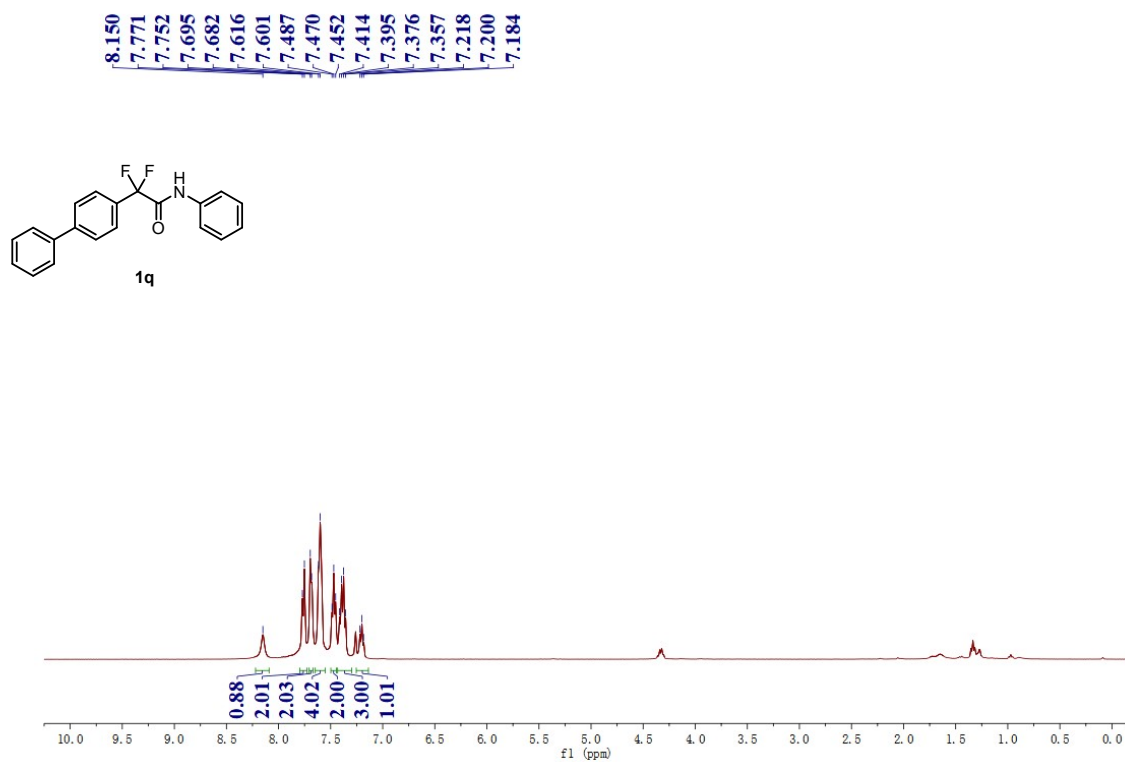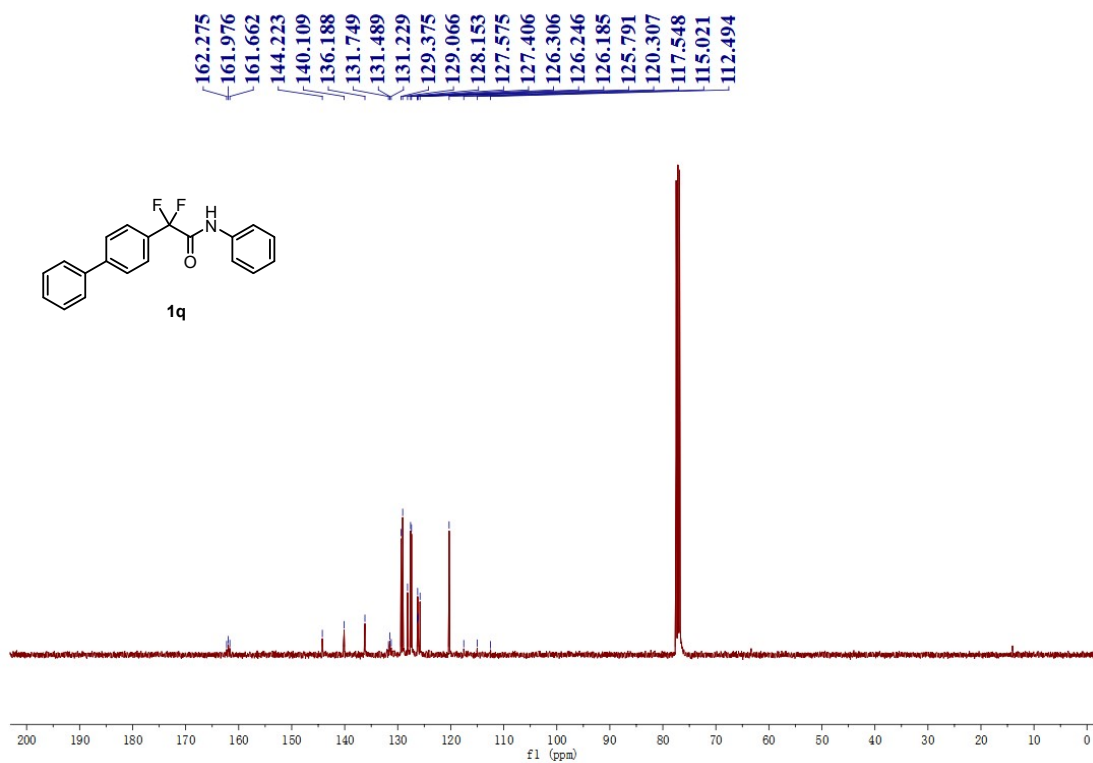

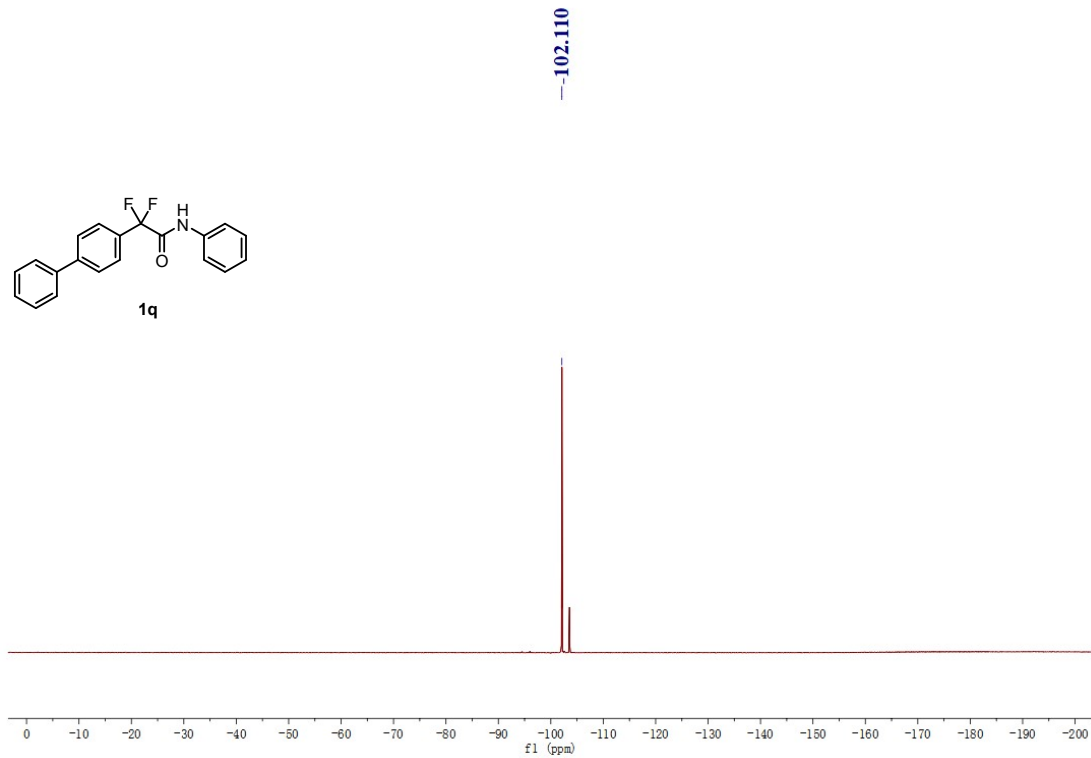

**<sup>1</sup>H, <sup>13</sup>C NMR and <sup>19</sup>F spectra for compound 1r (Chloroform-d)**

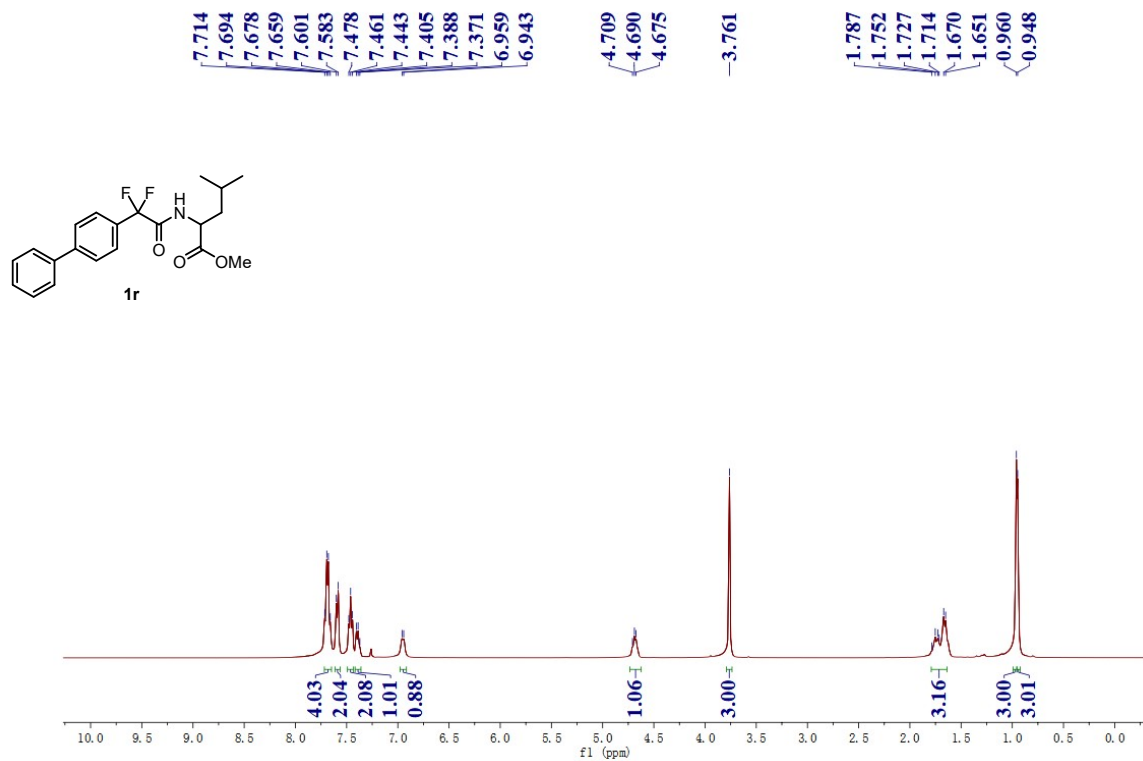

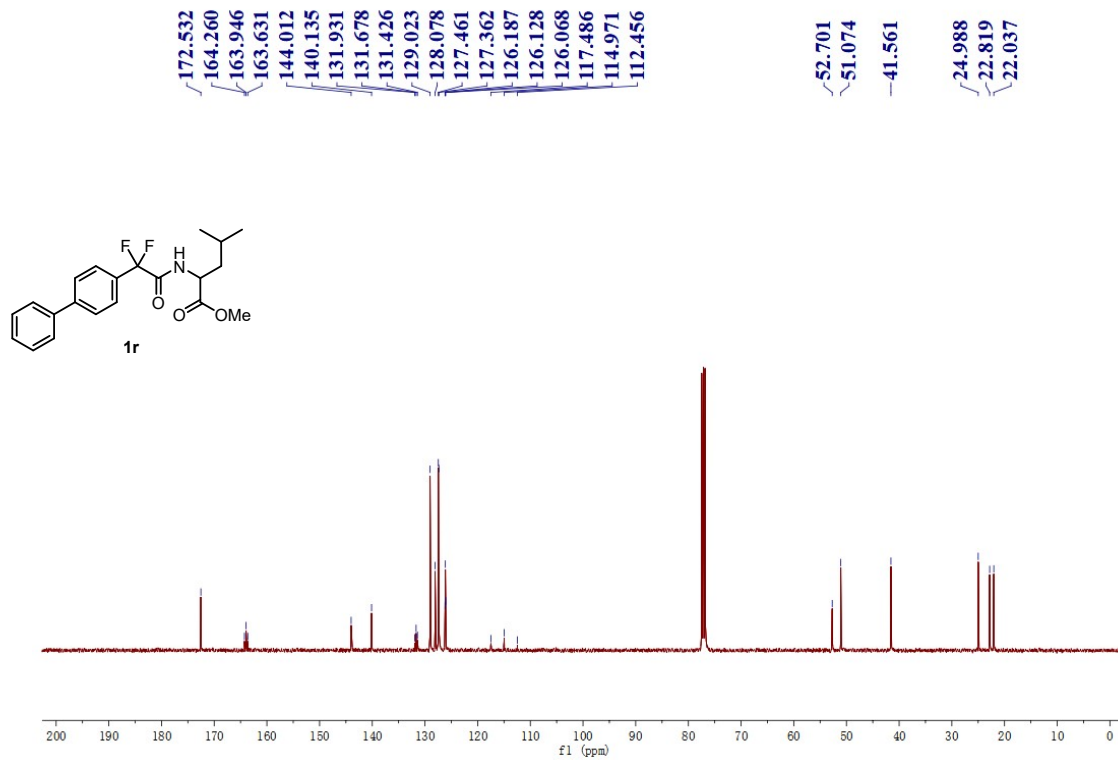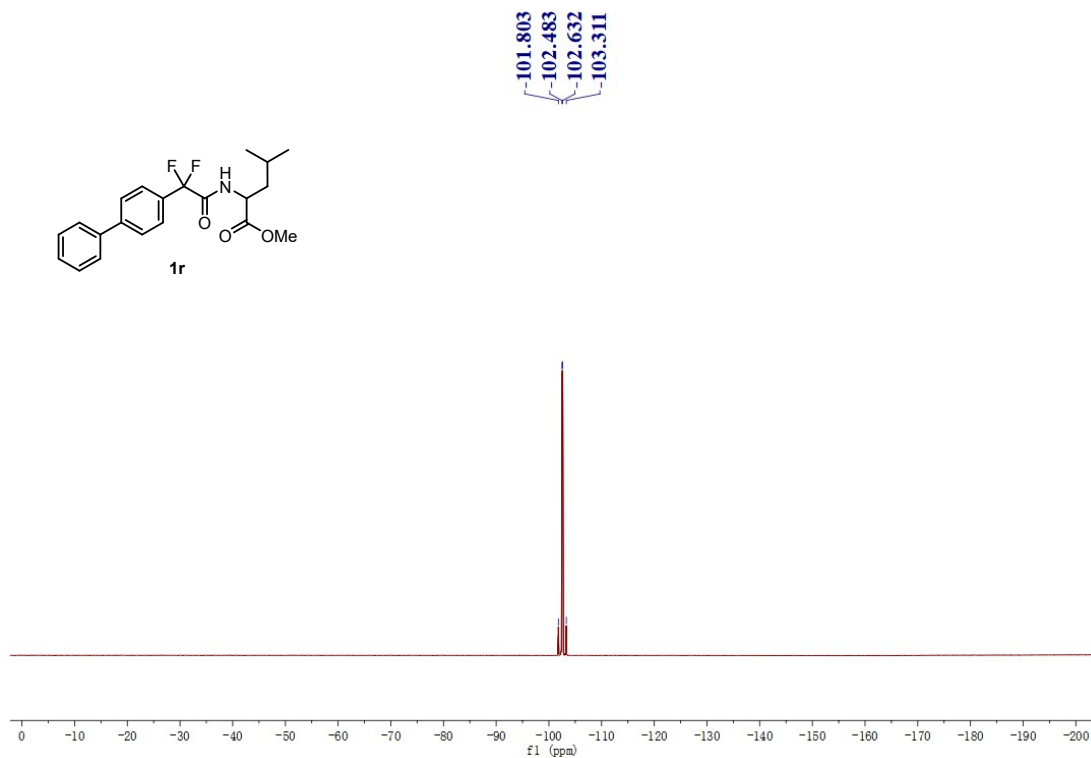

<sup>1</sup>H, <sup>13</sup>C NMR and <sup>19</sup>F spectra for compound 1s (Chloroform-d)

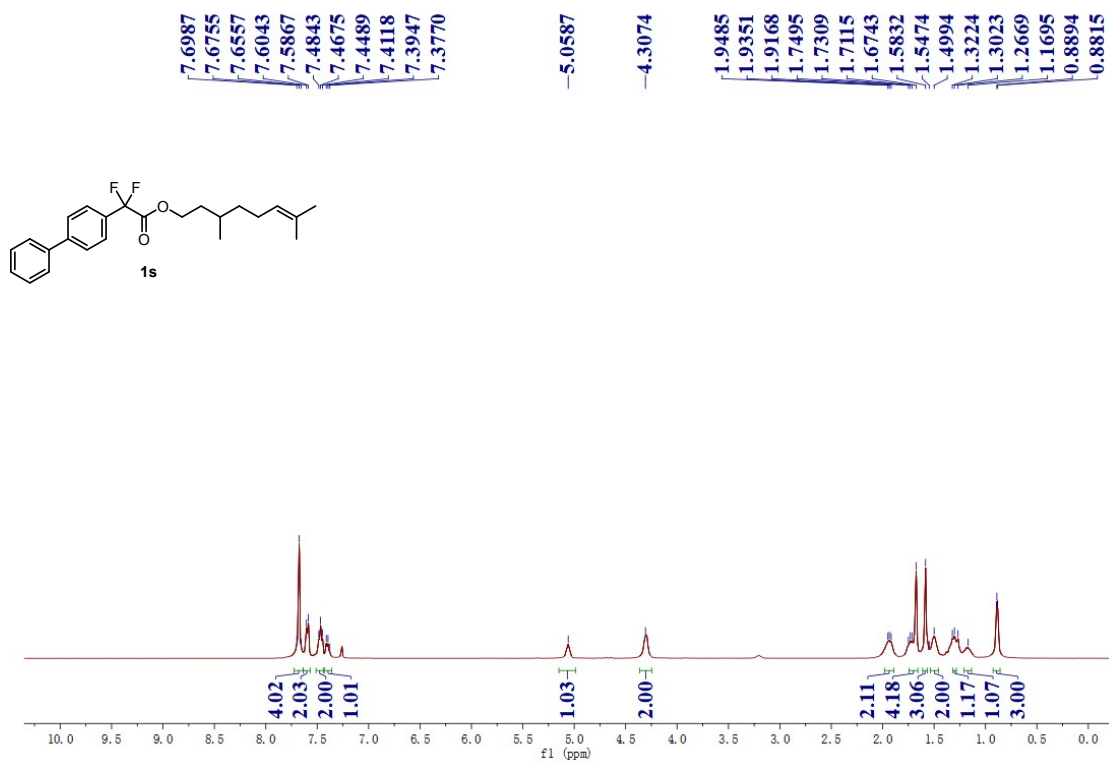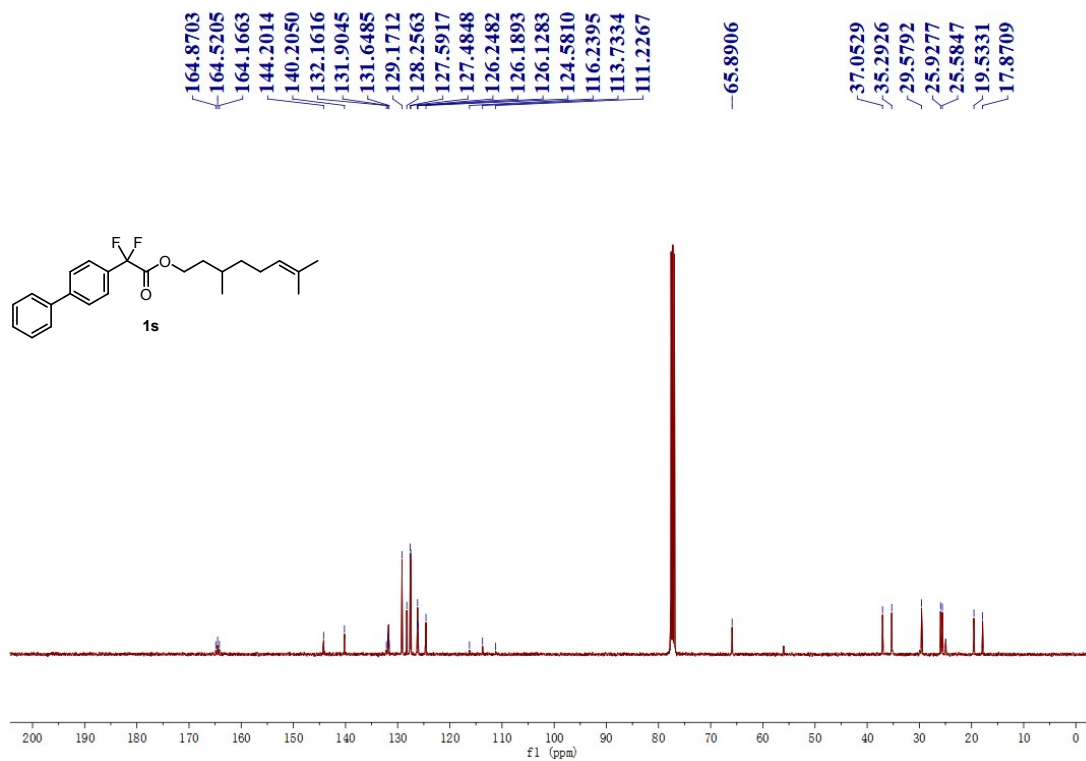

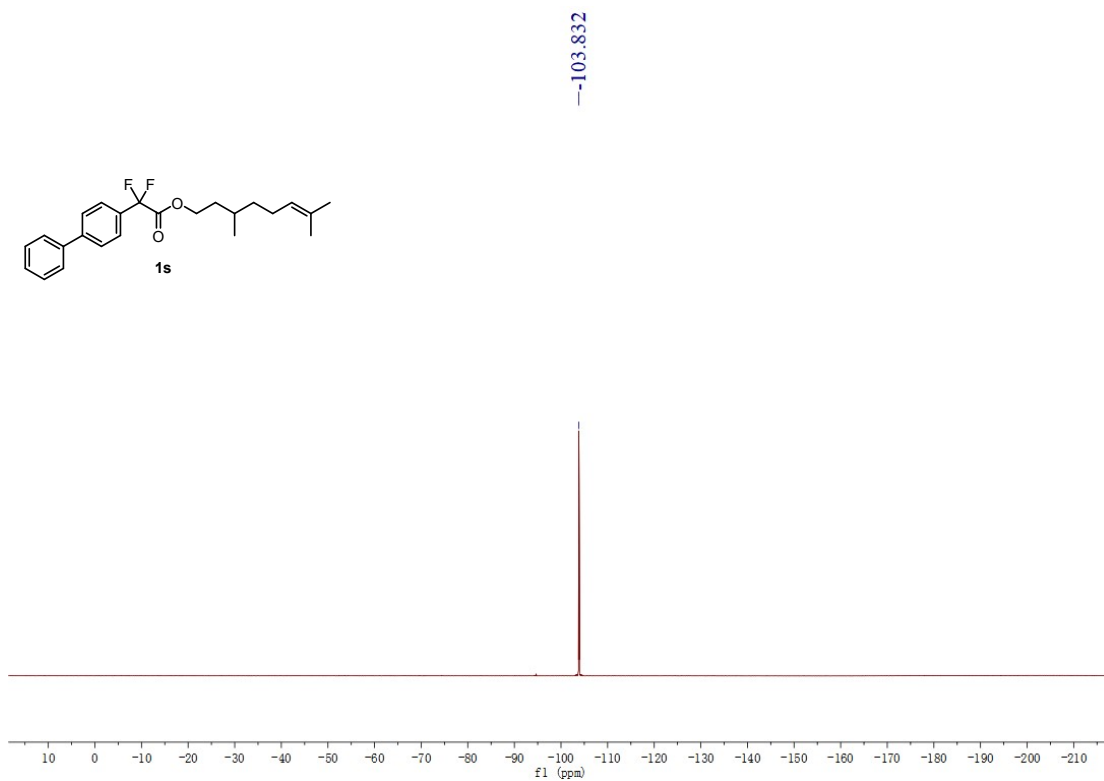

**<sup>1</sup>H, <sup>13</sup>C NMR and <sup>19</sup>F spectra for compound 1t (Chloroform-d)**

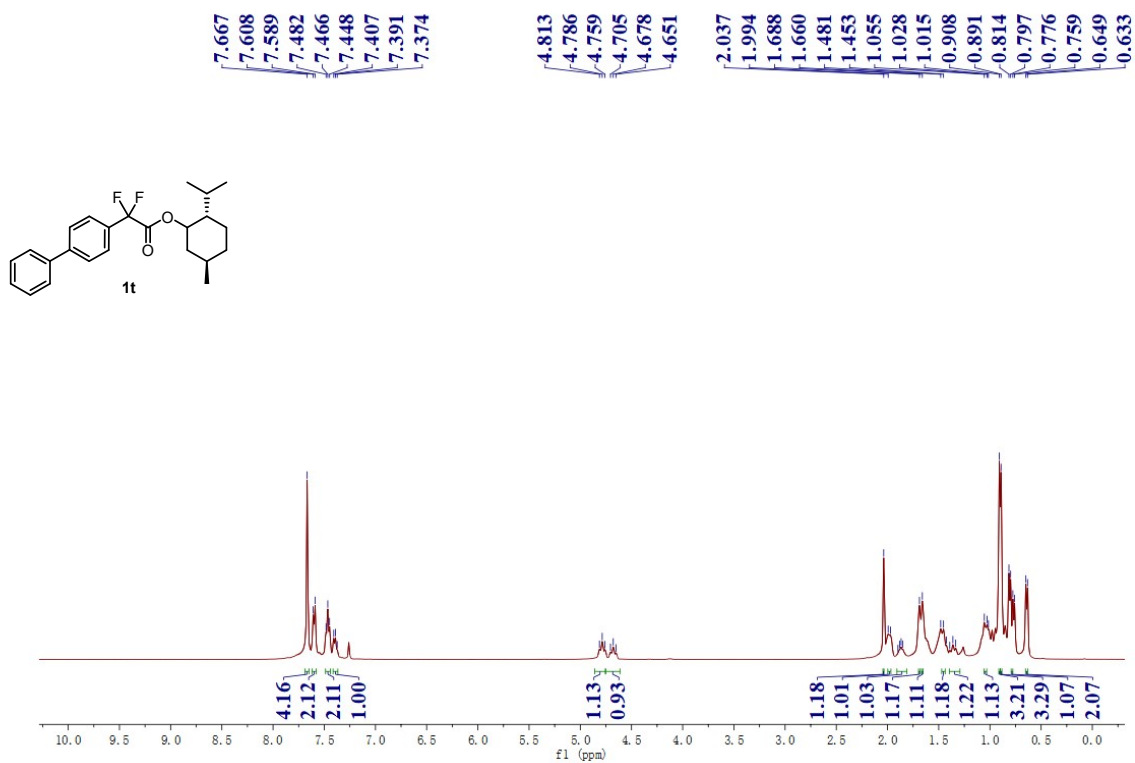

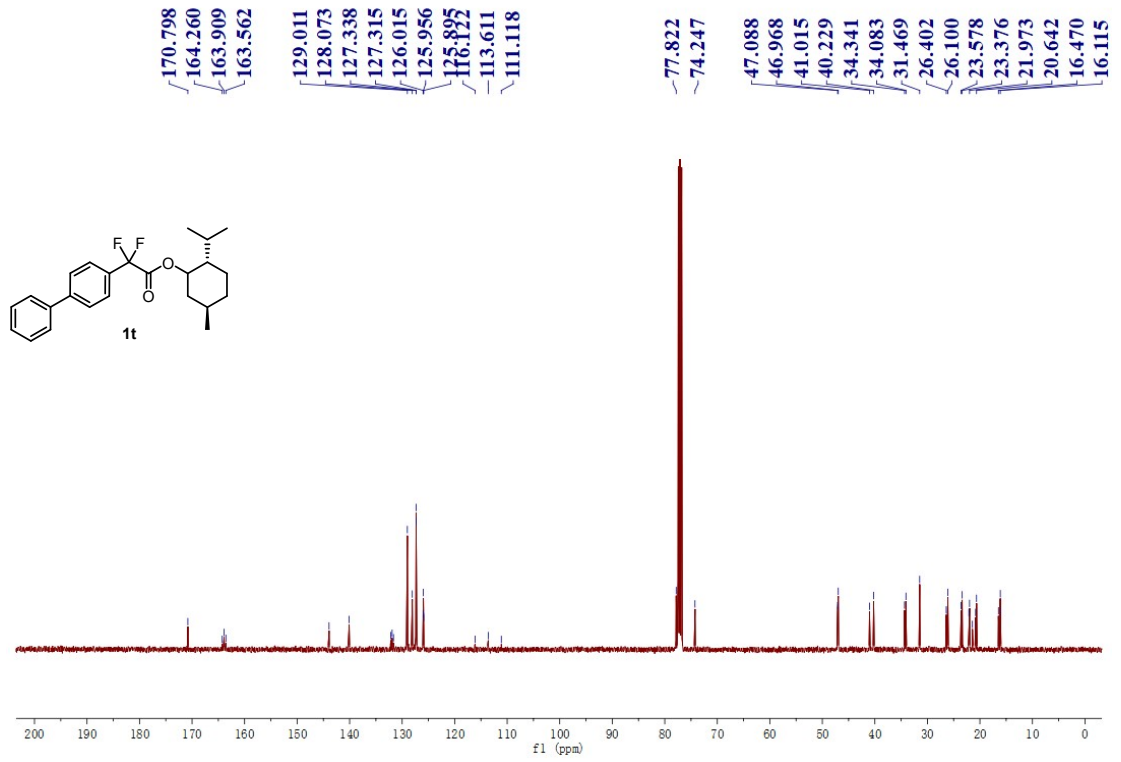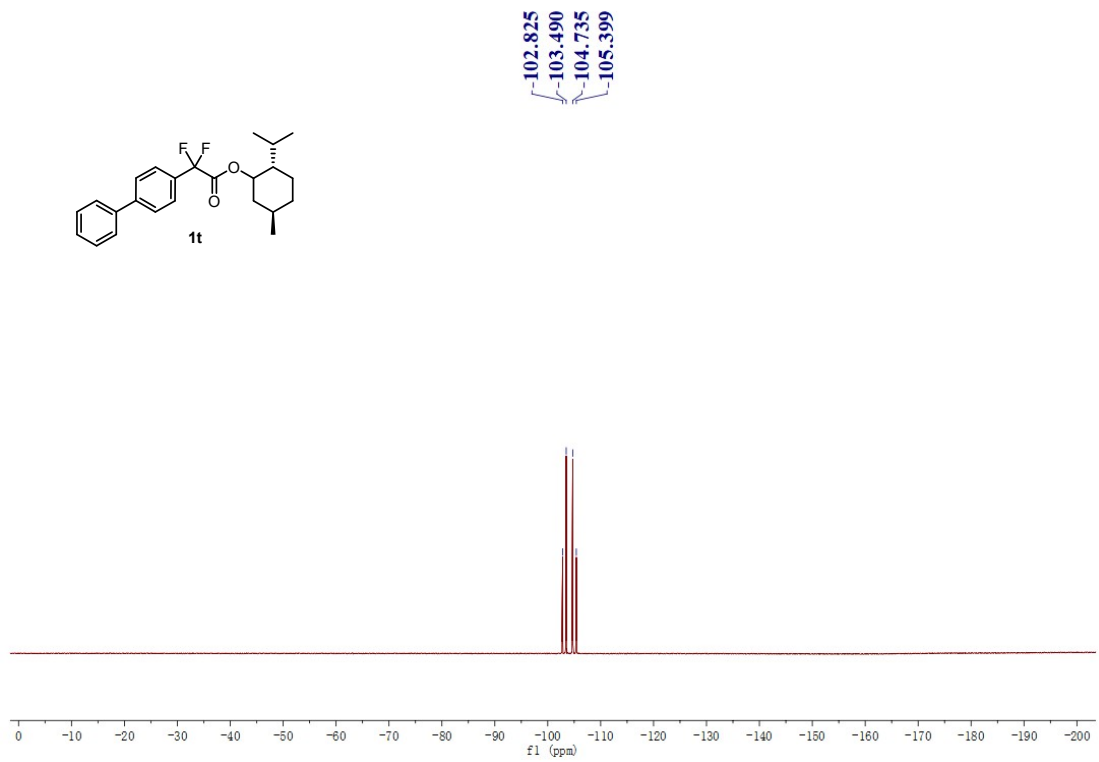

<sup>1</sup>H, <sup>13</sup>C NMR and <sup>19</sup>F spectra for compound 1u (Chloroform-d)

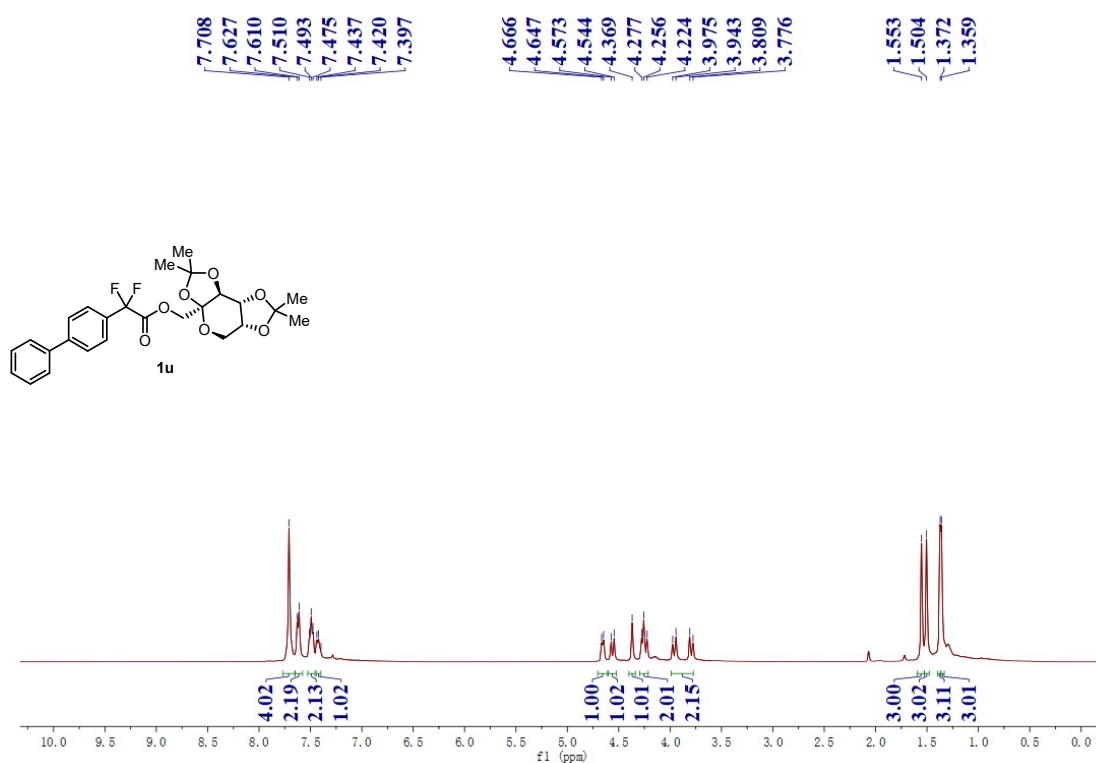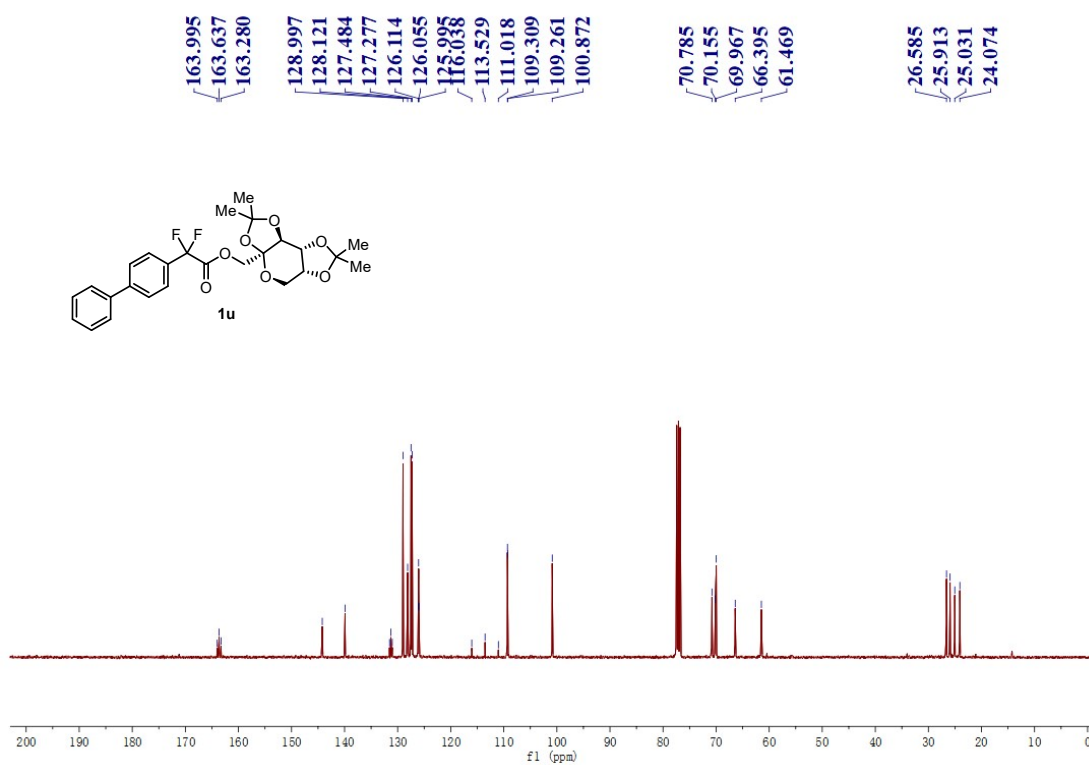

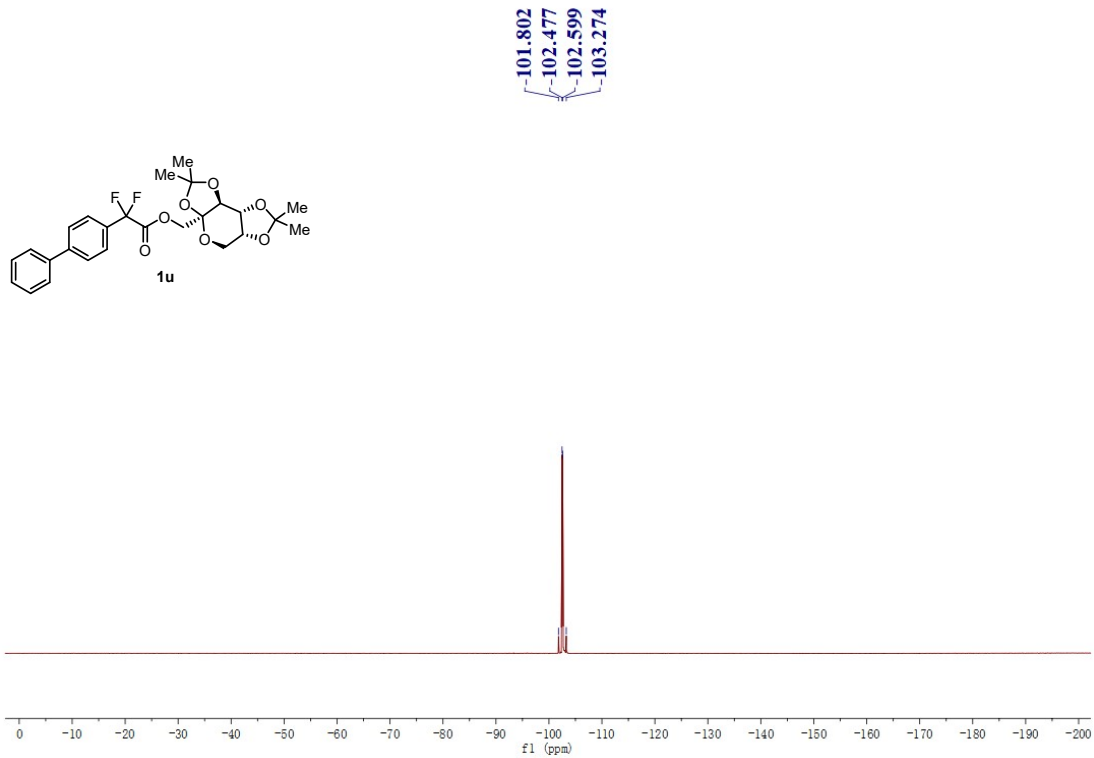

$^1\text{H}$ ,  $^{13}\text{C}$  NMR and  $^{19}\text{F}$  spectra for compound **1v** (Chloroform-d)

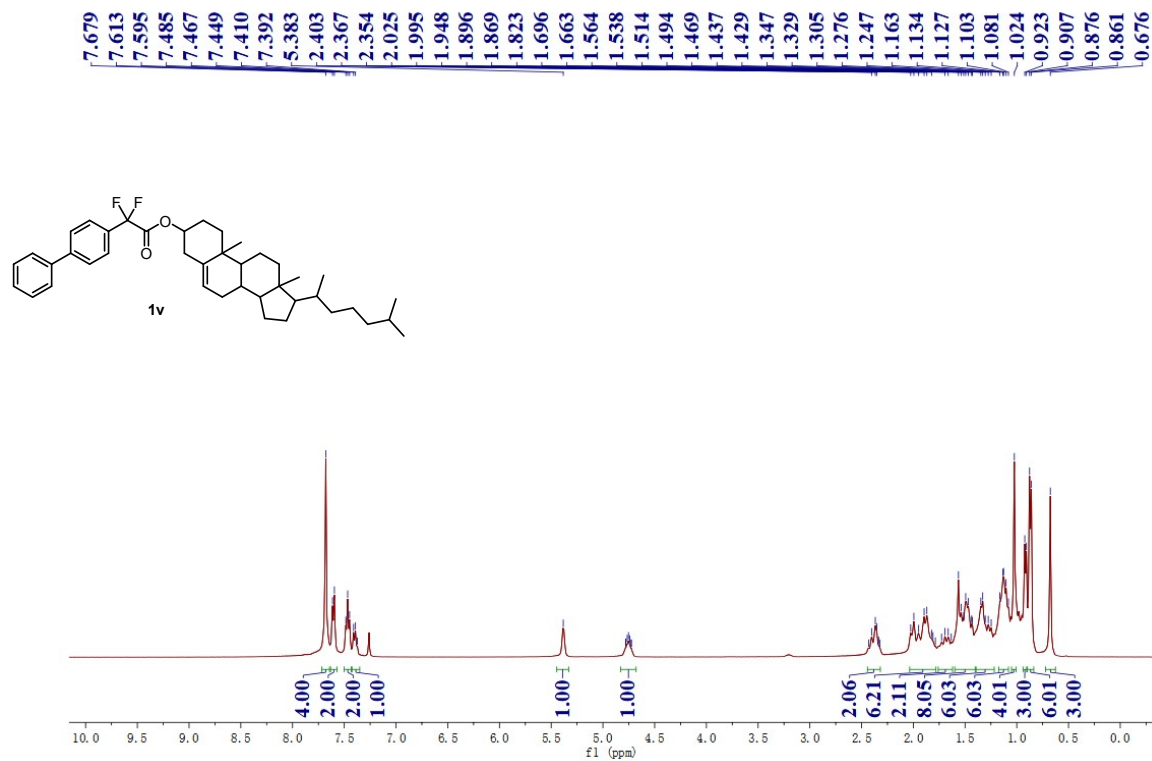



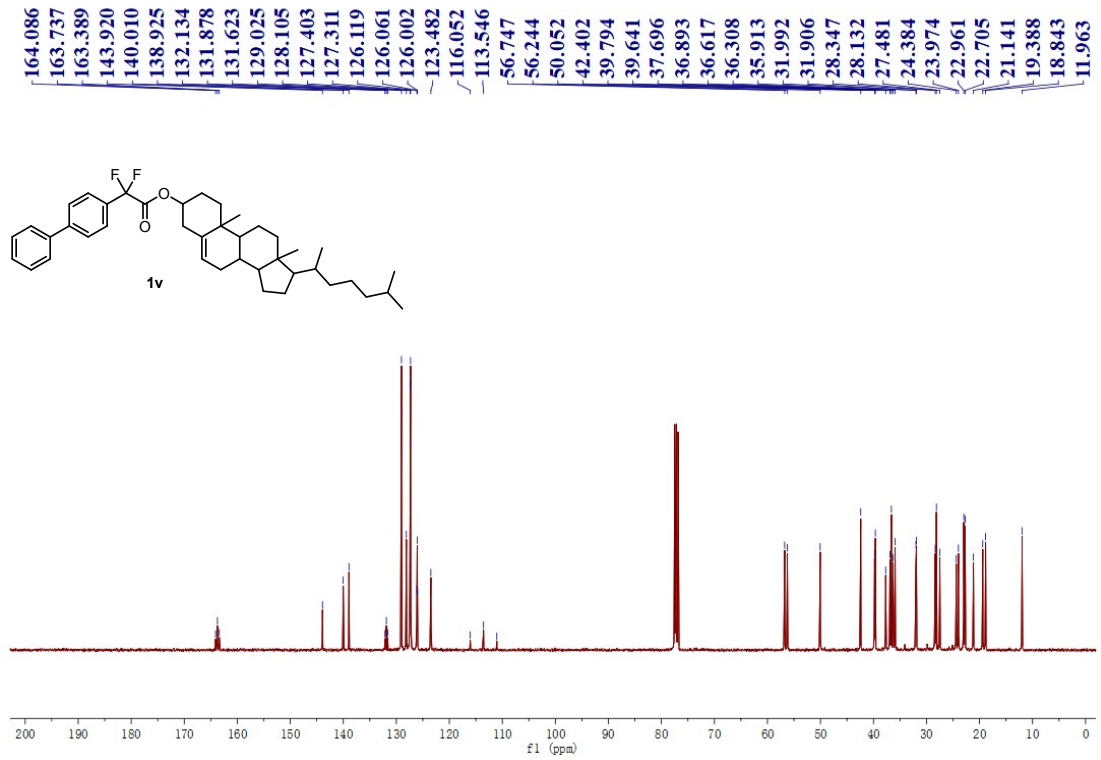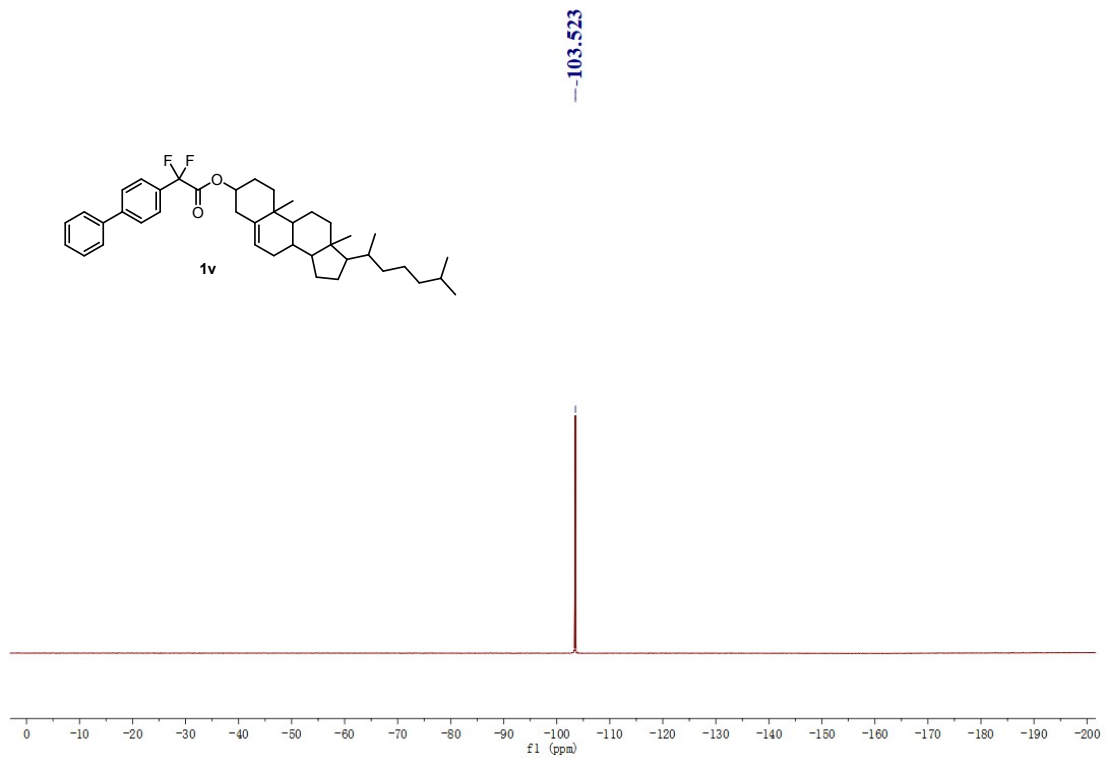

Supplement: d4qo00781f1.pdf [file d4qo00781f1.pdf]
